# Supplementary material for: Transcriptomes and shRNA Suppressors in a TP53 Allele–Specific Model of Early-Onset Colon Cancer in African Americans
Source: Oxford University Press journal article supplement (doi:10.1158/1541-7786.mcr-13-0286-t), 2014-04-18
Supplement: 15417786mcr130286t-sup-mcr-13-0286tab1-8.xls [file 15417786mcr130286t-sup-mcr-13-0286tab1-8.xls]

## Sheet: TableS1-TP53 Genotype Frequency
Supplemental Table S1: TP53 Codon 72 Polymorphism Genotype Frequency
Ethnic Group	Data Source	Category	PP	PR	RR	PP Genotype Frequency
European American	1000 Genomes	Non-Cancer	5	32	48	0.0588235
European American	Exome Variant Server	Non-Cancer	300	1591	2409	0.0697674
European American	Combined	Non-Cancer	305	1623	2457	0.0695553
European American	Cancer Genetics Lab	COAD	5	24	40	0.0724638
European American	TCGA	COAD	8	47	96	0.0529801
European American	Combined	COAD	13	71	136	0.0590909
African American	1000 Genomes	Non-Cancer	23	28	10	0.377049
African American	Exome Variant Server	Non-Cancer	804	1012	386	0.365123
African American	Combined	Non-Cancer	827	1040	396	0.365444
African American	Cancer Genetics Lab	COAD	12	7	5	0.5
African American	TCGA	COAD	13	9	3	0.52
African American	Combined	COAD	25	16	8	0.510204

## Sheet: TableS2-RNA-Seq
Supplementary Table S2:RNA-Seq Data
Gene	WT_C	WT_E	KO_C	KO_E	Pro1_C	Pro1_E	Pro2_C	Pro2_E	Arg1_C	Arg1_E	Arg2_C	Arg2_E	Test 1 Raw P-value	Test 1 FDR Adjusted P-value	Test 2 Raw P-value	Test 2 FDR Adjusted P-value
61E3.4	1057	1162	1149	706	797	984	659	738	530	889	1055	1349	0.231768	0.475744	0.855037	0.999913
A1BG	7	12	3	10	1	12	10	20	7	23	7	22	0.25632	0.50128	0.699315	0.999913
A1CF	7	28	7	5	4	45	6	15	1	30	7	17	0.436255	0.665002	0.511636	0.999913
A2LD1	19	24	18	7	16	19	9	19	13	12	10	14	0.728996	0.837791	0.241136	0.999913
A2M	1	5	1	0	0	5	1	6	0	5	0	8	0.335332	0.581742	0.698354	0.999913
A2ML1	1	7	0	1	0	9	1	3	0	6	0	10	0.122462	0.320968	0.839402	0.999913
A4GALT	0	0	0	0	0	3	0	0	0	1	0	1	0.407082	0.642621	0.818374	0.999913
A4GNT	0	5	0	0	0	2	0	2	0	1	0	1	0.204663	0.441923	0.651772	0.999913
AAAS	555	293	562	277	506	433	551	363	609	334	879	541	0.457015	0.678921	0.735838	0.999913
AACS	388	441	332	398	399	405	322	433	383	375	592	638	0.754497	0.84699	0.629007	0.999913
AADAC	0	1	0	1	0	2	0	0	0	2	0	1	0.966607	0.981822	0.833674	0.999913
AADACL2	0	1	0	0	0	3	0	0	0	0	0	1	0.410857	0.645474	0.578939	0.999913
AADACL3	0	1	0	0	0	0	0	1	0	0	0	0	0.578695	0.762196	0.45129	0.999913
AADACL4	0	1	0	0	0	1	0	3	0	0	0	1	0.350179	0.594888	0.416494	0.999913
AADAT	551	449	661	290	768	652	528	485	605	510	767	636	0.253313	0.498075	0.322282	0.999913
AAGAB	1166	1002	957	883	1106	1058	1116	1085	1032	1038	1680	1544	0.315491	0.561099	0.96775	0.999913
AAK1	896	1145	956	1036	483	1096	621	846	370	944	918	1538	0.00708311	0.0373972	0.935024	0.999913
AAMP	2013	1715	2117	1692	2002	1922	1630	1873	2102	1515	2870	2705	0.55971	0.750792	0.810946	0.999913
AANAT	2	6	2	2	0	4	2	2	1	7	0	5	0.98224	0.988948	0.838366	0.999913
AAR2	616	606	784	575	715	736	556	588	631	567	771	913	0.262963	0.507763	0.523971	0.999913
AARD	0	1	0	0	0	2	0	1	0	1	0	1	0.354877	0.599475	0.798899	0.999913
AARS	4019	1673	2903	1995	3941	2147	2219	1479	3390	1704	4158	2288	0.551992	0.743812	0.97139	0.999913
AARS2	720	607	523	314	596	864	600	792	612	676	805	970	0.00036105	0.0030178	0.377393	0.999913
AARSD1	443	305	378	161	591	381	377	414	539	303	681	545	0.00672162	0.0358992	0.812249	0.999913
AASDH	113	102	228	138	70	123	66	77	48	126	114	167	1.50996e-07	2.88592e-06	0.527344	0.999913
AASDHPPT	1499	1244	1263	705	1440	1454	1297	1248	1123	1305	1980	1777	0.0139899	0.0645498	0.575277	0.999913
AASS	1302	1007	1032	396	675	906	1145	975	659	969	1818	1629	0.0461426	0.162669	0.663385	0.999913
AATF	1386	935	1572	905	1373	1008	991	842	1517	798	1997	1323	0.227469	0.470352	0.371746	0.999913
AATK	11	15	2	3	10	8	9	6	8	9	14	12	0.01822	0.0799105	0.825465	0.999913
ABAT	266	385	150	71	99	254	150	264	158	332	229	357	0.00561606	0.0309763	0.219289	0.999913
ABCA10	3	37	3	8	1	27	1	19	3	27	1	30	0.230005	0.473575	0.657192	0.999913
ABCA12	5	116	2	3	1	60	2	130	4	245	1	278	0.0872788	0.254844	0.0714633	0.999913
ABCA13	0	19	0	2	0	12	0	11	1	14	1	23	0.0254076	0.103027	0.34309	0.999913
ABCA3	845	1398	1406	1277	731	950	730	1066	891	1146	1137	1880	0.000738993	0.00566163	0.0689286	0.999913
ABCA4	1	14	0	2	0	20	0	16	0	8	1	26	0.0208688	0.0884261	0.809061	0.999913
ABCA5	270	805	125	548	152	801	147	433	125	782	222	1075	0.293255	0.53973	0.519199	0.999913
ABCA6	0	3	0	0	0	3	0	2	0	5	0	7	0.0981373	0.276493	0.501244	0.999913
ABCA7	305	889	92	284	382	875	215	1125	254	739	311	1324	2.68024e-07	4.84002e-06	0.295143	0.999913
ABCA8	0	3	0	2	0	2	0	8	0	1	1	5	0.658924	0.808488	0.829037	0.999913
ABCA9	0	8	0	2	0	9	0	6	0	11	0	10	0.222801	0.464596	0.740869	0.999913
ABCB1	0	7	0	1	0	6	0	5	0	6	0	7	0.220258	0.461886	0.959192	0.999913
ABCB10	714	373	571	354	640	495	550	404	400	385	916	591	0.732817	0.838751	0.299811	0.999913
ABCB11	0	1	0	1	0	6	0	4	0	11	0	8	0.305982	0.55297	0.490242	0.999913
ABCB4	0	4	0	0	0	3	0	4	0	2	0	2	0.139883	0.350077	0.603722	0.999913
ABCB5	0	2	0	0	0	2	0	0	0	5	0	3	0.191722	0.425303	0.35048	0.999913
ABCB6	836	1102	429	321	836	1793	897	1484	1031	1505	1244	1831	7.1959e-10	1.9993e-08	0.888295	0.999913
ABCB7	517	434	539	421	492	447	452	439	387	357	740	629	0.343111	0.589274	0.570645	0.999913
ABCB8	453	425	374	320	361	345	484	447	486	390	606	583	0.23933	0.483439	0.721083	0.999913
ABCB9	274	280	146	133	213	240	223	311	261	210	290	361	0.000228403	0.0020257	0.750706	0.999913
ABCC1	1966	1577	1592	1184	1500	1069	1272	984	1395	1127	2230	1728	0.530858	0.730701	0.262031	0.999913
ABCC10	277	524	230	312	186	525	247	511	269	486	304	710	0.0924531	0.2653	0.723157	0.999913
ABCC11	3	4	2	6	1	19	1	19	0	23	3	24	0.500591	0.712517	0.808844	0.999913
ABCC12	0	3	0	0	0	2	0	2	0	3	0	6	0.140424	0.350894	0.615351	0.999913
ABCC2	18	16	19	4	18	49	4	19	9	27	12	27	0.509548	0.718113	0.481116	0.999913
ABCC3	0	6	0	5	0	4	0	7	1	5	0	4	0.936923	0.964788	0.967328	0.999913
ABCC4	1006	532	991	507	497	306	888	321	708	461	1412	734	0.19794	0.43249	0.116374	0.999913
ABCC5	621	1059	529	684	529	1021	474	770	449	780	789	1374	0.434925	0.66393	0.977645	0.999913
ABCC6	58	64	50	19	47	95	38	56	25	59	38	77	0.135591	0.34344	0.0583512	0.999913
ABCC8	0	3	0	1	0	2	0	3	0	4	0	5	0.53066	0.730596	0.708542	0.999913
ABCC9	0	8	0	2	0	6	0	11	0	16	0	12	0.133136	0.339393	0.548956	0.999913
ABCD1	452	662	337	326	391	710	378	636	405	562	610	1007	0.00154312	0.0105356	0.827653	0.999913
ABCD2	1	2	2	1	1	4	0	1	1	2	0	2	0.689946	0.820465	0.828942	0.999913
ABCD3	1436	1091	1338	917	1076	1047	1086	1015	874	840	1917	1633	0.553397	0.74498	0.989508	0.999913
ABCD4	442	562	458	396	433	747	396	576	464	524	605	884	0.274756	0.519993	0.846885	0.999913
ABCE1	3283	1817	3869	2364	3523	2033	3058	1793	2180	1785	4643	2853	0.00687495	0.0365295	0.358393	0.999913
ABCF1	1537	1350	1219	1225	1465	1478	1175	1285	1483	1170	1952	2007	0.615386	0.777871	0.832358	0.999913
ABCF2	3407	3444	4109	2885	4138	3863	2896	3361	3565	3025	4488	4809	0.620185	0.779191	0.526186	0.999913
ABCF3	787	888	788	553	719	1051	589	904	825	793	1050	1383	0.165632	0.388793	0.604285	0.999913
ABCG1	0	2	0	0	0	4	0	3	0	2	0	6	0.129581	0.332712	0.957202	0.999913
ABCG2	65	104	21	47	71	98	76	92	61	128	109	173	2.9175e-06	4.21901e-05	0.412633	0.999913
ABCG4	183	286	43	58	90	296	115	284	140	305	174	377	1.31006e-14	6.03232e-13	0.339837	0.999913
ABCG5	0	2	1	1	0	1	0	2	0	1	0	3	0.407675	0.642642	0.970092	0.999913
ABCG8	0	2	0	0	0	7	0	3	0	1	0	4	0.126578	0.328006	0.450874	0.999913
ABHD1	4	9	3	5	2	12	3	4	2	3	6	7	0.886628	0.935689	0.649778	0.999913
ABHD10	901	877	727	600	992	1549	842	1040	920	1025	1282	1536	0.00425109	0.0246019	0.392871	0.999913
ABHD11	328	233	260	300	311	310	237	291	398	273	355	296	0.72454	0.834535	0.980776	0.999913
ABHD12	697	526	1039	882	611	619	577	577	671	509	905	836	1.93609e-06	2.89753e-05	0.860719	0.999913
ABHD12B	6	5	5	4	8	13	6	7	6	5	16	5	0.419355	0.652071	0.510696	0.999913
ABHD13	423	428	467	330	330	460	280	355	219	390	491	636	0.253269	0.498075	0.929386	0.999913
ABHD14A	104	88	98	73	107	113	97	124	141	119	136	151	0.209442	0.447572	0.691315	0.999913
ABHD14B	254	384	615	489	244	381	216	333	295	373	316	553	1.65662e-08	3.79947e-07	0.348443	0.999913
ABHD15	269	388	312	197	199	499	197	413	174	372	282	596	0.615892	0.777871	0.448135	0.999913
ABHD16A	476	513	392	402	351	563	363	562	344	449	580	765	0.527062	0.728294	0.7783	0.999913
ABHD16B	83	199	135	92	60	146	66	238	88	209	135	351	0.934906	0.963704	0.188775	0.999913
ABHD2	787	416	1154	1027	486	654	578	392	421	537	840	745	6.90892e-13	2.76418e-11	0.998597	0.999913
ABHD3	476	579	325	401	351	768	334	644	313	555	510	740	0.076901	0.233285	0.221061	0.999913
ABHD4	484	1261	151	226	360	1852	440	1336	431	1410	604	1963	0	0	0.867949	0.999913
ABHD5	476	379	478	414	420	517	363	381	380	474	657	759	0.5802	0.762741	0.311084	0.999913
ABHD6	325	319	238	117	298	310	245	248	250	264	378	426	0.00101395	0.00737785	0.969363	0.999913
ABHD8	102	119	76	119	69	171	68	129	88	85	109	195	0.996476	0.997655	0.708571	0.999913
ABI1	1187	1473	1371	1245	880	1463	892	1213	735	1232	1179	1849	0.0357311	0.134217	0.459711	0.999913
ABI2	1479	643	1821	1209	926	547	940	531	671	507	1805	870	5.71544e-09	1.41153e-07	0.808871	0.999913
ABI3	0	0	0	0	0	0	0	0	0	1	0	2	0.537423	0.734218	0.261575	0.999913
ABI3BP	5	12	7	6	3	23	1	14	1	16	4	18	0.883075	0.93391	0.735331	0.999913
ABL2	3077	6984	4362	5704	2156	5435	2090	4006	1323	5238	4030	10165	0.0189358	0.0822883	0.331355	0.999913
ABLIM1	932	879	1780	1030	1142	431	726	710	937	960	1377	1111	0.000928638	0.00684372	0.192171	0.999913
ABLIM2	11	22	6	0	5	28	12	17	12	25	14	20	0.00110925	0.00795657	0.881035	0.999913
ABLIM3	0	6	6	6	0	1	0	2	0	4	0	4	0.00323555	0.0195742	0.531057	0.999913
ABP1	0	2	0	1	0	2	0	3	0	1	0	6	0.663434	0.811831	0.95299	0.999913
ABR	1428	1260	1431	918	1134	967	1085	1013	1101	860	1871	1526	0.505591	0.716011	0.697815	0.999913
ABRA	0	1	0	1	1	4	2	3	0	3	1	2	0.364164	0.607425	0.382196	0.999913
ABRACL	483	541	951	787	507	708	478	456	520	478	778	858	1.08789e-06	1.7181e-05	0.839443	0.999913
ABT1	570	390	593	389	697	477	508	399	647	415	783	623	0.974246	0.985282	0.985323	0.999913
ABTB1	85	148	60	79	41	120	60	157	73	154	83	206	0.0911093	0.263169	0.314089	0.999913
ABTB2	312	518	210	159	284	471	237	463	288	495	369	736	2.98598e-06	4.30766e-05	0.471356	0.999913
ACAA1	580	623	504	469	475	612	473	600	618	500	814	966	0.338862	0.585103	0.295251	0.999913
ACAA2	871	635	1081	1161	556	791	588	602	650	613	1093	1135	3.02242e-07	5.38236e-06	0.222476	0.999913
ACACA	2964	994	2363	906	1643	654	2192	569	1253	691	3038	1067	0.195901	0.430573	0.895323	0.999913
ACACB	204	108	135	69	138	147	137	102	124	110	204	166	0.105514	0.289452	0.750385	0.999913
ACAD10	136	144	116	87	70	127	98	126	98	135	179	181	0.499617	0.711695	0.236765	0.999913
ACAD11	435	620	529	492	404	622	417	783	399	748	537	1092	0.988345	0.99259	0.86182	0.999913
ACAD8	420	542	515	495	389	699	392	644	385	514	575	901	0.509165	0.717941	0.563197	0.999913
ACAD9	511	404	492	338	462	439	486	376	491	329	634	508	0.981829	0.988859	0.487685	0.999913
ACADL	0	1	0	0	0	2	0	3	0	1	0	0	0.302789	0.550093	0.383905	0.999913
ACADM	690	642	882	921	536	689	516	442	431	527	925	886	3.12213e-06	4.48253e-05	0.720925	0.999913
ACADS	282	417	237	213	240	486	213	433	319	330	389	555	0.0112925	0.0543673	0.851032	0.999913
ACADSB	671	450	684	306	476	479	693	503	400	533	938	768	0.488136	0.704417	0.997477	0.999913
ACADVL	2816	4323	2600	1947	2633	3449	2512	4243	3209	3996	4319	6317	0.00253542	0.0159663	0.134374	0.999913
ACAN	0	7	0	0	0	7	0	10	0	3	0	6	0.0304687	0.118761	0.349624	0.999913
ACAP1	11	16	10	5	5	12	3	6	4	16	15	24	0.675309	0.820419	0.114492	0.999913
ACAP2	1536	1407	1585	1444	1089	1394	1095	1081	687	1362	1527	1798	0.00675062	0.0360199	0.529942	0.999913
ACAP3	377	550	206	239	210	447	316	567	268	338	506	804	0.00499064	0.0280962	0.8977	0.999913
ACAT1	2080	1578	1651	674	2107	1654	1948	1456	1919	1251	3326	2326	7.15639e-05	0.000732066	0.985372	0.999913
ACAT2	1391	888	861	527	892	1196	1453	1216	1228	1132	1887	1590	0.000645204	0.00503086	0.901868	0.999913
ACBD3	1156	2220	1054	1040	953	2291	843	2161	761	2272	1326	3311	0.0330214	0.126466	0.994683	0.999913
ACBD4	79	104	84	53	50	86	66	97	63	97	114	155	0.44998	0.674519	0.275973	0.999913
ACBD5	1029	1066	746	542	708	1559	730	1062	568	1086	1173	1655	0.00462333	0.026383	0.44934	0.999913
ACBD6	486	320	385	216	428	254	454	257	455	225	650	325	0.332418	0.578414	0.79426	0.999913
ACBD7	403	277	47	195	341	607	239	435	232	297	587	594	1.33115e-05	0.000165397	0.401788	0.999913
ACCS	44	65	30	51	27	76	35	85	33	90	52	129	0.190744	0.424213	0.472114	0.999913
ACCSL	0	3	1	0	0	1	0	0	0	0	0	4	0.562049	0.75252	0.619115	0.999913
ACD	611	349	568	487	624	513	500	532	717	433	820	591	0.615936	0.777871	0.888728	0.999913
ACE	117	154	120	162	56	112	93	237	70	218	153	238	0.548736	0.741948	0.67204	0.999913
ACE2	1	5	0	1	0	9	0	8	1	5	0	17	0.074866	0.228804	0.730153	0.999913
ACER1	1	3	3	1	0	5	0	4	2	1	0	4	0.568702	0.758007	0.975748	0.999913
ACER3	536	367	464	279	304	348	382	299	240	346	624	495	0.670547	0.816707	0.793463	0.999913
ACHE	114	381	45	141	63	389	50	346	56	292	93	432	8.57014e-05	0.000857205	0.578478	0.999913
ACIN1	2919	2161	3094	1955	2500	2177	2379	1987	2518	1801	3829	2887	0.273212	0.518927	0.964362	0.999913
ACLY	6929	4116	5995	4383	5322	3919	5345	3610	4422	3208	7806	5024	0.0643644	0.205428	0.399777	0.999913
ACMSD	5	4	6	7	9	4	5	9	4	5	5	10	0.668043	0.814758	0.487691	0.999913
ACN9	214	180	430	202	246	150	201	138	223	161	350	221	8.53784e-05	0.000854449	0.508269	0.999913
ACO2	1745	1476	855	512	1606	1351	1403	1295	1724	1282	2128	1893	8.22587e-10	2.26797e-08	0.661641	0.999913
ACOT1	7	2	12	7	4	28	2	18	10	23	8	28	0.926242	0.958664	0.370584	0.999913
ACOT11	18	33	8	11	28	37	15	42	16	25	17	33	0.00604719	0.033012	0.0700911	0.999913
ACOT12	0	0	0	1	0	3	0	2	0	1	0	2	0.922946	0.956853	0.669899	0.999913
ACOT13	469	400	352	277	402	453	470	395	312	380	699	590	0.0530795	0.179194	0.564815	0.999913
ACOT2	174	204	333	298	143	253	122	177	163	231	216	273	7.1879e-07	1.17968e-05	0.452794	0.999913
ACOT4	0	2	0	0	0	0	0	0	0	1	0	1	0.450222	0.674519	0.342424	0.999913
ACOT6	0	0	2	0	0	0	0	1	0	2	0	0	0.237165	0.480847	0.772465	0.999913
ACOT7	1684	716	1358	557	1539	783	1322	660	1702	539	2712	1025	0.219811	0.461083	0.524338	0.999913
ACOT8	115	132	98	77	78	128	109	127	107	108	147	176	0.193874	0.428336	0.889218	0.999913
ACOT9	372	494	562	720	327	353	361	545	419	506	564	811	0.000570884	0.00451392	0.226222	0.999913
ACOX1	1233	1665	767	865	769	1832	791	1413	751	1452	1395	2430	0.00390852	0.0228323	0.604156	0.999913
ACOX2	0	1	175	75	1	7	1	0	0	5	1	4	0	0	0.842532	0.999913
ACOX3	254	251	260	244	194	226	178	178	225	178	313	285	0.0681403	0.213952	0.554708	0.999913
ACOXL	1	3	0	2	0	3	2	4	0	3	0	2	0.613592	0.777527	0.300771	0.999913
ACP1	1262	883	1308	952	1198	1131	1217	1101	1002	800	1720	1401	0.423139	0.654943	0.147453	0.999913
ACP2	280	272	237	214	229	248	162	242	232	262	295	416	0.879093	0.931285	0.261957	0.999913
ACP5	0	9	1	10	0	13	0	9	0	12	0	12	0.441032	0.668339	0.982115	0.999913
ACP6	237	194	274	92	212	209	248	173	246	200	346	283	0.125066	0.325328	0.583604	0.999913
ACPL2	497	294	395	232	365	243	361	279	321	230	564	391	0.967013	0.982107	0.895935	0.999913
ACPP	1	1	0	0	0	4	0	0	0	0	0	5	0.202687	0.439395	0.988067	0.999913
ACPT	2	2	2	3	1	5	3	1	0	0	4	4	0.703082	0.823068	0.547682	0.999913
ACR	0	3	0	0	0	3	0	0	0	2	0	2	0.236114	0.480088	0.888274	0.999913
ACRBP	4	24	1	4	5	13	6	23	1	27	10	41	0.00193475	0.0127641	0.559402	0.999913
ACRC	11	20	6	6	25	39	12	36	6	28	17	25	0.0103147	0.0506381	0.032858	0.999913
ACRV1	11	5	17	8	17	17	13	14	2	14	17	23	0.868122	0.92486	0.301547	0.999913
ACSBG1	6	11	8	6	12	15	9	14	7	7	19	12	0.411738	0.646064	0.386448	0.999913
ACSBG2	4	8	11	30	3	16	4	7	6	13	7	13	0.00203784	0.0133174	0.662536	0.999913
ACSF2	224	344	82	142	172	444	169	476	214	410	184	394	0.000158938	0.00147882	0.512236	0.999913
ACSF3	84	88	82	63	75	85	83	122	102	90	112	172	0.223934	0.466009	0.630803	0.999913
ACSL1	1882	1072	1248	1078	1656	1147	1452	1047	1453	1075	2350	1644	0.544727	0.739055	0.833886	0.999913
ACSL3	2208	844	1488	944	1131	1069	1368	763	788	744	2244	1289	0.45597	0.677725	0.700566	0.999913
ACSL4	1979	1721	2939	2140	1458	1312	1403	1199	1000	1355	2280	1965	3.70256e-09	9.44206e-08	0.958551	0.999913
ACSL5	2	19	91	398	2	36	2	5	2	25	4	44	0	0	0.577152	0.999913
ACSL6	0	8	0	1	0	17	0	6	0	13	1	13	0.0364216	0.136157	0.759461	0.999913
ACSM1	0	0	0	2	1	1	0	3	0	1	0	0	0.76174	0.852248	0.239088	0.999913
ACSM2A	0	0	0	0	0	1	0	0	0	2	0	1	0.450142	0.674519	0.625614	0.999913
ACSM2B	0	0	0	0	0	2	0	2	0	3	0	2	0.255404	0.50043	0.919805	0.999913
ACSM3	5	7	1	11	7	2	1	6	2	5	1	8	0.526215	0.728151	0.615136	0.999913
ACSM4	0	3	5	18	0	3	0	2	1	27	0	7	0.0569077	0.18894	0.172711	0.999913
ACSM5	0	1	0	0	0	3	0	4	0	3	0	2	0.168764	0.392715	0.732175	0.999913
ACSS1	84	38	223	173	3	3	0	2	0	0	5	1	1.55431e-15	7.79494e-14	0.476144	0.999913
ACSS2	489	383	481	503	221	424	251	326	231	297	605	628	0.00432357	0.0249572	0.308179	0.999913
ACSS3	0	3	0	0	0	4	0	2	0	1	0	11	0.102237	0.283531	0.718391	0.999913
ACTA1	7	14	5	5	3	12	6	11	13	11	10	27	0.158893	0.378602	0.175569	0.999913
ACTA2	8	186	54	69	17	226	13	249	38	268	41	305	0.908547	0.948645	0.0931155	0.999913
ACTB	35844	16930	42612	16709	35447	16597	27101	15384	42502	12775	50360	22297	0.194781	0.429495	0.618291	0.999913
ACTBL2	12	52	0	0	0	1	0	2	4	8	9	14	0.0581415	0.191578	0.000989857	0.360611
ACTC1	0	0	0	0	0	3	0	0	0	2	0	1	0.357234	0.601859	0.997631	0.999913
ACTG1	30674	19970	34949	26858	27011	28301	19621	18503	26558	16328	38919	29361	0.00118229	0.00842341	0.808004	0.999913
ACTG2	0	4	0	2	0	5	0	3	0	0	0	3	0.928685	0.960007	0.372181	0.999913
ACTL10	2	5	5	3	2	5	6	3	2	9	4	8	0.95192	0.973605	0.834435	0.999913
ACTL6A	1342	558	1239	640	1129	759	1170	689	1091	620	1864	878	0.604567	0.771466	0.670725	0.999913
ACTL6B	0	3	1	0	0	3	0	3	1	4	0	2	0.79413	0.875644	0.725835	0.999913
ACTL8	12	5	80	25	27	7	13	5	29	3	20	6	2.44704e-09	6.38501e-08	0.749784	0.999913
ACTL9	0	0	0	0	0	0	0	0	0	0	0	2	0.639689	0.792905	0.396455	0.999913
ACTN1	3850	2852	6826	5215	3313	2516	2471	2314	3207	2182	4959	3890	2.33147e-15	1.15002e-13	0.32835	0.999913
ACTN2	0	3	0	1	0	1	1	7	0	3	0	5	0.373527	0.615953	0.54267	0.999913
ACTN4	3119	2590	4101	2961	2786	2640	2212	2457	2848	2232	4143	3767	0.00177668	0.0118472	0.517107	0.999913
ACTR10	539	648	502	512	385	601	415	711	444	584	617	958	0.981707	0.988832	0.75756	0.999913
ACTR1A	2148	1846	2050	1786	1694	1924	1837	1703	1754	1590	2940	3000	0.472423	0.690028	0.544421	0.999913
ACTR1B	615	780	434	333	556	642	529	691	520	550	941	1185	0.00019663	0.00178344	0.539885	0.999913
ACTR2	5265	4360	7377	6638	4126	4420	1996	1941	1539	1934	5574	5146	0.000117726	0.00113466	0.736893	0.999913
ACTR3	3343	2592	4659	4800	2651	2230	2475	2258	2380	2054	4203	3573	7.26441e-12	2.60535e-10	0.702387	0.999913
ACTR3B	452	322	333	238	436	222	377	279	311	209	568	337	0.624132	0.782403	0.297025	0.999913
ACTR3C	18	14	30	32	16	23	27	22	24	19	30	20	0.0473978	0.165867	0.651372	0.999913
ACTR5	261	175	433	226	242	197	192	150	214	162	338	258	5.61327e-05	0.000594237	0.802027	0.999913
ACTR6	677	465	484	342	591	587	494	515	457	477	749	686	0.0912134	0.263258	0.33252	0.999913
ACTR8	415	400	401	270	255	445	264	310	229	322	412	563	0.591674	0.766693	0.93473	0.999913
ACTRT1	0	0	0	1	0	0	0	2	0	0	0	3	0.86827	0.92488	0.983837	0.999913
ACTRT2	0	1	0	0	0	0	0	0	0	0	0	0	0.698547	0.821084	NA	NA
ACTRT3	48	47	53	85	34	50	36	60	44	77	44	59	0.0163929	0.0733442	0.736074	0.999913
ACVR1	191	241	307	238	150	222	135	205	126	224	226	377	0.000877766	0.0065411	0.507557	0.999913
ACVR1B	591	468	469	391	472	470	431	514	368	436	631	726	0.728979	0.837791	0.55906	0.999913
ACVR1C	3	13	2	3	1	7	1	4	0	15	0	15	0.583363	0.762741	0.569864	0.999913
ACVR2A	167	177	126	99	110	174	122	174	109	189	164	305	0.0966667	0.273088	0.580294	0.999913
ACVR2B	922	445	522	180	564	484	526	374	261	481	803	714	0.0629805	0.20241	0.677871	0.999913
ACVRL1	0	0	1	0	0	1	0	6	0	1	0	1	0.493785	0.708184	0.394604	0.999913
ACY1	282	409	448	576	309	489	254	516	279	459	370	630	0.000658025	0.0051087	0.57537	0.999913
ACY3	3	9	0	4	8	15	3	11	10	29	6	10	0.0433639	0.155275	0.569766	0.999913
ACYP1	120	73	141	189	86	124	116	89	102	74	162	94	1.40103e-05	0.000173482	0.29498	0.999913
ACYP2	29	26	25	21	20	80	24	22	28	31	30	40	0.59659	0.770849	0.631485	0.999913
ADA	381	332	240	223	318	329	237	294	261	235	399	355	0.184116	0.415235	0.292726	0.999913
ADAD1	0	0	0	0	0	0	0	1	0	2	0	0	0.488548	0.70448	0.772465	0.999913
ADAD2	0	3	0	0	1	2	0	1	0	1	0	2	0.197699	0.432343	0.561661	0.999913
ADAL	2	1	0	0	0	7	0	3	1	4	0	2	0.0604584	0.196834	0.923072	0.999913
ADAM10	1603	1062	1394	981	1089	994	910	608	702	911	1565	1293	0.0938482	0.267475	0.805579	0.999913
ADAM11	33	25	12	62	16	55	18	54	25	46	35	51	0.637484	0.792905	0.937438	0.999913
ADAM12	1	7	0	2	0	4	0	6	0	8	0	19	0.209813	0.447887	0.303046	0.999913
ADAM15	2017	1318	1370	1349	1675	1439	2208	1557	2745	1339	3395	2126	0.307915	0.554868	0.344737	0.999913
ADAM17	723	686	852	651	463	649	380	469	321	586	695	907	0.00047605	0.00384781	0.697491	0.999913
ADAM18	0	0	0	0	0	2	0	0	0	2	0	0	0.438782	0.666662	0.958554	0.999913
ADAM19	0	6	0	1	0	4	0	12	0	12	0	7	0.140953	0.351713	0.933239	0.999913
ADAM2	0	0	0	0	0	1	0	0	0	1	0	1	0.522103	0.725843	0.805393	0.999913
ADAM20	1	2	2	5	0	4	0	1	0	1	2	3	0.156242	0.375343	0.725273	0.999913
ADAM21	14	22	5	9	13	17	9	5	9	19	9	17	0.191773	0.425364	0.924245	0.999913
ADAM22	314	221	188	98	191	184	201	148	134	182	359	256	0.0443314	0.158017	0.74392	0.999913
ADAM23	0	3	0	1	0	3	1	1	0	4	2	4	0.375047	0.617216	0.584496	0.999913
ADAM28	0	1	0	2	0	0	0	0	0	3	0	3	0.686291	0.820465	0.10051	0.999913
ADAM29	0	1	0	0	0	1	0	4	0	3	0	2	0.203311	0.440007	0.932206	0.999913
ADAM30	0	0	0	0	6	11	0	0	0	1	0	0	0.214042	0.453685	0.0725679	0.999913
ADAM32	2	1	0	1	1	4	3	1	0	0	2	4	0.362904	0.606546	0.429105	0.999913
ADAM33	0	1	0	1	0	2	0	2	0	1	0	4	0.833766	0.902599	0.999539	0.999913
ADAM7	0	0	0	2	0	3	0	2	0	4	0	5	0.979852	0.988305	0.695834	0.999913
ADAM8	15	38	7	2	18	39	17	35	23	52	55	94	9.50546e-06	0.000121287	0.0143877	0.999913
ADAM9	2046	1266	1931	2021	1387	596	1167	522	1212	797	2630	1460	7.50545e-06	9.82749e-05	0.00711573	0.999913
ADAMDEC1	0	0	0	0	0	1	0	0	0	0	0	1	0.617881	0.777871	0.941844	0.999913
ADAMTS1	0	0	0	0	1	0	0	1	0	2	1	2	0.252978	0.497842	0.689276	0.999913
ADAMTS10	0	1	0	1	0	2	0	1	0	4	0	2	0.800145	0.88012	0.652027	0.999913
ADAMTS12	0	4	0	1	0	1	0	8	0	8	0	5	0.300921	0.548282	0.823206	0.999913
ADAMTS14	0	4	0	1	0	2	0	6	0	1	0	4	0.523472	0.726397	0.558586	0.999913
ADAMTS15	0	0	0	2	0	1	0	1	0	1	0	5	0.710849	0.824198	0.610481	0.999913
ADAMTS16	9	29	104	99	10	17	0	9	6	24	23	75	2.33147e-15	1.15002e-13	0.0363802	0.999913
ADAMTS17	35	29	2	2	33	35	24	31	22	40	40	30	6.28077e-10	1.75862e-08	0.698769	0.999913
ADAMTS18	0	3	0	0	0	1	0	8	0	6	0	8	0.0557138	0.18634	0.777936	0.999913
ADAMTS19	0	3	0	0	0	6	0	2	0	4	0	2	0.117693	0.312344	0.786093	0.999913
ADAMTS2	0	16	1	0	0	16	0	16	1	9	0	14	0.0379564	0.140322	0.598001	0.999913
ADAMTS20	0	4	0	0	0	4	0	1	0	4	0	4	0.122781	0.321202	0.749854	0.999913
ADAMTS3	0	5	0	3	0	4	0	3	0	4	0	9	0.850989	0.913826	0.663294	0.999913
ADAMTS4	3	5	0	1	0	2	0	6	1	5	1	9	0.129127	0.332115	0.363505	0.999913
ADAMTS5	0	1	0	0	0	1	0	1	0	1	0	8	0.241473	0.485915	0.410523	0.999913
ADAMTS6	18	10	67	110	2	11	12	15	5	14	5	15	0	0	0.540694	0.999913
ADAMTS7	0	0	0	0	0	1	0	3	0	5	0	2	0.213626	0.453216	0.702858	0.999913
ADAMTS8	0	1	0	0	0	1	1	3	0	2	0	1	0.207171	0.445149	0.473213	0.999913
ADAMTS9	121	83	82	52	78	125	64	77	47	94	100	110	0.333725	0.579752	0.330828	0.999913
ADAMTSL3	0	5	0	2	0	6	0	8	0	5	0	6	0.447284	0.672515	0.665522	0.999913
ADAMTSL4	112	144	40	96	42	182	67	106	37	108	64	186	0.159443	0.37966	0.230242	0.999913
ADAMTSL5	71	136	72	146	37	97	45	125	50	89	72	174	0.0232006	0.0963115	0.657238	0.999913
ADAP1	309	255	209	130	288	267	233	261	301	201	417	341	0.00227219	0.0146154	0.930731	0.999913
ADAP2	0	4	1	2	2	7	3	14	1	12	0	8	0.269399	0.515602	0.302418	0.999913
ADAR	7001	6580	6183	4792	5287	7497	5188	6106	4093	5827	8029	10086	0.706027	0.823068	0.594376	0.999913
ADARB1	494	459	297	239	428	467	338	382	348	402	594	610	0.00218386	0.0141432	0.967422	0.999913
ADARB2	0	1	0	0	0	1	0	2	0	2	0	5	0.225143	0.467305	0.660617	0.999913
ADAT1	290	366	369	443	206	463	243	382	146	397	327	665	0.00481218	0.0272791	0.606668	0.999913
ADAT2	477	321	445	258	452	283	406	305	343	290	601	423	0.981626	0.988832	0.663347	0.999913
ADAT3	1	2	0	0	0	0	2	4	0	2	3	2	0.0762997	0.231872	0.942795	0.999913
ADC	65	75	29	21	34	91	46	67	45	61	57	85	0.000557307	0.00441699	0.589053	0.999913
ADCK1	73	139	94	43	104	102	99	94	115	96	89	119	0.131225	0.335592	0.596671	0.999913
ADCK2	726	431	622	778	554	574	650	564	649	434	1075	865	0.0238276	0.0982801	0.689921	0.999913
ADCK3	608	1216	324	321	884	1578	584	1521	844	1348	806	1886	2.23993e-10	6.62196e-09	0.537994	0.999913
ADCK4	246	175	194	97	219	192	207	160	245	138	332	256	0.0301048	0.1177	0.847114	0.999913
ADCK5	126	160	145	130	95	207	105	216	111	180	146	273	0.933312	0.962666	0.854224	0.999913
ADCY1	0	6	0	2	0	8	0	5	0	14	0	7	0.286005	0.531726	0.597683	0.999913
ADCY10	0	0	0	2	0	2	0	3	0	2	2	3	0.91747	0.953923	0.634642	0.999913
ADCY2	0	2	0	2	0	1	0	0	0	2	0	5	0.820413	0.89372	0.32205	0.999913
ADCY3	1284	788	1194	383	958	722	1023	659	1047	698	1747	1190	0.0587758	0.193243	0.19315	0.999913
ADCY4	0	2	0	1	0	1	0	1	0	2	0	3	0.870878	0.926836	0.655504	0.999913
ADCY5	2	13	5	2	3	21	0	16	2	24	4	30	0.285959	0.531716	0.447208	0.999913
ADCY6	1072	1443	776	995	747	1356	720	1329	700	1191	1223	2011	0.274979	0.519993	0.802996	0.999913
ADCY7	1161	851	1287	725	665	630	798	752	687	673	1130	1110	0.0136412	0.0632654	0.716868	0.999913
ADCY8	0	8	1	2	0	6	0	7	0	7	0	7	0.907913	0.948368	0.958884	0.999913
ADCY9	526	573	326	294	376	464	401	451	333	504	584	689	0.0103166	0.0506381	0.790533	0.999913
ADCYAP1	0	1	0	0	0	1	0	1	0	1	0	2	0.363218	0.606903	0.907387	0.999913
ADCYAP1R1	0	3	14	29	0	2	0	3	0	2	1	11	5.88159e-10	1.65715e-08	0.350824	0.999913
ADD1	1991	1468	1877	1297	1683	1522	1625	1431	1746	1428	2428	2068	0.819753	0.893283	0.809897	0.999913
ADD2	0	3	0	1	0	10	0	7	0	9	0	11	0.12998	0.333503	0.953474	0.999913
ADD3	817	572	210	280	505	689	719	507	406	522	1044	775	1.29464e-06	1.99732e-05	0.622189	0.999913
ADGB	0	3	0	0	0	4	0	5	0	4	0	2	0.104082	0.286922	0.671147	0.999913
ADH1A	0	1	0	1	0	1	0	1	0	3	0	0	0.993921	0.99607	0.806161	0.999913
ADH1B	0	1	0	0	0	0	0	1	0	1	0	2	0.406798	0.642621	0.704266	0.999913
ADH1C	0	0	0	1	0	1	0	3	0	1	0	2	0.97378	0.985272	0.766603	0.999913
ADH4	0	2	1	1	0	7	0	5	0	1	0	3	0.737278	0.838751	0.262998	0.999913
ADH5	2561	2136	1720	1318	2164	2609	1948	2133	2143	2090	3378	3086	0.00263644	0.0165055	0.924224	0.999913
ADH6	0	9	4	1	0	11	1	10	2	1	3	7	0.98516	0.990542	0.574339	0.999913
ADH7	0	0	0	0	0	2	0	1	0	0	0	2	0.418124	0.651321	0.739541	0.999913
ADHFE1	15	73	3	7	15	53	18	75	34	80	51	90	1.8495e-08	4.20435e-07	0.0604264	0.999913
ADI1	626	528	531	652	550	781	645	686	829	589	1141	903	0.722731	0.8334	0.448642	0.999913
ADIG	0	0	0	1	0	0	0	0	0	2	0	0	0.666024	0.812875	0.298183	0.999913
ADIPOQ	0	4	0	1	1	4	0	1	0	5	0	4	0.402873	0.640508	0.965449	0.999913
ADIPOR1	1904	1912	1319	1658	1666	2242	1443	2044	1659	1900	2581	3114	0.120865	0.318183	0.647485	0.999913
ADIPOR2	1663	1100	1440	1071	1243	1191	1410	1203	971	954	1855	1676	0.507354	0.717336	0.203335	0.999913
ADK	407	192	717	205	288	124	339	97	355	125	594	202	7.83947e-07	1.27615e-05	0.0846149	0.999913
ADM	359	329	46	106	326	484	224	269	311	296	467	448	2.22045e-16	1.18626e-14	0.965398	0.999913
ADM2	0	1	0	0	0	0	0	0	0	3	0	3	0.327173	0.573095	0.10051	0.999913
ADNP	2468	1639	3862	1805	1781	1631	1682	1406	1364	1362	2347	2303	3.16743e-07	5.62945e-06	0.502433	0.999913
ADNP2	1643	1182	1525	1058	1240	1425	1133	1187	918	1183	1620	1833	0.439411	0.667118	0.396745	0.999913
ADO	595	513	486	381	495	637	463	597	497	534	706	800	0.152799	0.369408	0.797523	0.999913
ADORA1	185	184	110	82	152	276	179	146	169	117	242	233	0.00226024	0.0145612	0.269391	0.999913
ADORA2A	34	46	6	4	15	56	20	58	24	49	47	92	4.41174e-09	1.10934e-07	0.284199	0.999913
ADORA2B	538	897	489	430	488	673	372	664	499	547	730	967	0.16261	0.384557	0.640458	0.999913
ADORA3	0	3	0	1	0	1	0	2	0	1	0	5	0.741782	0.838889	0.776959	0.999913
ADPGK	840	798	702	659	859	837	681	733	809	773	1060	1078	0.444639	0.670795	0.926736	0.999913
ADPRH	10	12	106	163	0	7	44	61	42	79	26	42	5.68428e-05	0.000600938	0.561787	0.999913
ADPRHL1	23	58	37	43	17	58	14	64	22	76	32	77	0.421682	0.653747	0.337124	0.999913
ADPRHL2	447	459	424	386	468	559	334	536	437	478	568	779	0.466735	0.685687	0.979203	0.999913
ADPRM	104	139	112	110	80	248	66	127	71	153	103	236	0.830221	0.90044	0.713466	0.999913
ADRA1A	0	1	1	0	0	2	0	2	0	2	0	4	0.699978	0.822129	0.869628	0.999913
ADRA1B	0	1	0	0	0	0	0	0	0	2	0	2	0.405987	0.641906	0.179655	0.999913
ADRA1D	0	0	0	0	0	1	0	2	0	0	0	1	0.452038	0.675114	0.541903	0.999913
ADRA2A	0	3	1	0	0	1	0	3	1	0	0	3	0.983536	0.989859	0.906939	0.999913
ADRA2B	0	0	0	0	0	0	0	1	0	1	0	0	0.572092	0.758968	0.996935	0.999913
ADRA2C	188	153	17	18	146	145	80	150	128	108	171	158	1.11022e-16	6.05711e-15	0.551287	0.999913
ADRB1	7	10	1	4	3	13	4	8	9	4	6	3	0.139303	0.34916	0.530868	0.999913
ADRB2	0	0	0	0	1	1	0	2	0	5	0	3	0.158784	0.37849	0.900089	0.999913
ADRB3	0	0	0	0	0	0	0	1	0	0	0	0	0.690541	0.820465	0.45129	0.999913
ADRBK1	1794	1105	1060	757	1266	1170	1353	1158	1527	1035	2049	1568	0.00851658	0.0434001	0.741064	0.999913
ADRBK2	239	215	250	208	204	200	159	175	116	193	263	273	0.0586373	0.192894	0.607594	0.999913
ADRM1	2052	1531	2118	1245	1886	1994	1645	1534	2360	1364	2996	2410	0.608798	0.774846	0.514002	0.999913
ADSL	1555	877	2297	1358	1304	730	1385	886	1585	770	2063	1178	4.01218e-07	6.99954e-06	0.517727	0.999913
ADSS	1133	643	921	742	1042	667	981	669	920	693	1373	839	0.453954	0.676796	0.681752	0.999913
ADSSL1	8	33	6	16	2	36	4	50	4	16	8	40	0.61867	0.778276	0.396321	0.999913
ADTRP	1	3	2804	639	0	1	2	0	0	2	1	2	0	0	0.875615	0.999913
AEBP1	0	6	1	2	0	4	1	5	2	4	3	6	0.584769	0.762741	0.550799	0.999913
AEBP2	317	269	300	174	282	230	247	229	214	214	390	341	0.759113	0.849995	0.768012	0.999913
AEN	1219	2235	1518	1183	1844	3010	1183	2451	1640	2450	1846	3730	0.0230058	0.0956131	0.763383	0.999913
AES	2195	1691	2083	1573	1614	1674	1817	1745	1778	1302	2899	2531	0.457004	0.678921	0.931492	0.999913
AFAP1	624	412	281	219	446	292	443	254	352	287	649	482	0.00395406	0.0230684	0.792113	0.999913
AFAP1L1	0	0	1	1	0	5	0	4	2	2	0	5	0.931515	0.961568	0.796846	0.999913
AFAP1L2	1	16	0	1	0	9	0	26	1	31	0	20	0.0287006	0.113516	0.539048	0.999913
AFF1	1106	1511	1230	1321	771	1356	772	1037	474	1325	1159	1914	0.00924095	0.0462922	0.845452	0.999913
AFF2	0	4	0	6	0	5	0	7	0	7	0	13	0.886543	0.935689	0.675833	0.999913
AFF3	0	10	326	197	0	14	0	15	0	7	0	23	0	0	0.763024	0.999913
AFF4	2022	2691	1834	2235	1036	2493	1242	1557	599	2035	1878	3488	0.110779	0.29938	0.87667	0.999913
AFG3L2	2865	1570	2269	1344	2515	1717	2149	1566	2365	1411	3235	2225	0.60215	0.771402	0.709207	0.999913
AFM	0	0	0	0	0	1	0	0	0	0	0	1	0.617881	0.777871	0.941844	0.999913
AFMID	181	161	209	103	270	201	139	190	146	129	179	216	0.718412	0.830185	0.0803181	0.999913
AFP	0	1	0	1	0	4	0	2	0	0	0	4	0.791746	0.873971	0.638876	0.999913
AFTPH	749	782	816	672	543	757	577	664	470	643	954	1099	0.136414	0.345137	0.866146	0.999913
AGA	110	110	191	104	126	180	71	112	72	118	112	178	0.01718	0.0761095	0.205911	0.999913
AGAP1	1098	451	517	186	501	245	799	293	633	325	1215	526	0.0302574	0.118155	0.297807	0.999913
AGAP10	61	71	100	48	55	33	29	97	28	35	41	70	0.133487	0.339736	0.321493	0.999913
AGAP11	19	23	13	28	12	42	11	38	14	36	18	39	0.873207	0.928569	0.821007	0.999913
AGAP2	170	146	188	140	141	193	114	165	190	180	165	256	0.601716	0.771402	0.463151	0.999913
AGAP3	1150	1083	887	606	1034	989	921	1001	1093	856	1368	1433	0.0203271	0.0867842	0.957656	0.999913
AGAP4	95	76	75	78	116	96	62	79	66	72	114	96	0.978066	0.987516	0.25635	0.999913
AGAP5	134	189	122	71	104	172	106	149	86	172	135	247	0.0811478	0.242447	0.908119	0.999913
AGAP6	437	498	378	304	417	396	305	456	386	445	518	669	0.210285	0.448521	0.542355	0.999913
AGAP7	23	13	15	13	20	46	24	26	37	29	12	58	0.141653	0.352583	0.941589	0.999913
AGAP8	2	3	0	1	0	2	2	5	2	3	3	2	0.190782	0.424213	0.953825	0.999913
AGAP9	208	278	114	112	159	274	169	160	168	304	260	430	0.000618997	0.00485808	0.0663937	0.999913
AGBL1	0	0	0	0	0	5	0	2	0	3	0	3	0.177794	0.406661	0.842976	0.999913
AGBL2	3	7	11	23	1	21	1	8	1	11	6	6	0.0012814	0.00904716	0.934334	0.999913
AGBL3	8	14	21	36	16	21	7	19	11	10	19	17	0.00324977	0.019647	0.414759	0.999913
AGBL4	0	2	0	0	0	2	0	4	0	1	0	4	0.179285	0.408846	0.751694	0.999913
AGBL5	523	499	568	386	379	619	438	563	448	499	880	892	0.682066	0.820465	0.273863	0.999913
AGER	63	47	64	44	39	45	47	49	46	44	98	103	0.736528	0.838751	0.155242	0.999913
AGFG1	1384	1007	1472	981	1151	863	1100	796	888	845	1721	1479	0.0505151	0.173233	0.711774	0.999913
AGFG2	209	100	171	117	170	163	119	120	164	99	268	220	0.931859	0.961735	0.634243	0.999913
AGGF1	583	547	669	374	444	609	412	428	328	474	678	745	0.346975	0.592414	0.753037	0.999913
AGK	1009	777	917	689	907	611	950	682	850	599	1297	824	0.478068	0.695751	0.544449	0.999913
AGL	1091	985	1018	694	737	964	995	823	409	811	1359	1479	0.936719	0.964732	0.583085	0.999913
AGMAT	306	300	415	367	426	386	326	373	526	421	383	375	0.575599	0.761936	0.987213	0.999913
AGMO	0	0	0	0	0	0	0	2	0	5	0	3	0.274346	0.51996	0.377548	0.999913
AGPAT1	1054	1086	1080	1618	817	1104	807	1262	998	957	1452	1674	0.0026273	0.0164757	0.52154	0.999913
AGPAT3	866	721	1121	782	748	591	778	624	847	641	1338	1002	0.0108755	0.0527625	0.176504	0.999913
AGPAT4	84	72	18	18	21	56	66	66	64	77	70	86	9.96905e-05	0.000982833	0.453993	0.999913
AGPAT5	674	526	1749	944	729	506	564	489	618	695	813	643	1.22125e-15	6.19361e-14	0.743169	0.999913
AGPAT6	1944	2864	1956	2122	1709	2944	1567	3025	1711	2917	2347	4639	0.600757	0.771402	0.662494	0.999913
AGPAT9	542	375	59	71	644	344	352	292	546	368	893	621	5.66214e-15	2.69686e-13	0.177586	0.999913
AGPHD1	33	31	19	12	22	23	25	30	26	23	41	33	0.0748073	0.228703	0.946996	0.999913
AGPS	1241	761	1879	1122	811	482	1005	487	767	597	1665	1103	3.37518e-09	8.65623e-08	0.128901	0.999913
AGR2	0	1	0	0	0	1	1	0	0	1	0	2	0.3062	0.553218	0.875601	0.999913
AGR3	0	0	0	0	0	1	0	1	0	0	0	0	0.585358	0.762741	0.303364	0.999913
AGRN	2320	5812	874	1321	1934	4910	1777	3508	2003	3810	3259	7550	4.64472e-09	1.16305e-07	0.214549	0.999913
AGRP	2	1	0	2	0	2	2	1	0	2	2	2	0.818744	0.892833	0.961402	0.999913
AGT	0	0	0	1	0	5	0	2	0	4	1	2	0.552046	0.743829	0.827494	0.999913
AGTR1	0	0	0	0	0	1	0	1	0	0	0	1	0.523321	0.726267	0.70861	0.999913
AGTR2	0	3	0	0	0	2	0	1	0	1	0	2	0.261047	0.505866	0.933009	0.999913
AGTRAP	361	421	398	263	340	568	327	448	411	452	461	687	0.16686	0.389887	0.823456	0.999913
AGXT	0	4	0	0	0	0	0	3	0	9	0	4	0.151734	0.368042	0.310704	0.999913
AGXT2	0	1	1	1	0	3	0	1	6	4	0	3	0.702803	0.823068	0.145038	0.999913
AGXT2L1	0	1	0	1	0	2	0	2	0	1	0	2	0.919156	0.955045	0.782706	0.999913
AGXT2L2	135	239	94	80	64	120	53	168	66	156	106	240	0.404677	0.641073	0.310486	0.999913
AHCTF1	2489	1462	2290	1376	1793	1383	1644	999	1181	1295	2576	1931	0.0633328	0.203324	0.984212	0.999913
AHCY	3889	3782	4224	3994	4337	4306	3286	3215	3964	3042	5466	5182	0.14538	0.358159	0.769827	0.999913
AHCYL1	2543	1906	2307	2002	1989	2244	1743	1808	1481	1679	2955	2673	0.129443	0.332546	0.440151	0.999913
AHCYL2	328	478	263	242	227	449	267	347	213	377	399	649	0.0872514	0.254805	0.741878	0.999913
AHDC1	251	342	165	227	209	419	175	365	196	298	228	514	0.0486575	0.169019	0.352532	0.999913
AHI1	614	384	581	352	403	372	433	247	264	303	595	404	0.0542033	0.182475	0.327271	0.999913
AHNAK	14223	16552	25406	16510	7329	12183	8388	8741	3822	13065	11688	18629	2.21847e-06	3.28465e-05	0.925959	0.999913
AHNAK2	53	776	166	433	22	474	22	403	39	547	64	991	0.00179872	0.0119808	0.000398452	0.18904
AHR	0	1	0	2	0	1	0	6	1	8	0	1	0.696854	0.821084	0.57593	0.999913
AHRR	36	96	27	10	20	92	14	55	39	82	65	228	0.0411964	0.149476	0.0166878	0.999913
AHSA1	3331	2255	3483	2659	2979	2434	2955	2668	4175	2366	5369	3575	0.437889	0.666148	0.160743	0.999913
AHSA2	644	1016	590	674	448	1117	547	1060	416	850	801	1343	0.485055	0.701417	0.353235	0.999913
AHSG	0	0	0	0	0	1	0	1	0	1	0	1	0.451088	0.674727	0.958344	0.999913
AHSP	0	0	0	1	0	1	0	1	0	1	0	3	0.937365	0.964913	0.794114	0.999913
AICDA	0	1	0	1	0	1	0	1	0	0	0	1	0.817716	0.89209	0.70861	0.999913
AIDA	1199	884	1533	1543	1051	1149	993	876	1049	899	1726	1429	1.20479e-05	0.00015069	0.724312	0.999913
AIF1	0	0	0	0	0	3	0	0	0	1	0	1	0.407082	0.642621	0.818374	0.999913
AIFM1	1469	1075	1242	962	1228	1162	1240	1046	1229	725	1955	1490	0.948235	0.971768	0.473995	0.999913
AIFM2	834	921	520	537	831	1101	669	909	882	960	1211	1453	8.17752e-05	0.000820669	0.419965	0.999913
AIFM3	18	32	1	2	11	41	5	15	13	33	8	30	1.51528e-05	0.000185334	0.831073	0.999913
AIG1	286	163	208	155	258	175	241	145	314	129	476	259	0.407002	0.642621	0.264443	0.999913
AIM1	22	25	22	16	11	31	15	33	6	41	17	40	0.993409	0.995898	0.758707	0.999913
AIM1L	0	1	1	1	1	2	0	10	0	4	0	10	0.932844	0.962404	0.62625	0.999913
AIM2	0	2	0	1	0	1	0	0	0	1	0	1	0.89588	0.941205	0.805393	0.999913
AIMP1	911	722	842	658	997	897	722	707	823	719	1248	1101	0.748094	0.843017	0.817705	0.999913
AIMP2	419	263	331	271	465	311	293	260	492	240	561	397	0.770783	0.859321	0.751207	0.999913
AIP	516	383	493	372	399	436	366	355	531	398	647	584	0.615761	0.777871	0.155946	0.999913
AIPL1	0	0	0	0	0	0	0	1	0	1	0	2	0.462994	0.682699	0.704266	0.999913
AIRE	0	0	0	0	0	1	0	0	0	0	0	2	0.549434	0.741948	0.872885	0.999913
AJAP1	0	1	0	0	0	0	0	2	0	1	0	1	0.390756	0.630844	0.93565	0.999913
AJUBA	1171	1109	463	394	778	1554	676	798	710	811	1227	1514	1.65287e-05	0.000199467	0.740544	0.999913
AK2	4295	2253	3797	2218	4537	2334	3702	1965	3992	1786	6074	2957	0.63803	0.792905	0.706572	0.999913
AK4	1781	1407	1534	1298	1408	1014	1364	999	1264	1037	2149	1877	0.195344	0.430099	0.379321	0.999913
AK5	1	2	0	1	0	4	0	3	0	1	1	1	0.542843	0.737904	0.693918	0.999913
AK7	3	3	38	12	2	6	2	4	4	3	4	12	6.12041e-07	1.01841e-05	0.576579	0.999913
AKAP1	1303	953	1166	698	1334	1042	1039	892	1204	934	1574	1243	0.322485	0.568364	0.778014	0.999913
AKAP10	623	605	586	492	530	590	478	563	364	616	676	825	0.695494	0.821084	0.578435	0.999913
AKAP11	1616	1682	1799	1303	917	1600	1025	1052	494	1528	1378	1874	0.0473144	0.165761	0.534969	0.999913
AKAP12	263	1003	3944	2591	321	934	283	456	311	1110	595	1496	0	0	0.036245	0.999913
AKAP13	632	636	606	452	337	552	368	433	229	554	561	852	0.187741	0.420252	0.761886	0.999913
AKAP14	1	1	0	0	0	4	1	0	0	2	0	1	0.175779	0.403508	0.508072	0.999913
AKAP17A (NC_000023 1709985..1721913)	476	520	255	464	492	594	367	698	368	590	500	944	0.0146311	0.0669595	0.415446	0.999913
AKAP17A (NC_000024 1659985..1671913)	554	587	450	311	397	634	407	766	555	577	783	877	0.0092712	0.0463921	0.422345	0.999913
AKAP3	15	23	8	19	7	20	10	13	6	28	6	29	0.973736	0.985272	0.896972	0.999913
AKAP4	0	1	0	2	0	3	0	0	0	2	0	3	0.785447	0.869532	0.791909	0.999913
AKAP5	212	102	72	68	160	210	147	83	83	93	244	137	0.0308348	0.119877	0.233074	0.999913
AKAP6	10	26	8	8	6	22	8	13	8	21	8	30	0.298501	0.545274	0.72539	0.999913
AKAP7	58	40	49	23	62	58	68	46	51	52	83	49	0.0710084	0.220534	0.355664	0.999913
AKAP8	651	671	650	415	513	622	489	590	563	507	734	891	0.714412	0.827741	0.876523	0.999913
AKAP8L	645	694	410	364	438	660	470	739	609	652	727	889	0.00148939	0.0102113	0.520408	0.999913
AKAP9	1623	2365	1299	1047	923	2095	1268	1578	614	2260	1532	3247	0.251648	0.496634	0.930528	0.999913
AKD1	37	32	54	32	25	24	38	31	15	25	40	45	0.0537925	0.181269	0.492884	0.999913
AKIP1	270	214	251	203	207	279	201	289	263	232	277	334	0.976909	0.986982	0.811319	0.999913
AKIRIN1	1321	1481	1227	1437	1199	1623	1148	1503	902	1237	1523	2101	0.428736	0.659282	0.144531	0.999913
AKIRIN2	290	278	325	281	230	447	186	273	223	353	362	560	0.389093	0.629174	0.355378	0.999913
AKNAD1	0	0	1	4	0	3	0	2	0	1	0	7	0.17341	0.400021	0.859633	0.999913
AKR1A1	902	715	987	504	1029	1127	1047	987	1138	780	1616	1318	0.0440806	0.157341	0.641121	0.999913
AKR1B1	1	3	0	6	1	8	0	1	0	10	0	5	0.897842	0.942495	0.992355	0.999913
AKR1B10	1	332	0	0	3	288	4	561	6	560	4	403	5.58191e-07	9.40101e-06	0.859902	0.999913
AKR1B15	0	10	1	0	0	8	0	13	0	5	0	13	0.191362	0.424872	0.613937	0.999913
AKR1C1	0	4	0	1	0	9	0	6	0	4	1	2	0.251806	0.496707	0.547873	0.999913
AKR1C2	0	2	0	0	0	1	1	3	0	2	0	2	0.173079	0.399604	0.562128	0.999913
AKR1C3	0	4	0	1	1	15	0	4	0	7	0	4	0.210792	0.449284	0.340744	0.999913
AKR1C4	0	3	0	0	0	5	0	2	0	2	0	1	0.169832	0.394624	0.527059	0.999913
AKR1D1	0	3	0	0	0	6	0	2	0	4	0	7	0.0839114	0.248191	0.85656	0.999913
AKR1E2	0	1	0	0	0	0	0	1	0	2	0	2	0.357005	0.601859	0.552642	0.999913
AKR7A2	585	513	470	384	510	585	466	480	467	446	969	764	0.179117	0.408598	0.618158	0.999913
AKR7A3	102	129	86	49	111	169	87	110	100	120	124	169	0.00552508	0.0305509	0.545426	0.999913
AKT1	2486	1813	2084	1904	1798	2051	2051	1984	1926	1438	3148	2741	0.49398	0.708184	0.641698	0.999913
AKT1S1	456	353	463	417	263	276	294	237	383	222	585	398	0.000754344	0.00575719	0.116829	0.999913
AKT2	1232	1049	1121	801	983	864	1095	1039	1031	802	1616	1452	0.805921	0.884151	0.956599	0.999913
AKT3	413	206	340	219	229	142	260	103	180	161	336	190	0.0237323	0.0980216	0.893631	0.999913
AKTIP	221	168	164	74	150	208	158	179	154	174	333	291	0.003393	0.0203084	0.360916	0.999913
ALAS1	1192	1345	1186	1329	1035	1566	892	1277	958	1033	1447	2042	0.238114	0.48211	0.65709	0.999913
ALAS2	1	0	0	0	0	1	0	1	1	0	1	1	0.279234	0.524336	0.77399	0.999913
ALB	1	2	1	0	0	6	1	3	1	2	1	6	0.375677	0.617692	0.95152	0.999913
ALCAM	575	506	972	604	86	160	367	275	389	522	848	735	0.0116592	0.0557091	0.00184843	0.523751
ALDH16A1	484	240	279	305	391	364	375	289	618	253	560	364	0.64358	0.796436	0.843141	0.999913
ALDH18A1	3764	2134	3656	1999	3445	1860	3059	1832	3091	1791	5069	2769	0.286586	0.532531	0.765957	0.999913
ALDH1A2	0	11	0	1	0	3	0	8	0	5	0	11	0.145794	0.358883	0.846572	0.999913
ALDH1A3	10	25	15	15	8	23	2	12	7	24	15	36	0.537459	0.734218	0.164478	0.999913
ALDH1L1	0	14	0	2	0	4	0	8	0	20	0	31	0.171049	0.39624	0.0366271	0.999913
ALDH1L2	3	28	8	10	7	39	4	30	3	40	4	46	0.37798	0.619776	0.708175	0.999913
ALDH2	1550	1549	1205	820	1429	1403	1052	1201	1570	1378	2057	2327	0.00768502	0.0398162	0.0595895	0.999913
ALDH3A1	0	0	0	0	0	1	0	1	0	0	0	1	0.523321	0.726267	0.70861	0.999913
ALDH3A2	873	516	685	288	910	639	899	455	652	386	1265	731	0.00657592	0.035236	0.116436	0.999913
ALDH3B1	22	38	1	15	5	43	6	44	16	61	23	70	0.000164398	0.00152098	0.0274367	0.999913
ALDH3B2	0	3	0	0	0	0	0	2	0	6	0	2	0.186867	0.419234	0.384311	0.999913
ALDH4A1	471	645	311	440	399	681	325	675	382	473	772	1015	0.0217619	0.0914569	0.608729	0.999913
ALDH5A1	688	683	639	246	643	697	534	543	478	583	1078	902	0.00355448	0.0210786	0.787302	0.999913
ALDH6A1	123	104	158	115	76	101	98	144	68	132	134	97	0.0590894	0.194026	0.604888	0.999913
ALDH7A1	1509	1783	1458	1315	1131	1651	1500	2109	1697	2178	2436	3339	0.223127	0.465014	0.0541355	0.999913
ALDH8A1	6	11	2	1	1	6	8	8	6	7	7	16	0.0266714	0.107128	0.60251	0.999913
ALDH9A1	1440	1095	1569	1545	1337	1598	1251	1432	1267	1198	1791	1625	0.0299404	0.117286	0.209688	0.999913
ALDOA	13190	8674	13761	9579	12200	10319	11637	8903	16191	8020	19180	13607	0.419104	0.652053	0.403793	0.999913
ALDOC	420	287	303	148	159	306	289	304	149	284	332	418	0.416117	0.650046	0.555518	0.999913
ALG1	526	425	598	280	590	465	553	470	646	399	804	606	0.203612	0.440445	0.858502	0.999913
ALG10	194	138	194	127	105	228	155	135	91	156	233	196	0.501119	0.71309	0.596441	0.999913
ALG10B	167	121	163	137	89	203	120	124	85	133	197	223	0.225376	0.467573	0.938263	0.999913
ALG11	178	228	184	163	103	225	118	129	70	197	184	311	0.234811	0.478925	0.703718	0.999913
ALG12	205	191	276	222	148	211	201	183	181	217	315	323	0.0387295	0.142617	0.248804	0.999913
ALG13	449	491	299	267	306	472	287	446	213	402	388	598	0.10126	0.281646	0.212928	0.999913
ALG14	95	43	77	31	97	35	108	32	89	42	159	70	0.208672	0.446801	0.437641	0.999913
ALG1L	3	2	0	1	2	4	1	7	1	12	2	9	0.0505408	0.173262	0.634145	0.999913
ALG1L2	1	19	2	2	2	3	0	9	1	12	5	23	0.295147	0.541895	0.108461	0.999913
ALG3	767	586	766	557	860	590	830	707	1190	673	1377	971	0.506383	0.716851	0.201292	0.999913
ALG5	449	312	445	266	411	353	485	433	449	330	621	537	0.376685	0.618783	0.646603	0.999913
ALG6	243	179	348	208	266	225	262	200	260	186	324	231	0.0488708	0.169597	0.310622	0.999913
ALG8	923	533	1062	783	866	568	978	671	1102	568	1250	817	0.0353231	0.133129	0.955015	0.999913
ALG9	616	611	397	175	471	587	561	625	562	579	933	912	2.26332e-08	5.07458e-07	0.370398	0.999913
ALK	0	3	0	2	0	6	0	7	0	7	0	9	0.417623	0.651011	0.934019	0.999913
ALKBH1	266	255	258	246	236	252	239	256	250	219	319	354	0.529927	0.729984	0.803588	0.999913
ALKBH2	439	272	447	213	536	347	352	308	504	282	648	471	0.283369	0.528297	0.858116	0.999913
ALKBH3	379	232	423	240	310	305	304	232	350	211	536	360	0.259992	0.505091	0.800556	0.999913
ALKBH4	275	190	223	117	250	179	225	197	211	138	325	294	0.148065	0.362443	0.554766	0.999913
ALKBH5	1270	1109	1056	744	1187	1335	965	1150	1159	998	1551	1615	0.0809789	0.242141	0.706735	0.999913
ALKBH6	197	154	128	184	92	222	134	194	168	229	166	239	0.944439	0.969426	0.536638	0.999913
ALKBH7	176	96	166	70	116	132	127	106	163	103	234	153	0.5003	0.71216	0.44198	0.999913
ALKBH8	377	225	402	172	323	222	287	200	223	242	422	311	0.534453	0.73268	0.828065	0.999913
ALLC	0	1	0	0	0	2	0	0	2	3	1	9	0.0992075	0.277815	0.057104	0.999913
ALMS1	1252	491	998	532	636	530	847	302	424	446	1104	583	0.166602	0.389698	0.695473	0.999913
ALOX12	10	27	11	25	12	30	16	13	3	32	4	59	0.784507	0.868758	0.533103	0.999913
ALOX12B	36	66	28	36	35	67	37	82	42	97	37	70	0.11981	0.316284	0.944592	0.999913
ALOX15	0	3	0	1	0	3	0	1	0	1	0	1	0.854297	0.916067	0.668018	0.999913
ALOX15B	0	0	0	0	0	0	0	1	0	1	0	2	0.462994	0.682699	0.704266	0.999913
ALOX5	0	2	0	0	0	0	0	3	2	3	0	5	0.108418	0.295305	0.241653	0.999913
ALOX5AP	0	1	0	0	0	1	0	3	0	2	0	3	0.234922	0.478925	0.975292	0.999913
ALOXE3	26	105	10	42	28	78	42	89	41	105	63	256	0.00788035	0.040676	0.0945143	0.999913
ALPK1	122	112	141	128	113	152	104	146	93	165	111	145	0.225149	0.467305	0.35379	0.999913
ALPK2	0	8	0	2	0	5	0	8	1	10	0	12	0.197742	0.432343	0.436324	0.999913
ALPK3	2	16	0	1	1	22	1	11	3	18	2	28	0.000873179	0.00650962	0.466465	0.999913
ALPL	1	6	0	11	1	9	0	5	1	3	2	15	0.611214	0.775319	0.702409	0.999913
ALPP	0	4	0	0	0	3	0	0	0	0	0	2	0.266825	0.512745	0.758711	0.999913
ALPPL2	0	1	0	0	0	0	0	0	0	1	0	2	0.46659	0.685594	0.261575	0.999913
ALS2	927	1179	894	1120	583	1271	630	841	423	948	1095	1687	0.0452493	0.160463	0.942046	0.999913
ALS2CL	184	1173	155	538	137	985	113	1058	205	1200	225	1746	0.0227384	0.0947207	0.0112681	0.999913
ALS2CR11	0	13	2	2	2	16	0	5	0	15	2	13	0.392605	0.632292	0.848404	0.999913
ALS2CR12	1	8	1	4	2	13	1	1	4	9	1	10	0.46078	0.681275	0.643728	0.999913
ALS2CR8	33	44	34	30	17	47	21	49	10	47	30	63	0.657911	0.807983	0.685499	0.999913
ALX1	0	1	0	0	0	1	0	0	0	0	0	2	0.475933	0.693597	0.872885	0.999913
ALX3	57	62	71	35	62	78	41	68	64	71	68	103	0.517102	0.723268	0.788274	0.999913
ALX4	4	4	0	0	2	4	0	7	1	6	2	5	0.0104084	0.0509911	0.984014	0.999913
ALYREF	1335	501	1346	659	1221	646	1027	546	1360	464	1779	710	0.0611071	0.198122	0.913154	0.999913
AMACR	83	87	68	67	67	149	73	93	63	80	100	131	0.326212	0.572425	0.245478	0.999913
AMBN	0	2	0	0	0	0	0	1	0	1	0	2	0.36012	0.60395	0.704266	0.999913
AMBRA1	589	470	596	435	483	359	444	345	480	395	696	659	0.135196	0.342924	0.224194	0.999913
AMD1	3277	2589	3328	2080	3320	2938	2663	2003	2543	2076	4771	3819	0.882297	0.933516	0.915997	0.999913
AMDHD1	10	22	21	21	11	39	14	32	14	41	5	43	0.525359	0.727415	0.622834	0.999913
AMDHD2	258	338	271	288	196	436	206	336	260	307	352	452	0.798161	0.878658	0.847593	0.999913
AMFR	1970	1494	1664	1667	1545	1569	1423	1516	1459	1381	2328	2259	0.237382	0.481179	0.891948	0.999913
AMH	9	9	9	5	11	9	20	3	18	8	55	26	0.264778	0.510349	0.0671684	0.999913
AMHR2	0	2	0	0	0	5	0	0	0	3	1	3	0.141661	0.352583	0.643748	0.999913
AMICA1	0	0	0	1	0	1	0	2	0	1	0	1	0.902704	0.94556	0.779827	0.999913
AMIGO1	230	232	175	66	130	214	143	163	119	234	245	325	0.00751183	0.0391795	0.232757	0.999913
AMIGO2	0	0	0	0	0	0	0	1	0	0	0	2	0.538715	0.734218	0.902793	0.999913
AMIGO3	13	14	21	8	19	22	19	30	16	31	39	47	0.172313	0.39828	0.457888	0.999913
AMMECR1	277	268	339	263	311	363	240	214	209	242	514	411	0.337078	0.58304	0.96289	0.999913
AMMECR1L	930	1013	833	918	724	1003	588	911	598	944	934	1547	0.361212	0.604848	0.830368	0.999913
AMN	4	7	2	2	2	5	1	3	0	3	6	8	0.546414	0.740221	0.733304	0.999913
AMN1	97	107	25	17	101	92	68	89	70	81	75	105	1.0749e-09	2.90579e-08	0.162653	0.999913
AMOT	109	75	100	55	57	110	96	74	90	111	99	98	0.669284	0.815745	0.888336	0.999913
AMOTL1	0	749	21	35	2	347	2	613	5	923	3	1300	0.141218	0.351951	0.03649	0.999913
AMOTL2	3001	2687	509	1024	2034	2404	1324	1759	1701	1841	3081	3228	1.3082e-08	3.05881e-07	0.454128	0.999913
AMPD1	0	2	1	1	0	1	0	2	0	3	0	2	0.456136	0.677916	0.786759	0.999913
AMPD2	866	889	1300	699	850	711	841	823	932	747	1229	1282	0.116299	0.309603	0.460961	0.999913
AMPD3	40	123	224	311	40	131	23	59	35	117	72	144	0	0	0.29102	0.999913
AMPH	0	6	0	1	0	9	0	7	0	15	0	16	0.0580331	0.191325	0.404198	0.999913
AMT	40	66	15	29	18	51	41	89	35	85	31	127	0.00710188	0.0374771	0.69682	0.999913
AMTN	0	0	0	0	0	0	0	1	0	0	0	1	0.60443	0.771402	0.909363	0.999913
AMY1A	0	0	0	0	0	0	0	0	0	0	0	2	0.639689	0.792905	0.396455	0.999913
AMY1B	0	1	0	0	0	0	0	2	0	0	0	3	0.37257	0.614995	0.983837	0.999913
AMY1C	0	1	0	0	0	1	0	0	0	0	2	3	0.282787	0.527923	0.364639	0.999913
AMY2A	0	1	0	0	0	5	0	6	0	1	0	2	0.150098	0.365513	0.230025	0.999913
AMY2B	22	61	51	41	24	116	23	104	16	62	28	87	0.387203	0.627471	0.0234827	0.999913
AMZ1	1	1	0	1	0	7	0	5	0	8	0	6	0.229144	0.472622	0.929151	0.999913
AMZ2	878	1091	1086	699	800	1662	714	1355	887	1362	1294	2033	0.262214	0.507074	0.536555	0.999913
ANAPC1	2523	1152	2640	1310	1837	1166	2086	1084	1488	1054	2968	1615	0.0115456	0.0552543	0.603702	0.999913
ANAPC10	157	129	168	116	166	118	152	100	146	105	284	180	0.686157	0.820465	0.53248	0.999913
ANAPC11	546	282	631	316	547	490	428	398	618	352	774	544	0.771383	0.859777	0.906228	0.999913
ANAPC13	729	796	716	732	697	999	646	865	737	743	1066	1387	0.750397	0.844648	0.822816	0.999913
ANAPC15	278	65	297	123	200	83	278	84	350	64	467	99	0.0891733	0.259073	0.518683	0.999913
ANAPC16	508	457	349	239	491	463	414	454	479	374	662	636	0.00143961	0.00994961	0.848555	0.999913
ANAPC4	439	344	457	318	469	424	412	371	406	360	591	555	0.960265	0.978029	0.655066	0.999913
ANAPC5	2093	1475	1944	1285	1988	1892	1887	1687	2039	1507	2856	2359	0.42069	0.653165	0.801232	0.999913
ANAPC7	921	658	762	756	779	716	758	756	729	626	1211	1081	0.539953	0.735203	0.944677	0.999913
ANG	9	16	10	13	15	29	27	41	18	27	37	58	0.0553858	0.185569	0.951957	0.999913
ANGEL1	612	579	538	439	474	502	565	532	342	534	733	776	0.886367	0.935578	0.536522	0.999913
ANGEL2	1023	683	906	491	912	751	735	617	550	627	1191	1074	0.633848	0.790071	0.505879	0.999913
ANGPT1	3	3	0	1	2	11	0	6	2	12	1	11	0.0275995	0.110178	0.701671	0.999913
ANGPT2	0	0	0	2	0	1	0	2	0	0	0	3	0.618656	0.778276	0.862111	0.999913
ANGPT4	0	0	0	0	0	2	0	1	0	2	0	1	0.351829	0.596209	0.983388	0.999913
ANGPTL1	0	1	0	0	0	1	0	0	0	0	0	1	0.527749	0.728294	0.941844	0.999913
ANGPTL3	0	1	0	0	0	3	0	2	0	2	0	1	0.252089	0.496751	0.715009	0.999913
ANGPTL4	32	42	762	197	13	65	22	53	10	36	18	71	0	0	0.140268	0.999913
ANGPTL5	0	1	1	0	0	3	0	2	0	1	0	1	0.597834	0.771159	0.544701	0.999913
ANGPTL6	4	7	10	5	8	28	4	11	7	17	10	18	0.700209	0.822248	0.858952	0.999913
ANGPTL7	0	1	0	1	0	0	0	1	0	3	0	1	0.982233	0.988948	0.511513	0.999913
ANHX	0	1	0	0	0	5	0	2	0	0	0	0	0.314915	0.560582	0.0583604	0.999913
ANK1	2	14	0	1	0	24	2	30	1	27	0	35	0.000176815	0.00162169	0.806092	0.999913
ANK2	73	67	79	35	68	63	67	41	45	68	73	63	0.888653	0.937165	0.516611	0.999913
ANK3	1	12	0	2	0	23	1	15	0	19	0	29	0.00920795	0.0461654	0.94966	0.999913
ANKAR	15	18	21	27	9	31	8	12	9	28	17	37	0.0962188	0.272036	0.400364	0.999913
ANKDD1A	103	125	72	54	100	145	81	103	92	90	153	173	0.00524075	0.0292572	0.919319	0.999913
ANKDD1B	0	3	1	5	0	6	1	6	1	6	1	8	0.753089	0.845986	0.848858	0.999913
ANKFN1	0	2	5	0	0	6	0	5	2	7	0	5	0.343252	0.589405	0.566314	0.999913
ANKFY1	1661	1327	1512	1121	1329	1160	1383	1196	981	1103	1810	1762	0.459432	0.680516	0.384124	0.999913
ANKH	706	515	559	349	556	489	487	379	440	431	983	753	0.366593	0.609249	0.340653	0.999913
ANKHD1	1506	1317	1609	1246	1054	1320	1157	987	915	1152	1868	1817	0.0432922	0.155142	0.669648	0.999913
ANKHD1-EIF4EBP3	1089	881	921	863	628	787	708	719	542	770	983	1215	0.0611191	0.198125	0.929937	0.999913
ANKIB1	1204	1260	1103	723	645	1170	842	943	514	1108	1235	1634	0.965565	0.981069	0.945033	0.999913
ANKK1	0	1	1	1	1	1	0	4	0	6	0	7	0.99803	0.99864	0.796105	0.999913
ANKLE1	24	31	15	10	21	19	18	35	27	25	28	31	0.0422051	0.152368	0.948471	0.999913
ANKLE2	1927	1310	1734	1395	1528	1399	1461	1214	1391	1230	2141	1921	0.187284	0.419626	0.936551	0.999913
ANKMY1	52	82	58	75	52	86	55	68	47	80	92	100	0.68305	0.820465	0.883922	0.999913
ANKMY2	478	437	581	337	339	618	341	387	331	382	600	648	0.273782	0.519564	0.830166	0.999913
ANKRA2	145	560	143	232	101	926	92	703	105	749	177	983	0.0498205	0.171432	0.808803	0.999913
ANKRD1	395	737	1	5	125	330	27	66	233	317	189	821	1.06737e-05	0.000134856	0.025763	0.999913
ANKRD10	290	276	357	183	276	336	306	303	238	312	423	488	0.527834	0.72832	0.884683	0.999913
ANKRD11	3516	2004	2481	1583	3290	1738	1990	1354	2552	1610	3565	2695	0.78982	0.872441	0.695899	0.999913
ANKRD12	728	934	809	638	384	1022	449	685	231	836	712	1235	0.0904994	0.261953	0.698907	0.999913
ANKRD13A	859	1698	2003	1206	613	1353	671	1117	588	1253	1167	2618	2.13525e-05	0.000250118	0.156151	0.999913
ANKRD13B	547	413	482	428	481	353	474	429	597	350	709	588	0.581552	0.762741	0.556561	0.999913
ANKRD13C	380	362	439	276	320	395	280	310	270	318	409	499	0.31048	0.556984	0.685651	0.999913
ANKRD13D	360	377	317	239	270	349	281	375	327	333	404	521	0.296192	0.543426	0.689931	0.999913
ANKRD16	180	108	171	80	133	91	145	106	170	62	232	147	0.974307	0.985282	0.882277	0.999913
ANKRD17	3730	2591	3221	2007	2554	1903	2621	1604	1796	1828	3861	2901	0.232525	0.476737	0.918639	0.999913
ANKRD2	0	0	0	1	0	0	0	2	0	1	0	4	0.996208	0.997579	0.715558	0.999913
ANKRD20A19P	1	1	0	0	0	2	0	0	2	3	2	2	0.111518	0.300564	0.162512	0.999913
ANKRD22	0	1	0	0	0	6	0	8	0	3	0	4	0.0766064	0.232741	0.384332	0.999913
ANKRD23	94	122	67	101	87	172	87	137	100	138	104	198	0.124531	0.324371	0.76677	0.999913
ANKRD24	4	23	1	13	0	29	0	28	4	42	1	25	0.284591	0.529918	0.297995	0.999913
ANKRD26	214	243	225	208	94	312	123	173	66	235	158	360	0.0508197	0.173913	0.661901	0.999913
ANKRD27	1370	670	1027	664	993	482	823	480	823	529	1447	849	0.133404	0.339575	0.365059	0.999913
ANKRD28	1241	593	883	517	900	547	903	490	668	534	1391	748	0.943394	0.968792	0.809293	0.999913
ANKRD29	0	1	0	0	0	4	0	3	0	0	0	1	0.256459	0.501335	0.210551	0.999913
ANKRD30A	0	3	0	0	0	3	0	1	0	1	0	2	0.236511	0.480223	0.799078	0.999913
ANKRD30B	0	4	1	0	0	4	0	2	0	3	0	5	0.992871	0.995581	0.900057	0.999913
ANKRD31	10	36	46	45	11	37	16	30	18	56	14	45	0.000777106	0.00590491	0.540319	0.999913
ANKRD32	376	141	349	279	400	224	334	203	275	164	514	269	0.0243555	0.0999719	0.189759	0.999913
ANKRD33	0	0	0	0	0	0	0	0	0	1	0	0	0.688371	0.820465	0.461794	0.999913
ANKRD33B	1950	1367	178	216	689	811	409	532	375	684	1423	1236	0.00736438	0.038588	0.43789	0.999913
ANKRD34A	62	83	98	227	42	97	31	88	39	65	79	120	1.38768e-10	4.21311e-09	0.914086	0.999913
ANKRD34B	0	2	0	1	0	1	0	2	0	0	0	3	0.93372	0.962922	0.862111	0.999913
ANKRD34C	0	6	0	2	0	7	0	5	0	6	0	10	0.386076	0.626356	0.868833	0.999913
ANKRD35	0	1	0	1	0	3	0	0	0	0	0	1	0.882632	0.933639	0.578939	0.999913
ANKRD36	349	428	388	344	165	514	232	153	63	329	219	386	0.117042	0.310984	0.358954	0.999913
ANKRD36B	183	204	148	134	68	230	120	76	29	171	130	217	0.548663	0.741948	0.611156	0.999913
ANKRD36C	270	216	329	266	114	290	128	89	35	149	156	212	0.00604503	0.0330102	0.304373	0.999913
ANKRD37	44	41	18	16	19	88	31	76	35	40	23	60	0.0303884	0.118525	0.0707993	0.999913
ANKRD39	256	165	178	139	244	187	234	167	281	122	432	258	0.108475	0.295326	0.734265	0.999913
ANKRD40	1374	1116	1471	805	1326	1007	1149	999	1103	1032	1808	1646	0.970917	0.983815	0.73598	0.999913
ANKRD42	104	108	97	96	48	99	75	79	44	121	122	156	0.296814	0.5441	0.273483	0.999913
ANKRD44	194	95	127	66	102	84	133	71	98	92	200	131	0.491558	0.706957	0.491652	0.999913
ANKRD45	1	20	1	1	1	12	0	9	0	60	1	34	0.591994	0.766947	0.289154	0.999913
ANKRD46	347	373	263	229	290	390	226	284	259	378	342	450	0.180163	0.40985	0.860389	0.999913
ANKRD49	168	136	167	138	132	204	132	117	117	114	236	206	0.424033	0.655979	0.686703	0.999913
ANKRD5	0	3	28	62	1	2	1	4	0	6	3	6	0	0	0.611792	0.999913
ANKRD50	815	857	984	696	506	1085	534	573	349	809	766	1170	0.0328122	0.125879	0.667965	0.999913
ANKRD52	4345	3143	2605	1927	2890	2940	3196	2468	2667	2607	4694	4235	0.0248465	0.101552	0.851636	0.999913
ANKRD53	1	6	2	1	1	9	0	11	3	8	6	13	0.179889	0.409532	0.376314	0.999913
ANKRD54	369	291	383	285	304	371	315	345	327	261	483	467	0.592116	0.76705	0.671548	0.999913
ANKRD55	0	3	0	2	0	1	0	1	0	1	0	6	0.909364	0.949113	0.535205	0.999913
ANKRD6	5	18	5	3	6	16	4	25	4	13	5	17	0.134546	0.34142	0.288602	0.999913
ANKRD60	0	0	0	0	0	0	0	0	0	1	0	0	0.688371	0.820465	0.461794	0.999913
ANKRD62	1	1	0	0	0	1	0	0	0	0	0	4	0.300135	0.547103	0.619115	0.999913
ANKRD63	11	7	2	1	5	4	6	2	7	8	6	8	0.0463151	0.163086	0.421402	0.999913
ANKRD65	0	2	0	0	0	2	0	2	0	2	0	1	0.25017	0.495115	0.830667	0.999913
ANKRD7	0	0	0	0	0	1	0	0	0	0	0	1	0.617881	0.777871	0.941844	0.999913
ANKRD9	117	58	95	53	70	68	73	58	82	57	114	90	0.805461	0.883901	0.741155	0.999913
ANKS1A	674	646	638	421	469	478	576	525	483	548	756	797	0.95804	0.976928	0.678693	0.999913
ANKS1B	7	10	3	4	5	10	3	12	5	9	7	24	0.149304	0.3643	0.633448	0.999913
ANKS3	133	120	158	75	151	117	113	132	144	127	196	180	0.457492	0.679538	0.697215	0.999913
ANKS4B	0	0	0	0	0	1	0	3	1	3	0	7	0.131768	0.336695	0.35422	0.999913
ANKUB1	0	6	0	0	0	2	0	1	0	4	0	11	0.0755715	0.230218	0.22281	0.999913
ANKZF1	721	469	458	290	508	637	486	514	561	457	713	692	0.00840718	0.0429886	0.648091	0.999913
ANLN	2008	928	3792	5044	1490	1931	1542	1543	1101	1321	2910	2554	0	0	0.836609	0.999913
ANO1	1	3	0	0	0	3	0	8	0	5	0	13	0.0298978	0.117196	0.746787	0.999913
ANO10	266	180	214	135	190	145	193	105	218	136	320	229	0.985378	0.990605	0.176984	0.999913
ANO2	0	67	0	0	0	40	0	44	0	62	0	103	3.93218e-07	6.8733e-06	0.102013	0.999913
ANO3	0	6	0	1	0	5	0	3	0	11	0	9	0.183287	0.414353	0.328155	0.999913
ANO4	0	1	0	2	0	3	0	8	0	5	0	11	0.523495	0.726397	0.846572	0.999913
ANO5	0	3	0	1	0	3	0	2	0	3	0	7	0.520438	0.72551	0.660971	0.999913
ANO6	2376	1272	1592	768	1245	880	1369	769	842	869	2461	1602	0.860083	0.919697	0.625303	0.999913
ANO7	79	71	118	71	60	87	68	62	48	53	86	116	0.0232813	0.0965455	0.497035	0.999913
ANO8	203	323	76	105	86	269	147	282	126	252	185	441	9.31307e-07	1.48383e-05	0.605119	0.999913
ANO9	11	76	2	20	1	13	12	109	20	40	35	224	0.102353	0.283654	0.3241	0.999913
ANP32A	3487	1418	3842	1513	3070	1337	2791	1404	2958	1077	4732	1918	0.0350096	0.13228	0.868042	0.999913
ANP32C	0	0	0	0	0	1	0	0	0	0	0	0	0.709053	0.823068	0.482786	0.999913
ANP32D	0	0	0	0	0	1	0	0	0	0	0	0	0.709053	0.823068	0.482786	0.999913
ANP32E	3218	1338	3285	1726	2452	1927	2511	1513	1800	1292	3753	2108	0.0164098	0.0734018	0.122664	0.999913
ANPEP	0	2	1	0	0	4	0	3	0	3	0	6	0.997336	0.998053	0.938216	0.999913
ANTXR1	0	3	0	0	0	10	0	10	0	9	1	13	0.0103384	0.0507314	0.848214	0.999913
ANTXR2	225	276	4614	1429	142	155	286	287	210	407	300	387	0	0	0.457024	0.999913
ANXA10	0	3	0	2	0	3	0	3	0	4	0	5	0.80985	0.886773	0.811129	0.999913
ANXA11	1156	860	1045	773	899	944	825	825	1095	692	1380	1088	0.638052	0.792905	0.921106	0.999913
ANXA13	0	2	0	0	0	2	0	4	0	1	0	2	0.207884	0.445992	0.548032	0.999913
ANXA2	10026	8566	15398	9629	7487	5574	6421	5981	8535	5605	13131	10509	6.8811e-08	1.41416e-06	0.0474277	0.999913
ANXA2R	21	18	20	20	23	16	20	18	14	12	34	26	0.627587	0.785401	0.702785	0.999913
ANXA3	0	2	1	10	3	2	0	0	5	4	0	2	0.0939126	0.267608	0.402876	0.999913
ANXA4	379	853	494	427	371	894	316	791	444	956	464	969	0.426565	0.658031	0.688307	0.999913
ANXA5	4079	5160	7022	8993	4456	6154	3289	5129	6046	5419	6568	8801	2.66458e-05	0.000302479	0.0873241	0.999913
ANXA6	1980	1620	1436	1379	1459	1373	1614	1075	1803	1404	2816	2164	0.704369	0.823068	0.0358736	0.999913
ANXA7	1982	1421	1542	1316	1621	1295	1344	1271	1682	1347	2313	1992	0.908298	0.948604	0.298197	0.999913
ANXA8	0	3	0	0	1	1	0	4	0	4	1	4	0.0822096	0.244726	0.88321	0.999913
ANXA8L1	0	1	0	1	0	2	0	2	0	3	0	8	0.599415	0.771402	0.500257	0.999913
ANXA8L2	0	5	0	1	2	2	0	1	3	1	0	0	0.436774	0.66523	0.78455	0.999913
ANXA9	68	82	59	62	52	99	61	102	43	71	62	120	0.693707	0.821084	0.137513	0.999913
AOAH	0	1	0	0	0	0	0	1	0	3	0	3	0.290421	0.536887	0.368923	0.999913
AOC2	75	129	56	43	61	157	65	161	57	154	123	253	0.000157291	0.00146652	0.503104	0.999913
AOC3	40	91	32	16	44	73	20	91	43	97	88	170	0.000505152	0.00405473	0.0227941	0.999913
AOX1	1	6	225	342	0	13	1	5	0	12	0	17	0	0	0.840506	0.999913
AP1AR	610	454	572	529	487	449	448	405	371	506	659	690	0.0612774	0.19846	0.775619	0.999913
AP1B1	2002	1593	1601	1663	1605	1586	1508	1448	1649	1370	2492	2274	0.458843	0.680179	0.639572	0.999913
AP1G1	2692	2202	2358	1627	1864	2076	2029	1834	1354	1844	3071	3433	0.909607	0.949256	0.986943	0.999913
AP1G2	431	688	495	815	364	675	372	672	541	653	578	997	0.0470397	0.16512	0.185159	0.999913
AP1M1	436	400	449	381	392	417	324	367	395	385	583	662	0.476799	0.694497	0.305037	0.999913
AP1M2	160	330	18	62	162	386	127	257	186	238	291	409	0	0	0.623262	0.999913
AP1S1	2099	2346	2223	1300	2067	2442	1620	2279	1997	1737	3193	3223	0.165476	0.388477	0.993059	0.999913
AP1S2	521	568	341	450	659	781	830	712	737	718	1236	1217	0.00308148	0.0187937	0.470607	0.999913
AP1S3	0	8	0	7	1	9	0	6	1	7	1	8	0.941296	0.967338	0.962547	0.999913
AP2A1	718	818	718	813	497	845	435	665	616	701	839	1195	0.0864551	0.253054	0.140678	0.999913
AP2A2	761	735	662	692	451	436	624	781	666	547	939	929	0.424601	0.656547	0.614926	0.999913
AP2B1	7127	4429	5564	4416	5537	3752	5359	3353	5161	3660	9981	5807	0.350739	0.595558	0.256843	0.999913
AP2M1	5025	4766	4660	3621	4295	5676	3735	4899	4893	3977	7039	7714	0.376914	0.619083	0.560371	0.999913
AP2S1	917	505	1268	955	900	638	835	598	1074	483	1312	834	8.16184e-06	0.0001061	0.892599	0.999913
AP3B1	624	454	684	421	439	376	478	298	393	303	682	568	0.010356	0.0507899	0.94506	0.999913
AP3B2	0	3	0	0	0	1	0	1	0	2	0	2	0.257011	0.50201	0.74832	0.999913
AP3D1	1355	1352	1494	974	1140	1232	1049	1239	1190	1172	1800	1935	0.794028	0.875585	0.418886	0.999913
AP3M1	1423	1102	1400	1438	1249	980	1066	1084	1005	955	1899	1577	0.00616204	0.0334417	0.898503	0.999913
AP3M2	791	381	332	343	608	534	546	399	397	282	930	530	0.0593015	0.19451	0.0816584	0.999913
AP3S1	580	544	674	500	526	624	510	572	588	574	903	902	0.661494	0.810228	0.340083	0.999913
AP3S2	239	201	172	99	211	119	180	120	183	166	245	271	0.0778157	0.235303	0.222425	0.999913
AP4B1	641	458	608	599	622	593	496	415	597	473	789	790	0.124864	0.325038	0.676661	0.999913
AP4E1	787	951	529	461	622	1087	580	813	365	1033	806	1454	0.00265449	0.0165885	0.505064	0.999913
AP4M1	367	302	288	302	288	391	222	271	246	257	377	390	0.498019	0.710891	0.437945	0.999913
AP4S1	72	72	67	24	81	93	55	73	80	82	98	91	0.0112613	0.0542787	0.983886	0.999913
AP5B1	740	548	487	327	576	647	631	552	661	475	971	817	0.00270734	0.0168719	0.993381	0.999913
AP5M1	414	563	427	515	303	736	328	594	274	594	540	929	0.564589	0.754578	0.98771	0.999913
AP5S1	103	111	143	151	113	112	77	119	109	114	181	207	0.0317347	0.122555	0.209177	0.999913
AP5Z1	285	583	363	452	268	569	225	510	331	442	372	792	0.371491	0.614005	0.558961	0.999913
APAF1	967	1388	700	845	555	1752	671	1321	348	1434	920	1950	0.172692	0.398864	0.185265	0.999913
APBA2	0	3	2	2	0	4	0	4	0	4	0	9	0.338783	0.58507	0.759405	0.999913
APBA3	181	228	149	212	168	252	102	204	142	207	187	352	0.786814	0.870135	0.857173	0.999913
APBB1	313	326	295	295	228	361	225	310	282	321	340	496	0.643546	0.796436	0.469647	0.999913
APBB1IP	0	0	0	0	0	4	0	7	0	0	0	4	0.237108	0.480847	0.269516	0.999913
APBB2	661	333	270	103	510	278	334	166	252	209	588	361	0.0142017	0.0653431	0.657695	0.999913
APBB3	154	278	122	78	114	403	109	306	111	312	191	444	7.61844e-05	0.000771352	0.965906	0.999913
APC	1335	1410	1461	1178	924	1521	1050	1018	495	1208	1369	1755	0.0709693	0.220455	0.222888	0.999913
APC2	120	152	92	75	107	154	97	150	130	148	183	249	0.00643589	0.0345849	0.240368	0.999913
APCDD1	0	0	0	0	0	0	0	0	0	3	0	0	0.561959	0.75252	0.235298	0.999913
APCDD1L	0	2	0	0	0	1	0	1	0	0	0	2	0.366419	0.609175	0.894743	0.999913
APEH	3026	2230	2204	1604	2512	2615	2626	2422	2832	2018	4438	3406	0.0206435	0.0877399	0.845253	0.999913
APEX1	2743	1796	3528	1746	2771	2456	2137	1538	2563	1780	3542	2604	0.0934717	0.26674	0.900123	0.999913
APEX2	607	458	570	735	679	790	477	519	691	533	799	814	0.181571	0.411921	0.877687	0.999913
APH1A	1869	1553	2106	1647	1636	1961	1472	1510	1657	1518	2267	2238	0.0921429	0.264795	0.864789	0.999913
APH1B	366	372	289	361	235	321	269	325	211	341	395	562	0.403656	0.640508	0.596319	0.999913
API5	3627	2727	4055	3060	3113	3371	3055	2712	2596	2687	4527	4125	0.0426491	0.153479	0.529812	0.999913
APIP	350	235	469	320	325	234	290	227	319	200	479	329	0.000686633	0.00529655	0.917659	0.999913
APITD1	74	25	71	74	104	62	76	22	90	30	128	58	0.0509539	0.174273	0.75302	0.999913
APITD1-CORT	153	73	167	113	136	96	151	99	131	91	227	148	0.15095	0.366662	0.911037	0.999913
APLF	31	73	32	71	22	86	16	55	26	88	42	113	0.4868	0.70306	0.143619	0.999913
APLN	183	136	74	13	196	224	181	165	200	167	272	221	1.11022e-16	6.05711e-15	0.651115	0.999913
APLNR	0	0	0	0	0	0	0	3	0	1	0	1	0.388033	0.628081	0.761151	0.999913
APLP1	532	2034	348	757	443	2314	412	2324	542	1997	716	3407	1.17083e-07	2.29126e-06	0.419689	0.999913
APLP2	5767	4917	4143	5467	4003	5434	3074	3634	3772	3996	6491	6775	0.132752	0.338729	0.392511	0.999913
APMAP	1582	1474	2134	2079	1449	1595	1270	1524	1472	1361	2102	2044	7.63123e-05	0.000771869	0.996333	0.999913
APOA1	0	0	0	0	0	2	0	0	0	0	0	0	0.597803	0.771159	0.321094	0.999913
APOA1BP	1123	882	1033	639	1134	1154	1026	973	1194	770	1483	1250	0.133302	0.339562	0.361083	0.999913
APOA2	1	3	2	1	0	1	2	2	5	1	6	1	0.752618	0.845827	0.511355	0.999913
APOA4	0	2	0	0	0	1	0	1	0	4	0	5	0.181954	0.412606	0.338849	0.999913
APOA5	0	0	0	0	0	2	0	2	0	1	0	4	0.274944	0.519993	0.999539	0.999913
APOB	0	12	0	1	0	12	0	2	0	9	0	8	0.106994	0.292676	0.875443	0.999913
APOBEC1	0	1	0	0	0	2	0	0	0	0	0	2	0.421206	0.653395	0.917881	0.999913
APOBEC2	5	2	4	6	5	2	8	1	2	2	2	3	0.259305	0.504269	0.398823	0.999913
APOBEC3A	0	0	0	2	0	3	0	2	0	3	1	3	0.957825	0.976928	0.667778	0.999913
APOBEC3B	460	704	1763	2965	359	1517	170	1128	392	1116	442	1323	0	0	0.81498	0.999913
APOBEC3C	502	1762	754	848	610	2446	375	1868	485	1813	622	2365	0.572211	0.759069	0.234969	0.999913
APOBEC3D	12	32	3	4	4	46	11	56	3	39	9	54	5.80919e-05	0.000610946	0.246909	0.999913
APOBEC3F	37	63	91	134	20	138	36	119	45	103	18	41	0.0130476	0.0610152	0.411373	0.999913
APOBEC3G	0	1	0	3	0	2	0	1	0	2	0	2	0.520627	0.725661	0.906521	0.999913
APOBEC3H	1	44	0	0	1	33	1	72	2	68	2	109	1.14339e-05	0.000143454	0.397376	0.999913
APOBEC4	0	0	0	0	0	2	1	2	0	6	0	2	0.164697	0.387478	0.984955	0.999913
APOBR	3	11	1	1	1	10	0	6	3	4	3	6	0.124681	0.32462	0.865206	0.999913
APOC1	38	107	75	193	39	93	62	143	83	111	66	137	0.00749314	0.0391147	0.808684	0.999913
APOC2	0	0	0	0	0	0	0	1	0	0	0	1	0.60443	0.771402	0.909363	0.999913
APOC3	0	0	0	1	0	0	0	0	0	0	0	1	0.50374	0.714458	0.54867	0.999913
APOC4	0	0	0	0	0	0	0	0	0	0	0	1	0.740582	0.838751	0.54867	0.999913
APOD	0	2	0	0	0	2	0	2	0	1	0	0	0.304729	0.551613	0.49246	0.999913
APOE	0	10	1	0	3	2	1	7	1	2	3	10	0.0990941	0.277698	0.893286	0.999913
APOF	0	0	0	0	0	2	0	0	0	0	0	2	0.48069	0.697942	0.917881	0.999913
APOH	0	1	0	0	0	2	0	1	0	0	0	4	0.311751	0.557819	0.999118	0.999913
APOL1	3	30	3	38	0	18	0	18	4	34	3	49	0.136596	0.345471	0.0143953	0.999913
APOL2	474	1424	133	746	531	1996	315	1637	346	1238	615	2093	5.45879e-08	1.14014e-06	0.087601	0.999913
APOL3	0	1	0	0	0	7	0	3	0	1	0	4	0.139263	0.349107	0.450874	0.999913
APOL4	1	2	0	1	0	1	0	3	0	1	0	4	0.641163	0.794186	0.983785	0.999913
APOL5	0	0	0	0	0	0	0	0	0	0	0	1	0.740582	0.838751	0.54867	0.999913
APOL6	9	17	29	94	1	25	0	7	0	14	6	49	8.43769e-15	3.93555e-13	0.249565	0.999913
APOLD1	7	4	12	28	4	41	5	26	4	22	13	24	0.224135	0.466295	0.585018	0.999913
APOM	13	6	15	15	6	13	11	10	17	9	12	25	0.306894	0.553784	0.416967	0.999913
APOO	295	144	243	151	272	197	248	136	267	117	330	193	0.816564	0.891315	0.27511	0.999913
APOOL	846	660	597	533	554	594	683	504	442	579	929	866	0.841297	0.907532	0.917743	0.999913
APOPT1	137	110	230	155	127	105	137	114	148	84	233	180	0.000807362	0.00608445	0.585776	0.999913
APP	7524	4307	6767	4030	5607	2558	4321	1880	4685	2527	8787	4201	0.0104703	0.0511969	0.0944372	0.999913
APPBP2	685	670	527	453	555	622	443	555	398	611	736	855	0.453181	0.676091	0.896603	0.999913
APPL1	1225	735	893	677	744	766	868	608	536	666	1367	1099	0.691425	0.821041	0.968083	0.999913
APPL2	363	324	431	182	246	341	302	357	210	296	417	509	0.953172	0.974443	0.561098	0.999913
APRT	658	565	512	253	672	502	637	521	1021	596	932	788	0.0183498	0.0802452	0.280937	0.999913
AQP1	4	10	3	0	7	8	5	7	7	14	7	11	0.0173282	0.0766529	0.628495	0.999913
AQP10	0	1	0	0	0	1	0	0	0	0	0	1	0.527749	0.728294	0.941844	0.999913
AQP11	23	35	22	17	18	37	9	32	21	31	30	44	0.50464	0.715227	0.531787	0.999913
AQP2	0	2	0	0	0	1	0	0	0	0	0	0	0.507698	0.717359	0.482786	0.999913
AQP4	0	1	0	0	0	1	0	1	0	3	0	5	0.224768	0.467236	0.413442	0.999913
AQP5	1	0	0	0	0	0	0	0	0	0	0	0	0.692387	0.821084	NA	NA
AQP6	0	1	0	2	1	2	1	2	0	4	1	0	0.852524	0.914851	0.72191	0.999913
AQP8	0	0	1	0	2	3	2	3	0	4	0	8	0.378773	0.620231	0.549687	0.999913
AQP9	0	1	0	2	0	1	0	3	0	5	0	4	0.958424	0.977093	0.572994	0.999913
AQPEP	3	1	0	1	1	11	1	3	1	5	0	3	0.163845	0.386108	0.372779	0.999913
AQR	1238	814	1265	756	931	659	988	586	657	658	1434	958	0.0279504	0.111233	0.782341	0.999913
AR	0	9	0	1	0	13	0	6	0	3	0	14	0.103028	0.284845	0.674268	0.999913
ARAF	448	438	465	358	454	501	388	458	523	462	645	667	0.550158	0.742365	0.487258	0.999913
ARAP1	841	831	887	838	711	965	620	775	719	698	971	1209	0.131106	0.335526	0.873728	0.999913
ARAP2	349	333	227	255	295	251	230	182	155	213	475	474	0.856201	0.91707	0.65562	0.999913
ARAP3	793	836	612	656	705	999	618	836	626	814	916	1098	0.272785	0.518507	0.459535	0.999913
ARC	59	227	10	7	71	473	40	236	66	272	39	153	0.000288332	0.00247787	0.387172	0.999913
ARCN1	3029	3297	3914	3275	2580	3758	2522	3433	2295	3605	3812	5612	0.0530361	0.179115	0.802614	0.999913
AREG	15	20	0	0	3	6	1	2	1	18	7	40	0.00294111	0.0180723	0.00678769	0.999913
AREGB	1	25	0	0	2	17	0	4	1	2	6	21	0.0127387	0.0598037	0.719575	0.999913
ARF1	5302	4143	5379	4265	4941	4494	4006	3835	5387	3748	7325	6226	0.290283	0.536853	0.373357	0.999913
ARF3	3057	2811	3583	3727	2334	2809	2463	2682	2027	2239	3732	4213	0.000128811	0.00122575	0.721564	0.999913
ARF4	2475	2767	2241	2340	2513	2780	2334	3048	2368	2468	4077	4402	0.358199	0.602656	0.818125	0.999913
ARF5	1666	1145	1300	1152	1147	1234	1208	1204	1378	977	2042	1800	0.792148	0.874155	0.564267	0.999913
ARF6	1277	848	1690	1186	1063	1167	916	866	927	830	1607	1437	0.000195414	0.00177419	0.881605	0.999913
ARFGAP1	1150	1842	1558	1470	1055	1982	940	2194	1226	2002	1436	3183	0.486169	0.702431	0.437462	0.999913
ARFGAP2	967	808	911	610	942	977	699	908	618	502	1199	1223	0.820926	0.894075	0.0955749	0.999913
ARFGAP3	498	586	1372	1316	346	521	332	592	339	596	494	808	0	0	0.710616	0.999913
ARFGEF1	1869	1915	1814	1195	1073	1739	1317	1347	875	1634	1807	2345	0.481483	0.698556	0.922831	0.999913
ARFGEF2	1444	1696	2211	1821	1036	1660	992	1231	533	1634	1509	2242	1.44067e-06	2.20936e-05	0.631033	0.999913
ARFIP1	471	498	518	381	457	536	388	441	353	456	550	705	0.685569	0.820465	0.562302	0.999913
ARFIP2	496	670	450	561	444	739	542	903	495	539	750	1097	0.356659	0.601526	0.515185	0.999913
ARFRP1	216	196	285	103	129	184	166	213	202	210	263	310	0.962438	0.97941	0.150298	0.999913
ARG1	1	1	0	1	0	3	0	3	0	0	1	1	0.67545	0.820419	0.597931	0.999913
ARG2	655	485	808	607	463	417	641	774	489	492	973	967	0.162672	0.384558	0.944412	0.999913
ARGFX	0	2	0	1	0	4	0	2	0	1	0	2	0.763546	0.85342	0.572565	0.999913
ARGLU1	1015	839	1413	1457	880	893	850	894	753	727	1318	1249	9.82603e-08	1.94832e-06	0.564249	0.999913
ARHGAP1	789	953	863	698	723	1105	708	1162	874	1051	1081	1684	0.314181	0.559766	0.483888	0.999913
ARHGAP10	307	200	241	153	276	183	247	147	274	148	396	223	0.65055	0.802061	0.96838	0.999913
ARHGAP11A	2539	756	3019	2195	2085	1972	2110	1239	1483	1064	3138	1701	2.37444e-05	0.000274035	0.0394153	0.999913
ARHGAP11B	79	61	102	110	59	125	63	46	38	71	85	91	0.00470688	0.0267834	0.42755	0.999913
ARHGAP12	777	935	877	482	626	957	759	729	428	721	1056	1314	0.549635	0.74208	0.472987	0.999913
ARHGAP15	0	3	0	0	0	3	0	6	0	4	0	8	0.0689553	0.215795	0.922306	0.999913
ARHGAP17	708	556	702	530	632	500	582	487	578	410	857	741	0.196266	0.430924	0.766308	0.999913
ARHGAP18	182	138	169	80	164	116	257	142	150	145	267	175	0.199282	0.434526	0.643545	0.999913
ARHGAP19	1141	352	738	472	997	579	953	464	746	395	1208	604	0.903712	0.94623	0.0488555	0.999913
ARHGAP20	2	4	0	5	0	12	0	3	0	4	1	11	0.757351	0.848908	0.91104	0.999913
ARHGAP21	2699	2008	2275	1932	1640	1878	1871	1436	1203	1594	2828	2768	0.0952458	0.270133	0.964182	0.999913
ARHGAP22	157	151	1251	136	161	118	126	132	220	177	230	243	0	0	0.0302248	0.999913
ARHGAP23	93	250	7	18	63	298	47	181	63	224	91	406	0	0	0.411379	0.999913
ARHGAP24	0	2	0	0	0	2	0	7	0	5	0	6	0.0772281	0.23401	0.968109	0.999913
ARHGAP25	0	1	0	2	0	1	0	3	0	4	0	3	0.957304	0.976836	0.734969	0.999913
ARHGAP26	235	220	94	62	131	182	183	137	117	168	250	291	8.42006e-06	0.000108904	0.660147	0.999913
ARHGAP27	293	411	164	365	293	520	233	417	232	339	348	616	0.0988524	0.277391	0.249038	0.999913
ARHGAP28	0	2	0	0	0	3	0	7	0	6	0	2	0.0840178	0.248384	0.780601	0.999913
ARHGAP29	1964	2097	1755	2474	1079	1165	2223	1723	882	1351	4524	3921	0.501214	0.713123	0.520365	0.999913
ARHGAP30	5	24	10	10	4	19	5	18	4	22	8	33	0.949171	0.97234	0.617155	0.999913
ARHGAP31	288	397	561	446	158	436	195	248	185	423	319	537	3.08731e-08	6.73746e-07	0.222391	0.999913
ARHGAP32	661	387	544	345	351	370	399	305	263	341	654	546	0.257214	0.502157	0.830085	0.999913
ARHGAP33	140	56	49	56	77	53	108	67	100	74	158	86	0.047566	0.166351	0.416556	0.999913
ARHGAP35	1625	1110	1422	752	1003	1044	1205	914	821	955	1613	1378	0.852552	0.914851	0.561526	0.999913
ARHGAP36	0	6	0	1	0	4	0	3	0	7	0	2	0.362826	0.606529	0.821505	0.999913
ARHGAP39	332	307	450	251	281	244	259	258	297	220	380	337	0.0265128	0.106596	0.915713	0.999913
ARHGAP4	1	3	1	1	0	7	0	14	2	4	3	10	0.285941	0.531716	0.838273	0.999913
ARHGAP40	49	58	83	104	38	65	22	47	41	52	33	68	2.46684e-06	3.61964e-05	0.948539	0.999913
ARHGAP42	108	236	88	109	53	208	70	97	43	180	81	232	0.913483	0.951756	0.968199	0.999913
ARHGAP44	318	266	118	77	264	288	240	300	182	249	337	362	3.84949e-10	1.1089e-08	0.181084	0.999913
ARHGAP5	2571	1348	1289	995	1465	1180	1768	918	878	1107	2890	1623	0.488958	0.704796	0.956134	0.999913
ARHGAP6	0	4	0	1	1	2	0	5	0	6	0	6	0.292062	0.538787	0.960724	0.999913
ARHGAP8	0	1	0	0	0	0	0	1	0	1	0	1	0.446846	0.672266	0.834948	0.999913
ARHGAP9	0	4	2	5	2	10	0	8	0	7	0	8	0.535785	0.73386	0.328377	0.999913
ARHGDIA	4141	2352	3102	721	4138	2236	2669	1437	3479	1524	5791	3061	0.000276869	0.00238847	0.621393	0.999913
ARHGDIB	0	2	3	22	0	0	0	0	0	0	0	1	5.52033e-08	1.1512e-06	0.54867	0.999913
ARHGDIG	2	5	1	3	0	3	2	8	3	5	3	4	0.568041	0.757934	0.819333	0.999913
ARHGEF1	731	905	928	903	714	875	443	737	817	732	817	1233	0.020512	0.0874077	0.460556	0.999913
ARHGEF10	458	384	693	610	359	375	348	298	305	282	631	566	1.73842e-08	3.96798e-07	0.685403	0.999913
ARHGEF10L	230	207	175	154	184	170	160	164	206	187	281	241	0.56515	0.755156	0.319458	0.999913
ARHGEF11	753	846	1088	991	505	916	617	741	541	712	813	1093	2.19894e-05	0.000256245	0.658939	0.999913
ARHGEF12	2994	2452	3648	3002	1771	2141	1963	1513	1203	1999	3365	3283	5.1558e-05	0.000549586	0.636463	0.999913
ARHGEF15	0	0	0	0	0	0	0	1	0	1	1	2	0.359858	0.60395	0.44464	0.999913
ARHGEF16	370	372	184	248	297	385	351	474	429	338	478	549	0.00113175	0.00810181	0.963037	0.999913
ARHGEF17	622	895	167	235	377	1034	436	702	399	787	755	1372	1.11022e-16	6.05711e-15	0.412816	0.999913
ARHGEF18	672	754	682	571	506	700	477	622	582	665	818	1069	0.683309	0.820465	0.216241	0.999913
ARHGEF19	165	191	77	107	144	311	134	231	159	200	228	314	1.31985e-05	0.00016422	0.712737	0.999913
ARHGEF2	607	627	953	1243	408	757	333	610	504	653	584	951	3.63432e-12	1.34912e-10	0.322832	0.999913
ARHGEF25	0	0	0	0	0	2	0	0	0	1	0	0	0.507602	0.717336	0.812831	0.999913
ARHGEF26	94	68	34	19	80	78	65	53	62	76	108	102	4.2282e-06	5.91948e-05	0.750968	0.999913
ARHGEF3	275	287	160	101	178	338	202	233	146	260	282	381	0.000181634	0.00165997	0.561104	0.999913
ARHGEF33	4	5	1	1	0	9	0	6	1	8	3	5	0.200805	0.436754	0.555218	0.999913
ARHGEF35	125	109	77	83	64	137	88	93	106	82	142	146	0.303364	0.550748	0.718561	0.999913
ARHGEF37	50	142	10	10	30	115	68	150	41	121	41	138	2.73771e-09	7.09205e-08	0.293255	0.999913
ARHGEF38	2	1	0	0	2	6	0	4	2	3	4	1	0.0259978	0.104898	0.83893	0.999913
ARHGEF4	1	10	0	1	0	13	0	3	0	9	0	6	0.093642	0.267041	0.917113	0.999913
ARHGEF40	353	323	422	427	198	372	226	304	235	293	401	458	0.000220891	0.0019717	0.588303	0.999913
ARHGEF5	1866	1801	773	1462	1304	2268	1484	1684	1181	1525	2054	2698	0.00404153	0.0235101	0.371087	0.999913
ARHGEF6	34	68	47	41	16	56	20	52	15	49	37	60	0.144513	0.356901	0.926417	0.999913
ARHGEF7	1080	1038	1158	838	778	880	836	838	686	836	1147	1289	0.105277	0.289154	0.839904	0.999913
ARHGEF9	275	167	227	169	159	223	156	143	130	164	319	278	0.364206	0.607425	0.627824	0.999913
ARID1A	1631	1133	1297	975	1022	1080	1236	945	953	969	1776	1486	0.603606	0.771402	0.963505	0.999913
ARID1B	783	395	939	424	627	294	683	239	721	444	929	454	0.00656295	0.0351769	0.0592191	0.999913
ARID2	1562	836	1253	663	967	750	1151	592	606	678	1664	1080	0.610932	0.775319	0.777041	0.999913
ARID3A	304	335	211	241	157	334	154	294	144	269	252	484	0.91678	0.953481	0.909995	0.999913
ARID3B	280	215	190	205	177	255	200	291	169	224	255	350	0.631459	0.788568	0.38705	0.999913
ARID4A	300	447	316	302	169	510	195	364	132	378	284	641	0.302298	0.549841	0.639927	0.999913
ARID4B	621	593	600	570	422	540	467	488	297	547	699	777	0.0663209	0.210218	0.868636	0.999913
ARID5A	131	129	91	101	109	188	104	149	150	130	179	181	0.0722571	0.223248	0.963802	0.999913
ARID5B	814	252	8	2	277	334	406	259	162	270	399	388	1.51652e-10	4.58111e-09	0.128028	0.999913
ARIH1	2056	1586	1679	1251	1451	1075	1448	1283	1160	1314	2126	1944	0.503965	0.714496	0.790796	0.999913
ARIH2	2140	1792	1920	1396	2104	1745	1605	1717	1889	1597	2830	2565	0.561025	0.75182	0.788269	0.999913
ARL1	1195	1133	1568	1046	1093	1086	967	1042	946	1114	1825	2089	0.110106	0.298239	0.15006	0.999913
ARL10	0	5	0	1	0	1	2	1	1	3	0	3	0.406084	0.642004	0.828381	0.999913
ARL11	0	0	0	0	0	1	0	1	0	0	0	1	0.523321	0.726267	0.70861	0.999913
ARL13A	4	2	3	3	2	4	0	4	1	6	4	8	0.912905	0.95131	0.455321	0.999913
ARL13B	190	84	389	299	167	118	152	106	97	101	233	163	1.11022e-16	6.05711e-15	0.422881	0.999913
ARL14	0	1	1	2	0	3	0	2	0	0	0	4	0.288591	0.534514	0.738154	0.999913
ARL14EP	306	346	285	265	294	412	247	392	264	425	386	544	0.304582	0.551613	0.911717	0.999913
ARL14EPL	0	0	1	0	0	1	0	1	2	0	0	0	0.967244	0.982194	0.972753	0.999913
ARL15	174	138	130	37	103	112	173	98	86	80	179	160	0.0501353	0.172375	0.396408	0.999913
ARL16	169	164	187	140	161	259	168	194	164	160	220	280	0.752301	0.845733	0.343715	0.999913
ARL17A	259	153	127	158	107	150	141	144	130	162	288	228	0.779123	0.864959	0.128145	0.999913
ARL17B	64	50	30	17	39	63	41	38	12	39	79	48	0.0496498	0.171013	0.415302	0.999913
ARL2	593	317	555	326	450	286	465	248	543	201	846	386	0.119183	0.315093	0.558045	0.999913
ARL2BP	1082	1268	1202	951	981	1418	982	1351	1021	1268	1641	2061	0.630866	0.788046	0.597503	0.999913
ARL3	385	125	398	181	285	143	336	141	302	104	465	167	0.0104869	0.0512417	0.416381	0.999913
ARL4A	169	103	165	61	191	208	114	98	174	180	217	200	0.119422	0.315537	0.664109	0.999913
ARL4C	160	163	7	10	39	130	46	57	46	88	83	104	9.12037e-05	0.000906698	0.835087	0.999913
ARL4D	0	0	1	1	0	3	0	2	1	2	0	2	0.672049	0.818114	0.828536	0.999913
ARL5A	1140	819	1216	841	1003	981	928	719	619	660	1548	1212	0.0756166	0.230306	0.387036	0.999913
ARL5B	1192	911	792	813	614	1256	912	806	330	949	1227	1639	0.823776	0.895878	0.590586	0.999913
ARL5C	1	0	0	0	0	0	0	0	0	0	0	1	0.551619	0.743588	0.54867	0.999913
ARL6	92	66	81	24	86	79	91	62	57	40	135	87	0.0478094	0.166943	0.172178	0.999913
ARL6IP1	2981	3638	2616	4492	2434	7155	2298	4854	2568	3944	4262	6848	0.946955	0.971064	0.530372	0.999913
ARL6IP4	842	505	801	505	610	501	767	652	1101	508	1438	856	0.852967	0.915004	0.108043	0.999913
ARL6IP5	865	885	901	776	784	875	938	923	799	792	1379	1223	0.934374	0.963415	0.83988	0.999913
ARL6IP6	315	92	262	303	186	169	216	127	144	97	345	170	7.53017e-07	1.23136e-05	0.264925	0.999913
ARL8A	480	712	359	464	382	789	383	775	440	648	601	1073	0.0320762	0.12359	0.882619	0.999913
ARL8B	1095	1545	1645	1570	956	1191	945	1386	822	1286	1532	2228	0.000586807	0.0046322	0.574639	0.999913
ARL9	0	3	61	41	0	11	0	6	0	0	0	5	0	0	0.141055	0.999913
ARMC1	1268	797	1029	735	756	1007	1180	957	874	940	1886	1636	0.429332	0.659609	0.511495	0.999913
ARMC10	1011	834	1001	647	946	910	758	749	731	784	1237	1037	0.862959	0.921732	0.553393	0.999913
ARMC12	2	9	1	6	4	10	4	12	8	12	1	7	0.276042	0.521059	0.781048	0.999913
ARMC2	17	10	13	3	12	14	14	6	7	11	23	14	0.287511	0.533572	0.957668	0.999913
ARMC3	0	2	0	0	0	1	0	3	0	2	0	3	0.211748	0.450734	0.975292	0.999913
ARMC4	0	4	0	1	0	10	0	3	0	5	0	6	0.271733	0.517756	0.771859	0.999913
ARMC5	233	273	118	162	313	287	163	269	463	295	352	421	0.0357818	0.134379	0.323772	0.999913
ARMC6	638	537	744	597	652	491	528	479	789	424	883	703	0.0573735	0.189986	0.52766	0.999913
ARMC7	161	140	98	110	127	186	114	165	133	126	166	232	0.0878059	0.256092	0.618243	0.999913
ARMC8	598	428	747	456	541	443	517	383	433	405	813	641	0.0251579	0.102422	0.975221	0.999913
ARMC9	214	138	250	210	160	122	191	150	155	123	266	186	0.000785787	0.00594675	0.757911	0.999913
ARMCX1	3	7	3	3	1	4	2	11	3	8	3	5	0.732047	0.838751	0.953989	0.999913
ARMCX2	2	5	35	25	0	0	0	0	0	0	6	15	3.53073e-12	1.31337e-10	0.0332547	0.999913
ARMCX3	610	1307	780	1131	456	1572	424	1087	382	1179	801	2061	0.047984	0.167397	0.663985	0.999913
ARMCX4	112	136	196	143	101	116	75	118	87	139	104	154	0.000238077	0.00209909	0.986634	0.999913
ARMCX5	157	154	145	76	95	146	112	146	128	147	147	217	0.311146	0.557622	0.563035	0.999913
ARMCX5-GPRASP2	29	42	31	26	33	55	34	40	22	51	39	47	0.446234	0.67209	0.368298	0.999913
ARMCX6	294	345	334	177	316	486	243	341	286	358	411	504	0.0946825	0.269172	0.714373	0.999913
ARNT	770	701	635	493	509	724	536	557	343	597	735	987	0.972926	0.984921	0.455589	0.999913
ARNT2	366	272	371	162	261	306	295	244	278	316	539	459	0.277863	0.522934	0.136495	0.999913
ARNTL	244	268	195	232	142	252	164	193	150	202	299	335	0.458426	0.680179	0.492774	0.999913
ARNTL2	865	509	1493	922	767	436	904	496	562	497	1205	730	1.36684e-10	4.17095e-09	0.736294	0.999913
ARPC1A	2377	1607	3035	2036	2068	1726	1919	1736	2248	1417	3191	2506	0.00221919	0.0143514	0.772138	0.999913
ARPC1B	963	934	1774	1345	766	1019	692	769	846	706	1104	1145	1.1112e-10	3.43745e-09	0.901918	0.999913
ARPC2	2936	3146	3760	3616	2776	3143	2536	3237	3310	2758	4016	4567	0.013578	0.0630372	0.592167	0.999913
ARPC3	2409	1830	2960	2108	2163	1999	1850	1739	2425	1614	3387	2672	0.012561	0.0591393	0.46495	0.999913
ARPC4	1026	1048	1787	1411	998	1041	934	1084	1258	941	1447	1508	1.0777e-05	0.000136065	0.516319	0.999913
ARPC4-TTLL3	145	245	186	174	86	168	92	198	128	209	124	216	0.0884083	0.257307	0.599332	0.999913
ARPC5	1343	1271	1480	2150	1149	1677	1119	1268	1087	1068	1719	1992	5.78019e-05	0.000608932	0.498847	0.999913
ARPP19	4027	3268	3188	2522	3199	3559	3517	3213	2459	2906	5086	5390	0.297604	0.54463	0.593258	0.999913
ARPP21	0	0	0	0	0	1	0	1	0	1	0	2	0.410491	0.645345	0.907387	0.999913
ARR3	8	7	5	5	4	15	2	16	2	10	5	14	0.618299	0.778019	0.517771	0.999913
ARRB1	797	808	509	373	664	671	670	603	669	536	1149	1097	0.00054585	0.0043417	0.479181	0.999913
ARRB2	1383	903	1710	1287	1268	1051	1096	1006	1421	786	1876	1473	0.0014758	0.0101375	0.791583	0.999913
ARRDC2	231	321	226	217	227	371	208	363	208	286	326	528	0.20723	0.44517	0.717091	0.999913
ARRDC3	626	509	918	442	565	1223	478	666	418	911	818	1067	0.673566	0.819217	0.702289	0.999913
ARRDC4	724	879	253	391	596	787	614	859	502	704	818	1252	7.23528e-09	1.76032e-07	0.511308	0.999913
ARRDC5	0	1	0	0	0	0	0	3	0	0	0	0	0.455125	0.677364	0.222417	0.999913
ARSA	180	492	251	361	77	417	167	601	166	543	206	648	0.362356	0.60625	0.627116	0.999913
ARSB	240	160	240	111	257	185	255	123	194	142	400	204	0.408663	0.643651	0.626038	0.999913
ARSD	78	387	72	127	54	204	72	401	88	447	103	429	0.203343	0.440022	0.516597	0.999913
ARSE	0	0	0	1	0	3	0	1	0	5	0	1	0.79507	0.876298	0.74769	0.999913
ARSF	0	4	0	0	0	4	0	8	0	5	0	2	0.0646653	0.206169	0.539058	0.999913
ARSG	29	33	46	22	18	24	7	18	13	15	30	52	0.0391354	0.143531	0.371453	0.999913
ARSH	0	2	0	0	0	5	0	4	0	3	0	5	0.104126	0.286957	0.802376	0.999913
ARSI	0	0	0	0	0	1	0	2	0	3	0	3	0.260818	0.505628	0.702834	0.999913
ARSJ	438	279	379	273	442	200	468	221	304	220	626	326	0.452079	0.675114	0.559127	0.999913
ARSK	110	79	47	29	68	111	67	72	60	71	160	84	0.000412804	0.00340455	0.857252	0.999913
ART1	0	0	0	0	0	1	0	0	0	0	0	1	0.617881	0.777871	0.941844	0.999913
ART3	0	1	0	0	0	1	0	2	0	2	0	6	0.20876	0.446868	0.589935	0.999913
ART4	0	1	0	0	0	0	0	2	0	1	0	0	0.428485	0.659129	0.764512	0.999913
ART5	11	9	0	2	6	11	6	4	5	4	26	8	0.00540548	0.0300093	0.74138	0.999913
ARTN	3	2	2	0	2	6	0	3	3	8	3	2	0.271886	0.517884	0.532828	0.999913
ARV1	208	121	177	113	230	173	59	59	148	88	360	191	0.867008	0.924083	0.657119	0.999913
ARVCF	404	851	199	407	347	743	382	805	333	786	511	1273	3.04607e-06	4.38732e-05	0.79491	0.999913
ARX	0	1	1	0	0	0	0	1	0	3	1	1	0.854594	0.916118	0.311047	0.999913
AS3MT	4	17	1	1	0	10	1	12	2	12	0	27	0.0248993	0.101711	0.440781	0.999913
ASAH1	513	657	727	520	421	958	349	367	340	551	712	947	0.164878	0.387731	0.912822	0.999913
ASAH2	9	14	11	15	10	16	13	10	11	17	11	15	0.653024	0.803956	0.871818	0.999913
ASAH2B	72	68	61	72	83	81	78	76	38	87	97	79	0.984125	0.99012	0.145332	0.999913
ASAP1	4292	2124	1898	1519	2930	1137	2623	939	1992	1143	4857	2210	0.705576	0.823068	0.424929	0.999913
ASAP2	530	335	1135	1163	330	250	357	194	252	270	662	461	0	0	0.263668	0.999913
ASAP3	585	426	304	360	304	454	383	509	320	396	548	521	0.242869	0.487417	0.386722	0.999913
ASB1	932	948	3927	1432	710	591	660	572	566	552	1857	2161	3.74609e-08	8.06754e-07	0.198978	0.999913
ASB10	0	0	0	1	0	4	0	0	0	0	0	0	0.850361	0.913598	0.215206	0.999913
ASB11	0	2	0	1	0	2	0	0	0	3	0	4	0.780358	0.865708	0.456765	0.999913
ASB12	0	0	0	0	0	0	0	0	0	0	0	2	0.639689	0.792905	0.396455	0.999913
ASB13	329	297	265	198	306	324	232	286	288	243	208	285	0.596317	0.770606	0.203655	0.999913
ASB14	48	39	27	34	31	46	37	26	26	27	62	54	0.651852	0.803006	0.929569	0.999913
ASB15	0	9	0	1	0	10	0	3	0	5	0	14	0.132547	0.338253	0.79416	0.999913
ASB16	31	96	28	62	39	140	46	129	59	127	39	205	0.00986202	0.0488865	0.87722	0.999913
ASB17	0	1	0	0	0	4	0	3	0	1	0	1	0.228948	0.472457	0.369155	0.999913
ASB18	0	4	0	0	0	0	0	1	1	0	0	4	0.206444	0.444063	0.365695	0.999913
ASB2	0	3	0	1	0	1	0	0	0	0	0	1	0.891515	0.938481	0.941844	0.999913
ASB3	35	8	27	11	13	16	19	10	19	14	20	18	0.576093	0.761992	0.894527	0.999913
ASB4	0	2	0	1	0	2	0	3	2	5	0	7	0.326627	0.572654	0.223506	0.999913
ASB5	0	1	0	3	0	2	0	0	0	3	0	3	0.558353	0.749522	0.522817	0.999913
ASB7	339	317	329	295	217	330	202	257	186	329	323	482	0.118234	0.313179	0.520449	0.999913
ASB8	289	269	283	152	238	267	227	232	236	273	354	397	0.28092	0.52602	0.466836	0.999913
ASB9	0	3	0	0	0	8	0	1	0	3	0	1	0.149417	0.364513	0.59125	0.999913
ASCC1	386	377	318	290	310	329	390	430	377	328	514	580	0.235145	0.478925	0.897865	0.999913
ASCC2	728	765	671	630	724	692	582	656	847	681	921	1017	0.805101	0.883837	0.372393	0.999913
ASCC3	1868	2380	2628	1575	1929	2205	1680	1546	1260	1954	2496	3132	0.166777	0.389863	0.817774	0.999913
ASCL1	0	0	0	0	0	0	0	0	0	2	0	0	0.584636	0.762741	0.298183	0.999913
ASCL2	1	4	0	0	0	1	0	1	0	2	0	2	0.178774	0.408147	0.74832	0.999913
ASCL3	2	3	2	0	0	12	1	1	0	5	1	3	0.784121	0.868544	0.693484	0.999913
ASCL4	0	0	0	1	0	0	0	1	0	2	0	1	0.831515	0.901246	0.652019	0.999913
ASF1A	619	377	395	220	617	583	513	403	487	387	900	701	0.000118737	0.00114196	0.672507	0.999913
ASF1B	658	317	674	767	686	933	608	860	638	593	855	686	0.374237	0.616474	0.0129465	0.999913
ASGR1	34	67	33	72	26	80	19	64	25	48	30	129	0.287782	0.533717	0.972427	0.999913
ASGR2	0	0	0	0	0	1	0	2	0	0	0	1	0.452038	0.675114	0.541903	0.999913
ASH1L	1595	1376	1556	988	936	1036	999	770	562	1021	1210	1479	0.13107	0.335483	0.456268	0.999913
ASH2L	739	725	609	393	563	1015	558	844	573	780	877	1207	0.00966786	0.0480431	0.829818	0.999913
ASIC1	461	371	456	306	284	302	345	366	329	277	522	534	0.309088	0.555471	0.693025	0.999913
ASIC2	0	2	0	0	0	2	0	3	0	0	0	0	0.305271	0.552375	0.101613	0.999913
ASIC3	45	64	20	33	38	44	47	86	42	78	82	101	0.00337835	0.0202409	0.515915	0.999913
ASIC4	0	1	0	0	0	0	0	1	1	0	0	0	0.42309	0.654943	0.972112	0.999913
ASIC5	0	1	4	28	0	0	1	1	0	0	0	2	4.95619e-09	1.23589e-07	0.689242	0.999913
ASIP	2	5	2	2	4	6	2	7	2	6	9	8	0.26487	0.510405	0.838768	0.999913
ASL	330	301	319	386	274	263	269	371	406	369	451	455	0.347931	0.59314	0.229844	0.999913
ASMT (NC_000023 1713847..1762474)	0	0	0	0	0	1	1	3	1	1	1	8	0.101338	0.281775	0.587331	0.999913
ASMT (NC_000024 1663847..1712474)	1	1	0	0	0	1	0	3	2	2	0	2	0.127587	0.32954	0.566779	0.999913
ASMTL (NC_000023 1521531..1573155)	285	203	141	58	272	153	225	162	388	175	390	202	0.000396027	0.00328121	0.367136	0.999913
ASMTL (NC_000024 1471531..1523155)	314	191	141	77	216	143	240	186	322	179	369	260	1.8584e-05	0.000221141	0.196014	0.999913
ASNA1	994	984	1211	704	945	901	758	773	1071	758	1326	1323	0.517597	0.72362	0.31764	0.999913
ASNS	3764	819	1027	409	7099	2023	1679	1036	4736	1333	4705	1651	0.041783	0.151239	0.836062	0.999913
ASNSD1	871	822	1109	898	1036	944	777	944	813	892	1251	1323	0.149696	0.36491	0.703615	0.999913
ASPA	0	16	0	0	0	17	0	29	0	11	0	6	0.0221947	0.0929069	0.156727	0.999913
ASPDH	5	10	1	2	2	17	6	6	2	9	6	9	0.0371548	0.13801	0.516298	0.999913
ASPG	0	3	0	0	0	4	0	0	0	0	0	4	0.23015	0.473698	0.894025	0.999913
ASPH	4432	2841	4960	3456	3874	2020	3581	1777	3220	2144	6563	3292	9.4014e-05	0.000933092	0.235163	0.999913
ASPHD1	218	286	254	396	160	260	158	293	218	216	261	328	0.000477575	0.00385572	0.898891	0.999913
ASPHD2	186	168	165	144	173	150	162	167	167	130	251	240	0.911972	0.950732	0.956564	0.999913
ASPM	1812	901	2091	1498	1256	2692	1488	1239	636	1356	1994	1938	0.229974	0.473575	0.179081	0.999913
ASPRV1	8	7	7	3	5	9	6	7	9	9	8	11	0.47216	0.689839	0.692022	0.999913
ASPSCR1	164	172	152	114	164	216	173	198	205	157	214	230	0.093216	0.266615	0.479361	0.999913
ASRGL1	0	2	0	1	0	1	0	1	0	3	0	2	0.853637	0.915522	0.616943	0.999913
ASTE1	110	88	128	62	87	126	96	72	85	84	143	103	0.805251	0.883837	0.548653	0.999913
ASTL	0	3	0	0	0	2	2	3	0	0	1	1	0.129309	0.332464	0.227311	0.999913
ASTN1	0	3	0	3	0	2	0	11	0	9	0	9	0.610296	0.774846	0.853918	0.999913
ASUN	1023	443	1414	973	856	384	721	441	701	323	1158	634	2.49356e-13	1.03681e-11	0.652214	0.999913
ASXL1	1653	1267	2391	2284	1414	1273	1198	1176	1122	1081	1825	1899	1.31695e-10	4.03924e-09	0.718388	0.999913
ASXL2	1214	835	1374	810	614	519	879	411	357	671	1194	1041	0.0277366	0.110606	0.648457	0.999913
ASXL3	0	5	0	2	0	5	0	8	0	4	0	5	0.515196	0.721667	0.581554	0.999913
ASZ1	0	1	0	0	0	2	0	1	0	1	0	3	0.29997	0.546958	0.951953	0.999913
ATAD1	954	1019	907	915	705	874	949	946	626	892	1235	1387	0.438299	0.666662	0.783045	0.999913
ATAD2	5735	1472	6559	6419	3687	2706	3718	1905	2365	1486	6370	2714	7.83817e-14	3.44191e-12	0.281089	0.999913
ATAD2B	231	202	250	143	110	224	119	145	77	203	261	278	0.199874	0.435499	0.513999	0.999913
ATAD3A	1126	617	1125	531	890	532	934	633	1175	501	1436	776	0.594003	0.768388	0.659701	0.999913
ATAD3B	988	544	1272	683	959	403	897	566	1113	385	1295	752	0.00240142	0.0152613	0.875431	0.999913
ATAD3C	3	4	0	3	0	7	0	5	2	5	8	6	0.260459	0.50553	0.254171	0.999913
ATAD5	649	265	806	675	345	506	506	374	204	305	785	610	0.000436289	0.00357857	0.54247	0.999913
ATAT1	91	107	78	54	56	109	12	17	7	15	107	161	0.702669	0.823068	0.876818	0.999913
ATCAY	0	5	0	0	0	3	0	6	0	7	0	3	0.0600419	0.195903	0.96702	0.999913
ATE1	357	241	396	182	237	185	264	136	124	218	324	248	0.119922	0.316441	0.660526	0.999913
ATF1	398	310	545	357	341	359	325	283	295	253	508	467	0.00246717	0.015613	0.686572	0.999913
ATF2	569	548	631	462	430	623	407	536	299	477	666	792	0.166158	0.389317	0.409646	0.999913
ATF3	515	700	31	188	202	1190	116	839	214	740	240	1058	7.72761e-09	1.87252e-07	0.589561	0.999913
ATF4	5771	2701	4983	2083	7858	6295	3264	2578	6409	2630	7194	4596	0.359149	0.603389	0.613463	0.999913
ATF5	547	446	491	643	602	501	500	495	799	453	864	714	0.387627	0.627737	0.368663	0.999913
ATF6	1347	851	1447	1016	1127	688	1006	568	944	690	1609	1050	0.000557398	0.00441699	0.535218	0.999913
ATF6B	998	983	1198	602	679	771	774	860	1032	850	1374	1297	0.849337	0.912923	0.0422681	0.999913
ATF7	508	529	436	418	308	497	344	405	278	497	489	715	0.499815	0.711809	0.691386	0.999913
ATF7IP	771	633	828	725	690	941	716	548	375	630	860	989	0.117425	0.311679	0.0807792	0.999913
ATF7IP2	130	176	79	86	112	175	105	184	122	175	193	247	0.000906665	0.00672029	0.548374	0.999913
ATG10	35	33	52	36	31	35	48	31	31	35	67	62	0.345165	0.591055	0.655082	0.999913
ATG12	538	525	790	580	530	915	421	624	498	678	712	957	0.067086	0.211749	0.844654	0.999913
ATG13	1013	1266	974	989	969	1405	871	1416	893	1303	1242	2047	0.444017	0.670195	0.830061	0.999913
ATG14	498	475	427	341	317	573	352	430	305	458	442	728	0.805654	0.883966	0.712366	0.999913
ATG16L1	633	506	419	382	526	475	473	615	494	478	688	769	0.0772479	0.234018	0.735437	0.999913
ATG16L2	189	180	207	105	143	156	161	222	201	191	196	274	0.459889	0.680516	0.692137	0.999913
ATG2A	916	2575	662	1263	676	2837	614	2608	836	2290	948	3756	0.00193293	0.0127568	0.687673	0.999913
ATG2B	1101	1608	883	1117	726	1798	769	1354	499	1829	1180	2298	0.512591	0.719417	0.985099	0.999913
ATG3	657	432	727	450	595	527	558	476	718	463	985	675	0.484421	0.701128	0.433823	0.999913
ATG4A	181	312	186	188	174	375	156	344	202	340	290	480	0.0745527	0.228118	0.47946	0.999913
ATG4B	634	788	663	577	622	839	624	896	695	670	856	1196	0.392711	0.632292	0.710882	0.999913
ATG4C	253	96	242	164	242	142	214	124	228	114	287	190	0.0850617	0.250155	0.688925	0.999913
ATG4D	403	380	184	174	325	477	306	394	352	337	522	596	4.20028e-07	7.27832e-06	0.942559	0.999913
ATG5	638	386	700	445	455	330	523	389	613	355	826	510	0.0246054	0.100795	0.326314	0.999913
ATG7	525	411	414	369	441	324	358	327	472	307	520	462	0.499086	0.711557	0.840821	0.999913
ATG9A	2057	1704	1047	804	1484	1653	1303	1467	1749	1396	2417	2418	1.15461e-05	0.00014476	0.237717	0.999913
ATG9B	14	21	3	5	5	14	6	14	21	18	10	29	0.00900253	0.0454265	0.0758452	0.999913
ATHL1	995	1542	513	721	473	868	489	1144	452	738	1170	1615	0.284779	0.530032	0.612221	0.999913
ATIC	2508	1441	2665	1864	2535	1428	2170	1374	2529	1232	3247	2004	0.0119216	0.0566473	0.970262	0.999913
ATL1	27	40	39	49	29	53	40	36	13	45	42	60	0.181344	0.411614	0.318451	0.999913
ATL2	1438	960	1312	984	1296	1075	1146	926	841	862	1749	1322	0.268734	0.514747	0.211471	0.999913
ATL3	801	592	1121	854	620	802	625	551	604	680	957	1001	6.30058e-05	0.000656077	0.686676	0.999913
ATM	1041	1293	1376	1174	596	1315	672	944	375	1297	1069	1916	0.00109227	0.00785036	0.761567	0.999913
ATMIN	562	625	570	393	556	849	484	687	427	695	735	1040	0.133816	0.340175	0.508272	0.999913
ATN1	2572	2239	1759	1722	1868	2260	2095	2288	2524	2099	3108	3256	0.0762737	0.231847	0.404928	0.999913
ATOH1	4	0	0	0	2	2	0	0	2	0	5	1	0.0893773	0.259449	0.833691	0.999913
ATOH7	4	2	8	4	1	3	1	0	0	3	1	6	0.0524314	0.177606	0.811904	0.999913
ATOH8	21	33	0	0	25	59	22	39	19	31	13	16	2.36222e-08	5.25704e-07	0.00932147	0.999913
ATOX1	265	299	376	288	267	328	221	270	374	287	380	445	0.18911	0.422476	0.226326	0.999913
ATP10A	0	0	0	0	0	3	0	0	0	3	0	3	0.268206	0.514308	0.670345	0.999913
ATP10B	0	3	0	3	0	8	0	6	0	8	0	8	0.603085	0.771402	0.970911	0.999913
ATP10D	262	558	176	226	176	667	125	350	153	558	245	676	0.0601993	0.196275	0.714129	0.999913
ATP11A	1781	1205	1157	740	1035	1061	1187	851	798	1009	1816	1584	0.302836	0.550122	0.791445	0.999913
ATP11B	1320	1327	1382	1192	932	1326	842	916	496	1054	1383	1851	0.0302739	0.118155	0.651429	0.999913
ATP11C	1197	531	795	404	744	401	835	317	578	334	1279	591	0.805533	0.883901	0.977079	0.999913
ATP12A	0	1	0	1	0	1	0	0	2	2	0	2	0.777345	0.863664	0.199161	0.999913
ATP13A1	865	1166	552	528	864	1269	766	1341	988	1030	1266	1957	5.65439e-07	9.49642e-06	0.689073	0.999913
ATP13A2	1348	1580	335	831	1319	1634	1203	1665	1544	1425	1710	2121	4.80904e-12	1.7598e-10	0.970312	0.999913
ATP13A3	4331	4703	2876	4587	4228	4293	3384	2895	2478	4088	5277	6475	0.828472	0.899193	0.963773	0.999913
ATP13A4	0	1	1	1	0	3	0	2	0	4	0	5	0.612174	0.776004	0.695834	0.999913
ATP13A5	0	1	1	0	0	2	0	4	0	3	0	0	0.713397	0.826619	0.630221	0.999913
ATP1A1	9040	7745	7627	6699	8605	9531	8676	8530	8358	7523	12174	11974	0.265183	0.510681	0.535302	0.999913
ATP1A2	0	1	0	1	0	0	0	3	0	4	0	1	0.827813	0.898882	0.770285	0.999913
ATP1A3	600	413	434	249	530	457	527	391	773	364	792	530	0.0365008	0.136255	0.661438	0.999913
ATP1A4	1	0	0	0	0	1	0	1	0	1	0	6	0.223645	0.465708	0.535205	0.999913
ATP1B1	668	789	240	188	645	1000	389	617	568	751	1022	1442	3.13929e-11	1.05251e-09	0.228121	0.999913
ATP1B2	0	0	0	0	0	3	0	4	0	3	0	0	0.216446	0.456845	0.542728	0.999913
ATP1B3	2575	2224	2942	2255	2701	2237	2586	2347	2549	1667	3783	3147	0.202157	0.438663	0.403123	0.999913
ATP1B4	0	1	0	0	0	3	0	0	0	0	0	1	0.410857	0.645474	0.578939	0.999913
ATP2A1	51	72	49	55	32	68	53	102	70	84	67	143	0.370613	0.613424	0.348387	0.999913
ATP2A2	7533	5445	7569	6955	6286	4819	6073	4014	5769	5026	9670	7376	0.00198738	0.0130477	0.321654	0.999913
ATP2A3	0	4	0	1	0	5	0	5	0	8	0	10	0.214134	0.453828	0.591008	0.999913
ATP2B1	1186	769	712	454	1009	889	855	538	697	711	1519	1082	0.00494243	0.0278858	0.963751	0.999913
ATP2B2	1	6	1	1	1	10	1	8	1	7	1	8	0.221059	0.462731	0.658655	0.999913
ATP2B3	0	0	0	0	0	2	0	1	0	2	0	0	0.384151	0.624832	0.855829	0.999913
ATP2B4	509	524	546	665	204	585	287	309	195	464	446	667	0.000349738	0.002941	0.739543	0.999913
ATP2C1	2262	1784	1913	1856	1750	1598	1512	1295	1575	1609	2724	2393	0.11539	0.307865	0.252102	0.999913
ATP2C2	10	32	10	15	3	25	6	17	5	33	13	51	0.729985	0.83866	0.105331	0.999913
ATP4A	2	3	1	0	0	2	1	2	0	1	2	2	0.50528	0.715664	0.913382	0.999913
ATP4B	1	0	0	1	0	2	1	2	0	2	1	3	0.574732	0.76118	0.957035	0.999913
ATP5A1	10220	6760	8803	4764	8215	7203	8744	6938	9153	5346	13446	9973	0.209633	0.447819	0.911453	0.999913
ATP5B	14639	9850	11995	8956	12931	12049	12188	10323	14132	8859	21156	15429	0.429693	0.659972	0.815631	0.999913
ATP5C1	4341	2623	3951	2688	3779	2679	3716	2369	4057	1955	6513	3810	0.399617	0.637821	0.685189	0.999913
ATP5D	741	470	648	384	728	532	608	489	810	350	1034	717	0.378971	0.620441	0.974976	0.999913
ATP5E	1782	1276	3143	2145	1772	1516	1675	1292	2245	1136	3089	1960	2.48499e-07	4.53291e-06	0.394179	0.999913
ATP5F1	2695	2091	2872	1926	2583	2197	2429	2052	2558	1875	4005	3299	0.639363	0.792905	0.682651	0.999913
ATP5G1	447	322	784	461	654	328	628	375	847	323	924	483	0.13439	0.341071	0.661237	0.999913
ATP5G2	1693	1006	2848	1194	1816	1353	1430	981	1836	961	2161	1319	0.000272184	0.00235596	0.57735	0.999913
ATP5G3	2381	1834	2647	1743	2294	2038	2359	1842	2512	1522	3501	2790	0.514545	0.72098	0.936831	0.999913
ATP5H	1311	1146	1500	1223	1115	1195	1219	1131	1392	1006	1859	1602	0.10386	0.286564	0.670934	0.999913
ATP5I	1298	578	1021	509	1222	719	1117	610	1497	505	2228	856	0.244156	0.488855	0.54528	0.999913
ATP5J	867	609	1192	747	767	748	798	647	873	547	1337	961	0.00841286	0.0430055	0.837096	0.999913
ATP5J2	1790	1270	1925	1275	1760	1407	1584	1228	2113	1046	2900	1857	0.462237	0.682364	0.501816	0.999913
ATP5J2-PTCD1	458	407	295	213	474	439	369	345	362	309	665	557	0.00119389	0.00848593	0.653356	0.999913
ATP5L	1807	1559	2144	1693	1943	1833	1766	1561	2067	1381	3098	2445	0.252755	0.497551	0.712503	0.999913
ATP5O	1493	951	1602	977	1471	1097	1416	1000	1602	866	2452	1464	0.559949	0.750936	0.737708	0.999913
ATP5S	122	106	152	84	86	81	102	67	93	83	159	108	0.0983674	0.27667	0.555127	0.999913
ATP5SL	639	445	495	311	565	410	510	335	600	336	742	618	0.27472	0.519993	0.61796	0.999913
ATP6AP1	1340	2126	943	1009	1134	2300	967	1940	1320	1780	1615	2780	0.000472217	0.00382447	0.752718	0.999913
ATP6AP1L	4	5	5	9	4	10	7	11	7	15	9	9	0.965387	0.981025	0.801756	0.999913
ATP6AP2	1022	1735	1190	1350	813	2402	700	1741	769	1877	1226	2866	0.587993	0.7641	0.812812	0.999913
ATP6V0A1	1002	1705	1266	1724	763	1391	710	1206	674	1074	1222	2543	0.00197884	0.0130026	0.583169	0.999913
ATP6V0A2	232	203	352	239	149	187	151	162	145	219	258	264	3.21768e-05	0.000360268	0.306484	0.999913
ATP6V0A4	3	87	0	1	11	145	1	42	11	91	6	109	3.36899e-06	4.8101e-05	0.856691	0.999913
ATP6V0B	1255	1485	1142	1197	1277	1762	933	1301	1449	1233	1828	2347	0.388991	0.629066	0.368806	0.999913
ATP6V0C	1385	2069	1587	1412	1379	2269	1112	1949	1568	1473	1769	2986	0.791317	0.87372	0.949784	0.999913
ATP6V0D1	962	1371	1223	1334	880	1359	605	1070	941	992	1354	1835	0.0132083	0.0616709	0.296767	0.999913
ATP6V0D2	0	5	0	0	0	7	0	7	0	5	0	7	0.0370417	0.137727	0.731774	0.999913
ATP6V0E1	1489	2064	1415	1604	1573	1824	1292	1616	1812	1516	2470	2841	0.593069	0.767727	0.182793	0.999913
ATP6V0E2	0	3	0	0	0	1	0	2	0	5	0	2	0.165876	0.388959	0.565412	0.999913
ATP6V1A	1741	2377	941	1417	1131	2345	1276	2092	1010	1942	1961	3541	0.00326152	0.0196784	0.962287	0.999913
ATP6V1B1	1	7	1	3	0	8	1	7	3	9	0	8	0.511796	0.719277	0.673303	0.999913
ATP6V1B2	794	1334	1821	2411	666	1850	664	1460	652	1267	975	2204	3.80806e-14	1.70974e-12	0.528093	0.999913
ATP6V1C1	2502	3330	3755	4663	2011	3368	1948	2374	1474	2268	3023	4542	2.70127e-09	7.01785e-08	0.566398	0.999913
ATP6V1C2	16	17	7	2	13	20	5	13	21	20	32	33	0.00143142	0.00991206	0.0501713	0.999913
ATP6V1D	853	1352	1302	2149	752	1462	722	1280	721	1030	1341	2069	1.88079e-07	3.52727e-06	0.842223	0.999913
ATP6V1E1	1604	1833	987	1374	1196	1939	1146	1662	1189	1476	1865	2365	0.111102	0.299696	0.821531	0.999913
ATP6V1E2	53	60	61	50	72	66	63	64	60	53	44	54	0.866472	0.923699	0.0452458	0.999913
ATP6V1F	2316	3016	1680	1815	2225	3144	1624	2545	2358	2456	3182	3892	0.0114882	0.0550365	0.532682	0.999913
ATP6V1G2	5	3	11	7	6	6	0	3	5	6	5	5	0.088328	0.257157	0.7023	0.999913
ATP6V1G3	0	0	0	0	0	0	0	1	0	0	0	0	0.690541	0.820465	0.45129	0.999913
ATP6V1H	1236	1407	791	810	1071	1272	927	1235	1108	1001	1568	1918	0.0053779	0.0298931	0.769024	0.999913
ATP7A	282	330	238	171	155	371	187	230	96	324	306	435	0.532138	0.731512	0.971149	0.999913
ATP7B	438	389	241	179	233	247	271	252	211	235	461	440	0.107128	0.292871	0.492881	0.999913
ATP8A1	221	138	4	8	161	125	148	68	64	104	246	155	1.09024e-13	4.71843e-12	0.753942	0.999913
ATP8A2	0	7	0	1	0	8	0	2	0	7	0	19	0.127137	0.328781	0.316815	0.999913
ATP8B1	4	26	8	2	12	34	8	12	2	19	11	15	0.157553	0.377112	0.211838	0.999913
ATP8B2	144	241	160	159	113	166	127	180	95	190	248	351	0.875026	0.929287	0.183027	0.999913
ATP8B3	114	103	41	55	61	111	69	153	59	109	113	158	0.00101941	0.00740952	0.722955	0.999913
ATP8B4	3	9	2	4	5	24	2	15	4	22	10	23	0.0311843	0.120948	0.610278	0.999913
ATP9A	1402	990	279	301	920	727	969	600	641	638	1460	1039	7.59035e-08	1.53707e-06	0.71761	0.999913
ATP9B	190	143	183	100	147	109	175	109	155	136	217	200	0.907803	0.948368	0.443779	0.999913
ATPAF1	697	515	790	403	701	545	673	581	633	463	1070	729	0.898473	0.942829	0.583824	0.999913
ATPAF1-AS1	0	1	0	2	0	0	0	0	0	1	1	3	0.710501	0.824198	0.111633	0.999913
ATPAF2	193	203	94	78	157	197	130	198	146	164	215	278	3.2988e-05	0.000368205	0.887518	0.999913
ATPBD4	88	51	93	38	88	46	64	43	65	46	102	43	0.599779	0.771402	0.501019	0.999913
ATPIF1	1049	791	727	522	1074	1141	978	773	1116	651	1603	1092	0.00198788	0.0130477	0.403197	0.999913
ATR	766	681	1136	902	621	731	565	496	421	640	826	941	3.73413e-07	6.55257e-06	0.726102	0.999913
ATRIP	327	343	193	205	198	368	229	408	276	320	359	489	0.005911	0.0324002	0.764723	0.999913
ATRN	1230	1104	1545	1010	847	914	676	629	669	850	1194	1264	0.00012186	0.00116824	0.477655	0.999913
ATRNL1	0	2	0	0	0	4	0	8	0	6	0	3	0.0657908	0.20898	0.695337	0.999913
ATRX	1382	1118	1350	661	883	955	1109	621	448	818	1345	1502	0.669091	0.815722	0.630428	0.999913
ATXN1	154	127	9	5	49	66	96	69	49	124	146	164	2.70521e-08	5.96139e-07	0.162311	0.999913
ATXN10	939	794	1173	888	755	750	718	726	945	719	1551	1187	0.0171235	0.075915	0.0535577	0.999913
ATXN1L	1140	1091	865	629	719	1245	697	870	518	1025	1200	1694	0.18564	0.417471	0.857647	0.999913
ATXN2	893	664	910	553	690	490	633	475	598	462	1009	836	0.0846021	0.249374	0.665005	0.999913
ATXN2L	2934	2260	2376	2006	2384	2496	1905	2189	2528	1927	2453	2798	0.762104	0.852337	0.573043	0.999913
ATXN3	294	314	268	142	189	394	168	261	138	338	330	443	0.215152	0.455021	0.792635	0.999913
ATXN3L	0	1	0	1	0	0	0	0	0	2	0	1	0.827936	0.898882	0.229859	0.999913
ATXN7	660	523	532	411	364	513	432	394	261	523	639	764	0.633262	0.789944	0.749608	0.999913
ATXN7L1	169	180	89	55	105	157	109	125	79	165	200	216	0.000263657	0.00229318	0.521974	0.999913
ATXN7L2	176	107	200	136	159	135	120	144	182	126	199	175	0.13959	0.349586	0.829584	0.999913
ATXN7L3	1147	991	892	706	779	1123	869	1020	727	747	1129	1417	0.432884	0.661768	0.194056	0.999913
ATXN7L3B	2016	1752	1617	1094	1602	2051	1712	1949	1432	1774	2063	2634	0.0495859	0.170926	0.284732	0.999913
AUP1	1703	1620	1637	1131	1813	1787	1656	1821	2095	1546	2408	2408	0.0726963	0.224333	0.960243	0.999913
AURKA	1738	561	1950	1366	1483	1466	1378	1075	1386	684	2148	1241	0.00160156	0.0108482	0.0280682	0.999913
AURKAIP1	1065	606	1038	631	982	686	886	594	1324	529	1518	849	0.634608	0.790636	0.507378	0.999913
AURKB	1244	490	1029	984	1269	1179	880	817	1253	609	1629	942	0.289406	0.53567	0.230218	0.999913
AURKC	9	9	8	5	9	13	5	11	18	14	11	16	0.276809	0.522015	0.358883	0.999913
AUTS2	0	9	378	201	0	4	0	7	0	4	0	8	0	0	0.91185	0.999913
AVEN	75	72	73	80	72	54	79	73	109	68	117	93	0.616852	0.777871	0.344526	0.999913
AVIL	22	53	33	17	27	73	16	23	24	31	34	78	0.544778	0.739069	0.942984	0.999913
AVL9	418	398	461	336	244	401	269	272	230	358	444	582	0.0460811	0.162496	0.335861	0.999913
AVP	0	0	0	0	0	0	0	0	0	1	0	0	0.688371	0.820465	0.461794	0.999913
AVPI1	256	337	90	84	217	496	146	237	202	275	324	506	2.37177e-07	4.34841e-06	0.869535	0.999913
AVPR1A	0	7	0	0	0	7	0	3	0	8	0	6	0.0362316	0.135673	0.761345	0.999913
AVPR1B	0	1	0	0	0	2	0	1	0	0	0	4	0.311751	0.557819	0.999118	0.999913
AVPR2	0	0	0	1	0	1	0	0	0	0	0	1	0.628202	0.785701	0.941844	0.999913
AWAT1	0	0	1	0	0	0	0	0	0	0	0	1	0.405747	0.641906	0.54867	0.999913
AWAT2	0	0	0	0	0	1	0	1	0	0	0	0	0.585358	0.762741	0.303364	0.999913
AXDND1	62	110	42	43	38	57	43	55	33	74	85	122	0.219233	0.460318	0.140553	0.999913
AXIN1	843	540	615	341	677	489	620	549	756	435	924	729	0.0696581	0.217406	0.948293	0.999913
AXIN2	1346	191	37	18	346	140	871	115	367	121	1092	209	0.000521781	0.00417518	0.983374	0.999913
AXL	4737	3136	6754	1988	3999	2514	1901	2076	4065	2369	7323	4043	0.262546	0.507542	0.0860075	0.999913
AZGP1	0	1	0	1	0	1	0	4	0	3	0	3	0.707402	0.823068	0.979072	0.999913
AZI1	318	349	231	224	284	384	261	364	307	295	408	462	0.0328913	0.126129	0.737172	0.999913
AZI2	528	663	625	474	534	908	453	664	469	677	763	1040	0.685321	0.820465	0.78547	0.999913
AZIN1	4008	2730	6009	3815	3324	3781	2668	2415	2444	2602	5196	4474	1.0595e-06	1.67768e-05	0.911282	0.999913
AZU1	0	0	1	0	0	0	0	1	0	4	0	0	0.454556	0.676919	0.544016	0.999913
B2M	6754	8746	4344	6592	6336	12544	6265	10861	7233	9640	8774	13300	0.000916253	0.00677463	0.562256	0.999913
B3GALNT1	790	612	866	536	677	734	515	507	571	569	892	713	0.144316	0.356659	0.632015	0.999913
B3GALNT2	1007	793	728	556	770	869	692	721	511	835	1081	1240	0.195964	0.430573	0.83853	0.999913
B3GALT1	0	2	0	0	0	0	0	0	0	2	0	1	0.392742	0.632292	0.229859	0.999913
B3GALT2	0	0	0	0	0	1	0	0	0	0	0	0	0.709053	0.823068	0.482786	0.999913
B3GALT4	5	4	4	3	5	8	3	1	7	4	4	6	0.763163	0.853151	0.877957	0.999913
B3GALT5	0	1	0	1	0	0	0	0	0	1	0	1	0.737914	0.838751	0.342424	0.999913
B3GALT6	293	299	306	191	268	312	226	353	208	265	447	490	0.398418	0.636741	0.938224	0.999913
B3GALTL	275	204	110	105	192	237	198	157	158	191	258	262	0.000222637	0.00198433	0.549176	0.999913
B3GAT1	191	160	292	131	157	149	117	129	166	164	328	324	0.166583	0.389698	0.00436151	0.888992
B3GAT2	0	0	0	0	0	0	0	0	0	0	1	0	0.71761	0.829578	0.550554	0.999913
B3GAT3	281	336	230	218	229	390	240	504	314	264	348	515	0.142709	0.354109	0.611096	0.999913
B3GNT1	399	238	255	89	364	328	299	219	264	184	536	336	5.70207e-05	0.000602112	0.260956	0.999913
B3GNT2	368	351	408	466	284	467	257	352	245	389	445	510	0.00739672	0.0387462	0.903042	0.999913
B3GNT3	0	1	0	1	0	2	0	2	0	1	0	1	0.965645	0.981069	0.651772	0.999913
B3GNT4	4	4	10	3	8	10	6	14	3	10	10	16	0.82936	0.899723	0.622927	0.999913
B3GNT5	465	132	616	388	363	203	483	146	238	134	592	291	4.88764e-06	6.71221e-05	0.483935	0.999913
B3GNT6	0	0	0	0	0	3	0	1	1	0	0	1	0.302315	0.549841	0.846815	0.999913
B3GNT7	6	1	1	0	1	1	2	0	4	1	3	0	0.282992	0.527978	0.668431	0.999913
B3GNT8	0	1	0	1	2	5	0	3	1	2	1	6	0.292573	0.539229	0.816141	0.999913
B3GNT9	128	120	104	79	62	151	92	173	70	178	136	208	0.278074	0.523193	0.771549	0.999913
B3GNTL1	28	65	52	71	39	71	42	92	38	60	69	109	0.358357	0.602733	0.761076	0.999913
B4GALNT1	0	3	0	0	0	3	0	4	0	1	0	4	0.148339	0.362719	0.660564	0.999913
B4GALNT2	0	0	0	0	0	2	0	2	0	2	0	4	0.244975	0.489708	0.869628	0.999913
B4GALNT3	692	457	375	263	699	394	552	366	627	363	912	515	0.00129025	0.00908831	0.986915	0.999913
B4GALNT4	375	312	220	167	304	351	313	337	372	241	411	423	0.000637306	0.00498006	0.51779	0.999913
B4GALT2	685	441	501	331	651	455	566	440	719	480	984	691	0.0358529	0.134563	0.23397	0.999913
B4GALT3	903	754	779	450	871	820	736	668	809	680	1136	1114	0.0569212	0.18894	0.93661	0.999913
B4GALT4	397	229	351	259	240	328	227	237	236	252	409	397	0.193836	0.428322	0.719882	0.999913
B4GALT5	2187	1443	3237	3018	1762	1303	1533	1237	1382	1193	2678	2157	1.03251e-14	4.77873e-13	0.713605	0.999913
B4GALT6	154	128	1970	802	110	172	133	109	88	115	247	293	0	0	0.594908	0.999913
B4GALT7	178	229	228	230	139	180	124	225	173	211	209	341	0.0340285	0.129551	0.209021	0.999913
B9D1	113	76	153	90	97	69	136	96	143	99	190	131	0.320753	0.566548	0.276139	0.999913
B9D2	28	19	34	19	23	21	24	16	25	24	41	25	0.503112	0.714458	0.592569	0.999913
BAALC	0	1	0	1	1	4	0	2	0	3	1	6	0.411705	0.646064	0.915979	0.999913
BABAM1	767	562	1144	762	735	710	658	676	949	586	1048	873	0.00285583	0.0176507	0.721215	0.999913
BACE1	158	302	175	132	134	413	139	324	128	361	234	476	0.0344902	0.130719	0.866772	0.999913
BACE2	766	475	686	306	809	466	560	373	451	259	911	557	0.803338	0.882665	0.1178	0.999913
BACH1	746	786	743	999	673	995	459	592	398	806	774	1180	0.00533331	0.0296819	0.685244	0.999913
BACH2	0	3	0	0	0	9	0	6	0	6	0	10	0.031058	0.120536	0.919593	0.999913
BAD	355	275	263	158	314	362	293	285	384	238	552	446	0.00272985	0.0169887	0.617171	0.999913
BAG2	1325	861	1353	791	1300	1222	1092	918	1225	775	1999	1407	0.930042	0.96056	0.743544	0.999913
BAG3	964	1019	1397	858	1069	1264	782	1144	1144	971	1424	1500	0.343894	0.589835	0.967956	0.999913
BAG4	710	528	649	453	566	614	484	461	421	461	874	736	0.581133	0.762741	0.711638	0.999913
BAG5	941	657	1035	820	693	806	724	649	557	629	1076	1090	0.00600521	0.0328326	0.653236	0.999913
BAG6	3196	2937	3432	2582	2490	3114	2475	3084	2809	2735	4265	4688	0.500102	0.711991	0.438013	0.999913
BAGE2	0	1	0	0	0	3	0	1	0	7	0	7	0.125668	0.326562	0.287528	0.999913
BAHCC1	263	275	75	56	152	265	226	264	129	206	244	323	1.3739e-10	4.18539e-09	0.099231	0.999913
BAHD1	717	788	753	634	566	825	489	700	555	723	781	1157	0.420969	0.653316	0.686286	0.999913
BAI1	12	43	5	23	6	47	12	56	9	37	9	49	0.0921293	0.264795	0.278714	0.999913
BAI2	296	314	198	205	171	319	264	367	199	260	400	502	0.0387516	0.142617	0.974277	0.999913
BAI3	0	1	0	1	0	4	0	2	0	3	0	1	0.745049	0.840831	0.758853	0.999913
BAIAP2	377	473	307	177	364	542	331	460	379	438	509	708	9.92031e-05	0.000979196	0.926137	0.999913
BAIAP2L1	1120	1120	450	656	1021	1022	849	1174	954	913	1272	1531	6.75145e-06	8.96409e-05	0.65944	0.999913
BAIAP2L2	9	22	0	2	5	13	13	27	11	27	10	21	2.32091e-05	0.000268891	0.950179	0.999913
BAIAP3	39	126	15	47	24	159	23	153	31	102	30	108	0.0167331	0.0745515	0.0967427	0.999913
BAK1	842	1305	1309	1227	758	1541	603	1374	846	1392	1065	2080	0.0169416	0.0752571	0.401337	0.999913
BAMBI	123	163	71	24	153	304	101	165	123	212	187	212	6.96953e-06	9.23321e-05	0.610105	0.999913
BANF1	1911	872	2079	1010	2068	1195	1658	881	2182	809	2794	1240	0.264468	0.509959	0.762544	0.999913
BANF2	0	0	0	0	0	0	0	1	0	0	0	0	0.690541	0.820465	0.45129	0.999913
BANK1	0	6	0	3	0	9	0	5	0	5	0	10	0.573349	0.759795	0.917241	0.999913
BANP	167	112	175	156	95	115	97	117	123	110	160	177	0.00527976	0.0294658	0.408475	0.999913
BAP1	1378	1231	1227	975	1138	1361	1062	1205	1267	1142	1522	1780	0.648298	0.800052	0.904841	0.999913
BARD1	352	75	304	298	205	250	199	117	104	142	350	191	0.00478005	0.0271312	0.405669	0.999913
BARHL2	0	1	0	0	0	0	0	0	0	0	0	0	0.698547	0.821084	NA	NA
BARX2	0	2	0	0	0	0	0	0	0	1	0	0	0.497434	0.710563	0.461794	0.999913
BASP1	0	1	0	0	0	3	0	1	0	3	0	1	0.251662	0.496634	0.999499	0.999913
BATF	0	0	0	0	0	0	0	0	0	1	0	1	0.602823	0.771402	0.342424	0.999913
BATF2	6	3	3	9	0	6	0	1	3	4	0	6	0.148106	0.362443	0.320247	0.999913
BATF3	151	59	194	105	152	75	91	47	155	55	197	51	0.000248519	0.00218254	0.933699	0.999913
BAX	760	1711	1283	741	1407	2163	743	2122	898	1238	1418	2646	0.311751	0.557819	0.158683	0.999913
BAZ1A	2689	1739	2481	2033	2094	1460	2004	1284	1459	1268	2786	2063	0.00140934	0.00978169	0.390935	0.999913
BAZ1B	4846	2245	4964	2629	4107	2285	3672	1893	3066	1917	5833	3065	0.00675424	0.0360199	0.668532	0.999913
BAZ2A	4278	3807	3839	3023	2511	4035	2652	3062	1882	3267	4192	5431	0.247175	0.492053	0.81407	0.999913
BAZ2B	182	372	526	613	76	260	180	276	89	399	133	425	5.55778e-13	2.24859e-11	0.936988	0.999913
BBC3	105	324	71	53	123	282	54	379	100	283	122	441	1.12974e-05	0.000142138	0.914338	0.999913
BBIP1	114	83	84	116	100	97	114	63	128	81	174	157	0.613869	0.777658	0.210436	0.999913
BBOX1	1	1	0	1	0	3	0	1	0	1	0	1	0.81233	0.888275	0.668018	0.999913
BBS1	305	529	201	252	266	573	251	558	287	582	381	789	0.000108288	0.00105216	0.638145	0.999913
BBS10	317	321	443	333	199	392	198	264	123	321	318	456	0.000174443	0.00160527	0.623185	0.999913
BBS12	78	75	66	63	52	69	53	96	61	106	77	121	0.750133	0.844481	0.448888	0.999913
BBS2	469	430	392	347	346	458	414	514	329	439	572	730	0.399839	0.637821	0.841285	0.999913
BBS4	286	504	383	404	250	658	235	607	180	536	352	852	0.319254	0.565176	0.353544	0.999913
BBS5	0	1	0	0	0	2	0	3	0	1	0	3	0.238537	0.482583	0.766819	0.999913
BBS7	426	621	357	377	386	620	378	550	290	647	564	791	0.0934519	0.266726	0.828628	0.999913
BBS9	133	96	116	38	98	69	108	68	59	92	131	122	0.268554	0.51453	0.904066	0.999913
BBX	1708	906	1509	774	945	764	1240	533	655	795	1614	1121	0.236463	0.480223	0.946058	0.999913
BCAM	1084	1619	178	212	1153	2637	891	1541	1333	1283	1521	2420	4.88498e-15	2.35158e-13	0.689391	0.999913
BCAN	244	196	225	134	275	318	115	155	393	263	438	342	0.294574	0.541341	0.126538	0.999913
BCAP29	954	971	1416	1299	896	1102	910	1015	719	959	1209	1394	8.15635e-05	0.000819458	0.319346	0.999913
BCAP31	3139	2799	3641	2353	3047	2834	2927	3166	4072	2511	4695	4437	0.94857	0.97188	0.461082	0.999913
BCAR1	778	847	518	695	615	1046	473	816	735	795	949	1299	0.134314	0.340974	0.331645	0.999913
BCAR3	206	279	502	420	132	180	118	166	214	238	187	298	5.35549e-12	1.94396e-10	0.0635239	0.999913
BCAS1	2	4	0	1	0	2	0	4	0	5	1	5	0.262942	0.507763	0.504464	0.999913
BCAS2	779	721	658	639	744	1063	643	808	690	779	890	1248	0.304625	0.551613	0.505303	0.999913
BCAS3	125	145	48	38	109	89	95	79	79	111	159	154	3.8363e-06	5.41291e-05	0.451556	0.999913
BCAS4	195	155	144	159	189	121	116	132	180	139	217	180	0.573105	0.759584	0.603421	0.999913
BCAT1	0	8	0	4	0	13	0	9	0	8	1	13	0.375087	0.617226	0.993298	0.999913
BCAT2	801	508	545	365	788	480	735	435	909	370	1219	626	0.0449448	0.159603	0.776509	0.999913
BCCIP	1485	834	2902	1260	1477	710	1199	781	1469	737	2149	1225	9.12906e-10	2.48653e-08	0.325723	0.999913
BCDIN3D	70	106	108	108	63	103	64	130	52	98	91	130	0.0349146	0.132032	0.366269	0.999913
BCHE	0	2	0	0	0	1	0	4	0	0	0	2	0.256312	0.50128	0.469994	0.999913
BCKDHA	334	434	252	290	253	304	239	361	335	335	420	526	0.310522	0.557004	0.156976	0.999913
BCKDHB	207	121	170	108	134	116	169	122	177	108	260	139	0.923768	0.957375	0.837766	0.999913
BCKDK	1080	951	1101	771	914	1008	805	924	981	791	1254	1260	0.657873	0.807983	0.880307	0.999913
BCL10	344	791	2088	2069	295	979	234	837	302	735	413	1250	0	0	0.934728	0.999913
BCL11A	72	40	44	20	35	48	40	38	27	27	58	34	0.411863	0.646203	0.16769	0.999913
BCL11B	19	19	5	1	12	31	12	26	13	18	17	23	0.00014456	0.00136408	0.39794	0.999913
BCL2	114	110	162	135	114	143	89	66	88	121	190	193	0.0219623	0.0921054	0.288094	0.999913
BCL2A1	0	1	673	900	1	2	0	0	0	0	1	1	0	0	0.692793	0.999913
BCL2L1	2335	2060	1920	1320	3186	1379	2608	1809	3149	1770	3737	2668	0.0998375	0.279078	0.541513	0.999913
BCL2L10	1	2	0	0	0	0	0	0	0	2	0	1	0.300141	0.547103	0.229859	0.999913
BCL2L11	712	547	152	125	459	853	577	592	341	559	550	833	2.11495e-11	7.22535e-10	0.0102019	0.999913
BCL2L12	705	369	442	417	523	580	469	535	679	312	798	539	0.559758	0.750792	0.313159	0.999913
BCL2L13	406	443	485	552	331	426	298	421	278	437	370	570	0.00059228	0.00467079	0.550134	0.999913
BCL2L14	1	6	0	2	1	2	0	1	0	2	1	2	0.7032	0.823068	0.995794	0.999913
BCL2L15	5	11	4	5	8	9	1	6	10	4	6	11	0.53601	0.734033	0.805659	0.999913
BCL2L2	317	233	102	225	283	258	269	215	177	174	427	278	0.0449141	0.159525	0.126132	0.999913
BCL2L2-PABPN1	737	744	681	520	497	798	504	530	335	600	586	815	0.384772	0.625388	0.0795419	0.999913
BCL3	87	79	33	78	36	94	35	89	67	78	85	109	0.318018	0.563775	0.264541	0.999913
BCL6	119	326	115	209	67	513	99	352	68	411	106	403	0.701295	0.823068	0.424173	0.999913
BCL6B	0	0	0	0	0	3	0	1	0	1	0	1	0.357909	0.602449	0.668018	0.999913
BCL7A	418	386	372	257	305	300	316	359	337	331	447	528	0.662115	0.810712	0.567164	0.999913
BCL7B	565	412	607	319	566	487	482	476	513	340	709	628	0.832097	0.901768	0.312338	0.999913
BCL7C	369	192	332	199	370	274	309	250	459	198	573	314	0.557768	0.749015	0.805796	0.999913
BCL9	501	284	384	235	325	257	361	215	306	239	532	339	0.728084	0.837118	0.906689	0.999913
BCL9L	1015	2158	254	438	644	2159	764	1866	735	1606	1319	3220	0	0	0.476292	0.999913
BCLAF1	5059	3151	5011	3515	4417	3969	4121	2909	2836	2995	5940	4905	0.0781471	0.236067	0.223059	0.999913
BCMO1	0	1	0	0	0	1	0	1	0	0	0	2	0.414315	0.648017	0.894743	0.999913
BCO2	4	32	4	4	1	39	0	15	1	17	7	43	0.152559	0.369253	0.442855	0.999913
BCOR	303	158	1013	758	187	196	235	159	145	151	421	430	0	0	0.533679	0.999913
BCORL1	977	1084	638	851	710	1041	669	955	626	709	1005	1306	0.615109	0.777871	0.293654	0.999913
BCR	1301	1025	832	597	1371	950	1184	904	1210	783	1740	1393	0.00148751	0.0102054	0.711589	0.999913
BCS1L	548	416	480	139	679	462	499	456	715	422	792	600	0.000288528	0.00247837	0.918468	0.999913
BDH1	830	363	790	418	688	340	771	397	950	374	1365	500	0.488483	0.70448	0.186412	0.999913
BDH2	209	248	241	153	191	332	238	336	218	340	309	445	0.0824734	0.245251	0.946066	0.999913
BDKRB1	0	1	0	0	0	0	0	0	0	0	0	1	0.610306	0.774846	0.54867	0.999913
BDKRB2	0	1	0	0	0	2	0	2	0	1	0	3	0.267044	0.512948	0.897082	0.999913
BDNF	169	280	0	7	176	302	39	99	303	269	258	343	9.73189e-10	2.64273e-08	0.0921093	0.999913
BDP1	1782	1489	1745	1086	1066	1435	1410	1046	664	1371	1884	2057	0.436382	0.665065	0.811017	0.999913
BEAN1	6	5	0	0	1	7	0	1	2	7	7	13	0.00293563	0.0180509	0.0699859	0.999913
BECN1	798	1024	953	954	694	1087	662	1047	807	1113	1084	1636	0.340075	0.586523	0.253891	0.999913
BEGAIN	47	38	33	13	38	32	22	27	46	38	35	60	0.0849193	0.24999	0.264305	0.999913
BEND2	0	2	1	1	0	2	0	0	0	8	0	8	0.592297	0.767174	0.0927038	0.999913
BEND3	298	156	372	180	321	142	254	145	227	117	349	202	0.00992209	0.0491032	0.258007	0.999913
BEND4	0	0	0	0	0	11	0	2	0	6	0	8	0.107442	0.293311	0.980079	0.999913
BEND5	0	0	0	0	0	0	0	0	0	1	0	0	0.688371	0.820465	0.461794	0.999913
BEND6	0	2	0	1	0	5	0	2	0	3	0	7	0.49212	0.707417	0.858043	0.999913
BEND7	329	254	203	183	233	428	213	266	205	239	369	358	0.0537676	0.181245	0.250015	0.999913
BEST1	5	3	0	2	1	6	0	7	4	9	2	5	0.108318	0.295077	0.423298	0.999913
BEST2	0	2	1	0	0	0	0	1	0	3	1	4	0.971204	0.983938	0.183467	0.999913
BEST3	1	10	80	107	2	14	1	19	1	13	5	40	0	0	0.476983	0.999913
BEST4	0	6	1	5	0	21	0	12	2	9	0	27	0.513773	0.720347	0.805216	0.999913
BET1	452	373	458	294	546	493	438	535	453	498	748	764	0.0652856	0.207741	0.914674	0.999913
BET1L	704	837	674	577	498	919	519	997	607	915	869	1477	0.309552	0.555816	0.292508	0.999913
BET3L	0	0	0	0	0	0	0	1	0	0	0	0	0.690541	0.820465	0.45129	0.999913
BEX4	0	1	0	1	0	0	0	0	0	4	0	3	0.920656	0.955641	0.0720682	0.999913
BEX5	138	106	72	36	166	204	122	109	178	154	190	169	3.29572e-05	0.000368091	0.998136	0.999913
BFAR	1230	877	974	703	1011	899	799	769	990	820	1487	1399	0.515409	0.721854	0.269189	0.999913
BFSP1	4	11	13	22	5	32	10	11	7	16	12	11	0.137923	0.347272	0.513571	0.999913
BFSP2	0	2	0	0	0	2	0	3	0	7	0	8	0.0816702	0.243765	0.347503	0.999913
BGLAP	0	0	0	0	0	0	0	0	0	0	2	3	0.371493	0.614005	0.113399	0.999913
BGN	0	1	0	1	0	1	0	2	0	2	0	1	0.957811	0.976928	0.964675	0.999913
BHLHA15	64	51	39	40	47	29	45	30	47	55	52	65	0.728821	0.837697	0.269377	0.999913
BHLHB9	38	31	24	7	23	27	33	20	18	19	37	41	0.0566805	0.188496	0.699756	0.999913
BHLHE22	0	0	0	0	0	1	0	0	0	0	0	0	0.709053	0.823068	0.482786	0.999913
BHLHE40	337	1175	2409	2930	180	852	180	624	149	740	284	1639	0	0	0.472562	0.999913
BHLHE41	97	171	44	69	69	259	71	178	44	138	92	219	0.00135093	0.00944183	0.0293366	0.999913
BHMT	0	0	0	0	1	3	0	5	0	2	0	2	0.142744	0.354109	0.285914	0.999913
BHMT2	0	2	0	0	0	2	0	1	0	2	0	1	0.280431	0.525597	0.983388	0.999913
BICC1	0	6	0	0	0	6	0	0	0	1	0	7	0.116074	0.309172	0.952439	0.999913
BICD1	115	116	93	132	93	96	93	78	68	96	122	109	0.0819805	0.244359	0.585801	0.999913
BID	759	596	772	663	777	600	620	504	705	436	1024	792	0.0727808	0.224426	0.792133	0.999913
BIK	20	39	16	32	23	43	15	37	40	30	32	56	0.42722	0.658533	0.45243	0.999913
BIN1	648	510	410	287	534	727	518	577	615	516	786	786	0.000202932	0.00182953	0.776218	0.999913
BIN2	0	5	0	0	0	1	0	4	0	3	0	3	0.127749	0.329842	0.979072	0.999913
BIN3	83	71	153	65	60	42	64	40	72	52	104	92	0.000975255	0.00714399	0.137664	0.999913
BIRC2	869	1109	925	1536	597	1134	574	881	481	954	955	1705	5.19682e-05	0.000553303	0.705308	0.999913
BIRC3	58	307	166	2736	40	185	31	141	37	341	79	590	0	0	7.42942e-06	0.0102017
BIRC5	1552	382	1370	970	1543	1208	1461	985	1685	607	2308	1128	0.47303	0.690652	0.116943	0.999913
BIRC6	3172	2399	3574	1973	1849	1662	2121	1047	1114	1601	3277	2583	0.031861	0.12299	0.767351	0.999913
BIRC7	0	0	1	2	0	0	0	2	0	0	0	2	0.151203	0.367187	0.872172	0.999913
BIRC8	0	0	0	0	0	0	0	0	0	3	0	0	0.561959	0.75252	0.235298	0.999913
BIVM	716	582	963	542	724	605	706	578	524	475	997	878	0.0740363	0.227219	0.302363	0.999913
BIVM-ERCC5	214	361	249	368	251	178	178	384	274	308	258	415	0.313911	0.559766	0.795539	0.999913
BLCAP	663	1529	923	1509	638	1860	501	1885	612	1420	729	2371	0.0367009	0.136804	0.370167	0.999913
BLID	1	0	0	1	2	1	0	2	0	0	0	0	0.941251	0.967338	0.0493237	0.999913
BLK	0	2	0	0	0	0	0	0	2	0	0	1	0.308663	0.555174	0.165123	0.999913
BLM	779	270	782	759	711	543	647	414	547	335	970	443	2.09721e-06	3.11572e-05	0.03386	0.999913
BLMH	1250	772	716	542	1093	619	891	547	1056	602	1489	967	0.0645616	0.205887	0.376012	0.999913
BLNK	0	48	0	1	0	87	0	44	5	62	3	36	0.000343984	0.0029021	0.453552	0.999913
BLOC1S1	324	169	336	151	251	171	240	221	373	177	389	269	0.931606	0.961568	0.476342	0.999913
BLOC1S2	687	1284	759	638	853	1729	724	1600	847	1440	1050	2144	0.0016271	0.0109963	0.672441	0.999913
BLOC1S3	227	266	158	249	208	486	168	271	231	279	288	397	0.265895	0.511666	0.70206	0.999913
BLVRA	692	423	416	416	527	378	526	402	562	367	911	581	0.57678	0.761992	0.494386	0.999913
BLVRB	557	941	357	454	416	1065	420	996	537	901	743	1235	9.70761e-05	0.000961363	0.612892	0.999913
BLZF1	215	378	300	287	158	345	144	339	119	434	258	633	0.074228	0.227464	0.223375	0.999913
BMF	63	89	12	32	15	177	27	152	20	126	26	185	0.000401997	0.00332455	0.311467	0.999913
BMI1	2715	1270	1407	772	1648	1192	1357	798	1144	923	2891	1688	0.243277	0.487613	0.670555	0.999913
BMP1	244	464	250	377	188	481	189	423	204	432	188	485	0.331444	0.577278	0.38038	0.999913
BMP10	0	0	0	1	0	5	0	1	0	2	0	4	0.741753	0.838889	0.918935	0.999913
BMP15	0	2	0	0	0	3	0	0	0	0	0	1	0.36352	0.607126	0.578939	0.999913
BMP2	6	7	0	2	2	11	0	6	1	6	3	10	0.0633877	0.203428	0.991479	0.999913
BMP2K	397	428	456	311	295	536	247	314	182	432	469	650	0.260678	0.50562	0.927701	0.999913
BMP3	0	3	0	0	0	1	0	1	0	2	0	4	0.220271	0.461886	0.574347	0.999913
BMP4	0	2	1	3	0	0	0	0	0	2	0	3	0.142911	0.354355	0.141764	0.999913
BMP5	1	1	0	0	1	0	0	1	0	0	0	3	0.260157	0.505272	0.810933	0.999913
BMP6	1	3	0	1	0	6	0	4	2	2	0	5	0.262189	0.507074	0.873548	0.999913
BMP7	0	3	0	0	0	3	0	0	0	2	0	1	0.255188	0.500238	0.997631	0.999913
BMP8A	76	143	8	17	54	158	54	119	63	148	85	227	0	0	0.368462	0.999913
BMP8B	70	50	23	26	38	57	30	36	40	39	62	70	0.0177853	0.0784051	0.639903	0.999913
BMPER	1	1	0	1	0	3	0	5	0	3	0	3	0.481423	0.698556	0.719286	0.999913
BMPR1A	872	441	683	387	566	347	496	266	380	344	859	497	0.199004	0.433972	0.763092	0.999913
BMPR1B	0	5	0	0	0	1	0	2	0	5	0	5	0.110939	0.299448	0.398163	0.999913
BMPR2	410	597	409	274	232	538	242	383	145	576	371	795	0.932673	0.962283	0.640365	0.999913
BMS1	4373	2868	4110	3044	3721	2450	3316	2629	3636	2387	5368	4126	0.105111	0.288788	0.563747	0.999913
BMX	0	5	0	2	0	12	0	9	0	5	0	6	0.315254	0.560884	0.330575	0.999913
BNC1	0	1	0	0	0	1	0	0	0	0	0	5	0.360598	0.6044	0.543913	0.999913
BNIP1	190	108	230	134	176	127	138	106	179	96	265	150	0.0356406	0.133982	0.863495	0.999913
BNIP2	895	823	1072	1023	628	957	673	809	447	794	1034	1456	0.00095275	0.00699564	0.795261	0.999913
BNIP3	8	8	14	15	6	20	6	18	3	6	11	20	0.143459	0.355395	0.315293	0.999913
BNIP3L	1189	962	304	381	525	1025	832	871	564	966	991	1566	1.31442e-07	2.53914e-06	0.873442	0.999913
BNIPL	14	27	8	13	13	25	10	25	14	17	21	37	0.137166	0.346309	0.903182	0.999913
BOC	0	3	0	0	0	4	0	4	0	5	0	1	0.111276	0.300048	0.79581	0.999913
BOD1	593	402	466	290	592	568	511	416	497	305	811	596	0.0735063	0.22603	0.156296	0.999913
BOD1L1	952	1038	841	810	534	1125	593	680	361	898	920	1566	0.356303	0.601214	0.939812	0.999913
BOD1L2	0	0	0	0	0	0	0	0	0	0	0	1	0.740582	0.838751	0.54867	0.999913
BOK	502	488	505	307	403	486	349	430	379	358	593	731	0.802022	0.88161	0.884534	0.999913
BOLA1	0	1	1	1	1	2	0	3	0	4	0	2	0.786149	0.869885	0.698641	0.999913
BOLA2	264	179	381	174	323	182	239	182	332	188	486	299	0.35257	0.597035	0.209999	0.999913
BOLA2B	295	181	396	171	295	185	234	166	349	199	374	255	0.172075	0.398052	0.376448	0.999913
BOLA3	325	224	449	275	326	242	240	184	391	183	496	275	0.00502535	0.0282474	0.41804	0.999913
BOLL	0	0	2	2	1	5	0	1	0	7	0	3	0.371851	0.614301	0.992734	0.999913
BOP1	896	651	1386	475	938	551	782	660	1028	528	1185	907	0.16392	0.386184	0.800192	0.999913
BORA	430	145	484	269	401	397	327	299	358	269	595	382	0.260139	0.505272	0.487157	0.999913
BPGM	309	188	214	97	319	275	352	239	251	207	490	341	5.23433e-05	0.000556967	0.308604	0.999913
BPHL	194	224	183	112	189	213	211	227	197	216	272	317	0.0247622	0.101299	0.967311	0.999913
BPI	0	3	0	0	0	3	0	0	0	0	0	2	0.297799	0.544635	0.758711	0.999913
BPIFA1	0	0	0	0	0	1	0	2	0	1	0	0	0.432434	0.66146	0.612584	0.999913
BPIFA2	0	0	0	0	0	1	0	1	0	1	0	1	0.451088	0.674727	0.958344	0.999913
BPIFA3	0	1	0	0	0	1	0	0	0	0	0	1	0.527749	0.728294	0.941844	0.999913
BPIFB1	0	1	0	0	0	3	0	1	0	4	0	0	0.242751	0.487264	0.957769	0.999913
BPIFB2	0	1	0	0	0	0	0	0	0	1	0	0	0.577244	0.761992	0.461794	0.999913
BPIFB3	0	0	0	0	0	0	0	0	0	2	0	0	0.584636	0.762741	0.298183	0.999913
BPIFB4	0	0	0	1	0	1	0	4	0	3	0	4	0.718904	0.83037	0.897062	0.999913
BPIFB6	0	0	0	0	0	0	0	0	0	0	0	1	0.740582	0.838751	0.54867	0.999913
BPIFC	0	0	0	1	0	4	0	3	0	0	0	3	0.828245	0.899163	0.439668	0.999913
BPNT1	434	509	377	462	449	628	415	610	376	504	606	877	0.361454	0.605023	0.482028	0.999913
BPTF	1241	1207	1737	999	836	980	971	731	576	947	1416	1499	0.00163764	0.011051	0.866963	0.999913
BRAF	179	183	328	251	78	147	120	110	59	141	153	230	2.37537e-10	6.99936e-09	0.903936	0.999913
BRAP	622	567	532	403	473	625	447	577	424	531	603	855	0.542255	0.737424	0.597004	0.999913
BRAT1	572	480	497	390	643	613	579	596	743	470	883	710	0.0905717	0.262121	0.707157	0.999913
BRCA1	994	322	1367	1476	680	745	823	513	588	517	697	526	3.8307e-11	1.26779e-09	0.0229446	0.999913
BRCA2	716	426	658	830	430	1218	453	430	197	564	626	774	0.157631	0.377142	0.28744	0.999913
BRCC3	392	290	515	314	379	283	365	229	183	206	477	372	0.00728245	0.0382477	0.0718037	0.999913
BRD1	624	479	636	424	428	475	474	444	411	419	656	671	0.182178	0.412935	0.848981	0.999913
BRD2	2501	2921	3210	2274	2366	4110	2160	2954	2206	2898	3390	4374	0.620046	0.779099	0.54587	0.999913
BRD4	1287	998	1394	1041	987	922	823	849	841	765	990	1060	0.0010302	0.0074789	0.160863	0.999913
BRD7	1324	1034	1519	1022	770	765	1233	1245	1281	1038	2129	1645	0.389999	0.630187	0.245327	0.999913
BRD8	961	1313	880	806	870	2164	786	1691	739	1499	1289	2496	0.0154334	0.0699227	0.459227	0.999913
BRD9	561	672	645	375	464	706	429	591	528	579	571	892	0.74951	0.844106	0.989461	0.999913
BRDT	0	11	0	0	0	13	0	5	1	29	0	17	0.0298134	0.116903	0.212947	0.999913
BRE	349	234	427	139	316	155	244	133	428	176	613	325	0.988975	0.993002	0.000776913	0.295078
BRF1	512	570	392	207	426	641	391	641	471	479	525	745	0.000202235	0.00182417	0.37428	0.999913
BRF2	335	351	166	180	353	552	279	402	356	391	442	586	1.80835e-07	3.40204e-06	0.714766	0.999913
BRI3	531	757	553	647	553	1014	435	622	523	593	834	1126	0.990084	0.993506	0.952411	0.999913
BRI3BP	370	182	360	273	270	227	325	185	220	159	459	246	0.00552432	0.0305509	0.240319	0.999913
BRIP1	735	230	757	1252	471	518	496	343	274	301	893	498	2.28981e-11	7.77845e-10	0.412923	0.999913
BRIX1	1268	624	1268	793	1440	695	1140	715	1268	607	1812	987	0.198195	0.432846	0.730061	0.999913
BRK1	643	563	1655	1594	657	666	439	490	606	447	1010	878	0	0	0.54611	0.999913
BRMS1	649	529	764	366	668	896	536	606	762	509	911	858	0.3755	0.617643	0.634143	0.999913
BRMS1L	185	414	199	200	195	542	171	388	188	415	323	699	0.0138327	0.0639231	0.571537	0.999913
BROX	298	304	513	504	154	314	212	216	100	288	301	471	9.7089e-12	3.40076e-10	0.923787	0.999913
BRP44	321	284	344	336	291	325	307	327	301	267	529	476	0.268226	0.514308	0.804067	0.999913
BRP44L	132	181	248	149	133	251	175	287	240	280	248	323	0.996305	0.997579	0.436461	0.999913
BRPF1	646	715	629	561	539	870	550	751	599	721	787	1093	0.594002	0.768388	0.991064	0.999913
BRPF3	706	815	929	860	515	1109	540	786	453	811	892	1300	0.00941048	0.0469455	0.843532	0.999913
BRS3	0	0	0	0	0	0	0	1	0	0	0	1	0.60443	0.771402	0.909363	0.999913
BRSK1	306	424	187	221	224	392	272	518	258	404	333	589	0.000945937	0.00695129	0.738124	0.999913
BRSK2	326	272	411	248	270	275	306	308	262	188	321	334	0.0606728	0.197262	0.0479061	0.999913
BRWD1	1860	1482	1647	1075	1173	1225	1154	812	628	1200	1835	1717	0.347973	0.593155	0.997435	0.999913
BRWD3	415	424	405	369	166	322	315	287	122	345	443	488	0.11091	0.299448	0.955427	0.999913
BSCL2	536	464	248	156	468	679	493	535	537	466	788	814	3.95162e-12	1.46389e-10	0.998955	0.999913
BSDC1	1217	1531	700	978	859	1448	832	1612	884	1683	1438	2402	0.00267053	0.0166771	0.24916	0.999913
BSG	4571	3097	5607	4174	2679	2854	2619	2461	3283	1932	7652	5744	0.0124938	0.0588691	0.122537	0.999913
BSN	7	19	5	9	3	14	7	16	7	15	3	20	0.547727	0.741561	0.887647	0.999913
BSPH1	0	0	0	0	0	0	0	1	0	0	0	0	0.690541	0.820465	0.45129	0.999913
BST1	1	2	1	1	3	3	0	2	4	2	2	3	0.495266	0.708862	0.795433	0.999913
BST2	2292	2001	2311	1307	2053	2165	2303	2317	2846	1838	3273	2578	0.171217	0.396526	0.966651	0.999913
BTAF1	2475	1732	2346	1928	1415	1469	1626	1180	778	1404	2373	2292	0.0162048	0.0725928	0.806294	0.999913
BTBD1	1757	1625	2027	1554	1664	1656	1243	1476	1068	1386	2081	2213	0.0333459	0.127438	0.374635	0.999913
BTBD10	542	1281	946	1098	550	1252	406	1254	481	1299	716	1954	0.00547501	0.0303298	0.548876	0.999913
BTBD11	104	90	35	15	66	85	72	74	58	74	89	104	4.41629e-07	7.57247e-06	0.578355	0.999913
BTBD16	1	1	0	1	0	1	0	0	0	0	0	4	0.915386	0.952911	0.619115	0.999913
BTBD17	0	3	0	0	0	2	0	6	0	0	0	4	0.14672	0.360423	0.437664	0.999913
BTBD18	2	3	0	0	3	10	3	8	1	7	7	7	0.00191573	0.0126711	0.684394	0.999913
BTBD19	5	41	4	58	4	41	3	95	4	30	6	121	0.896024	0.941301	0.955044	0.999913
BTBD2	481	461	411	191	315	385	414	471	424	381	450	558	0.0309937	0.120365	0.834288	0.999913
BTBD3	644	482	744	400	427	478	386	407	277	423	532	582	0.0078387	0.0405074	0.251304	0.999913
BTBD6	615	384	469	150	469	481	410	425	481	348	785	606	0.000538216	0.00428953	0.885621	0.999913
BTBD7	750	648	755	468	458	738	523	491	345	601	732	982	0.351349	0.59599	0.816954	0.999913
BTBD8	22	14	9	10	3	17	12	12	1	15	12	9	0.875986	0.929626	0.415862	0.999913
BTBD9	293	298	323	133	228	228	208	170	181	218	323	353	0.936537	0.964702	0.614102	0.999913
BTC	0	0	4	3	0	0	0	0	0	0	0	0	0.000518237	0.00415235	NA	NA
BTD	45	48	30	23	41	76	42	43	42	57	66	82	0.010488	0.0512417	0.862359	0.999913
BTF3	7229	5191	8677	4867	7023	6231	6084	5208	7906	5131	11368	8443	0.490357	0.706045	0.317696	0.999913
BTF3L4	1333	596	822	502	1248	637	1042	614	997	503	1774	923	0.0835388	0.247374	0.687851	0.999913
BTG1	313	442	230	187	199	1002	171	617	204	662	254	825	0.0846876	0.249544	0.563663	0.999913
BTG2	597	2941	280	724	901	3457	568	3529	870	2960	903	4686	0	0	0.7814	0.999913
BTG3	960	867	347	371	895	953	684	929	763	828	1434	1409	2.54606e-11	8.63264e-10	0.62076	0.999913
BTG4	1	0	0	3	0	3	0	1	0	2	0	1	0.619589	0.778823	0.847212	0.999913
BTK	1	4	0	1	0	2	0	1	0	4	0	2	0.542855	0.737904	0.652027	0.999913
BTLA	1	7	0	1	0	4	0	7	0	9	0	10	0.123624	0.322664	0.614455	0.999913
BTN1A1	0	0	0	0	0	3	0	2	0	2	0	4	0.22226	0.463795	0.987387	0.999913
BTN2A1	516	549	407	318	398	637	347	574	364	513	581	775	0.0668588	0.211217	0.736434	0.999913
BTN2A2	297	432	180	295	235	450	288	501	215	467	360	599	0.00913012	0.0458518	0.491782	0.999913
BTN3A1	169	167	68	26	129	239	190	183	87	196	223	263	8.4479e-10	2.32563e-08	0.249486	0.999913
BTN3A2	468	320	294	43	649	395	703	436	463	347	780	504	2.89262e-07	5.18712e-06	0.0393209	0.999913
BTN3A3	64	57	44	28	47	58	72	107	35	72	63	65	0.146236	0.359662	0.216653	0.999913
BTNL10	0	0	0	0	0	1	0	2	0	1	0	2	0.360745	0.604453	0.914323	0.999913
BTNL2	0	1	0	0	0	0	0	1	0	0	0	0	0.578695	0.762196	0.45129	0.999913
BTNL3	0	0	0	0	0	1	0	1	0	0	0	2	0.4722	0.689839	0.894743	0.999913
BTNL8	0	3	2	9	0	4	0	3	0	4	0	4	0.0212144	0.0896161	0.979391	0.999913
BTNL9	0	6	334	388	0	2	0	2	0	0	9	30	0	0	0.13542	0.999913
BTRC	697	505	569	394	517	410	532	418	428	447	769	665	0.938187	0.965593	0.86096	0.999913
BUB1	2326	774	2582	2074	1748	1910	1915	1470	1519	1097	3016	1671	0.00023472	0.00207152	0.0577939	0.999913
BUB1B	2969	683	2365	1459	2507	1392	2415	1061	2018	838	3677	1385	0.0157608	0.0709747	0.0857201	0.999913
BUB3	2747	3005	4936	4136	2796	4448	2304	3608	2704	3480	3870	5332	4.27227e-05	0.000465952	0.949565	0.999913
BUD13	576	254	552	353	473	307	441	291	498	235	694	409	0.0463585	0.163174	0.897067	0.999913
BUD31	1049	767	1001	758	983	948	768	894	1143	678	1547	1224	0.969077	0.982944	0.656187	0.999913
BVES	0	4	0	0	0	8	0	2	0	1	0	6	0.0927521	0.265847	0.61245	0.999913
BYSL	881	765	714	606	1057	754	622	712	942	680	1282	1085	0.260524	0.505566	0.693273	0.999913
BZRAP1	0	2	0	0	0	3	0	0	0	1	0	8	0.186202	0.418285	0.5446	0.999913
BZW1	2955	2046	4275	2788	2461	2481	2565	1971	1934	1788	3868	3101	9.29274e-06	0.00011891	0.385465	0.999913
BZW2	1961	1104	2663	1675	2019	1036	1581	1061	2091	854	2869	1497	7.91592e-06	0.000103349	0.748868	0.999913
C10orf10	1	1	2	1	0	0	2	0	2	1	0	4	0.697155	0.821084	0.343278	0.999913
C10orf105	0	2	0	0	0	0	0	1	0	2	0	1	0.345959	0.59164	0.652019	0.999913
C10orf107	0	2	0	1	0	0	0	2	0	0	0	2	0.95705	0.976688	0.872172	0.999913
C10orf11	18	9	22	9	12	8	10	7	14	10	24	7	0.318494	0.564387	0.611127	0.999913
C10orf111	5	2	1	8	1	2	1	2	1	3	2	1	0.205507	0.442913	0.956266	0.999913
C10orf114	243	107	31	23	96	70	117	69	87	52	176	110	0.000416309	0.00342901	0.844626	0.999913
C10orf116	68	110	73	87	83	228	68	140	106	157	50	89	0.597656	0.771159	0.443574	0.999913
C10orf118	463	743	332	303	233	763	343	589	124	722	489	1210	0.0636539	0.203919	0.914277	0.999913
C10orf12	364	292	402	266	191	289	229	146	111	248	353	340	0.0310553	0.120536	0.983758	0.999913
C10orf120	0	0	0	0	0	0	0	2	0	1	0	2	0.403893	0.640508	0.929037	0.999913
C10orf122	0	0	0	0	0	0	0	0	0	0	0	1	0.740582	0.838751	0.54867	0.999913
C10orf129	0	0	0	0	0	0	0	1	0	1	0	0	0.572092	0.758968	0.996935	0.999913
C10orf131	4	1	1	1	1	2	3	0	4	2	5	4	0.421649	0.653747	0.327595	0.999913
C10orf137	662	495	480	431	523	485	558	465	439	448	877	657	0.604549	0.771466	0.825675	0.999913
C10orf2	844	753	988	580	986	664	722	805	877	742	995	952	0.857351	0.917724	0.754922	0.999913
C10orf25	13	34	59	88	14	47	12	61	11	45	42	58	2.57693e-07	4.67692e-06	0.767557	0.999913
C10orf32	140	499	109	202	263	625	173	528	185	474	276	872	1.18087e-07	2.3084e-06	0.477121	0.999913
C10orf35	413	418	169	220	404	517	396	424	452	344	609	675	7.25667e-08	1.4796e-06	0.945211	0.999913
C10orf47	124	146	115	95	130	170	112	130	110	117	178	215	0.252867	0.497716	0.691516	0.999913
C10orf54	0	0	0	1	0	2	0	0	0	0	0	0	0.64487	0.797503	0.321094	0.999913
C10orf55	3	2	8	8	2	5	0	3	1	3	6	7	0.0387901	0.142645	0.544647	0.999913
C10orf57	37	26	55	36	34	31	42	32	54	33	35	29	0.120845	0.318176	0.864065	0.999913
C10orf67	0	1	0	0	0	0	0	1	0	1	0	1	0.446846	0.672266	0.834948	0.999913
C10orf68	2	5	7	8	3	12	3	6	3	13	0	5	0.196699	0.43119	0.585764	0.999913
C10orf71	0	1	0	1	0	1	0	0	0	0	0	1	0.728052	0.837118	0.941844	0.999913
C10orf76	284	283	424	352	217	189	210	197	231	209	351	376	4.34591e-06	6.07954e-05	0.16663	0.999913
C10orf82	4	2	1	0	2	1	3	2	2	2	4	5	0.141622	0.352583	0.713045	0.999913
C10orf88	122	153	62	87	74	134	29	53	78	133	118	173	0.466423	0.685594	0.079297	0.999913
C10orf90	0	1	0	0	0	3	0	5	0	7	0	8	0.0679599	0.213571	0.5979	0.999913
C10orf91	0	1	0	0	1	1	0	0	0	0	0	1	0.388748	0.628804	0.567132	0.999913
C10orf95	5	7	8	1	1	5	7	3	7	8	21	14	0.363516	0.607126	0.0444562	0.999913
C10orf99	0	1	0	1	0	1	0	2	0	0	0	0	0.839435	0.906393	0.202367	0.999913
C11orf1	53	82	126	107	39	72	49	98	93	116	97	135	0.0179921	0.0790844	0.0317617	0.999913
C11orf10	544	438	624	384	532	539	564	502	645	496	823	734	0.724126	0.834379	0.601035	0.999913
C11orf16	6	12	4	0	4	7	3	7	0	5	0	8	0.345232	0.591056	0.108028	0.999913
C11orf20	0	0	1	3	1	3	0	3	1	4	1	2	0.609145	0.774846	0.883147	0.999913
C11orf21	0	0	0	0	0	1	0	2	0	0	0	0	0.49956	0.711695	0.202367	0.999913
C11orf24	578	600	469	447	544	602	492	707	639	611	755	831	0.0911417	0.263178	0.811304	0.999913
C11orf30	713	645	531	514	382	712	467	526	307	565	702	1052	0.934406	0.963415	0.933925	0.999913
C11orf31	631	523	610	368	593	620	525	504	599	362	788	726	0.502086	0.713948	0.372596	0.999913
C11orf34	1	3	0	4	0	4	0	1	0	4	0	6	0.835075	0.903391	0.621615	0.999913
C11orf35	21	37	14	29	17	40	11	51	13	30	33	97	0.365728	0.608893	0.603741	0.999913
C11orf41	205	150	502	237	146	113	124	77	79	78	314	184	2.19382e-10	6.49631e-09	0.725685	0.999913
C11orf42	4	0	7	4	5	4	6	0	3	0	6	6	0.266775	0.512704	0.791156	0.999913
C11orf45	1	3	33	19	0	1	5	3	0	0	0	1	3.96605e-12	1.46622e-10	0.0747105	0.999913
C11orf48	757	566	774	508	847	781	676	523	948	519	1225	759	0.72723	0.836468	0.980216	0.999913
C11orf49	269	133	315	119	200	124	235	115	299	114	273	150	0.242389	0.486941	0.855234	0.999913
C11orf52	13	9	0	0	7	15	6	10	7	11	7	8	1.85354e-05	0.000220708	0.545425	0.999913
C11orf53	0	0	0	1	0	0	0	0	0	2	0	0	0.666024	0.812875	0.298183	0.999913
C11orf54	180	207	226	160	170	206	139	226	110	183	227	322	0.353313	0.597853	0.514873	0.999913
C11orf57	924	728	788	582	740	740	672	666	597	686	947	997	0.982109	0.988948	0.64178	0.999913
C11orf58	2436	1658	2563	1687	2119	2017	1968	1733	1951	1592	3232	2673	0.293611	0.540057	0.925094	0.999913
C11orf63	61	50	12	20	37	75	28	39	41	51	50	64	8.77533e-05	0.000875781	0.971272	0.999913
C11orf65	10	4	7	1	2	8	6	2	4	6	6	11	0.568365	0.758007	0.689108	0.999913
C11orf67	78	84	50	64	71	132	49	113	75	96	84	116	0.0784039	0.236684	0.519774	0.999913
C11orf68	241	335	509	137	254	346	176	327	276	367	395	469	0.393609	0.632951	0.173176	0.999913
C11orf70	0	1	0	0	0	1	0	1	0	1	0	1	0.397012	0.635643	0.958344	0.999913
C11orf71	39	49	17	47	32	79	20	34	22	33	39	56	0.661306	0.810163	0.376742	0.999913
C11orf73	274	143	306	169	230	146	286	156	272	154	408	219	0.212438	0.451668	0.629121	0.999913
C11orf74	90	55	126	44	95	59	99	43	108	59	119	54	0.464634	0.683991	0.908029	0.999913
C11orf75	144	66	132	80	162	78	132	89	144	66	190	99	0.785699	0.869663	0.413069	0.999913
C11orf80	131	127	107	90	96	117	108	126	88	117	148	171	0.56041	0.751219	0.82855	0.999913
C11orf82	626	508	619	861	611	1406	503	919	416	768	840	1160	0.621527	0.78066	0.0426406	0.999913
C11orf83	221	68	152	37	247	80	169	75	234	82	301	77	0.00685609	0.0364551	0.953667	0.999913
C11orf84	672	492	585	469	631	656	569	570	678	412	890	673	0.742983	0.83929	0.324234	0.999913
C11orf85	0	2	0	0	0	2	0	3	0	3	0	4	0.160978	0.382253	0.88332	0.999913
C11orf86	0	0	0	0	0	1	0	0	0	0	0	2	0.549434	0.741948	0.872885	0.999913
C11orf87	0	0	0	0	0	1	1	1	0	0	0	1	0.38341	0.624007	0.384377	0.999913
C11orf88	1	0	0	0	0	0	0	0	0	0	0	1	0.551619	0.743588	0.54867	0.999913
C11orf9	461	620	308	327	421	813	347	734	275	443	344	540	0.19238	0.426323	5.54153e-06	0.00824348
C11orf91	18	21	11	13	9	13	4	12	4	10	17	22	0.798512	0.878754	0.732141	0.999913
C11orf93	9	7	20	15	3	9	4	7	4	11	4	3	0.00170277	0.0114433	0.818988	0.999913
C11orf94	1	0	0	0	0	3	0	0	0	1	1	0	0.287614	0.533572	0.978761	0.999913
C11orf95	317	450	261	272	224	477	261	427	243	403	402	737	0.0955641	0.270737	0.589217	0.999913
C12orf10	427	295	480	275	379	338	308	295	458	313	540	444	0.454775	0.677178	0.324265	0.999913
C12orf23	675	1481	975	945	496	2002	623	1960	447	1547	948	2682	0.68469	0.820465	0.498878	0.999913
C12orf26	16	27	38	20	26	27	17	26	22	16	24	36	0.22142	0.463217	0.532914	0.999913
C12orf28	1	5	1	2	0	6	0	9	0	2	1	4	0.878811	0.93115	0.478379	0.999913
C12orf29	293	287	319	249	327	454	264	288	249	312	464	582	0.563127	0.753571	0.934257	0.999913
C12orf32	286	232	241	257	241	430	217	359	257	289	305	447	0.610952	0.775319	0.361977	0.999913
C12orf35	735	639	559	412	465	824	491	508	257	740	712	830	0.548022	0.741849	0.548754	0.999913
C12orf39	0	0	0	0	0	0	0	0	0	1	1	1	0.466633	0.685594	0.192695	0.999913
C12orf4	569	451	439	550	487	555	392	517	364	469	466	553	0.19777	0.432343	0.0503287	0.999913
C12orf40	0	1	0	0	0	1	0	0	0	1	0	0	0.502468	0.713948	0.970692	0.999913
C12orf42	0	1	0	0	0	1	0	1	0	1	0	1	0.397012	0.635643	0.958344	0.999913
C12orf43	300	194	303	151	310	206	263	191	272	190	404	257	0.743742	0.839859	0.767355	0.999913
C12orf44	595	636	566	572	510	648	434	648	585	567	703	1032	0.805291	0.883837	0.45927	0.999913
C12orf45	212	341	230	158	218	517	158	383	233	350	323	550	0.014832	0.0677412	0.914104	0.999913
C12orf49	810	1220	699	804	588	1353	576	836	431	1016	958	1811	0.650937	0.802264	0.918508	0.999913
C12orf5	711	2096	837	1099	930	2189	621	2033	682	1941	978	2734	0.122029	0.320125	0.373004	0.999913
C12orf50	0	2	0	2	0	4	0	1	1	0	0	4	0.973976	0.985274	0.888573	0.999913
C12orf51	1022	1268	766	779	573	1054	725	783	472	1019	1012	1509	0.767012	0.855973	0.765439	0.999913
C12orf52	332	271	287	163	379	430	248	238	351	257	508	440	0.0303105	0.118247	0.98738	0.999913
C12orf53	5	3	6	12	0	5	4	7	6	9	4	4	0.109018	0.29657	0.552225	0.999913
C12orf54	0	0	0	0	0	2	0	0	0	1	0	0	0.507602	0.717336	0.812831	0.999913
C12orf55	0	1	90	31	0	1	0	2	1	0	0	3	0	0	0.768222	0.999913
C12orf56	0	2	0	1	0	4	0	2	0	2	0	3	0.67914	0.820465	0.815868	0.999913
C12orf57	739	511	639	500	739	857	747	688	1009	634	1248	905	0.169975	0.394715	0.695662	0.999913
C12orf59	0	2	0	0	0	1	0	1	0	2	0	2	0.286521	0.532495	0.74832	0.999913
C12orf60	22	12	29	20	30	26	35	28	15	19	49	18	0.764528	0.854093	0.113793	0.999913
C12orf61	5	3	3	2	5	27	4	8	5	10	2	2	0.377598	0.619433	0.254016	0.999913
C12orf63	0	4	86	27	0	1	0	8	0	8	0	7	0	0	0.703892	0.999913
C12orf65	301	154	190	185	268	198	193	181	239	179	302	262	0.77775	0.863972	0.894267	0.999913
C12orf66	74	41	65	39	73	54	53	59	58	70	58	63	0.751772	0.845403	0.59338	0.999913
C12orf68	0	0	0	0	0	0	0	1	0	2	0	0	0.488548	0.70448	0.772465	0.999913
C12orf69	0	0	0	0	0	0	0	1	0	0	0	0	0.690541	0.820465	0.45129	0.999913
C12orf70	1	2	2	0	3	3	0	2	3	4	2	11	0.35183	0.596209	0.331335	0.999913
C12orf71	3	1	4	4	1	3	1	3	2	2	2	4	0.281844	0.526983	0.886752	0.999913
C12orf73	89	85	81	48	84	115	78	103	87	88	137	128	0.0659319	0.209317	0.853935	0.999913
C12orf74	0	1	0	0	0	0	0	0	0	1	0	0	0.577244	0.761992	0.461794	0.999913
C12orf75	660	340	659	596	514	413	537	370	544	274	929	517	0.00035035	0.0029434	0.82643	0.999913
C12orf76	65	100	49	57	69	140	59	113	54	111	91	154	0.0201759	0.0862621	0.534816	0.999913
C12orf77	0	0	0	0	0	0	0	1	0	2	0	1	0.442598	0.669287	0.652019	0.999913
C13orf33	0	1	0	0	0	1	0	1	0	2	0	0	0.380826	0.622216	0.981649	0.999913
C13orf35	1	0	0	2	0	0	0	2	0	1	0	0	0.614098	0.777785	0.764512	0.999913
C14orf1	570	375	429	360	526	431	695	476	489	287	882	553	0.396051	0.635234	0.143303	0.999913
C14orf101	210	246	249	178	165	249	149	167	136	183	246	328	0.206555	0.444196	0.953431	0.999913
C14orf102	353	304	305	222	297	281	254	247	262	292	391	390	0.779973	0.865541	0.749837	0.999913
C14orf105	0	1	0	2	0	2	0	9	0	2	1	6	0.659807	0.808987	0.92859	0.999913
C14orf118	417	558	367	578	224	598	291	359	105	478	351	746	0.0445564	0.158662	0.353298	0.999913
C14orf119	508	688	797	856	506	842	479	697	482	618	828	1197	0.00192605	0.0127248	0.818871	0.999913
C14orf126	230	194	309	112	232	171	211	201	162	187	273	234	0.723201	0.833793	0.293563	0.999913
C14orf129	330	393	318	327	274	496	294	411	286	399	463	581	0.682023	0.820465	0.944556	0.999913
C14orf132	0	3	0	1	0	3	0	3	0	3	0	7	0.4861	0.702387	0.77399	0.999913
C14orf133	316	360	257	324	247	352	262	366	282	367	396	581	0.683695	0.820465	0.390403	0.999913
C14orf142	137	82	195	156	194	139	111	90	140	70	237	122	0.00487633	0.0275993	0.347551	0.999913
C14orf149	49	63	82	83	57	73	63	29	42	47	78	63	0.00343941	0.0205248	0.444573	0.999913
C14orf159	322	317	170	163	225	260	284	258	249	237	416	378	0.00164543	0.011087	0.825733	0.999913
C14orf164	0	0	0	1	1	2	0	0	1	0	1	2	0.898617	0.942925	0.926384	0.999913
C14orf166	1783	1612	2140	1387	1820	1860	1638	1865	2058	1463	2747	2500	0.888882	0.937172	0.907926	0.999913
C14orf166B	0	2	0	0	0	2	0	0	0	0	0	1	0.407153	0.642621	0.732659	0.999913
C14orf169	247	163	434	244	266	227	226	199	262	183	303	214	0.000117365	0.00113239	0.31879	0.999913
C14orf176	4	2	1	12	1	16	3	8	0	15	0	13	0.77322	0.860759	0.41744	0.999913
C14orf177	0	0	0	1	0	0	0	0	0	2	0	1	0.742752	0.839191	0.229859	0.999913
C14orf178	0	0	0	0	0	0	0	0	0	1	0	4	0.438936	0.666662	0.159686	0.999913
C14orf180	0	0	0	0	0	0	0	0	0	2	0	0	0.584636	0.762741	0.298183	0.999913
C14orf182	1	7	6	1	3	7	1	5	3	5	4	10	0.957874	0.976928	0.754086	0.999913
C14orf183	9	16	5	6	11	12	2	9	7	13	8	17	0.292742	0.539349	0.797052	0.999913
C14orf2	1165	1105	1655	1252	1182	1010	1001	1055	1204	908	1965	1696	0.00541254	0.0300392	0.309222	0.999913
C14orf28	24	48	22	23	13	72	9	43	13	61	13	90	0.508627	0.71778	0.727875	0.999913
C14orf37	203	169	5	6	93	151	92	84	76	132	191	194	1.11022e-16	6.05711e-15	0.321471	0.999913
C14orf38	1	1	0	0	0	1	0	1	0	2	0	0	0.291482	0.53824	0.981649	0.999913
C14orf39	0	2	0	0	0	1	0	1	0	0	0	1	0.400632	0.638373	0.70861	0.999913
C14orf43	1199	918	707	792	792	718	735	649	620	784	1195	1219	0.943268	0.968718	0.438597	0.999913
C14orf45	28	16	31	24	20	23	22	19	31	23	40	35	0.438575	0.666662	0.323056	0.999913
C14orf79	129	148	117	161	75	141	90	170	85	154	114	242	0.197037	0.431563	0.818679	0.999913
C14orf80	205	75	134	128	172	216	187	137	244	105	229	140	0.678495	0.820465	0.314028	0.999913
C14orf93	100	85	148	104	96	108	105	127	114	121	113	142	0.126776	0.328367	0.801399	0.999913
C15orf23	1233	567	1025	884	1009	1061	919	729	999	606	1579	1053	0.188155	0.421021	0.439538	0.999913
C15orf26	0	5	1	1	0	0	0	0	0	2	1	2	0.647489	0.799492	0.0985117	0.999913
C15orf27	8	9	4	10	1	18	2	3	1	5	2	17	0.545842	0.739773	0.818511	0.999913
C15orf29	348	283	298	271	272	327	299	314	242	255	412	410	0.831633	0.901319	0.35436	0.999913
C15orf32	0	0	0	0	0	0	0	0	0	0	0	3	0.577218	0.761992	0.299136	0.999913
C15orf38	105	56	77	36	69	71	115	49	45	57	161	74	0.32564	0.572021	0.69003	0.999913
C15orf38-AP3S2	925	611	741	337	714	601	734	557	707	594	1161	896	0.0332098	0.126973	0.533718	0.999913
C15orf39	375	348	317	213	345	424	368	405	471	361	492	568	0.00886985	0.044908	0.734516	0.999913
C15orf40	175	147	226	175	166	197	145	165	147	165	215	280	0.0818593	0.244208	0.96592	0.999913
C15orf41	180	126	257	83	171	97	154	87	146	91	192	138	0.109039	0.29657	0.703366	0.999913
C15orf43	0	0	0	0	0	2	0	2	0	2	0	0	0.33876	0.58507	0.704648	0.999913
C15orf44	965	635	1217	842	1001	732	781	666	927	583	1306	960	0.00404023	0.0235101	0.84478	0.999913
C15orf48	0	2	1	0	0	1	0	1	0	1	1	1	0.847742	0.911699	0.714009	0.999913
C15orf52	6	9	31	176	4	9	2	8	4	11	2	15	0	0	0.811579	0.999913
C15orf53	0	0	0	0	0	1	0	0	0	0	0	1	0.617881	0.777871	0.941844	0.999913
C15orf54	0	1	0	0	0	3	0	1	0	1	0	1	0.318671	0.564533	0.668018	0.999913
C15orf55	10	6	5	4	3	18	3	10	10	14	18	38	0.13308	0.339373	0.0314258	0.999913
C15orf56	3	5	4	1	4	6	4	3	2	6	3	6	0.571295	0.758968	0.720643	0.999913
C15orf57	368	469	252	286	386	499	310	413	305	387	458	605	0.0161606	0.072449	0.399699	0.999913
C15orf59	0	0	0	0	0	0	0	1	0	1	0	0	0.572092	0.758968	0.996935	0.999913
C15orf60	1	5	0	1	1	1	1	1	0	2	0	1	0.501516	0.713496	0.566196	0.999913
C15orf61	170	98	103	57	166	151	120	100	136	81	205	134	0.00829841	0.042517	0.231522	0.999913
C15orf62	4	5	3	6	5	6	3	6	3	5	7	9	0.973107	0.984921	0.975902	0.999913
C15orf63	774	642	736	227	862	725	622	606	894	621	1051	775	0.000805368	0.00607706	0.98	0.999913
C16orf11	0	0	0	0	0	1	0	0	0	0	0	0	0.709053	0.823068	0.482786	0.999913
C16orf13	462	324	380	123	475	338	383	322	557	297	685	430	0.000215499	0.00192644	0.55636	0.999913
C16orf3	4	11	1	1	3	4	2	5	0	2	1	7	0.19026	0.423889	0.286581	0.999913
C16orf45	0	11	6	5	3	11	0	2	2	9	1	7	0.237819	0.481738	0.943517	0.999913
C16orf46	12	12	16	17	12	17	9	16	5	17	19	27	0.366335	0.609175	0.977339	0.999913
C16orf48	14	10	13	10	15	16	5	8	19	12	18	30	0.76187	0.852272	0.203266	0.999913
C16orf5	20	15	16	20	24	18	20	24	18	25	25	30	0.822192	0.894781	0.851047	0.999913
C16orf52	191	248	295	282	186	265	138	199	112	226	240	296	0.0002341	0.00206706	0.49965	0.999913
C16orf53	846	228	708	384	850	388	720	263	802	184	1036	312	0.0465241	0.163662	0.0408809	0.999913
C16orf54	0	2	0	0	0	1	0	3	0	1	0	6	0.188906	0.422126	0.837743	0.999913
C16orf55	76	59	111	104	80	84	67	84	99	62	103	88	0.00877165	0.0444358	0.705157	0.999913
C16orf57	1526	1442	1428	1552	1555	1786	1274	1534	1537	1233	2065	2185	0.580107	0.762741	0.630319	0.999913
C16orf58	555	648	545	279	562	606	529	599	679	653	716	801	0.00590035	0.0323674	0.616383	0.999913
C16orf59	306	109	207	118	290	246	217	181	328	136	335	170	0.229485	0.472917	0.300238	0.999913
C16orf62	58	21	44	7	36	38	39	25	27	30	80	48	0.0683681	0.21448	0.720815	0.999913
C16orf7	72	125	112	56	36	90	59	112	77	101	105	174	0.734489	0.838751	0.0793442	0.999913
C16orf70	583	585	417	337	492	581	444	523	460	560	719	964	0.0112041	0.0540653	0.420229	0.999913
C16orf71	3	18	4	7	6	21	2	20	5	17	8	30	0.198275	0.432892	0.823563	0.999913
C16orf72	952	969	1015	767	694	992	583	752	566	858	997	1354	0.141282	0.35206	0.763854	0.999913
C16orf73	0	0	1	1	0	5	0	0	0	5	1	3	0.763348	0.853304	0.478388	0.999913
C16orf74	41	51	121	45	35	42	52	48	52	36	49	52	0.000453919	0.00369288	0.604114	0.999913
C16orf78	0	0	0	0	0	1	0	1	0	0	0	0	0.585358	0.762741	0.303364	0.999913
C16orf79	6	16	13	15	15	11	18	17	10	10	49	34	0.825434	0.897085	0.538254	0.999913
C16orf80	744	551	649	572	713	859	632	627	702	516	1085	946	0.682477	0.820465	0.594181	0.999913
C16orf82	0	0	0	0	0	2	0	0	0	0	0	0	0.597803	0.771159	0.321094	0.999913
C16orf86	4	2	3	4	5	6	1	4	8	9	2	13	0.630804	0.788024	0.285074	0.999913
C16orf87	189	175	124	145	140	203	138	199	140	152	228	306	0.207885	0.445992	0.982051	0.999913
C16orf88	520	263	317	190	458	258	383	250	344	205	552	353	0.101107	0.281393	0.312753	0.999913
C16orf89	0	3	1	1	1	2	0	0	0	3	0	3	0.734016	0.838751	0.949756	0.999913
C16orf90	0	2	0	5	0	0	0	0	1	0	0	0	0.121858	0.319768	0.461501	0.999913
C16orf91	196	185	230	182	211	256	153	195	253	186	226	251	0.570117	0.758968	0.887238	0.999913
C16orf92	0	0	0	0	0	1	0	1	0	0	0	0	0.585358	0.762741	0.303364	0.999913
C16orf93	39	15	36	64	19	23	52	50	48	35	58	46	0.123947	0.323131	0.830348	0.999913
C16orf95	18	12	14	10	22	16	9	20	26	22	24	22	0.272116	0.517946	0.499308	0.999913
C16orf96	0	1	0	0	0	6	0	2	0	2	0	3	0.163379	0.385285	0.634699	0.999913
C17orf100	15	8	28	34	4	12	5	11	1	10	4	9	7.21191e-07	1.18254e-05	0.282031	0.999913
C17orf101	210	140	163	126	257	184	162	131	257	125	248	186	0.469083	0.687621	0.752384	0.999913
C17orf102	0	0	0	0	0	0	0	0	0	1	0	0	0.688371	0.820465	0.461794	0.999913
C17orf103	321	835	69	232	197	1004	214	929	209	716	323	1283	0	0	0.619249	0.999913
C17orf104	26	29	43	19	21	65	18	40	17	41	26	61	0.599786	0.771402	0.516818	0.999913
C17orf105	0	0	0	1	0	0	0	2	0	0	0	1	0.740689	0.838807	0.685402	0.999913
C17orf107	8	9	2	2	3	11	10	15	4	7	11	1	0.0494195	0.170679	0.132093	0.999913
C17orf108	12	49	14	7	10	44	16	36	23	58	12	55	0.0118427	0.0563467	0.4387	0.999913
C17orf109	0	4	0	0	1	3	0	3	0	0	2	4	0.0882888	0.257084	0.784816	0.999913
C17orf110	0	1	0	0	0	3	0	0	0	1	2	2	0.216183	0.456452	0.59669	0.999913
C17orf28	611	754	445	523	426	614	524	769	620	792	784	1090	0.0735901	0.226249	0.169711	0.999913
C17orf47	1	1	1	0	1	2	1	3	0	2	2	1	0.514498	0.72097	0.631797	0.999913
C17orf49	358	181	266	108	293	242	270	199	400	237	448	317	0.00796552	0.041045	0.18314	0.999913
C17orf50	1	2	3	1	0	2	0	0	0	0	0	1	0.170423	0.395338	0.732659	0.999913
C17orf51	1050	730	836	546	887	926	734	764	722	780	1212	1267	0.181003	0.41123	0.955401	0.999913
C17orf53	231	146	217	198	205	300	186	275	207	221	258	402	0.890311	0.938145	0.638889	0.999913
C17orf58	361	184	220	129	350	282	277	244	267	256	483	316	0.00131333	0.00921842	0.671214	0.999913
C17orf59	118	118	98	77	90	181	99	131	112	102	103	204	0.162677	0.384558	0.403309	0.999913
C17orf61	247	142	269	143	166	170	173	127	179	127	250	167	0.0585988	0.192802	0.668474	0.999913
C17orf62	408	515	387	345	260	575	326	572	355	462	489	744	0.453683	0.676704	0.857645	0.999913
C17orf64	0	0	0	0	0	0	0	0	0	2	0	2	0.462004	0.682188	0.179655	0.999913
C17orf66	1	2	0	3	0	6	1	4	0	9	0	13	0.456464	0.678291	0.690072	0.999913
C17orf67	43	57	94	64	37	50	34	52	33	63	59	92	0.00144278	0.00996755	0.41798	0.999913
C17orf70	442	557	402	221	416	599	378	531	462	439	506	825	0.00262564	0.0164711	0.838889	0.999913
C17orf72	0	1	7	6	0	0	0	1	0	1	0	1	0.000172337	0.00158871	0.834948	0.999913
C17orf74	3	3	2	2	0	3	1	3	4	3	13	10	0.432498	0.66146	0.0439461	0.999913
C17orf75	215	130	222	73	194	140	170	136	199	126	303	218	0.223004	0.464856	0.530408	0.999913
C17orf77	0	0	0	0	0	1	0	1	0	0	0	0	0.585358	0.762741	0.303364	0.999913
C17orf78	0	2	0	0	0	2	0	3	0	1	1	2	0.182205	0.412944	0.997345	0.999913
C17orf79	762	514	949	634	957	847	703	576	828	492	1236	880	0.249587	0.494614	0.370217	0.999913
C17orf80	561	551	514	535	433	735	387	568	334	518	603	850	0.416016	0.649944	0.34362	0.999913
C17orf81	471	359	639	445	433	557	419	487	498	374	727	636	0.0766779	0.232919	0.842015	0.999913
C17orf82	6	6	6	2	1	30	3	5	6	11	4	14	0.645207	0.797806	0.89692	0.999913
C17orf85	1186	843	543	369	858	954	885	843	623	794	1226	1315	5.64582e-07	9.49088e-06	0.371341	0.999913
C17orf89	305	311	320	228	369	318	216	274	390	295	462	406	0.566176	0.755965	0.460856	0.999913
C17orf96	631	376	536	445	629	499	622	519	564	260	735	518	0.634208	0.790336	0.00482323	0.904388
C17orf97	65	64	87	59	54	65	39	57	54	59	78	87	0.112726	0.302922	0.637985	0.999913
C17orf98	0	2	0	0	0	0	1	1	1	1	1	0	0.223828	0.465872	0.870849	0.999913
C17orf99	0	0	0	0	0	1	0	0	0	0	0	0	0.709053	0.823068	0.482786	0.999913
C18orf1	56	16	5	1	22	13	22	10	13	10	76	18	0.00234592	0.0149986	0.671674	0.999913
C18orf21	247	230	212	131	220	317	156	245	182	255	264	354	0.0882689	0.257084	0.693358	0.999913
C18orf25	638	544	638	669	458	671	399	484	325	591	694	875	0.0109589	0.0530685	0.909938	0.999913
C18orf26	0	2	0	0	0	1	0	0	0	1	0	2	0.365719	0.608893	0.677078	0.999913
C18orf32	25	89	17	30	22	70	23	74	39	62	34	137	0.00380062	0.022296	0.275387	0.999913
C18orf34	0	2	0	0	0	2	0	3	0	2	0	5	0.166469	0.389698	0.91774	0.999913
C18orf42	0	3	0	1	0	0	0	1	0	1	0	2	0.976013	0.986474	0.704266	0.999913
C18orf54	385	224	461	584	217	568	210	344	156	328	382	461	0.000490351	0.00394825	0.29613	0.999913
C18orf56	13	39	14	27	23	120	11	55	13	32	31	73	0.413815	0.647691	0.299281	0.999913
C18orf62	0	0	0	1	0	2	0	1	0	0	0	0	0.746593	0.841965	0.213051	0.999913
C18orf63	0	1	0	3	0	3	0	4	0	2	0	3	0.741786	0.838889	0.696481	0.999913
C18orf8	714	675	439	438	472	768	558	658	468	571	897	998	0.0167016	0.0744294	0.890313	0.999913
C19orf10	1127	745	1193	738	1116	870	1006	956	1384	891	1705	1176	0.880272	0.932041	0.416835	0.999913
C19orf12	245	294	222	179	175	227	176	229	166	254	290	382	0.698618	0.821084	0.383932	0.999913
C19orf18	0	0	0	0	0	1	0	1	0	1	0	0	0.49845	0.710891	0.788307	0.999913
C19orf21	10	5	1	1	2	1	1	3	5	4	8	5	0.108843	0.296192	0.159535	0.999913
C19orf24	247	265	271	229	346	307	224	226	393	188	477	386	0.759045	0.849972	0.639142	0.999913
C19orf25	261	248	223	215	217	371	210	366	263	280	332	485	0.167281	0.390574	0.992342	0.999913
C19orf26	115	96	85	47	83	111	68	115	93	86	125	150	0.0479857	0.167397	0.918153	0.999913
C19orf33	57	86	93	98	69	126	58	122	127	151	102	146	0.86033	0.919906	0.258006	0.999913
C19orf35	0	2	0	0	0	5	1	4	0	7	0	3	0.0621298	0.200392	0.723145	0.999913
C19orf38	1	6	3	7	0	3	0	8	3	7	0	5	0.226716	0.469226	0.469424	0.999913
C19orf40	47	37	48	38	28	126	45	78	47	56	62	98	0.527141	0.728294	0.401809	0.999913
C19orf42	598	384	500	259	510	452	405	281	523	311	730	493	0.356622	0.60152	0.78112	0.999913
C19orf43	1370	969	1257	1000	1435	1275	1097	965	1608	814	2031	1484	0.967764	0.982395	0.872264	0.999913
C19orf44	128	123	150	68	103	119	113	90	107	87	175	163	0.914542	0.952289	0.84201	0.999913
C19orf45	2	5	13	10	3	8	3	7	3	6	4	4	0.0137962	0.0637871	0.591259	0.999913
C19orf47	279	207	171	218	235	226	222	235	256	182	325	324	0.491677	0.707042	0.884913	0.999913
C19orf48	2075	1039	1614	884	2146	2142	1838	1472	2460	1195	2783	1806	0.0593576	0.194575	0.33797	0.999913
C19orf52	211	207	149	101	186	249	181	179	172	156	279	275	0.00641242	0.034483	0.505028	0.999913
C19orf53	869	607	963	547	820	733	590	575	989	593	1280	917	0.687138	0.820465	0.181666	0.999913
C19orf54	90	124	133	142	40	180	55	160	62	148	77	256	0.00625175	0.0337703	0.57857	0.999913
C19orf55	160	190	179	222	89	234	120	231	115	227	152	306	0.0496649	0.171013	0.910244	0.999913
C19orf57	36	23	134	284	30	45	39	33	50	37	74	49	0	0	0.406706	0.999913
C19orf59	2	134	0	5	2	142	1	208	7	297	3	349	0.000103586	0.00101632	0.0678708	0.999913
C19orf6	1393	1542	1059	1039	1138	1482	1182	1572	1421	1331	1771	2157	0.0495513	0.170889	0.642317	0.999913
C19orf60	121	87	104	43	102	88	119	99	138	86	209	140	0.0150972	0.0686811	0.357148	0.999913
C19orf66	149	283	135	286	81	221	140	323	111	220	144	366	0.269398	0.515602	0.695962	0.999913
C19orf67	2	5	0	1	0	13	0	4	0	4	1	7	0.117837	0.312588	0.746067	0.999913
C19orf68	60	41	55	27	41	42	40	58	38	42	63	71	0.673713	0.819286	0.890135	0.999913
C19orf69	0	0	0	0	0	1	0	1	0	1	0	0	0.49845	0.710891	0.788307	0.999913
C19orf70	219	175	236	117	238	211	215	190	347	179	306	226	0.335912	0.582076	0.816888	0.999913
C19orf71	0	1	0	1	6	4	4	4	5	6	4	8	0.0384428	0.141742	0.886829	0.999913
C19orf73	3	0	5	0	1	0	4	1	2	0	3	1	0.754868	0.847244	0.820296	0.999913
C19orf76	39	14	38	12	62	15	63	18	92	16	134	33	0.242648	0.487245	0.109062	0.999913
C19orf77	0	1	0	1	0	3	0	3	0	1	0	2	0.808351	0.885953	0.560186	0.999913
C19orf80	0	0	0	0	0	0	0	1	0	1	0	0	0.572092	0.758968	0.996935	0.999913
C19orf81	7	13	15	2	12	26	15	14	17	12	10	26	0.196763	0.431255	0.548951	0.999913
C1D	308	270	410	212	308	248	255	283	284	226	429	370	0.304367	0.551613	0.904517	0.999913
C1GALT1	446	460	615	500	369	345	428	338	327	418	529	716	0.00123161	0.0087349	0.396369	0.999913
C1GALT1C1	294	190	376	176	320	165	323	185	303	162	477	268	0.331571	0.577388	0.966637	0.999913
C1orf100	0	0	1	0	2	1	1	0	2	0	0	1	0.746717	0.841965	0.788493	0.999913
C1orf101	0	4	0	4	0	7	1	10	2	4	0	7	0.584401	0.762741	0.651307	0.999913
C1orf105	0	1	0	0	0	1	0	1	0	0	0	4	0.346887	0.59237	0.842312	0.999913
C1orf106	17	5	51	62	0	2	0	0	0	0	34	8	2.36133e-12	8.9502e-11	0.187273	0.999913
C1orf109	676	609	558	366	646	738	591	718	493	581	799	942	0.024825	0.10151	0.162304	0.999913
C1orf110	0	1	123	317	0	2	0	0	0	4	0	1	0	0	0.562224	0.999913
C1orf111	4	3	1	1	0	2	1	4	0	3	4	12	0.324174	0.570353	0.297432	0.999913
C1orf112	396	192	407	420	231	276	342	265	259	207	433	312	1.781e-05	0.000213057	0.360175	0.999913
C1orf114	0	1	1	1	0	3	0	1	0	2	1	4	0.698116	0.821084	0.582991	0.999913
C1orf115	234	174	208	318	177	201	162	220	168	150	249	276	0.00128122	0.00904716	0.500341	0.999913
C1orf116	0	2	0	0	0	0	0	1	0	1	1	4	0.237879	0.481807	0.307448	0.999913
C1orf122	114	127	88	139	120	202	106	142	180	132	176	212	0.403786	0.640508	0.658401	0.999913
C1orf123	172	105	179	73	199	138	165	88	221	90	357	200	0.19786	0.432367	0.213118	0.999913
C1orf127	0	3	0	0	0	1	0	3	0	7	1	4	0.084114	0.248445	0.270452	0.999913
C1orf129	0	4	0	2	0	2	0	1	0	2	0	2	0.906523	0.947631	0.906521	0.999913
C1orf130	0	3	0	0	0	3	0	4	0	3	0	4	0.120817	0.318176	0.900034	0.999913
C1orf131	224	129	172	122	193	133	155	135	175	140	225	200	0.841685	0.907788	0.920478	0.999913
C1orf135	428	121	244	235	297	211	287	188	305	149	418	213	0.275893	0.520997	0.349613	0.999913
C1orf141	0	0	0	1	0	1	0	1	0	2	0	0	0.844917	0.910216	0.981649	0.999913
C1orf144	1748	1590	2222	1660	1699	1672	1505	1559	1705	1528	2515	2391	0.059849	0.195469	0.608257	0.999913
C1orf146	0	0	0	0	0	3	0	1	1	0	0	1	0.302315	0.549841	0.846815	0.999913
C1orf150	0	4	0	2	0	3	0	2	0	0	0	2	0.89986	0.943754	0.495582	0.999913
C1orf151-NBL1	147	102	272	206	68	93	92	190	93	58	136	74	0.000183613	0.00167635	0.223585	0.999913
C1orf158	0	3	0	0	0	2	0	0	0	0	0	0	0.396239	0.635247	0.321094	0.999913
C1orf159	194	76	155	95	182	106	168	131	189	93	231	129	0.736122	0.838751	0.412897	0.999913
C1orf162	6	2	4	4	4	7	0	2	5	4	3	6	0.786368	0.870016	0.699027	0.999913
C1orf167	0	0	0	0	0	3	0	0	0	1	0	1	0.407082	0.642621	0.818374	0.999913
C1orf168	0	5	0	0	0	2	0	5	0	3	0	7	0.0810124	0.242141	0.892975	0.999913
C1orf172	1	2	0	1	0	3	0	3	0	3	0	6	0.446679	0.672266	0.841057	0.999913
C1orf173	1	0	0	4	0	4	0	4	0	6	0	5	0.887158	0.935919	0.825016	0.999913
C1orf174	442	241	537	278	408	348	371	275	401	236	602	369	0.10321	0.285198	0.547147	0.999913
C1orf177	0	0	0	0	0	1	0	1	0	0	0	2	0.4722	0.689839	0.894743	0.999913
C1orf182	6	1	4	10	4	4	1	4	2	1	3	8	0.110557	0.299273	0.804095	0.999913
C1orf186	1	1	0	1	1	1	0	4	0	5	1	3	0.383452	0.624007	0.855846	0.999913
C1orf187	1	5	0	0	1	5	0	3	0	0	0	4	0.0781261	0.236043	0.25446	0.999913
C1orf189	0	0	2	1	0	1	0	4	1	5	2	5	0.761423	0.851946	0.239279	0.999913
C1orf192	63	49	54	45	41	37	43	25	22	40	63	51	0.193159	0.42749	0.983999	0.999913
C1orf194	2	1	1	2	0	0	1	2	1	1	1	4	0.764035	0.853808	0.609244	0.999913
C1orf198	662	651	506	509	599	805	499	673	508	691	772	1084	0.148786	0.363369	0.891003	0.999913
C1orf201	185	133	184	123	167	118	179	128	177	141	244	174	0.750214	0.844495	0.723349	0.999913
C1orf204	4	2	0	0	1	3	4	2	3	4	4	2	0.0149904	0.0683087	0.865918	0.999913
C1orf21	284	141	259	123	203	130	226	108	206	100	411	183	0.524076	0.726868	0.603036	0.999913
C1orf210	0	1	0	0	0	3	0	3	0	0	0	0	0.307738	0.554606	0.0750393	0.999913
C1orf212	463	591	468	480	428	642	386	566	408	491	643	901	0.979015	0.987946	0.970119	0.999913
C1orf216	530	574	446	360	592	674	445	628	506	527	775	847	0.0191866	0.0831973	0.611507	0.999913
C1orf222	0	4	0	0	0	5	0	3	0	3	0	4	0.102114	0.283363	0.821649	0.999913
C1orf226	214	153	18	45	209	164	155	157	209	134	252	199	0	0	0.795966	0.999913
C1orf227	1	2	1	0	1	1	0	2	0	0	0	1	0.915207	0.952836	0.279792	0.999913
C1orf228	0	5	0	3	1	12	1	9	2	13	1	16	0.114716	0.306386	0.69843	0.999913
C1orf229	6	7	2	3	6	10	6	4	5	5	11	16	0.104445	0.287526	0.760603	0.999913
C1orf233	0	0	0	0	0	0	0	0	0	0	0	1	0.740582	0.838751	0.54867	0.999913
C1orf27	336	398	394	399	325	470	215	308	261	374	448	608	0.0812925	0.242718	0.553848	0.999913
C1orf31	349	236	328	200	316	339	260	237	374	182	504	361	0.621632	0.780734	0.996803	0.999913
C1orf35	253	149	182	124	244	225	208	177	222	153	313	275	0.0748599	0.228804	0.5763	0.999913
C1orf43	2848	2160	2010	1271	2702	2672	2516	2092	2412	1969	3731	3193	0.0014649	0.0100818	0.515916	0.999913
C1orf50	70	85	69	94	59	132	51	102	74	106	96	180	0.968975	0.982896	0.393863	0.999913
C1orf51	6	14	29	17	11	58	1	14	2	7	3	23	0.0942324	0.268273	0.172616	0.999913
C1orf52	592	424	1149	1072	562	505	467	479	565	432	689	620	3.33067e-16	1.76369e-14	0.732039	0.999913
C1orf53	5	7	7	4	4	6	4	12	13	14	9	10	0.518645	0.724357	0.2411	0.999913
C1orf54	2	4	2	5	1	7	1	4	1	9	2	13	0.905603	0.947245	0.477633	0.999913
C1orf56	40	49	47	17	37	69	39	75	53	63	55	80	0.046805	0.164393	0.994301	0.999913
C1orf61	0	1	0	0	0	1	0	0	0	0	0	1	0.527749	0.728294	0.941844	0.999913
C1orf63	194	395	186	320	184	681	154	458	199	394	280	638	0.358833	0.603255	0.577845	0.999913
C1orf64	0	0	0	0	0	0	0	1	0	2	0	0	0.488548	0.70448	0.772465	0.999913
C1orf68	0	0	0	0	0	0	0	0	0	3	0	2	0.42288	0.654758	0.126121	0.999913
C1orf74	40	48	68	57	36	52	31	40	33	61	50	74	0.0208522	0.0883766	0.499695	0.999913
C1orf85	398	632	345	302	383	832	315	508	404	561	399	710	0.0396341	0.144947	0.522911	0.999913
C1orf86	372	415	312	181	316	374	320	411	388	348	527	583	0.0028754	0.0177351	0.472212	0.999913
C1orf87	0	4	0	0	0	4	0	2	0	3	0	1	0.151804	0.368056	0.758853	0.999913
C1orf88	0	2	0	1	0	1	0	3	0	4	0	3	0.66249	0.810951	0.734969	0.999913
C1orf94	0	1	0	0	0	2	0	3	0	4	0	1	0.198996	0.433972	0.98464	0.999913
C1orf95	0	2	0	0	0	7	0	2	0	4	0	1	0.126993	0.328644	0.622115	0.999913
C1QA	0	0	0	0	0	0	0	0	0	0	0	1	0.740582	0.838751	0.54867	0.999913
C1QB	0	0	0	0	0	2	0	1	0	0	0	1	0.459877	0.680516	0.560108	0.999913
C1QBP	5383	2790	5010	2464	5635	2712	4467	2385	5645	2076	8046	3642	0.879692	0.931701	0.804705	0.999913
C1QC	0	0	0	0	0	0	0	1	0	0	0	0	0.690541	0.820465	0.45129	0.999913
C1QL1	0	0	0	0	0	0	0	0	0	0	0	1	0.740582	0.838751	0.54867	0.999913
C1QL3	45	15	41	18	31	20	48	18	27	18	37	22	0.591713	0.766693	0.270724	0.999913
C1QL4	0	0	0	0	1	0	0	1	1	0	0	1	0.358924	0.603255	0.91649	0.999913
C1QTNF1	92	104	104	55	89	84	78	79	107	119	116	100	0.518903	0.724436	0.421068	0.999913
C1QTNF2	8	10	39	48	0	16	2	17	5	12	8	14	6.14611e-11	1.98662e-09	0.562168	0.999913
C1QTNF3	3	7	1	0	8	5	3	6	9	8	4	7	0.00620435	0.033601	0.802275	0.999913
C1QTNF4	1	2	0	0	1	5	2	1	2	2	2	2	0.0454919	0.161006	0.794039	0.999913
C1QTNF5	0	0	0	0	0	0	0	4	1	0	0	0	0.397683	0.636038	0.676453	0.999913
C1QTNF6	4	17	2	5	0	10	3	20	1	11	3	17	0.291082	0.537667	0.732012	0.999913
C1QTNF7	0	1	0	0	0	2	0	2	0	2	0	2	0.257412	0.502234	0.941245	0.999913
C1QTNF8	0	1	2	3	3	3	0	2	1	2	1	2	0.440721	0.66802	0.624795	0.999913
C1QTNF9	0	4	0	1	0	1	0	8	1	3	0	7	0.296034	0.543191	0.790065	0.999913
C1QTNF9B	1	3	0	7	1	4	0	3	0	2	0	5	0.439243	0.667014	0.554704	0.999913
C1QTNF9B-AS1	7	6	28	23	5	8	9	9	13	12	13	11	0.00034537	0.00291176	0.430084	0.999913
C1R (NC_000012 7187012..7189912)	12	4	3	1	3	8	2	2	16	25	25	16	0.0907562	0.262447	0.000113927	0.0782196
C1R (NC_000012 7240704..7245543)	8	5	0	0	2	9	5	6	10	20	17	27	0.000198169	0.0017938	0.00629954	0.999913
C1RL	151	211	116	157	99	244	130	269	108	222	143	347	0.249701	0.494646	0.515838	0.999913
C1S	7	13	7	13	6	20	8	13	11	18	23	35	0.476859	0.694497	0.150774	0.999913
C2	4	25	3	7	4	28	5	17	6	22	9	44	0.0355169	0.133636	0.456092	0.999913
C20orf111	560	647	739	887	542	959	398	686	658	739	844	1154	0.0156216	0.0704712	0.207095	0.999913
C20orf112	334	384	126	137	148	367	156	346	143	312	277	548	7.66335e-06	0.000100124	0.671455	0.999913
C20orf118	17	21	24	21	24	26	21	18	17	13	25	25	0.456548	0.67836	0.283966	0.999913
C20orf132	5	4	0	3	1	7	2	9	4	17	2	13	0.0721695	0.223063	0.291622	0.999913
C20orf141	0	0	0	0	0	1	0	0	0	1	0	1	0.522103	0.725843	0.805393	0.999913
C20orf144	1	2	1	0	0	3	0	0	0	1	0	2	0.923303	0.957058	0.951995	0.999913
C20orf151	0	0	0	0	0	2	0	0	0	0	0	1	0.533412	0.731811	0.732659	0.999913
C20orf152	3	9	3	1	2	8	0	2	3	7	2	7	0.545691	0.739749	0.502061	0.999913
C20orf160	1	1	0	2	1	4	0	5	0	4	2	3	0.516545	0.722853	0.894609	0.999913
C20orf173	0	0	1	0	0	0	0	0	0	1	0	1	0.407701	0.642642	0.342424	0.999913
C20orf194	0	10	0	2	0	16	0	11	0	7	0	13	0.116282	0.309603	0.4885	0.999913
C20orf195	0	2	0	0	0	1	0	0	0	0	0	2	0.417349	0.650953	0.872885	0.999913
C20orf196	19	21	26	14	18	18	7	19	12	14	21	27	0.385183	0.625662	0.972396	0.999913
C20orf197	0	2	0	0	0	2	0	0	0	0	0	0	0.447236	0.672515	0.321094	0.999913
C20orf20	771	463	1013	625	674	494	538	478	634	387	872	628	8.31084e-05	0.000832656	0.633708	0.999913
C20orf201	0	0	0	0	0	0	0	0	0	0	1	0	0.71761	0.829578	0.550554	0.999913
C20orf202	0	1	1	0	0	0	0	0	0	0	0	1	0.407411	0.642642	0.54867	0.999913
C20orf203	0	2	0	0	0	3	0	1	0	2	0	3	0.217465	0.457945	0.94368	0.999913
[truncated: 16,006 more rows]

## Sheet: TableS3-p53 Dependent
Supplementary Table S3:TP53 Dependent Genes
Gene	WT_C	WT_E	KO_C	KO_E	Pro1_C	Pro1_E	Pro2_C	Pro2_E	Arg1_C	Arg1_E	Arg2_C	Arg2_E	Pvalue	Bonferroni	BH
ABHD4	484	1261	151	226	360	1852	440	1336	431	1410	604	1963	0	0	0
ACOX2	0	1	175	75	1	7	1	0	0	5	1	4	0	0	0
ACSL5	2	19	91	398	2	36	2	5	2	25	4	44	0	0	0
ADAMTS6	18	10	67	110	2	11	12	15	5	14	5	15	0	0	0
ADTRP	1	3	2804	639	0	1	2	0	0	2	1	2	0	0	0
AFF3	0	10	326	197	0	14	0	15	0	7	0	23	0	0	0
AKAP12	263	1003	3944	2591	321	934	283	456	311	1110	595	1496	0	0	0
AMPD3	40	123	224	311	40	131	23	59	35	117	72	144	0	0	0
ANGPTL4	32	42	762	197	13	65	22	53	10	36	18	71	0	0	0
ANKRD5	0	3	28	62	1	2	1	4	0	6	3	6	0	0	0
ANLN	2008	928	3792	5044	1490	1931	1542	1543	1101	1321	2910	2554	0	0	0
ANTXR2	225	276	4614	1429	142	155	286	287	210	407	300	387	0	0	0
AOX1	1	6	225	342	0	13	1	5	0	12	0	17	0	0	0
AP1M2	160	330	18	62	162	386	127	257	186	238	291	409	0	0	0
APOBEC3B	460	704	1763	2965	359	1517	170	1128	392	1116	442	1323	0	0	0
ARFGAP3	498	586	1372	1316	346	521	332	592	339	596	494	808	0	0	0
ARHGAP22	157	151	1251	136	161	118	126	132	220	177	230	243	0	0	0
ARHGAP23	93	250	7	18	63	298	47	181	63	224	91	406	0	0	0
ARL9	0	3	61	41	0	11	0	6	0	0	0	5	0	0	0
ASAP2	530	335	1135	1163	330	250	357	194	252	270	662	461	0	0	0
AUTS2	0	9	378	201	0	4	0	7	0	4	0	8	0	0	0
B4GALT6	154	128	1970	802	110	172	133	109	88	115	247	293	0	0	0
BCL10	344	791	2088	2069	295	979	234	837	302	735	413	1250	0	0	0
BCL2A1	0	1	673	900	1	2	0	0	0	0	1	1	0	0	0
BCL9L	1015	2158	254	438	644	2159	764	1866	735	1606	1319	3220	0	0	0
BCOR	303	158	1013	758	187	196	235	159	145	151	421	430	0	0	0
BEST3	1	10	80	107	2	14	1	19	1	13	5	40	0	0	0
BHLHE40	337	1175	2409	2930	180	852	180	624	149	740	284	1639	0	0	0
BIRC3	58	307	166	2736	40	185	31	141	37	341	79	590	0	0	0
BMP8A	76	143	8	17	54	158	54	119	63	148	85	227	0	0	0
BRK1	643	563	1655	1594	657	666	439	490	606	447	1010	878	0	0	0
BTG2	597	2941	280	724	901	3457	568	3529	870	2960	903	4686	0	0	0
BTNL9	0	6	334	388	0	2	0	2	0	0	9	30	0	0	0
C12orf55	0	1	90	31	0	1	0	2	1	0	0	3	0	0	0
C12orf63	0	4	86	27	0	1	0	8	0	8	0	7	0	0	0
C15orf52	6	9	31	176	4	9	2	8	4	11	2	15	0	0	0
C17orf103	321	835	69	232	197	1004	214	929	209	716	323	1283	0	0	0
C19orf57	36	23	134	284	30	45	39	33	50	37	74	49	0	0	0
C1orf110	0	1	123	317	0	2	0	0	0	4	0	1	0	0	0
C1orf226	214	153	18	45	209	164	155	157	209	134	252	199	0	0	0
C22orf46	213	302	493	956	125	312	131	338	137	265	241	433	0	0	0
C2CD2	1123	760	13663	2335	798	613	708	615	686	698	1251	1100	0	0	0
C6orf141	0	1	171	120	0	1	0	1	0	0	0	1	0	0	0
CACNA2D1	0	5	794	244	0	0	1	2	0	9	0	6	0	0	0
CADPS2	286	182	60	15	192	168	247	125	201	151	354	194	0	0	0
CALB2	8	1	128	71	12	5	2	0	6	3	7	4	0	0	0
CAMK2N1	253	290	1433	542	173	385	154	314	187	251	308	429	0	0	0
CAPRIN2	580	740	2984	1685	465	913	463	646	348	671	689	1094	0	0	0
CARD6	6	23	189	294	1	8	12	71	5	68	7	42	0	0	0
CBLB	139	134	1294	365	77	182	90	110	71	149	106	196	0	0	0
CCDC120	144	331	0	5	100	375	123	389	120	252	155	496	0	0	0
CCDC15	38	37	104	179	18	72	20	58	17	61	42	63	0	0	0
CCDC19	10	7	93	68	9	11	4	8	4	14	12	11	0	0	0
CCNJL	32	26	154	119	15	28	16	15	15	7	11	10	0	0	0
CCRL2	1	17	31	84	0	11	0	8	2	24	0	32	0	0	0
CD44	3	6	2137	3524	0	9	0	6	0	4	0	9	0	0	0
CD68	230	1445	7079	4763	273	1256	79	1119	325	1442	311	2745	0	0	0
CDC42BPG	175	923	1	4	178	849	173	985	117	590	331	1909	0	0	0
CDC42EP3	233	349	52	83	225	466	229	404	170	432	296	555	0	0	0
CDC7	580	207	972	999	457	474	481	354	353	310	604	515	0	0	0
CDCP1	1181	1091	3658	3154	888	1185	761	899	810	978	1318	1515	0	0	0
CDK17	611	582	2371	510	398	446	467	493	275	458	591	799	0	0	0
CDS1	329	241	53	51	265	229	288	203	231	222	477	309	0	0	0
CENPH	584	98	618	677	347	225	463	219	395	146	762	268	0	0	0
CKMT1A	1	0	85	50	0	2	0	5	0	2	1	10	0	0	0
CKMT1B	0	4	223	162	0	3	0	0	0	5	3	12	0	0	0
CLEC11A	230	175	2090	1023	127	150	297	291	387	214	334	264	0	0	0
CNTD1	4	5	62	111	1	6	2	9	2	10	4	10	0	0	0
COL6A1	2226	3161	264	376	1562	3396	1354	3001	1913	2385	2202	3803	0	0	0
CORO1C	3848	5090	11326	9555	3051	3262	2536	3033	2898	3951	6313	7532	0	0	0
CORO2B	22	71	533	158	14	44	24	25	23	35	33	81	0	0	0
CPVL	1	5	322	157	0	3	0	0	0	2	25	30	0	0	0
CRMP1	1	5	368	160	0	7	0	6	0	5	0	12	0	0	0
CTTNBP2NL	542	1019	1349	1586	340	901	324	669	253	729	596	1307	0	0	0
CUBN	1	11	306	192	1	12	0	19	0	23	0	23	0	0	0
DCLK1	10254	4858	9	6	7074	2745	4908	2008	8194	3844	18287	8305	0	0	0
DDX60L	31	74	259	365	22	126	11	58	17	107	23	72	0	0	0
DGKI	0	12	442	319	0	18	0	5	0	9	1	31	0	0	0
DHRS3	135	106	1	2	105	168	181	176	184	219	244	212	0	0	0
DLC1	299	136	1902	525	177	219	152	83	228	211	266	194	0	0	0
DLGAP4	358	493	837	968	232	480	248	427	299	385	386	640	0	0	0
DSP	1322	1719	3	63	778	1736	901	1215	552	1387	1362	2183	0	0	0
DUSP23	0	0	124	56	0	0	0	0	0	0	0	0	0	0	0
DUSP6	470	628	2775	2140	506	760	520	727	383	595	520	762	0	0	0
DUT	971	116	1170	1003	957	271	872	190	973	140	1452	248	0	0	0
DYSF	52	103	2	3	36	107	39	80	33	91	33	92	0	0	0
E2F1	608	170	648	1019	409	352	405	306	393	159	849	325	0	0	0
ECM1	13	30	717	2204	12	70	6	38	13	49	14	92	0	0	0
EFNA2	83	46	0	0	70	69	72	64	66	51	74	87	0	0	0
EFNB2	137	104	2533	1047	79	184	117	170	94	167	200	197	0	0	0
EIF4A2	5967	6909	2428	962	6271	8584	5040	6101	5261	6191	7499	8333	0	0	0
ELF1	291	431	1107	705	129	346	179	258	209	467	244	434	0	0	0
ELK3	244	324	1333	430	184	252	198	234	148	367	344	511	0	0	0
ELL2	430	657	5341	3757	384	884	291	726	279	823	512	1126	0	0	0
ENTPD7	566	472	3003	1402	339	519	426	445	230	617	567	1073	0	0	0
EPCAM	2	1	285	234	0	3	0	1	0	0	41	26	0	0	0
EPPK1	126	524	2	2	55	679	109	458	83	558	81	482	0	0	0
EPS8L2	424	1489	33	119	313	1546	306	1741	410	1423	607	2200	0	0	0
ERCC1	501	599	4087	2741	542	635	467	929	496	611	671	908	0	0	0
ESCO2	376	243	955	1231	375	642	387	441	258	356	478	558	0	0	0
ETS1	158	641	3123	3361	100	307	46	246	70	499	265	1001	0	0	0
EVC	2	10	1450	634	0	3	0	4	0	10	1	14	0	0	0
FAM111A	179	667	755	1609	113	644	104	491	102	679	247	1020	0	0	0
FAM131B	120	90	331	308	46	89	70	82	40	75	85	89	0	0	0
FAM131C	75	68	5	4	73	65	79	95	91	66	96	97	0	0	0
FAM167A	79	68	0	3	43	92	39	78	58	70	68	100	0	0	0
FANCD2	1019	318	1356	1707	836	533	909	482	745	381	1211	571	0	0	0
FANCI	2143	626	3453	2578	1802	1189	1783	1022	1593	888	2473	1222	0	0	0
FCGRT	213	345	0	1	164	439	170	468	191	355	249	512	0	0	0
FGF1	1	7	20	260	0	10	0	7	0	2	0	9	0	0	0
FGF5	1	1	127	50	0	0	0	3	0	0	0	1	0	0	0
FHL2	681	1951	5726	1036	824	1494	432	1706	813	1343	1413	2687	0	0	0
FIGNL1	221	172	606	546	148	271	134	200	137	225	231	355	0	0	0
FLNB	3258	3154	5228	8791	2312	2206	2246	1912	2012	2305	3508	3515	0	0	0
FMNL3	658	673	1166	1339	455	740	451	518	378	489	814	834	0	0	0
FOXD1	180	305	1119	1165	141	244	167	266	161	229	330	708	0	0	0
FRMD6	387	676	2041	1077	519	858	291	396	294	656	629	1006	0	0	0
G0S2	76	87	3805	2471	70	43	23	13	38	22	95	91	0	0	0
G2E3	218	184	656	444	221	307	169	198	129	200	263	307	0	0	0
GABARAPL1	504	914	91	338	374	1214	446	784	426	910	702	1606	0	0	0
GALNT6	597	549	1979	1433	502	359	467	410	507	410	810	744	0	0	0
GCA	169	100	20	11	167	142	195	122	151	111	225	142	0	0	0
GDF15	453	5276	19	141	1786	4268	104	4787	495	4098	923	6933	0	0	0
GEM	45	56	935	490	35	82	32	38	20	56	73	127	0	0	0
GFPT2	40	13	5650	1932	2	7	6	3	4	2	145	41	0	0	0
GJC1	5	16	77	218	7	37	2	28	3	28	6	35	0	0	0
GLIPR1	255	171	1208	1272	249	220	211	176	185	183	332	387	0	0	0
GLRX	171	269	2999	890	171	252	194	161	232	254	407	697	0	0	0
GNA15	0	5	134	154	0	5	2	13	6	7	2	11	0	0	0
GRHL3	12	493	0	1	11	666	7	562	32	608	15	779	0	0	0
HAS2	0	2	189	77	0	2	0	5	0	0	1	6	0	0	0
HDAC9	2	80	820	1616	1	30	1	26	9	219	13	104	0	0	0
HGF	1	4	2427	820	0	1	0	1	0	0	0	2	0	0	0
HMGA1	4972	2485	20545	4919	4775	2648	4297	2499	5840	2110	6970	3838	0	0	0
HOXC13	91	94	0	0	120	118	86	66	86	56	109	64	0	0	0
HSPH1	530	734	2404	1392	520	833	435	630	510	651	782	898	0	0	0
HTRA1	0	0	38	46	0	1	0	1	0	1	0	2	0	0	0
HYDIN	0	24	102	98	0	27	0	21	0	26	0	41	0	0	0
ICAM2	0	0	143	280	0	1	0	0	1	4	0	4	0	0	0
IFI16	6	100	4176	3878	3	32	2	54	48	388	9	201	0	0	0
IKZF3	0	17	828	988	0	19	0	11	0	23	0	23	0	0	0
IL10RA	0	2	35	31	0	1	0	1	0	0	0	4	0	0	0
IL13RA2	2	1	494	219	0	2	1	5	13	20	4	22	0	0	0
INPP5B	897	968	273	200	842	1116	618	841	670	904	949	1369	0	0	0
IQCG	74	44	413	769	52	49	49	28	60	42	69	49	0	0	0
IRAK1	797	697	4704	2663	800	795	665	714	763	575	1026	1096	0	0	0
ISG20	44	80	163	372	20	68	14	116	43	129	56	184	0	0	0
ITGAX	2	18	79	242	2	11	0	6	1	12	0	12	0	0	0
ITGB1	8350	7843	35181	24744	6250	6143	3872	4285	4726	5224	9973	10749	0	0	0
ITPR3	3593	2518	9749	4750	2940	2265	2872	2230	2777	2237	4230	3172	0	0	0
JMJD1C	1032	1531	3351	2499	688	1154	753	1094	371	1346	962	1837	0	0	0
JUN	609	1044	6309	1942	300	925	214	769	373	972	624	1499	0	0	0
KCNN4	4	15	954	428	4	5	2	11	62	90	4	22	0	0	0
KLHL29	272	248	55	46	219	227	213	206	230	230	358	346	0	0	0
KLHL35	26	42	378	181	35	50	28	32	83	80	59	75	0	0	0
KRT80	958	698	5	1	1251	317	645	393	1128	450	1281	843	0	0	0
LAMA1	49	1209	2143	1884	81	1037	6	380	25	830	145	2175	0	0	0
LAMB3	38	344	9894	5417	12	113	8	74	93	702	87	1283	0	0	0
LGALS1	714	1892	3494	4615	478	1782	599	2067	653	1507	1017	3005	0	0	0
LGI2	176	68	17	11	145	71	124	85	99	51	199	104	0	0	0
LIF	260	899	1274	1178	266	1053	227	1120	374	1042	396	1517	0	0	0
LIMA1	327	767	999	1698	243	406	357	448	221	411	425	681	0	0	0
LMAN1	328	274	2204	1397	268	406	238	294	199	293	398	516	0	0	0
LRRC6	13	9	176	127	4	6	0	1	4	10	8	6	0	0	0
LRRC8C	463	452	1523	837	393	403	408	384	304	493	602	674	0	0	0
LRRCC1	224	136	519	324	146	194	148	165	121	138	253	190	0	0	0
LRRN4	6	5	30	93	0	7	2	6	4	6	4	13	0	0	0
LTBP2	27	206	2337	872	22	99	22	156	24	225	71	388	0	0	0
MANSC1	37	39	152	121	26	31	30	22	47	45	32	52	0	0	0
MAP1LC3C	1	2	1213	27	0	1	1	1	0	0	0	1	0	0	0
MAST4	104	520	4765	2385	65	472	124	527	63	660	97	774	0	0	0
MAVS	964	1090	2116	1882	597	1071	709	984	509	1036	997	1424	0	0	0
MCL1	4912	4966	16927	5856	4123	5748	3799	5146	3615	4800	5645	7399	0	0	0
MFGE8	661	1274	122	421	388	1439	444	1413	439	1110	795	2025	0	0	0
MICALL2	357	610	41	70	188	714	269	753	322	581	414	908	0	0	0
MLF1IP	507	236	866	941	407	562	365	410	340	325	561	491	0	0	0
MT1M	33	23	203	99	41	25	43	6	58	12	106	21	0	0	0
MT1X	278	111	987	278	287	166	241	84	346	102	438	150	0	0	0
MT2A	255	166	10477	2670	320	203	254	109	386	118	812	393	0	0	0
MYD88	267	311	697	761	232	323	264	329	269	319	285	415	0	0	0
MYL9	603	793	682	2396	411	809	338	593	503	510	839	1149	0	0	0
MYO5A	853	876	1990	1447	537	771	564	526	323	821	870	1128	0	0	0
MYO5C	1	5	185	217	0	9	0	12	1	9	1	13	0	0	0
NAA15	1816	818	3468	1564	1669	639	1455	602	1196	669	2291	971	0	0	0
NAGA	491	328	1418	1427	364	414	372	342	487	418	523	472	0	0	0
NAV1	343	389	17	34	196	355	233	288	212	339	318	504	0	0	0
NFKBIZ	95	633	773	1022	72	506	64	340	54	507	148	855	0	0	0
NKX3-1	116	276	1162	711	102	528	104	333	106	319	158	304	0	0	0
NOTUM	175	80	3	2	169	118	99	70	102	70	170	85	0	0	0
NPL	0	0	166	78	0	3	0	3	1	2	0	3	0	0	0
NPTXR	152	647	6	14	111	1021	86	748	162	734	196	749	0	0	0
NRP1	34	172	2260	2919	24	217	9	98	96	312	13	90	0	0	0
NRP2	369	359	66	24	441	395	348	286	278	349	480	452	0	0	0
NT5E	3	17	144	252	7	55	1	15	23	83	11	37	0	0	0
NTF4	43	150	0	0	27	123	33	173	17	174	44	197	0	0	0
NTN4	153	177	5	9	115	201	88	136	76	128	188	175	0	0	0
OPCML	1	15	3103	1850	1	11	0	20	3	52	1	71	0	0	0
PAPL	24	55	550	370	16	48	24	46	25	44	24	65	0	0	0
PAPSS2	2	13	59	157	0	15	1	30	1	14	2	34	0	0	0
PCED1A	204	308	505	1031	120	238	145	345	159	295	275	432	0	0	0
PCSK9	0	1	75	40	0	0	1	2	0	0	0	2	0	0	0
PER3	60	66	288	222	49	76	50	29	47	73	40	51	0	0	0
PHF20	458	392	1016	701	322	381	309	252	252	313	562	455	0	0	0
PICK1	303	301	13	48	273	267	272	357	335	266	483	502	0	0	0
PKM	10726	6465	29660	16273	9643	6677	8942	5322	10125	4510	15424	8464	0	0	0
PLAU	194	216	370	530	95	268	99	152	100	194	165	324	0	0	0
PLEKHA4	37	47	110	164	3	20	3	13	5	15	26	54	0	0	0
PLEKHG4	581	919	72	163	468	983	374	795	753	1047	790	1250	0	0	0
PLIN4	23	163	3	11	29	198	15	164	30	187	27	302	0	0	0
PLLP	68	87	1	2	52	123	39	77	59	98	73	140	0	0	0
PMEPA1	99	164	2	1	50	105	58	135	87	129	143	258	0	0	0
PNMA2	1	3	186	285	0	1	0	4	0	3	0	4	0	0	0
PPM1H	449	388	94	33	327	455	343	288	277	289	525	531	0	0	0
PPP1R3B	187	225	595	1290	153	321	125	201	92	194	198	386	0	0	0
PRAME	1012	979	1	1	917	1132	832	1103	915	791	1267	1372	0	0	0
PRDM16	483	335	112	53	334	248	308	228	301	238	507	425	0	0	0
PRDM8	27	63	1927	1304	22	47	19	45	29	67	24	90	0	0	0
PRKCA	722	388	26	15	352	335	375	264	334	353	668	468	0	0	0
PRODH	35	244	1	3	25	253	23	217	17	174	57	258	0	0	0
PRRT4	384	325	44	52	333	387	293	431	373	319	424	425	0	0	0
PTPRU	1071	1902	344	195	821	1697	663	1687	737	1545	1219	2660	0	0	0
PXN	1489	2133	6116	3577	1150	1854	894	1910	1174	1841	1599	3016	0	0	0
RAB17	166	348	0	1	195	356	215	377	225	289	305	569	0	0	0
RAC2	0	6	191	404	0	3	0	5	0	3	0	5	0	0	0
RAD9B	13	20	79	91	4	20	16	23	10	25	20	26	0	0	0
RANBP17	0	7	61	44	0	5	0	6	0	7	0	9	0	0	0
RASA1	655	556	2875	718	377	568	449	443	314	544	750	800	0	0	0
RECQL	470	542	2140	2426	379	846	398	561	325	577	711	960	0	0	0
REEP3	420	362	837	934	274	333	362	441	339	368	546	583	0	0	0
REPS2	69	166	5	15	43	185	49	154	49	160	69	200	0	0	0
RGMB	384	294	2922	1083	328	312	246	243	217	289	353	403	0	0	0
RGS4	13	8	5733	1435	6	3	2	5	11	21	33	32	0	0	0
RHOBTB3	4608	2047	49	128	3215	1761	2651	1229	2710	1535	4093	2053	0	0	0
RHOD	253	748	51	67	299	904	208	844	384	703	526	1151	0	0	0
RNF144B	75	109	1	4	34	128	51	110	31	90	55	142	0	0	0
ROBO4	1	0	79	368	0	1	0	3	2	1	0	2	0	0	0
S100A10	3	4	397	1025	2	3	0	3	0	3	4	1	0	0	0
S100A13	394	649	1717	1263	366	990	390	731	495	672	582	1115	0	0	0
S100A16	15	16	8848	3580	1	3	4	2	2	5	4	3	0	0	0
S100A2	19	28	11907	4699	14	32	7	22	29	30	32	35	0	0	0
S100A6	1365	2891	8495	5855	789	1723	941	2300	1700	2859	1749	3768	0	0	0
SCARF1	3	42	373	660	7	37	2	53	6	37	4	55	0	0	0
SCN1B	108	87	1	0	82	98	79	78	84	66	142	136	0	0	0
SDC3	508	786	47	103	298	836	330	697	415	714	470	851	0	0	0
SEC63	1228	845	283	196	1071	798	858	712	826	794	1560	1156	0	0	0
SELT	626	957	3397	1905	744	1027	642	988	595	961	1076	1564	0	0	0
SEMA3A	234	47	1636	295	326	44	240	30	227	82	249	72	0	0	0
SEMA7A	5	18	2445	466	9	56	7	29	2	16	11	38	0	0	0
SERPINB8	106	360	637	705	172	442	130	475	162	424	193	672	0	0	0
SERPINE1	151	2280	17161	5085	110	1434	126	1767	430	2807	725	4751	0	0	0
SESN1	440	1909	235	238	716	2674	482	2084	605	2242	643	2932	0	0	0
SGIP1	0	2	680	151	0	5	0	5	1	3	0	7	0	0	0
SH2B3	862	698	5721	1548	743	836	534	608	562	665	903	1132	0	0	0
SH2D3A	281	310	8	39	289	235	268	310	335	241	332	373	0	0	0
SH2D4A	190	171	652	500	229	194	187	158	210	170	230	220	0	0	0
SH3PXD2A	27	67	663	465	4	37	6	27	8	25	60	113	0	0	0
SH3TC1	0	4	40	113	0	7	0	2	1	1	1	1	0	0	0
SH3YL1	19	30	140	84	13	28	5	17	6	20	7	41	0	0	0
SHANK1	320	503	1871	572	183	392	236	446	240	449	242	513	0	0	0
SLC15A3	0	8	371	275	0	4	1	0	3	5	0	9	0	0	0
SLC19A3	0	2	76	41	0	5	0	0	0	4	0	2	0	0	0
SLC4A8	37	35	679	232	8	63	17	33	19	56	15	49	0	0	0
SMS	1777	861	2841	2110	1411	702	1359	949	1531	631	2430	1278	0	0	0
SMURF2	764	1088	11062	2770	544	635	542	590	451	685	1095	1481	0	0	0
SOX9	0	1	52	310	0	1	0	3	0	1	1	0	0	0	0
SPOCD1	3	10	517	612	1	11	0	11	3	16	3	39	0	0	0
SPRY4	1203	918	6068	2090	1074	1077	515	691	357	491	1220	1349	0	0	0
SRFBP1	286	242	2021	949	193	286	178	189	174	232	292	354	0	0	0
SRGAP3	11	159	0	1	10	185	8	136	3	148	11	155	0	0	0
SSC5D	2	6	31	68	0	1	0	5	0	2	0	3	0	0	0
ST3GAL5	200	123	10	10	110	113	110	126	114	88	199	201	0	0	0
STAP2	2	3	70	159	1	6	2	2	1	5	1	3	0	0	0
STC1	11	0	24191	4199	7	1	7	1	6	5	12	2	0	0	0
STK4	2047	1510	4018	3581	1612	1547	1610	1336	1018	1302	2189	2127	0	0	0
SUN3	1	1	115	127	1	12	0	0	1	4	1	3	0	0	0
SYT7	300	295	51	23	272	246	197	236	275	192	330	274	0	0	0
TES	0	3	204	587	1	4	4	5	2	9	1	4	0	0	0
TFPI	64	157	1553	936	2	15	106	191	117	227	70	152	0	0	0
TGFA	266	488	52	66	188	455	209	414	152	419	268	638	0	0	0
THNSL2	0	0	24	64	0	0	0	3	0	1	0	4	0	0	0
TIMP1	1020	1805	4689	4528	1060	2198	755	1532	1024	1268	1480	2841	0	0	0
TM4SF1	0	3	1279	748	0	1	0	4	0	1	0	2	0	0	0
TMEM156	0	1	178	77	1	3	0	0	0	0	0	4	0	0	0
TMEM185B	839	1094	2401	1818	756	987	619	926	762	999	1004	1371	0	0	0
TMEM194B	6	26	799	445	1	29	1	7	0	14	4	33	0	0	0
TMEM63C	135	247	13	17	98	186	115	154	139	194	163	278	0	0	0
TNFRSF11A	46	68	0	0	56	91	35	63	36	72	79	49	0	0	0
TOMM34	1277	1114	3954	2780	1522	1370	1164	1279	1453	914	2091	1940	0	0	0
TP53INP1	319	3258	103	453	175	4288	158	3148	108	2899	270	4917	0	0	0
TPX2	3683	1296	5880	5437	3612	2637	3094	2153	3142	1660	5026	2498	0	0	0
TRIB2	299	128	27	4	221	168	157	106	164	94	312	170	0	0	0
TSPAN13	221	164	19	52	165	196	149	221	180	167	283	336	0	0	0
TSPAN15	197	87	4	4	191	100	155	71	158	75	236	127	0	0	0
TTC39A	268	255	3	11	247	240	245	271	227	236	349	404	0	0	0
TTI1	851	430	1716	1554	783	603	711	559	615	488	921	721	0	0	0
UAP1	1407	1510	4715	7078	1524	1188	1125	1279	1321	1219	2206	2351	0	0	0
UBE2V1	1277	793	2537	2525	1031	787	1002	654	1246	511	2162	1303	0	0	0
UNC5B	334	502	101	30	272	638	183	483	208	433	283	708	0	0	0
UPP1	222	264	4398	1273	175	413	132	274	235	348	375	634	0	0	0
USH1G	39	72	0	1	23	92	24	59	21	48	35	98	0	0	0
VEPH1	13	9	353	153	4	11	1	1	2	5	15	16	0	0	0
VIM	9	11	494	753	4	19	11	16	11	24	3	15	0	0	0
VWA1	167	111	19	13	123	105	154	118	161	111	225	150	0	0	0
WDFY2	163	136	664	238	113	162	139	119	92	153	216	183	0	0	0
WDR76	852	121	862	687	582	258	571	198	476	144	1022	231	0	0	0
WNT11	135	278	11	18	117	288	76	239	97	203	156	328	0	0	0
WWTR1	368	245	773	711	297	284	343	266	202	204	481	400	0	0	0
XKR9	3	5	44	64	0	14	1	3	4	15	1	7	0	0	0
ZBTB38	764	1479	3047	3060	477	1481	624	970	405	1360	866	1975	0	0	0
ZEB1	197	368	4666	1584	157	527	96	330	87	434	170	496	0	0	0
ZFP36L1	495	1419	4575	2342	420	1062	294	1036	491	1398	732	2441	0	0	0
ZMYND8	360	469	1174	908	210	396	294	425	248	422	434	625	0	0	0
ZNF175	214	267	550	461	138	269	123	229	120	256	221	377	0	0	0
ZNF295	1023	785	2458	1185	659	924	585	670	378	828	900	1132	0	0	0
ZNF438	42	16	2742	625	14	21	25	12	19	15	23	25	0	0	0
ZNF474	0	1	137	50	0	6	0	1	3	3	0	2	0	0	0
ZNF704	831	327	43	10	512	278	574	205	381	287	731	391	0	0	0
ZYX	1998	2453	5152	4324	1665	2502	1297	2391	2115	1811	2505	3844	0	0	0
ADRA2C	188	153	17	18	146	145	80	150	128	108	171	158	1.11022e-16	1.99885e-12	6.05711e-15
APLN	183	136	74	13	196	224	181	165	200	167	272	221	1.11022e-16	1.99885e-12	6.05711e-15
ARHGEF17	622	895	167	235	377	1034	436	702	399	787	755	1372	1.11022e-16	1.99885e-12	6.05711e-15
ARL13B	190	84	389	299	167	118	152	106	97	101	233	163	1.11022e-16	1.99885e-12	6.05711e-15
C14orf37	203	169	5	6	93	151	92	84	76	132	191	194	1.11022e-16	1.99885e-12	6.05711e-15
CSNK2A1	2546	1482	4394	2695	1917	1186	1842	1265	1440	1133	2807	1906	1.11022e-16	1.99885e-12	6.05711e-15
FRMD4A	310	443	1226	441	322	359	254	378	243	434	359	625	1.11022e-16	1.99885e-12	6.05711e-15
NAB1	437	436	762	983	285	394	327	251	187	235	504	612	1.11022e-16	1.99885e-12	6.05711e-15
PPM1N	22	36	71	151	13	39	16	41	22	23	30	41	1.11022e-16	1.99885e-12	6.05711e-15
SLC6A9	231	110	3	4	248	133	121	69	235	67	271	108	1.11022e-16	1.99885e-12	6.05711e-15
SPSB1	151	160	606	221	117	195	110	189	114	173	199	245	1.11022e-16	1.99885e-12	6.05711e-15
YPEL1	66	69	5	6	40	100	59	95	31	97	59	128	1.11022e-16	1.99885e-12	6.05711e-15
ADM	359	329	46	106	326	484	224	269	311	296	467	448	2.22045e-16	3.99769e-12	1.18626e-14
DMPK	178	296	34	79	95	351	168	342	136	283	310	436	2.22045e-16	3.99769e-12	1.18626e-14
DUSP5	349	827	861	1507	319	521	184	503	332	581	383	1047	2.22045e-16	3.99769e-12	1.18626e-14
FAM213A	214	133	498	357	177	182	173	169	137	122	261	250	2.22045e-16	3.99769e-12	1.18626e-14
SNAP23	909	989	1716	2230	739	880	740	1169	776	892	1142	1493	2.22045e-16	3.99769e-12	1.18626e-14
SQLE	1226	598	2398	1525	993	562	1240	663	670	518	1546	939	2.22045e-16	3.99769e-12	1.18626e-14
TMEM41B	1001	785	1237	1889	613	739	689	717	438	575	1069	1164	2.22045e-16	3.99769e-12	1.18626e-14
C1orf52	592	424	1149	1072	562	505	467	479	565	432	689	620	3.33067e-16	5.99654e-12	1.76369e-14
NXN	1059	673	93	94	620	381	641	492	896	513	1051	714	3.33067e-16	5.99654e-12	1.76369e-14
ZNF672	505	816	1720	912	377	722	385	860	451	710	665	1251	3.33067e-16	5.99654e-12	1.76369e-14
FHDC1	303	172	10	23	154	145	207	115	140	123	277	160	4.44089e-16	7.99538e-12	2.33102e-14
HERC4	455	839	935	1232	367	617	317	575	278	654	434	862	4.44089e-16	7.99538e-12	2.33102e-14
IRS1	2388	816	170	95	1439	431	1848	462	1287	401	2542	786	4.44089e-16	7.99538e-12	2.33102e-14
MPP7	85	77	6	3	74	92	71	49	36	58	79	95	5.55112e-16	9.99423e-12	2.89688e-14
TMEM184A	150	190	2	8	127	152	253	241	212	187	207	288	5.55112e-16	9.99423e-12	2.89688e-14
LPXN	17	62	67	198	14	75	18	61	17	70	16	61	6.66134e-16	1.19931e-11	3.46621e-14
FAM109B	35	23	311	364	1	10	88	72	68	88	87	114	7.77156e-16	1.39919e-11	4.02067e-14
PARP4	1180	1183	2510	1978	1050	1209	1067	848	836	957	1425	1389	7.77156e-16	1.39919e-11	4.02067e-14
CD40	213	233	420	603	139	331	187	267	179	184	279	294	8.88178e-16	1.59908e-11	4.56879e-14
SPRY1	193	253	62	29	130	216	159	239	133	263	203	366	8.88178e-16	1.59908e-11	4.56879e-14
CKLF	344	191	532	613	303	278	224	184	340	175	398	312	9.99201e-16	1.79896e-11	5.11068e-14
TM4SF19	162	663	744	685	179	638	153	609	172	619	244	973	9.99201e-16	1.79896e-11	5.11068e-14
CHMP4B	1173	1015	2060	2198	1017	985	835	987	1025	884	1393	1484	1.11022e-15	1.99885e-11	5.66245e-14
AGPAT5	674	526	1749	944	729	506	564	489	618	695	813	643	1.22125e-15	2.19873e-11	6.19361e-14
HRSP12	350	269	841	633	384	351	312	346	353	228	462	366	1.22125e-15	2.19873e-11	6.19361e-14
KRTAP3-2	0	1	45	15	0	0	1	0	1	1	0	4	1.33227e-15	2.39861e-11	6.71881e-14
NAV3	241	130	4809	1138	1040	334	839	250	644	513	498	321	1.33227e-15	2.39861e-11	6.71881e-14
IMPA1	487	527	1083	1050	372	519	409	627	337	493	665	844	1.44329e-15	2.5985e-11	7.25838e-14
ACSS1	84	38	223	173	3	3	0	2	0	0	5	1	1.55431e-15	2.79838e-11	7.79494e-14
CNOT7	865	486	1726	1120	751	584	766	539	611	559	1088	745	1.77636e-15	3.19815e-11	8.88376e-14
KSR1	144	300	40	44	113	298	116	225	85	298	147	405	2.10942e-15	3.79781e-11	1.04912e-13
PCM1	1068	1172	2330	1721	710	1119	863	957	518	1028	1276	1698	2.10942e-15	3.79781e-11	1.04912e-13
PPP1R18	1034	1384	2406	2027	659	1318	697	1221	902	1173	1251	1982	2.22045e-15	3.99769e-11	1.10129e-13
ACTN1	3850	2852	6826	5215	3313	2516	2471	2314	3207	2182	4959	3890	2.33147e-15	4.19758e-11	1.15002e-13
ADAMTS16	9	29	104	99	10	17	0	9	6	24	23	75	2.33147e-15	4.19758e-11	1.15002e-13
CCDC64	188	285	8	46	102	250	100	186	106	159	177	294	2.44249e-15	4.39746e-11	1.20149e-13
ULK4	23	16	129	55	20	20	20	9	15	19	33	25	2.55351e-15	4.59734e-11	1.25268e-13
PRKCI	749	863	1466	1329	512	799	597	632	332	648	813	1188	2.66454e-15	4.79723e-11	1.30359e-13
FLYWCH2	130	118	325	241	98	121	74	125	106	96	145	121	2.88658e-15	5.197e-11	1.4084e-13
CDCA4	1041	323	2357	729	944	546	822	403	838	332	1262	575	2.9976e-15	5.39688e-11	1.45469e-13
FAM49A	33	33	0	0	37	40	45	27	25	36	36	30	2.9976e-15	5.39688e-11	1.45469e-13
CNDP2	1194	680	2174	1462	1061	593	1030	634	1055	609	1635	983	4.10783e-15	7.39573e-11	1.9881e-13
KLC3	357	386	99	100	310	375	268	418	340	299	345	543	4.44089e-15	7.99538e-11	2.14353e-13
BCAM	1084	1619	178	212	1153	2637	891	1541	1333	1283	1521	2420	4.88498e-15	8.79492e-11	2.35158e-13
PPM1F	983	908	425	247	1086	1009	920	957	950	891	1180	1217	5.10703e-15	9.19469e-11	2.45192e-13
ITPR2	366	328	926	457	190	271	215	204	102	282	344	466	5.32907e-15	9.59446e-11	2.54495e-13
ZMIZ1	552	369	71	77	331	386	354	295	237	268	470	479	5.32907e-15	9.59446e-11	2.54495e-13
AGPAT9	542	375	59	71	644	344	352	292	546	368	893	621	5.66214e-15	1.01941e-10	2.69686e-13
RBM25	2502	1690	3908	3196	1950	1472	1680	1396	1465	1403	2869	2333	6.10623e-15	1.09937e-10	2.9007e-13
ERI1	410	223	663	671	371	303	329	256	278	209	537	411	6.77236e-15	1.2193e-10	3.20867e-13
CPZ	379	454	71	122	230	340	226	369	259	316	408	598	7.10543e-15	1.27926e-10	3.35764e-13
RAP1GAP	361	264	66	81	281	316	282	218	231	223	381	342	7.21645e-15	1.29925e-10	3.40118e-13
UBR5	2455	2159	4429	3100	1397	1695	1642	1470	1022	1670	2369	2726	7.99361e-15	1.43917e-10	3.75762e-13
INPP5J	106	223	18	37	80	204	45	202	84	180	103	299	8.32667e-15	1.49913e-10	3.904e-13
APOL6	9	17	29	94	1	25	0	7	0	14	6	49	8.43769e-15	1.51912e-10	3.93555e-13
MTL5	94	67	1	14	68	74	60	73	46	69	78	108	8.43769e-15	1.51912e-10	3.93555e-13
PCDH1	258	245	21	73	198	372	136	195	200	267	289	341	9.21485e-15	1.65904e-10	4.28693e-13
HRASLS	0	0	29	16	0	1	0	1	0	0	0	1	9.4369e-15	1.69902e-10	4.37891e-13
B4GALT5	2187	1443	3237	3018	1762	1303	1533	1237	1382	1193	2678	2157	1.03251e-14	1.85893e-10	4.77873e-13
TOP1	3920	2768	7175	4757	3460	2396	3226	2441	2696	2180	4635	3490	1.11022e-14	1.99885e-10	5.12524e-13
ABCG4	183	286	43	58	90	296	115	284	140	305	174	377	1.31006e-14	2.35864e-10	6.03232e-13
FUCA1	359	1092	216	177	298	1367	232	1176	373	1168	550	2001	1.33227e-14	2.39861e-10	6.11891e-13
TDO2	0	3	19	30	0	1	0	2	0	3	0	0	2.25375e-14	4.05766e-10	1.03248e-12
RABGGTA	303	856	194	145	334	1138	299	905	309	806	469	1300	2.55351e-14	4.59734e-10	1.16684e-12
GINS1	1181	351	1472	1295	913	588	1058	574	857	382	1527	628	2.60902e-14	4.69729e-10	1.18919e-12
FAM208A	1519	1189	2649	2075	1282	1365	1192	981	703	1051	1504	1487	2.65343e-14	4.77724e-10	1.20637e-12
GRIP1	144	86	10	11	70	68	103	49	75	68	143	110	2.68674e-14	4.83721e-10	1.21844e-12
RIPK2	710	515	1319	1091	603	526	574	439	543	462	1004	889	3.11973e-14	5.61676e-10	1.41125e-12
KRT15	0	7	10	68	0	8	0	4	1	9	0	10	3.54161e-14	6.37632e-10	1.59807e-12
MAP7	688	413	122	150	479	307	602	360	446	348	895	463	3.58602e-14	6.45627e-10	1.61407e-12
ATP6V1B2	794	1334	1821	2411	666	1850	664	1460	652	1267	975	2204	3.80806e-14	6.85604e-10	1.70974e-12
CTF1	30	99	1	0	13	62	14	58	23	83	34	105	4.14113e-14	7.45569e-10	1.85465e-12
NR3C2	101	53	5	4	69	58	51	37	39	39	108	81	4.20775e-14	7.57562e-10	1.87981e-12
MOK	71	46	139	175	53	35	50	71	45	53	67	74	4.92939e-14	8.87487e-10	2.19675e-12
ZNF443	364	262	89	72	218	329	220	221	313	223	378	418	5.37348e-14	9.67441e-10	2.38874e-12
MYO1D	409	372	19	39	200	195	290	189	252	236	416	368	5.73985e-14	1.0334e-09	2.54533e-12
UHRF1	3517	628	3626	2153	3166	953	2582	827	2679	609	4275	1011	6.23945e-14	1.12335e-09	2.76008e-12
ROCK1	1007	1004	1830	1537	743	704	799	616	496	800	1224	1221	6.41709e-14	1.15533e-09	2.8317e-12
WDR75	873	691	1673	1326	858	751	666	634	700	627	1056	938	7.64944e-14	1.3772e-09	3.36725e-12
ATAD2	5735	1472	6559	6419	3687	2706	3718	1905	2365	1486	6370	2714	7.83817e-14	1.41118e-09	3.44191e-12
NXT1	254	99	502	320	231	150	206	137	281	111	319	169	7.91589e-14	1.42518e-09	3.46758e-12
MARVELD3	72	72	3	5	106	78	101	119	88	47	152	143	7.93809e-14	1.42917e-09	3.46887e-12
HSP90B1	8015	5412	15311	12452	6855	6624	8164	6270	8719	5917	13269	7697	8.26006e-14	1.48714e-09	3.60083e-12
CYP2S1	0	3	26	26	0	1	0	6	0	4	0	1	8.35998e-14	1.50513e-09	3.63558e-12
ZNFX1	661	1821	1567	2306	613	2046	370	1638	405	1563	708	2501	9.52571e-14	1.71501e-09	4.13255e-12
ATP8A1	221	138	4	8	161	125	148	68	64	104	246	155	1.09024e-13	1.96287e-09	4.71843e-12
SEPT5	353	692	131	131	217	711	227	545	272	548	371	802	1.09357e-13	1.96886e-09	4.72149e-12
TSTD1	128	73	362	188	98	53	135	90	146	92	193	132	1.09801e-13	1.97686e-09	4.72933e-12
HS1BP3	254	489	138	86	242	720	193	446	227	528	387	789	1.38445e-13	2.49256e-09	5.94883e-12
ROBO3	106	132	326	444	84	96	82	150	145	165	62	115	1.42442e-13	2.56452e-09	6.106e-12
TRIM35	788	1492	444	324	817	1736	613	1483	721	1582	1022	2154	1.46771e-13	2.64247e-09	6.27666e-12
PDS5B	903	319	1674	653	705	455	708	334	456	303	1019	556	1.60316e-13	2.88633e-09	6.83965e-12
RASGRP2	123	96	5	4	62	132	70	114	109	129	97	86	1.65645e-13	2.98228e-09	7.0503e-12
STAMBPL1	69	69	568	371	197	161	135	122	160	118	114	112	1.77969e-13	3.20415e-09	7.55696e-12
NIT1	304	318	592	729	218	351	225	422	254	325	366	583	1.85851e-13	3.34607e-09	7.8731e-12
PSD4	31	79	192	96	26	101	31	88	31	88	34	90	1.90958e-13	3.43801e-09	8.07046e-12
RPL26L1	490	312	844	752	464	297	407	283	518	260	756	512	2.14828e-13	3.86777e-09	9.058e-12
GSTO1	1269	1426	3824	2359	1408	1582	1216	1450	1718	1687	2093	2518	2.25375e-13	4.05766e-09	9.45841e-12
POLH	763	2733	422	782	1009	3404	648	2720	723	2809	1165	3758	2.25375e-13	4.05766e-09	9.45841e-12
HAT1	1520	587	1887	1824	1232	775	1268	800	1197	571	2031	1071	2.2693e-13	4.08564e-09	9.50149e-12
STON2	31	515	0	0	76	1005	55	481	47	626	7	579	2.43361e-13	4.38147e-09	1.01658e-11
SLC25A37	141	147	414	220	136	132	107	113	106	107	208	178	2.45248e-13	4.41545e-09	1.02209e-11
ASUN	1023	443	1414	973	856	384	721	441	701	323	1158	634	2.49356e-13	4.48941e-09	1.03681e-11
RNF157	24	15	84	51	13	19	5	12	13	22	5	16	2.70339e-13	4.86719e-09	1.12147e-11
TRMT6	903	709	1704	1384	950	823	737	739	798	618	1012	870	3.59157e-13	6.46627e-09	1.4865e-11
MSH2	1528	534	1846	1501	1146	877	1118	535	839	509	1858	900	3.616e-13	6.51024e-09	1.49317e-11
SEMA3F	283	396	95	84	229	451	186	297	202	282	330	533	3.66263e-13	6.59419e-09	1.50897e-11
OTUD6B	605	393	1139	850	650	404	571	346	437	383	951	582	3.6815e-13	6.62817e-09	1.51328e-11
CTSZ	913	937	1704	1763	699	995	771	999	770	796	1163	1311	3.87246e-13	6.97197e-09	1.58815e-11
MAPK8IP2	5	15	18	118	3	16	6	24	4	14	10	36	3.9968e-13	7.19584e-09	1.63542e-11
COL7A1	27	162	7	10	14	175	19	215	24	169	59	304	4.12337e-13	7.42371e-09	1.68338e-11
SH3RF2	327	357	0	5	227	111	238	154	229	187	702	412	4.20219e-13	7.56563e-09	1.71168e-11
TOP3B	403	537	162	136	321	538	309	531	382	476	525	753	4.42424e-13	7.9654e-09	1.79806e-11
PTPLA	36	84	89	223	38	72	34	53	38	60	65	90	4.61409e-13	8.3072e-09	1.87099e-11
BAZ2B	182	372	526	613	76	260	180	276	89	399	133	425	5.55778e-13	1.00062e-08	2.24859e-11
ZHX1	780	706	1428	1199	509	867	559	673	294	747	918	1119	5.62994e-13	1.01361e-08	2.27268e-11
XRN2	2403	1670	4357	2995	2087	1738	2092	1605	1570	1481	3079	2382	5.74096e-13	1.0336e-08	2.31231e-11
RPS4X	9600	7866	25449	15853	10472	12334	8925	8437	12717	8618	15665	13302	6.25389e-13	1.12595e-08	2.51328e-11
FAM40B	587	335	1057	692	394	548	438	423	305	379	549	487	6.70242e-13	1.2067e-08	2.68753e-11
ABHD2	787	416	1154	1027	486	654	578	392	421	537	840	745	6.90892e-13	1.24388e-08	2.76418e-11
MAGEB2	0	0	17	20	0	2	0	0	0	0	0	1	7.52731e-13	1.35522e-08	2.99827e-11
ZNF710	224	221	720	278	175	226	205	234	215	204	283	281	7.52509e-13	1.35482e-08	2.99827e-11
PPP1R10	985	1183	2126	1828	977	1246	828	1088	791	966	1273	1404	7.89591e-13	1.42158e-08	3.13814e-11
SMPDL3B	84	200	12	19	98	227	210	276	139	237	193	372	7.97584e-13	1.43597e-08	3.16293e-11
SSTR5	2	11	65	112	3	6	2	25	13	43	1	11	8.93841e-13	1.60927e-08	3.53686e-11
VWCE	15	80	3	7	29	98	25	113	18	85	24	144	9.29146e-13	1.67283e-08	3.6685e-11
FAM91A1	2528	3086	4613	4992	1870	3172	1978	2828	1468	3014	2865	4779	9.75886e-13	1.75699e-08	3.84461e-11
SYCE2	10	17	60	77	14	18	17	15	10	24	14	26	1.00187e-12	1.80376e-08	3.93834e-11
UNC5A	31	105	7	3	27	93	29	60	48	91	77	116	1.02496e-12	1.84533e-08	4.02034e-11
FGD4	120	131	0	6	49	85	110	86	37	115	116	139	1.03195e-12	1.85793e-08	4.03897e-11
RGAG1	1	184	0	0	2	223	1	161	0	267	1	305	1.14664e-12	2.06441e-08	4.47811e-11
RBL1	401	143	738	306	353	176	325	139	222	130	496	184	1.22657e-12	2.20832e-08	4.77992e-11
SLC39A14	1812	1270	3062	2206	1657	1162	1367	1121	1311	1093	2045	1658	1.3034e-12	2.34664e-08	5.06432e-11
ZC3H7B	1630	1153	1983	2576	1238	1001	1168	1004	1249	1057	1963	1613	1.30518e-12	2.34984e-08	5.06432e-11
YWHAB	4220	3455	7508	6322	3743	3570	3520	3403	3743	3025	5185	4974	1.51235e-12	2.72283e-08	5.85554e-11
PICALM	1649	1689	2635	2991	1246	1469	1365	1497	1102	1437	2014	2294	1.59084e-12	2.86415e-08	6.14624e-11
ZNF697	193	316	292	781	146	343	119	330	130	434	171	518	1.59828e-12	2.87754e-08	6.16175e-11
SBK1	395	496	88	116	195	667	362	582	254	490	336	666	1.98253e-12	3.56934e-08	7.62679e-11
TNFRSF10B	1247	2660	3145	3750	1426	2872	959	2534	1217	2609	1580	3652	2.05425e-12	3.69846e-08	7.88585e-11
S100A3	1	2	30	21	1	1	0	1	0	0	3	5	2.13274e-12	3.83978e-08	8.16975e-11
TMBIM6	7549	5772	13704	11535	6941	6568	6985	6412	6561	5243	10475	9539	2.20535e-12	3.97051e-08	8.42995e-11
PRR5L	56	52	148	166	78	84	29	60	43	65	68	82	2.23321e-12	4.02068e-08	8.51839e-11
IFNGR2	637	514	925	1167	600	493	529	526	516	466	714	714	2.28628e-12	4.11622e-08	8.70237e-11
KIAA1217	280	838	85	318	261	828	300	671	252	886	501	1335	2.29361e-12	4.12941e-08	8.71185e-11
C1orf106	17	5	51	62	0	2	0	0	0	0	34	8	2.36133e-12	4.25134e-08	8.9502e-11
PLEK2	581	433	998	1094	670	560	483	475	674	460	832	594	2.40652e-12	4.3327e-08	9.10231e-11
FDXR	537	2788	363	412	781	3974	428	3465	835	2772	869	4702	2.47902e-12	4.46322e-08	9.35686e-11
RTN4R	196	160	51	46	175	227	139	153	183	138	256	224	2.60536e-12	4.69069e-08	9.81316e-11
CCNE2	676	351	928	1684	610	852	608	587	385	488	896	697	2.76434e-12	4.97693e-08	1.03902e-10
RTN4	3346	3126	5983	5143	3123	2421	2694	2461	3216	2510	4742	4110	2.9744e-12	5.35511e-08	1.11565e-10
GIGYF2	1234	1010	2043	1433	959	723	955	715	692	752	1291	1155	3.0822e-12	5.54919e-08	1.15368e-10
GNAI1	418	630	212	167	472	729	315	645	535	721	617	1013	3.25129e-12	5.85362e-08	1.21444e-10
GCHFR	185	315	125	52	186	452	203	353	242	316	268	594	3.48799e-12	6.27977e-08	1.30016e-10
ARMCX2	2	5	35	25	0	0	0	0	0	0	6	15	3.53073e-12	6.35673e-08	1.31337e-10
ARHGEF2	607	627	953	1243	408	757	333	610	504	653	584	951	3.63432e-12	6.54322e-08	1.34912e-10
BSCL2	536	464	248	156	468	679	493	535	537	466	788	814	3.95162e-12	7.11449e-08	1.46389e-10
C11orf45	1	3	33	19	0	1	5	3	0	0	0	1	3.96605e-12	7.14048e-08	1.46622e-10
ECD	396	432	649	792	404	420	283	317	254	297	497	565	4.33553e-12	7.80569e-08	1.59953e-10
PHLDA3	439	1296	280	250	623	1866	353	1448	638	1300	700	2299	4.42391e-12	7.9648e-08	1.62879e-10
TUBB3	1458	1475	285	496	933	2114	1227	1350	1313	1387	1873	1622	4.70524e-12	8.47131e-08	1.72884e-10
GOLPH3L	284	237	684	451	281	325	283	279	212	242	377	340	4.73532e-12	8.52548e-08	1.73635e-10
ATP13A2	1348	1580	335	831	1319	1634	1203	1665	1544	1425	1710	2121	4.80904e-12	8.6582e-08	1.7598e-10
TSPYL4	362	546	859	912	307	650	313	631	271	649	469	838	4.96725e-12	8.94303e-08	1.814e-10
EPHX1	615	759	187	197	391	827	361	699	644	785	630	1010	5.06817e-12	9.12473e-08	1.84711e-10
IFIH1	130	156	25	50	92	194	133	132	98	170	164	268	5.11413e-12	9.20748e-08	1.8601e-10
BCAR3	206	279	502	420	132	180	118	166	214	238	187	298	5.35549e-12	9.64203e-08	1.94396e-10
GBP1	10	7	3	94	2	11	4	11	0	4	0	2	5.63716e-12	1.01491e-07	2.04208e-10
SEC14L4	74	102	244	255	73	117	83	90	45	74	32	38	6.00942e-12	1.08194e-07	2.17256e-10
TNFSF9	317	474	74	129	290	722	264	528	282	413	326	614	6.2983e-12	1.13395e-07	2.27244e-10
FGFR3	742	844	149	257	472	1200	364	888	401	708	617	1169	6.70763e-12	1.20764e-07	2.41529e-10
PIR	194	90	20	16	270	203	226	91	262	144	302	140	6.88971e-12	1.24042e-07	2.4759e-10
ACTR3	3343	2592	4659	4800	2651	2230	2475	2258	2380	2054	4203	3573	7.26441e-12	1.30788e-07	2.60535e-10
SGSM1	83	125	7	3	43	100	50	89	54	73	54	83	7.47891e-12	1.3465e-07	2.67694e-10
SMC1A	2991	1691	4056	4014	2369	2365	2537	1960	1786	1613	3639	2841	7.89158e-12	1.4208e-07	2.81905e-10
PHLDA1	4158	2474	7241	3399	3142	2012	3474	2238	2257	1722	4922	2828	7.93943e-12	1.42941e-07	2.83052e-10
PSD3	7	7	67	31	0	16	17	16	1	10	3	15	8.0701e-12	1.45294e-07	2.87142e-10
ENTPD4	388	528	826	804	287	511	315	481	232	553	493	800	8.23852e-12	1.48326e-07	2.92557e-10
ENPP1	381	174	128	69	373	310	297	193	306	261	465	283	8.55793e-12	1.54077e-07	3.03301e-10
ZCWPW1	34	39	98	123	31	55	24	51	45	41	22	41	8.74167e-12	1.57385e-07	3.09205e-10
ZMAT1	8	14	38	67	1	14	7	24	6	25	4	17	8.95817e-12	1.61283e-07	3.16241e-10
STAU1	2636	1776	3762	3358	2153	1640	2096	1641	1964	1405	3204	2389	9.1237e-12	1.64263e-07	3.21454e-10
FHL3	690	792	278	270	709	1111	502	927	768	735	901	1223	9.1791e-12	1.65261e-07	3.22775e-10
RAB11FIP4	581	445	182	166	430	489	527	390	383	392	732	757	9.23506e-12	1.66268e-07	3.24109e-10
BROX	298	304	513	504	154	314	212	216	100	288	301	471	9.7089e-12	1.74799e-07	3.40076e-10
FOXP1	350	170	546	415	239	180	254	210	226	188	380	299	9.73055e-12	1.75189e-07	3.40172e-10
RCN3	32	44	8	0	35	67	33	47	39	51	49	80	1.00545e-11	1.81021e-07	3.50817e-10
SLC16A9	190	121	308	264	139	106	126	75	133	124	205	163	1.05607e-11	1.90134e-07	3.67764e-10
TBC1D30	36	19	112	75	18	47	9	45	21	31	29	23	1.18126e-11	2.12673e-07	4.10566e-10
ZNF33B	603	641	256	192	536	651	498	499	416	637	853	993	1.26281e-11	2.27357e-07	4.38067e-10
MED25	142	143	328	245	114	144	80	124	141	124	146	195	1.27849e-11	2.30179e-07	4.42652e-10
SMAGP	341	303	1373	583	370	248	348	302	583	234	529	429	1.37216e-11	2.47043e-07	4.74171e-10
SYNE4	166	182	5	3	100	117	217	191	272	231	202	218	1.46769e-11	2.64243e-07	5.06213e-10
MT1E	637	241	3414	823	768	385	738	209	1258	270	1587	299	1.64757e-11	2.96629e-07	5.67168e-10
XPO7	1648	806	2696	1328	1291	663	1329	685	1028	762	1879	1125	1.7004e-11	3.06139e-07	5.84235e-10
HYOU1	5802	4792	2947	1660	4774	5040	4796	4654	5463	5102	8687	7244	1.73599e-11	3.12547e-07	5.95329e-10
TLN2	312	231	127	46	251	263	223	143	304	200	373	293	2.02305e-11	3.6423e-07	6.92452e-10
BCL2L11	712	547	152	125	459	853	577	592	341	559	550	833	2.11495e-11	3.80776e-07	7.22535e-10
LOC100996481	346	107	443	364	311	144	277	140	263	121	450	178	2.1618e-11	3.89211e-07	7.37142e-10
MYBL2	1480	280	1039	1416	1220	621	965	467	1393	363	1851	604	2.25877e-11	4.06669e-07	7.68751e-10
BRIP1	735	230	757	1252	471	518	496	343	274	301	893	498	2.28981e-11	4.12258e-07	7.77845e-10
BTG3	960	867	347	371	895	953	684	929	763	828	1434	1409	2.54606e-11	4.58393e-07	8.63264e-10
EDEM3	467	628	842	860	298	599	286	511	211	699	384	719	2.55233e-11	4.59521e-07	8.63761e-10
TFAP2E	100	139	31	35	110	176	85	145	127	138	122	204	2.57061e-11	4.62813e-07	8.68317e-10
VNN1	0	1	1	62	0	5	0	2	0	8	0	5	2.78266e-11	5.00991e-07	9.38185e-10
SMCHD1	1589	821	2617	1641	1072	876	1217	637	589	671	1704	1196	2.82295e-11	5.08244e-07	9.4999e-10
CAP1	3585	3538	6282	5765	2899	3554	2868	3162	2916	2888	4848	5226	2.89666e-11	5.21515e-07	9.72975e-10
ATP1B1	668	789	240	188	645	1000	389	617	568	751	1022	1442	3.13929e-11	5.65198e-07	1.05251e-09
KDM6A	595	472	790	783	455	304	493	277	362	343	586	540	3.15461e-11	5.67956e-07	1.05568e-09
TNKS	527	392	784	612	307	375	350	288	212	338	490	520	3.22008e-11	5.79743e-07	1.07559e-09
DNTTIP1	345	246	532	611	288	289	250	273	371	206	506	396	3.34002e-11	6.01337e-07	1.11359e-09
SGK223	171	183	76	30	118	193	129	156	198	180	245	240	3.46871e-11	6.24507e-07	1.15436e-09
CTNNBL1	790	443	1432	713	745	376	562	346	754	369	949	553	3.67627e-11	6.61876e-07	1.22117e-09
DDX10	648	338	1145	499	662	296	463	197	514	200	864	343	3.76064e-11	6.77065e-07	1.2469e-09
BRCA1	994	322	1367	1476	680	745	823	513	588	517	697	526	3.8307e-11	6.8968e-07	1.26779e-09
RAB3B	4580	4068	904	1188	3685	3027	3028	2648	2260	2989	5008	4902	3.86647e-11	6.9612e-07	1.27721e-09
TRAPPC2	635	674	275	274	625	803	590	820	583	667	958	1083	3.87336e-11	6.97359e-07	1.27721e-09
ZNF114	207	385	62	53	248	471	159	258	124	288	260	523	4.06774e-11	7.32355e-07	1.33886e-09
C21orf91	574	677	144	168	414	887	388	473	267	654	562	959	4.22189e-11	7.60109e-07	1.38615e-09
SMCR7	218	525	73	155	179	448	158	420	179	408	291	764	4.22682e-11	7.60996e-07	1.38615e-09
CYP51A1	1194	700	2165	1299	887	689	1226	689	659	613	1400	969	4.41401e-11	7.94699e-07	1.44491e-09
IFT80	345	241	561	450	239	266	297	257	167	227	345	268	4.52296e-11	8.14314e-07	1.47788e-09
IFI30	1694	1653	459	548	1623	2403	1545	1886	2070	1534	2156	2105	4.75303e-11	8.55736e-07	1.55025e-09
TMEM87B	263	417	563	681	224	436	223	361	192	461	338	610	4.84005e-11	8.71403e-07	1.57577e-09
PORCN	188	481	101	73	154	434	161	368	237	500	281	675	4.87781e-11	8.78201e-07	1.5852e-09
SDC4	554	1379	925	2483	485	1356	380	1057	471	1129	740	2435	5.15048e-11	9.27292e-07	1.6708e-09
RAB13	1248	1122	2313	2212	1028	1385	950	1550	1307	1327	1506	1601	5.7422e-11	1.03382e-06	1.8594e-09
C1QTNF2	8	10	39	48	0	16	2	17	5	12	8	14	6.14611e-11	1.10654e-06	1.98662e-09
PA2G4	3495	2095	7045	3628	3383	2439	2988	2089	3655	2047	5222	3205	6.21272e-11	1.11854e-06	2.00455e-09
DBNDD2	841	624	1657	1099	922	670	733	537	908	511	1212	900	6.31095e-11	1.13622e-06	2.0326e-09
N4BP2	300	374	483	716	171	354	207	253	118	422	281	599	6.44588e-11	1.16052e-06	2.07235e-09
FBLN5	0	6	22	23	0	6	0	3	0	3	0	5	6.46784e-11	1.16447e-06	2.0757e-09
YPEL3	58	385	22	55	28	467	60	513	48	411	49	599	6.51046e-11	1.17214e-06	2.08566e-09
PRKAB2	851	1615	465	340	682	1633	615	1363	413	1591	964	2632	6.62471e-11	1.19271e-06	2.1185e-09
FAM111B	251	114	507	688	251	362	276	247	156	210	403	308	6.68039e-11	1.20274e-06	2.13251e-09
RAB11FIP1	2217	1401	669	483	1410	1833	1185	1258	1128	1385	2481	2111	7.10877e-11	1.27986e-06	2.26524e-09
RPN2	5043	3528	7552	6963	4410	3537	4228	3365	4870	3181	6835	5307	7.13554e-11	1.28468e-06	2.26976e-09
HBE1	0	2	29	12	0	0	0	1	1	4	0	0	7.34076e-11	1.32163e-06	2.33092e-09
SLC2A10	110	200	278	290	67	163	90	165	93	169	167	257	8.16549e-11	1.47011e-06	2.58823e-09
SORBS3	640	400	1033	783	479	446	418	389	668	376	792	540	8.31938e-11	1.49782e-06	2.63237e-09
DMBX1	164	71	36	20	115	117	113	95	128	73	154	111	8.46738e-11	1.52447e-06	2.6745e-09
DBNDD1	358	441	139	98	244	455	338	526	448	480	510	716	8.66132e-11	1.55938e-06	2.73097e-09
MMP15	479	509	97	101	240	553	208	345	265	383	405	575	8.70355e-11	1.56699e-06	2.73949e-09
HOXB13	183	308	78	54	156	505	153	364	152	273	266	514	8.7819e-11	1.58109e-06	2.75932e-09
USP25	807	439	248	145	611	431	564	342	412	351	824	560	8.86703e-11	1.59642e-06	2.78122e-09
GPC1	1544	2589	801	843	1421	2310	1255	2257	1750	2322	2077	3511	9.4558e-11	1.70242e-06	2.96074e-09
ISYNA1	14	107	3	5	9	95	9	80	9	72	23	171	9.70565e-11	1.7474e-06	3.03369e-09
NUDC	2745	1700	7644	2593	2727	1617	2364	1804	3597	1517	4038	2424	1.01701e-10	1.83102e-06	3.16256e-09
RALY	1470	825	2347	1649	1254	896	1170	848	1392	777	2124	1219	1.01707e-10	1.83112e-06	3.16256e-09
ZNF331	123	106	27	11	80	95	61	68	51	90	96	142	1.01572e-10	1.82871e-06	3.16256e-09
STX1A	122	163	460	163	104	146	95	180	123	152	176	262	1.04474e-10	1.88095e-06	3.24302e-09
CCL20	0	0	7	23	0	0	0	1	0	1	0	0	1.10266e-10	1.98524e-06	3.41693e-09
ARPC1B	963	934	1774	1345	766	1019	692	769	846	706	1104	1145	1.1112e-10	2.0006e-06	3.43745e-09
TRMT12	128	105	308	182	101	117	90	112	93	96	140	169	1.13805e-10	2.04894e-06	3.51448e-09
PRRG2	46	90	10	4	25	57	28	70	40	60	58	92	1.14621e-10	2.06363e-06	3.53361e-09
PPM1D	474	1092	264	254	427	1250	378	1091	331	979	498	1521	1.23465e-10	2.22286e-06	3.79976e-09
PRIM1	490	116	603	426	405	237	438	187	353	148	530	202	1.23845e-10	2.22971e-06	3.80496e-09
ASXL1	1653	1267	2391	2284	1414	1273	1198	1176	1122	1081	1825	1899	1.31695e-10	2.37103e-06	4.03924e-09
RAD18	1017	361	1166	1083	877	528	804	506	666	398	1330	662	1.35618e-10	2.44167e-06	4.1525e-09
EFTUD1	644	537	1575	766	647	569	651	477	537	494	973	861	1.36079e-10	2.44997e-06	4.15955e-09
ARNTL2	865	509	1493	922	767	436	904	496	562	497	1205	730	1.36684e-10	2.46086e-06	4.17095e-09
BAHCC1	263	275	75	56	152	265	226	264	129	206	244	323	1.3739e-10	2.47357e-06	4.18539e-09
DHX29	511	481	1238	618	505	565	436	367	358	395	725	721	1.37712e-10	2.47937e-06	4.18812e-09
ANKRD34A	62	83	98	227	42	97	31	88	39	65	79	120	1.38768e-10	2.49837e-06	4.21311e-09
VASP	727	893	1460	1170	495	815	546	880	629	639	865	1192	1.3922e-10	2.50652e-06	4.21973e-09
ARID5B	814	252	8	2	277	334	406	259	162	270	399	388	1.51652e-10	2.73034e-06	4.58111e-09
NYAP1	124	104	19	24	76	80	114	113	87	81	113	122	1.51406e-10	2.72592e-06	4.58111e-09
COL13A1	70	82	0	3	78	109	20	46	51	81	51	78	1.55587e-10	2.80119e-06	4.6921e-09
CPT1A	2408	2156	873	789	1954	2047	1724	1701	1622	1760	2535	2635	1.58548e-10	2.8545e-06	4.77341e-09
EIF2S1	2780	1733	4111	3274	2506	1835	2168	1647	2083	1626	3554	2540	1.79562e-10	3.23284e-06	5.39707e-09
NFYA	866	735	1373	1180	606	833	641	645	505	666	935	976	1.81509e-10	3.26789e-06	5.44648e-09
PRSS22	34	89	243	94	6	17	13	24	11	16	36	87	1.83975e-10	3.31229e-06	5.51129e-09
PIGS	2023	1146	601	529	1546	1055	1398	1075	1737	931	2350	1609	1.9547e-10	3.51923e-06	5.8459e-09
HIVEP1	185	192	249	352	106	199	125	109	63	139	177	223	2.00274e-10	3.60573e-06	5.97965e-09
RBX1	458	206	746	472	447	211	445	211	518	175	703	282	2.00765e-10	3.61456e-06	5.98438e-09
MTBP	478	185	723	630	393	373	425	315	270	211	457	296	2.07196e-10	3.73036e-06	6.16588e-09
MCM5	1568	289	1522	1082	1475	572	1208	399	1593	341	1908	515	2.07691e-10	3.73927e-06	6.17041e-09
RRBP1	1050	1189	1998	1898	809	1363	821	1265	975	1023	1270	1889	2.18465e-10	3.93325e-06	6.47982e-09
C11orf41	205	150	502	237	146	113	124	77	79	78	314	184	2.19382e-10	3.94976e-06	6.49631e-09
ADCK3	608	1216	324	321	884	1578	584	1521	844	1348	806	1886	2.23993e-10	4.03277e-06	6.62196e-09
ZCCHC24	173	246	68	40	108	382	122	217	104	239	174	399	2.28535e-10	4.11455e-06	6.74516e-09
BRAF	179	183	328	251	78	147	120	110	59	141	153	230	2.37537e-10	4.27661e-06	6.99936e-09
MYH9	7340	5676	10447	9653	6376	4688	5079	4140	5960	4679	11045	8131	2.4245e-10	4.36507e-06	7.13247e-09
IGFBP6	214	254	365	857	125	303	180	404	234	375	204	418	2.59584e-10	4.67354e-06	7.62405e-09
RPS6KA3	1039	629	1498	907	678	476	722	412	489	447	1188	780	2.80692e-10	5.05357e-06	8.23058e-09
UFC1	827	629	1838	1083	946	751	783	608	1033	555	1337	914	2.82091e-10	5.07877e-06	8.25816e-09
SLC1A3	2146	304	1	1	744	203	1070	233	733	156	950	222	2.87112e-10	5.16916e-06	8.39149e-09
PRR11	757	240	1111	1136	534	640	634	429	481	390	1204	609	2.87759e-10	5.18081e-06	8.39677e-09
TMEM55A	263	242	512	540	236	376	234	258	192	335	359	436	2.88795e-10	5.19946e-06	8.41337e-09
MCM10	2376	528	1999	1908	1823	1008	1888	863	1497	613	2523	955	2.94914e-10	5.30964e-06	8.57777e-09
CCR10	34	81	119	123	29	55	24	63	40	50	47	96	3.10976e-10	5.59882e-06	9.03035e-09
FAM122B	792	608	1243	1273	729	770	601	668	756	639	1039	819	3.40025e-10	6.12182e-06	9.858e-09
SLC22A23	320	272	114	64	218	232	223	234	185	236	316	365	3.45045e-10	6.21218e-06	9.98743e-09
FAM115A	1500	1349	2415	2251	1087	1940	1084	1126	868	1098	1226	1525	3.46103e-10	6.23124e-06	1.0002e-08
CEACAM1	1	522	0	3	0	617	0	306	1	381	0	507	3.63232e-10	6.53962e-06	1.04802e-08
ARHGAP44	318	266	118	77	264	288	240	300	182	249	337	362	3.84949e-10	6.93062e-06	1.1089e-08
CD27	10	9	56	42	3	9	4	17	10	26	13	19	4.02109e-10	7.23957e-06	1.15648e-08
CYB5A	126	81	235	221	146	79	152	70	176	60	218	119	4.49054e-10	8.08477e-06	1.28889e-08
GJA3	166	185	27	40	106	199	98	137	58	120	145	251	4.49578e-10	8.09421e-06	1.28889e-08
ZC3H18	664	449	990	905	598	404	467	469	639	448	782	665	4.50966e-10	8.11919e-06	1.29081e-08
CAV2	377	363	64	167	283	308	392	389	247	384	462	524	4.61305e-10	8.30534e-06	1.31831e-08
CARD10	395	604	163	205	398	553	259	543	377	506	510	848	4.75875e-10	8.56765e-06	1.35779e-08
RNF19A	770	975	1018	1450	468	906	461	671	340	763	769	1391	4.83723e-10	8.70896e-06	1.378e-08
C22orf32	121	134	339	174	102	97	107	98	123	73	216	164	4.89746e-10	8.81738e-06	1.39295e-08
DCAF6	608	348	630	667	330	239	421	252	347	252	706	454	4.95625e-10	8.92322e-06	1.40745e-08
PIK3C2B	624	611	298	121	375	677	371	485	343	535	611	910	5.06347e-10	9.11626e-06	1.43563e-08
MCM8	856	390	1099	1243	591	790	624	542	384	452	974	712	5.14387e-10	9.26103e-06	1.45614e-08
P4HTM	161	291	72	54	116	361	119	372	156	417	255	579	5.60126e-10	1.00845e-05	1.58313e-08
MBP	557	406	210	124	320	314	453	338	406	338	688	582	5.61078e-10	1.01016e-05	1.58333e-08
ADCYAP1R1	0	3	14	29	0	2	0	3	0	2	1	11	5.88159e-10	1.05892e-05	1.65715e-08
SMAD3	1427	749	71	145	655	538	688	521	613	502	1465	955	6.03346e-10	1.08626e-05	1.69729e-08
MAPK15	28	26	103	90	14	20	48	37	22	27	56	51	6.07244e-10	1.09328e-05	1.70559e-08
NKD2	220	357	99	78	172	393	118	365	189	292	228	452	6.09131e-10	1.09668e-05	1.70822e-08
ADAMTS17	35	29	2	2	33	35	24	31	22	40	40	30	6.28077e-10	1.13079e-05	1.75862e-08
KLF5	296	533	29	200	416	856	208	521	258	609	304	791	6.667e-10	1.20033e-05	1.86386e-08
SYTL1	144	590	50	28	189	582	167	902	286	772	295	1054	6.6951e-10	1.20539e-05	1.86881e-08
CSE1L	5883	2109	7997	4529	5192	2977	4514	2259	4547	2100	7574	3268	6.75159e-10	1.21556e-05	1.88167e-08
RAC3	1434	966	756	367	1522	1111	1354	904	1571	830	2152	1284	7.18258e-10	1.29315e-05	1.99869e-08
ABCB6	836	1102	429	321	836	1793	897	1484	1031	1505	1244	1831	7.1959e-10	1.29555e-05	1.9993e-08
CGN	386	435	162	113	293	485	278	338	244	334	463	516	7.47459e-10	1.34572e-05	2.07354e-08
PALM3	622	199	156	60	387	226	332	190	439	132	740	266	7.63107e-10	1.3739e-05	2.11369e-08
CD8A	0	1	31	12	0	3	2	2	1	2	0	2	7.76325e-10	1.3977e-05	2.147e-08
KBTBD11	217	157	372	280	176	130	185	149	139	104	259	212	7.89569e-10	1.42154e-05	2.18028e-08
ACO2	1745	1476	855	512	1606	1351	1403	1295	1724	1282	2128	1893	8.22587e-10	1.48099e-05	2.26797e-08
BTN3A1	169	167	68	26	129	239	190	183	87	196	223	263	8.4479e-10	1.52096e-05	2.32563e-08
FILIP1L	5	40	22	106	1	46	5	37	1	34	2	70	8.4611e-10	1.52334e-05	2.3257e-08
CYTH3	718	599	246	239	622	647	449	560	438	546	792	869	8.64771e-10	1.55693e-05	2.37337e-08
RUVBL1	1389	586	1964	1135	1375	397	1178	604	1476	548	1814	698	8.69995e-10	1.56634e-05	2.38408e-08
GNAS	9312	6115	13093	11307	7692	7165	7177	6281	8018	4969	11249	8684	8.75167e-10	1.57565e-05	2.39461e-08
SS18L2	111	79	300	167	125	99	123	87	165	56	195	99	9.0364e-10	1.62691e-05	2.46876e-08
FBXO44	842	1124	364	371	655	1007	623	1086	705	926	846	1395	9.10341e-10	1.63898e-05	2.4833e-08
BCCIP	1485	834	2902	1260	1477	710	1199	781	1469	737	2149	1225	9.12906e-10	1.6436e-05	2.48653e-08
OSBPL10	407	303	87	173	410	329	342	316	350	286	545	461	9.56274e-10	1.72168e-05	2.60072e-08
BDNF	169	280	0	7	176	302	39	99	303	269	258	343	9.73189e-10	1.75213e-05	2.64273e-08
GLS2	303	1046	268	231	350	1257	333	1200	309	993	565	1754	1.02712e-09	1.84922e-05	2.78497e-08
AMN1	97	107	25	17	101	92	68	89	70	81	75	105	1.0749e-09	1.93525e-05	2.90579e-08
MTHFD1	3676	1305	3935	2862	2861	1255	2988	1371	2802	1130	4714	1810	1.0733e-09	1.93237e-05	2.90579e-08
PTK2	2989	1272	3547	1879	2126	791	1971	814	1681	946	3396	1481	1.07974e-09	1.94397e-05	2.9145e-08
SMAD7	108	132	19	43	69	153	67	113	79	141	121	193	1.15195e-09	2.07398e-05	3.10475e-08
LPIN1	1314	899	3620	1045	682	813	1248	881	549	876	1339	1346	1.19998e-09	2.16045e-05	3.22937e-08
MAN1A1	190	117	13	16	114	157	108	77	64	84	179	117	1.25131e-09	2.25285e-05	3.36247e-08
NEURL	129	108	42	16	107	125	65	95	94	71	144	145	1.28152e-09	2.30724e-05	3.43851e-08
ZNF165	123	312	49	87	98	384	158	399	117	269	250	524	1.3485e-09	2.42784e-05	3.61286e-08
NKD1	524	361	170	147	373	510	388	349	316	331	543	483	1.50618e-09	2.71173e-05	4.02932e-08
MXD4	312	793	173	166	256	763	223	902	289	649	325	1138	1.54038e-09	2.7733e-05	4.11468e-08
RDH10	928	1782	562	448	898	2266	666	1621	703	1506	978	2193	1.55094e-09	2.7923e-05	4.13675e-08
SAMM50	511	489	943	680	375	391	390	423	487	342	672	635	1.60599e-09	2.89143e-05	4.27727e-08
PDIA3	6427	5112	11230	9182	6204	5563	5794	5081	7368	5194	9927	7254	1.70565e-09	3.07085e-05	4.53597e-08
FAM179B	137	169	324	221	85	219	97	115	72	211	146	260	1.72292e-09	3.10194e-05	4.57513e-08
POLG	1309	1411	655	490	1177	1671	1044	1269	996	1168	1626	1989	1.76203e-09	3.17236e-05	4.67211e-08
MBNL2	962	774	394	254	765	717	725	637	523	665	1109	949	1.80105e-09	3.24261e-05	4.76855e-08
SLC38A2	3953	2776	6426	4470	3087	3407	2714	2523	1520	2137	3303	3533	1.80607e-09	3.25165e-05	4.77481e-08
PDE7B	1753	341	0	1	1278	226	238	26	855	151	2120	365	1.82279e-09	3.28176e-05	4.81196e-08
RNF122	163	80	23	8	63	115	87	105	74	70	110	130	1.83621e-09	3.30592e-05	4.84029e-08
CEP192	789	482	1050	869	466	573	530	436	368	485	830	809	1.91409e-09	3.44613e-05	5.0382e-08
FAM110A	56	72	108	200	42	131	48	88	45	73	56	104	1.96102e-09	3.53062e-05	5.1542e-08
PACS2	592	669	317	218	544	542	557	650	677	525	950	927	2.07229e-09	3.73096e-05	5.43871e-08
GNL1	1200	891	1669	1482	810	901	753	884	837	727	1375	1300	2.24006e-09	4.03301e-05	5.86193e-08
NEDD4	677	555	928	825	517	574	405	388	324	425	684	691	2.23814e-09	4.02954e-05	5.86193e-08
SPCS3	1944	1554	3431	2493	1856	1711	1665	1528	1462	1603	2546	2210	2.41293e-09	4.34423e-05	6.30513e-08
ACTL8	12	5	80	25	27	7	13	5	29	3	20	6	2.44704e-09	4.40565e-05	6.38501e-08
KDM4A	1303	1392	679	443	1266	1466	935	1328	950	1280	1315	1993	2.45248e-09	4.41544e-05	6.38993e-08
SIPA1L1	706	350	1389	445	541	269	713	254	474	228	1027	439	2.52808e-09	4.55156e-05	6.5774e-08
ATP6V1C1	2502	3330	3755	4663	2011	3368	1948	2374	1474	2268	3023	4542	2.70127e-09	4.86337e-05	7.01785e-08
PLA2G12A	882	787	265	428	779	918	743	728	611	730	1276	1203	2.72675e-09	4.90923e-05	7.07382e-08
ARHGEF37	50	142	10	10	30	115	68	150	41	121	41	138	2.73771e-09	4.92898e-05	7.09205e-08
SLC9A7	641	574	1224	726	582	396	547	459	483	465	787	712	2.75485e-09	4.95983e-05	7.12619e-08
CCNG1	2512	3617	1160	1161	2695	5928	2401	3892	1932	3390	3709	6102	2.76724e-09	4.98214e-05	7.14797e-08
FKBP1A	3022	2978	4987	4922	3223	2590	2544	2566	3233	2385	4679	4218	2.78862e-09	5.02064e-05	7.19289e-08
YWHAZ	16273	11243	22452	17748	12768	10219	12698	9888	10757	8707	20886	15374	2.89254e-09	5.20773e-05	7.45025e-08
SLC16A14	744	453	334	164	698	807	535	447	575	607	945	737	2.90622e-09	5.23235e-05	7.47479e-08
USP2	66	102	12	2	71	80	90	95	129	76	89	89	2.98651e-09	5.37691e-05	7.67034e-08
AGPS	1241	761	1879	1122	811	482	1005	487	767	597	1665	1103	3.37518e-09	6.07667e-05	8.65623e-08
EPB41L2	2799	1164	2726	2539	1893	1455	1774	1066	1587	1142	3090	1734	3.46397e-09	6.23653e-05	8.85871e-08
LGR4	646	437	143	79	482	574	417	345	223	395	802	631	3.46104e-09	6.23126e-05	8.85871e-08
SLC25A6 (NC_000023 1504544..1511539)	4666	3745	2400	1504	5248	4862	4354	3662	5664	3326	7057	5411	3.63574e-09	6.54578e-05	9.28479e-08
ACSL4	1979	1721	2939	2140	1458	1312	1403	1199	1000	1355	2280	1965	3.70256e-09	6.66609e-05	9.44206e-08
MTDH	6875	4251	10814	6133	5910	4134	5081	3117	5029	3853	8534	5783	3.80175e-09	6.84466e-05	9.68128e-08
ID3	1902	1486	98	90	1347	1501	1015	592	742	445	1898	1281	3.81873e-09	6.87524e-05	9.71078e-08
SERPINE2	0	4	13	30	0	4	0	2	0	1	2	13	3.83118e-09	6.89766e-05	9.72872e-08
EFNA1	192	370	49	109	162	446	151	316	101	233	239	466	4.0543e-09	7.29936e-05	1.02808e-07
MATN3	0	6	12	32	0	4	0	5	0	5	1	8	4.06282e-09	7.3147e-05	1.02879e-07
IL16	17	33	3	2	13	65	18	48	11	55	27	69	4.08598e-09	7.35639e-05	1.0332e-07
JAG1	4223	825	296	127	3597	691	3308	748	1937	508	3705	748	4.10038e-09	7.38233e-05	1.03539e-07
FAM59A	201	155	68	31	157	157	109	122	95	152	182	208	4.1751e-09	7.51685e-05	1.05278e-07
ORC2	441	330	730	525	361	310	351	282	302	300	528	446	4.24069e-09	7.63493e-05	1.06782e-07
ADORA2A	34	46	6	4	15	56	20	58	24	49	47	92	4.41174e-09	7.9429e-05	1.10934e-07
CAPN2	2626	3116	9015	2342	2725	2879	2257	3031	3026	3141	4452	4707	4.56732e-09	8.223e-05	1.14686e-07
MST4	1066	809	1581	1389	877	975	900	829	686	681	1261	1067	4.63282e-09	8.34093e-05	1.16169e-07
AGRN	2320	5812	874	1321	1934	4910	1777	3508	2003	3810	3259	7550	4.64472e-09	8.36235e-05	1.16305e-07
GRB10	1071	601	384	247	1010	584	749	451	799	452	1273	799	4.66555e-09	8.39985e-05	1.16665e-07
PAG1	73	110	3	4	34	182	31	73	18	130	52	137	4.77609e-09	8.59887e-05	1.19263e-07
ASIC5	0	1	4	28	0	0	1	1	0	0	0	2	4.95619e-09	8.92312e-05	1.23589e-07
SERINC2	372	645	140	232	239	745	322	769	403	595	401	858	4.96648e-09	8.94165e-05	1.23674e-07
EPHA10	38	68	8	9	32	57	49	62	40	43	66	62	5.12953e-09	9.2352e-05	1.27558e-07
FOXO1	396	299	170	77	291	364	233	267	212	314	406	392	5.29461e-09	9.53241e-05	1.31482e-07
ID1	508	283	42	69	480	457	328	217	261	200	502	314	5.43357e-09	9.7826e-05	1.34747e-07
CCDC121	100	40	16	6	52	79	71	60	49	45	100	52	5.56259e-09	0.000100149	1.37756e-07
FBRS	236	357	465	671	204	424	188	449	271	425	291	557	5.62457e-09	0.000101265	1.391e-07
ABI2	1479	643	1821	1209	926	547	940	531	671	507	1805	870	5.71544e-09	0.000102901	1.41153e-07
KIAA0040	344	238	105	83	198	265	231	226	174	209	352	361	5.78106e-09	0.000104082	1.42578e-07
PRKX	2224	2365	1229	707	2136	1810	1809	1836	1562	1905	2917	2937	6.19358e-09	0.000111509	1.52543e-07
CTNNBIP1	149	205	59	51	86	176	119	197	131	188	200	272	6.22133e-09	0.000112009	1.53017e-07
WDR35	879	449	1442	625	746	392	679	330	570	414	1066	513	6.23793e-09	0.000112308	1.53217e-07
MEGF6	21	185	5	8	8	281	8	174	6	147	17	279	6.44362e-09	0.000116011	1.58053e-07
COL18A1	273	213	107	44	233	234	217	184	315	220	299	229	6.7532e-09	0.000121585	1.65421e-07
CD83	219	289	220	836	218	287	176	305	218	360	287	497	6.80704e-09	0.000122554	1.66514e-07
SNRPB	3077	1396	4799	2648	2772	1785	2536	1506	3001	1248	4339	2295	6.9265e-09	0.000124705	1.69206e-07
KIF26A	160	141	245	306	132	169	124	150	148	112	201	166	7.21485e-09	0.000129896	1.76011e-07
ARRDC4	724	879	253	391	596	787	614	859	502	704	818	1252	7.23528e-09	0.000130264	1.76032e-07
TMC8	116	108	9	5	26	71	93	108	50	83	90	139	7.23358e-09	0.000130233	1.76032e-07
METTL9	790	437	1238	783	674	513	658	457	661	370	953	643	7.28874e-09	0.000131226	1.77094e-07
NASP	2959	933	3309	2327	2748	1373	2416	1233	2391	808	3782	1508	7.48905e-09	0.000134833	1.81716e-07
ATF3	515	700	31	188	202	1190	116	839	214	740	240	1058	7.72761e-09	0.000139128	1.87252e-07
CAPZA1	3558	2770	6972	3628	3114	2409	2980	2677	3086	2603	5010	4018	8.10768e-09	0.000145971	1.96197e-07
PLXDC1	19	33	3	3	17	54	19	53	17	59	20	62	8.37297e-09	0.000150747	2.02345e-07
ZRSR2	276	363	138	120	269	429	211	413	238	349	338	558	8.5387e-09	0.000153731	2.06073e-07
SHROOM2	172	210	69	50	125	213	117	201	106	178	218	274	9.04215e-09	0.000162795	2.17932e-07
RAB8B	696	471	1043	713	388	465	506	435	349	478	752	762	9.0994e-09	0.000163826	2.18787e-07
TMX1	1341	888	2294	1616	1365	1282	1160	848	1123	900	1871	1442	9.10197e-09	0.000163872	2.18787e-07
CHMP7	478	476	852	784	386	604	381	534	386	435	564	751	9.24114e-09	0.000166377	2.21837e-07
CDCA7L	1135	442	1340	957	769	541	884	479	796	506	1270	623	9.76211e-09	0.000175757	2.34031e-07
C2orf55	24	54	3	2	15	38	14	42	23	32	26	54	9.91593e-09	0.000178526	2.37402e-07
ENAH	2739	1799	499	762	1756	1318	1743	1196	1411	1354	3025	2277	9.95006e-09	0.000179141	2.37903e-07
MAPRE2	2304	1001	445	553	1504	1088	1818	1061	1350	891	2099	1237	1.03546e-08	0.000186425	2.47248e-07
SIRT4	59	78	10	18	63	75	41	79	34	76	63	95	1.0458e-08	0.000188285	2.49384e-07
HIVEP3	196	171	67	51	160	138	168	136	147	122	257	262	1.05157e-08	0.000189325	2.5043e-07
SLC25A6 (NC_000024 1454544..1461539)	5049	3772	2861	1531	5184	4706	4427	3905	5795	3124	7128	5473	1.05429e-08	0.000189814	2.50745e-07
PIP4K2A	621	551	1006	799	495	490	436	437	562	513	707	637	1.07215e-08	0.00019303	2.54657e-07
SORBS1	117	116	29	37	85	147	98	128	54	136	114	151	1.07932e-08	0.000194321	2.56022e-07
NFKB1	720	750	1176	1345	772	661	444	409	621	758	996	1044	1.10448e-08	0.000198851	2.61647e-07
PFDN2	897	566	1746	887	1009	539	721	605	1039	487	1331	747	1.124e-08	0.000202366	2.65921e-07
CITED4	144	104	193	251	108	122	107	95	108	97	149	155	1.12939e-08	0.000203335	2.66844e-07
RNF213	753	1532	1503	1488	392	1661	502	984	252	1242	803	2125	1.144e-08	0.000205966	2.69942e-07
SCPEP1	805	864	396	378	709	1189	696	746	696	866	1171	1403	1.17702e-08	0.000211911	2.77371e-07
SEC23IP	1136	1000	1633	1513	875	739	1057	784	813	800	1416	1343	1.17938e-08	0.000212335	2.77563e-07
CAT	551	325	335	78	464	399	541	313	401	304	643	482	1.18597e-08	0.000213521	2.78748e-07
PPIL2	805	715	366	315	755	687	681	745	767	666	1035	1136	1.18999e-08	0.000214246	2.79329e-07
NEMF	729	620	1279	816	522	631	574	519	423	536	913	909	1.20373e-08	0.00021672	2.82188e-07
PARP6	429	625	241	158	289	525	384	583	359	566	477	787	1.20648e-08	0.000217214	2.82463e-07
AMOTL2	3001	2687	509	1024	2034	2404	1324	1759	1701	1841	3081	3228	1.3082e-08	0.000235528	3.05881e-07
DNMT1	4200	2000	5089	4186	3655	2397	3337	2175	3393	1876	5410	3153	1.31577e-08	0.000236891	3.07252e-07
FRMD5	283	183	50	38	211	135	344	134	221	167	485	205	1.34382e-08	0.000241941	3.13395e-07
NFE2L3	546	520	164	194	515	498	304	339	457	388	747	718	1.36606e-08	0.000245946	3.18171e-07
CCDC69	581	744	267	273	376	811	495	724	453	642	697	1065	1.38081e-08	0.000248601	3.2119e-07
DEPTOR	28	29	3	2	35	42	26	22	27	30	32	22	1.41591e-08	0.00025492	3.28929e-07
GJD3	172	315	93	65	167	338	75	308	123	343	197	426	1.46645e-08	0.00026402	3.40233e-07
ROR1	116	71	7	5	91	71	55	44	34	42	137	69	1.53156e-08	0.000275743	3.54881e-07
SLC29A3	173	236	78	83	192	266	127	257	173	274	209	350	1.55776e-08	0.000280459	3.60487e-07
SAC3D1	306	301	171	108	283	466	232	368	338	323	399	501	1.57112e-08	0.000282865	3.63113e-07
IDUA	11	157	9	15	11	139	8	137	14	167	18	244	1.58694e-08	0.000285712	3.66297e-07
TMEM129	313	408	227	104	242	476	289	483	324	404	552	703	1.59962e-08	0.000287995	3.68751e-07
DCAF13	1998	1406	3471	2361	2074	1376	1763	1486	1888	1332	2927	2302	1.61451e-08	0.000290676	3.71708e-07
LMTK3	51	80	9	4	27	51	52	64	46	59	39	64	1.64468e-08	0.000296109	3.78172e-07
SKA3	900	263	1396	1283	1157	788	835	496	908	438	1322	586	1.6538e-08	0.00029775	3.79783e-07
ABHD14B	254	384	615	489	244	381	216	333	295	373	316	553	1.65662e-08	0.000298259	3.79947e-07
SLC12A6	80	287	234	428	32	331	42	282	72	412	108	453	1.71173e-08	0.00030818	3.92087e-07
IPO7	3503	2845	5432	4093	3554	2705	3160	2050	2209	2157	4924	3786	1.71701e-08	0.000309131	3.92797e-07
ARHGEF10	458	384	693	610	359	375	348	298	305	282	631	566	1.73842e-08	0.000312985	3.96798e-07
KAZN	486	376	277	71	473	301	318	265	355	263	567	441	1.73891e-08	0.000313074	3.96798e-07
WNK1	2032	1703	2738	2404	1303	1697	1479	1237	977	1553	2186	2364	1.77547e-08	0.000319655	4.04626e-07
CLIC1	4424	3462	7939	5120	3644	3540	3660	3383	4658	3162	6244	5144	1.78099e-08	0.000320649	4.05371e-07
ADHFE1	15	73	3	7	15	53	18	75	34	80	51	90	1.8495e-08	0.000332984	4.20435e-07
RASA2	238	150	611	188	144	162	205	119	69	158	183	194	1.85277e-08	0.000333573	4.20646e-07
TPM4	7782	4471	11403	6657	6938	4384	5613	3617	6009	3273	11427	6010	1.9771e-08	0.000355958	4.47841e-07
ZXDB	253	313	529	424	163	481	181	335	155	368	266	536	1.97752e-08	0.000356034	4.47841e-07
SH3RF3 (NC_000002 110258566..110262707)	62	61	23	3	58	42	54	42	56	37	94	79	2.00504e-08	0.000360988	4.53502e-07
GPR19	2	3	22	48	6	11	11	9	8	9	8	5	2.03039e-08	0.000365551	4.58658e-07
SYAP1	2814	3578	1316	1353	2173	3411	1861	2944	2086	2814	3518	5002	2.06853e-08	0.000372417	4.66688e-07
KIAA1429	1356	1076	1848	1259	834	977	758	704	678	810	1188	1332	2.07278e-08	0.000373183	4.67063e-07
SLCO1B7	9	43	0	0	8	24	3	23	9	34	13	33	2.12535e-08	0.000382649	4.78311e-07
FAM98C	230	322	159	81	248	401	213	325	268	289	357	408	2.13198e-08	0.000383841	4.79202e-07
VEGFC	0	0	34	2	0	0	0	3	0	1	0	0	2.22998e-08	0.000401486	5.00606e-07
ALG9	616	611	397	175	471	587	561	625	562	579	933	912	2.26332e-08	0.000407489	5.07458e-07
SERPINB6	725	585	1210	974	633	598	631	605	738	482	1065	788	2.299e-08	0.000413912	5.14815e-07
FCGBP	14	73	0	5	10	90	4	51	4	86	7	85	2.30299e-08	0.000414631	5.1507e-07
SEC31B	115	229	43	48	55	169	93	218	68	195	129	299	2.33091e-08	0.000419657	5.20666e-07
LFNG	118	100	33	14	99	183	67	100	94	99	95	145	2.35617e-08	0.000424204	5.25656e-07
ATOH8	21	33	0	0	25	59	22	39	19	31	13	16	2.36222e-08	0.000425295	5.25704e-07
RTKN2	57	30	3	12	50	57	54	54	27	41	74	47	2.36088e-08	0.000425054	5.25704e-07
GALK2	309	159	501	234	213	93	303	119	231	113	340	197	2.37687e-08	0.000427932	5.28312e-07
DZIP3	342	419	552	692	231	580	268	497	232	449	306	551	2.38605e-08	0.000429584	5.29696e-07
KIAA1755	0	5	18	17	0	3	0	2	0	6	0	8	2.41892e-08	0.000435502	5.36333e-07
RRM2	3490	1353	5405	5441	3560	3579	3330	2760	3840	2246	5238	3142	2.50747e-08	0.000451445	5.55283e-07
SATB2	416	316	578	451	242	338	253	252	190	235	415	434	2.57926e-08	0.00046437	5.70479e-07
NR1D2	540	276	139	62	339	372	285	235	245	383	516	387	2.65154e-08	0.000477384	5.85747e-07
CAMK1D	421	167	80	52	287	101	273	83	218	116	457	201	2.65968e-08	0.000478848	5.86824e-07
ATXN1	154	127	9	5	49	66	96	69	49	124	146	164	2.70521e-08	0.000487045	5.96139e-07
EFR3B	210	102	9	3	69	147	76	88	60	89	103	117	2.73318e-08	0.000492082	6.01568e-07
MFNG	25	12	0	0	20	17	26	26	17	6	16	35	2.80767e-08	0.000505493	6.17208e-07
ITIH4	7	42	2	0	12	35	10	25	13	33	21	58	2.81795e-08	0.000507344	6.18712e-07
TOB2	1017	1074	1918	1299	730	1296	703	1270	685	935	1081	1607	2.82403e-08	0.000508438	6.19291e-07
HAPLN3	21	93	1	1	9	73	15	117	18	116	21	90	2.88061e-08	0.000518626	6.30932e-07
JMY	892	862	348	199	572	789	581	649	368	849	811	1138	2.89297e-08	0.00052085	6.32867e-07
CCND1	3786	3181	1857	779	3572	2484	2818	1724	2790	1817	5063	3154	2.98554e-08	0.000537517	6.52326e-07
ARHGAP31	288	397	561	446	158	436	195	248	185	423	319	537	3.08731e-08	0.00055584	6.73746e-07
TGFB1I1	256	287	398	419	235	258	130	208	190	154	314	399	3.11186e-08	0.000560259	6.7828e-07
FANCL	219	190	355	428	167	252	216	245	199	209	328	282	3.1408e-08	0.00056547	6.83761e-07
DTL	2047	628	1691	2229	1723	1386	1444	1065	1319	848	2327	1251	3.19061e-08	0.000574438	6.93421e-07
KLF15	89	85	31	15	57	54	85	90	74	73	125	112	3.19288e-08	0.000574846	6.93421e-07
MFSD1	338	589	671	745	277	478	265	419	372	516	496	704	3.24012e-08	0.00058335	7.02832e-07
SLC35C2	297	383	540	550	228	346	220	420	265	376	300	508	3.28447e-08	0.000591336	7.11596e-07
RASSF5	146	98	58	21	149	96	144	77	91	76	184	132	3.44146e-08	0.000619601	7.44713e-07
CELSR2	1434	1166	605	425	790	1344	911	1005	782	939	1524	1704	3.52352e-08	0.000634375	7.61554e-07
CCDC111	191	108	282	271	158	171	152	129	115	127	233	192	3.64216e-08	0.000655734	7.86046e-07
NUAK1	369	515	169	142	198	707	207	489	146	568	358	859	3.64557e-08	0.000656348	7.86046e-07
ASB1	932	948	3927	1432	710	591	660	572	566	552	1857	2161	3.74609e-08	0.000674446	8.06754e-07
SLC2A12	89	164	35	35	60	168	63	145	58	194	84	238	3.79893e-08	0.000683959	8.17156e-07
PEX2	915	406	471	195	920	594	906	459	762	440	1264	649	3.90083e-08	0.000702305	8.38073e-07
PACSIN2	1204	780	1503	1431	913	822	851	822	929	767	1301	1099	3.91854e-08	0.000705494	8.40874e-07
CEP41	437	151	555	314	272	173	327	153	362	170	415	185	3.94519e-08	0.000710292	8.45585e-07
RYR2	4	26	173	126	6	60	6	27	22	118	1	53	4.11705e-08	0.000741233	8.81371e-07
MAPK1	2698	1950	1161	816	2138	1794	2139	1630	1711	1616	3347	2581	4.14876e-08	0.000746944	8.87106e-07
LASP1	3209	2480	4045	4120	2731	2575	2095	2094	2365	2079	4034	3547	4.20793e-08	0.000757595	8.98689e-07
DPM1	765	584	1054	919	686	449	584	496	635	403	1017	762	4.22027e-08	0.000759818	9.00258e-07
NUP50	2741	1671	4378	2667	2243	2295	2181	1877	1675	1746	3114	2806	4.27844e-08	0.000770291	9.11587e-07
CENPK	363	128	313	438	292	211	320	185	243	148	411	195	4.33616e-08	0.000780683	9.22793e-07
RBM47	22	25	0	1	16	30	11	24	11	25	12	19	4.40014e-08	0.000792201	9.35303e-07
C3	0	18	5	92	0	11	0	8	0	35	0	22	4.42158e-08	0.000796061	9.38751e-07
RDH13	333	275	168	70	314	221	271	174	267	256	357	369	4.45383e-08	0.000801868	9.44486e-07
RBM42	360	310	744	478	294	418	257	364	361	310	489	519	4.46206e-08	0.000803349	9.45116e-07
USO1	893	1222	1578	1629	772	1174	722	1198	565	1252	1038	1815	4.63284e-08	0.000834097	9.80138e-07
EMILIN2	0	4	24	9	0	1	0	1	0	6	0	4	4.64874e-08	0.00083696	9.82347e-07
PRCD	5	31	0	0	1	34	5	15	9	25	11	47	4.69132e-08	0.000844625	9.90182e-07
CAMK2N2	136	44	219	118	41	49	47	37	51	12	112	72	4.76981e-08	0.000858756	1.00557e-06
GALNT10	514	734	320	198	497	732	439	608	453	650	575	820	4.86038e-08	0.000875063	1.02347e-06
PDGFA	291	298	77	128	146	351	157	280	163	269	298	437	4.97358e-08	0.000895443	1.04608e-06
KRTAP4-9	0	0	8	9	0	0	0	0	0	0	0	0	5.00669e-08	0.000901405	1.05181e-06
RBMS1	73	56	4	10	23	46	46	42	29	63	73	96	5.03451e-08	0.000906413	1.05643e-06
PIGT	1094	788	1936	1343	1029	968	802	679	1038	695	821	752	5.1272e-08	0.000923101	1.07462e-06
STAT3	1446	3184	842	1087	1305	3513	1122	3153	952	2926	1636	4402	5.43902e-08	0.000979241	1.13848e-06
VDR	261	379	128	127	359	529	250	426	271	372	296	525	5.44451e-08	0.00098023	1.13848e-06
APOL2	474	1424	133	746	531	1996	315	1637	346	1238	615	2093	5.45879e-08	0.0009828	1.14014e-06
ARHGDIB	0	2	3	22	0	0	0	0	0	0	0	1	5.52033e-08	0.000993879	1.1512e-06
ZNF219	235	647	194	151	204	864	204	741	225	671	339	1246	5.52455e-08	0.00099464	1.1512e-06
PMM1	296	241	464	468	249	375	178	271	243	243	352	380	5.54957e-08	0.000999145	1.15508e-06
SSR3	3876	4945	14654	7046	5282	5508	3543	3753	5239	5723	8584	10054	5.63352e-08	0.00101426	1.1712e-06
REEP1	236	173	81	53	154	178	189	167	124	136	257	210	5.84838e-08	0.00105294	1.21447e-06
NUP153	2826	1378	3533	2204	2235	1313	2127	1068	1635	1284	3454	1924	5.90158e-08	0.00106252	1.2241e-06
CYP2R1	127	145	202	302	114	198	90	168	102	127	141	207	5.92327e-08	0.00106643	1.22719e-06
TUBB6	144	138	48	53	147	195	132	124	106	119	189	195	5.93445e-08	0.00106844	1.22809e-06
POP1	780	919	1398	1508	1076	918	882	812	810	797	1093	1255	6.1814e-08	0.0011129	1.27773e-06
DCXR	558	447	386	159	517	580	522	526	667	527	971	764	6.25275e-08	0.00112575	1.29099e-06
KIF3B	1091	978	1801	1368	858	1022	867	917	729	982	1293	1424	6.5302e-08	0.0011757	1.34673e-06
TXNRD3	48	44	97	85	40	35	33	47	26	31	42	39	6.54898e-08	0.00117908	1.34906e-06
ANXA2	10026	8566	15398	9629	7487	5574	6421	5981	8535	5605	13131	10509	6.8811e-08	0.00123887	1.41416e-06
DDB2	582	1485	406	388	649	1960	628	1917	621	1284	885	2458	6.8823e-08	0.00123909	1.41416e-06
HAS3	296	224	135	78	230	336	193	294	171	236	340	367	6.89642e-08	0.00124163	1.41416e-06
MTMR9	283	283	353	446	170	310	184	212	121	238	247	378	6.89401e-08	0.0012412	1.41416e-06
OFD1	733	888	338	420	531	1017	619	1087	562	943	908	1383	7.00696e-08	0.00126153	1.43519e-06
CTSC	1884	918	2700	1796	2059	1198	1806	923	1985	880	2522	1216	7.04591e-08	0.00126855	1.43826e-06
MRAS	242	388	115	95	153	408	123	273	199	370	222	508	7.04423e-08	0.00126824	1.43826e-06
SMNDC1	895	840	1459	1026	704	685	655	696	672	606	1043	1064	7.04015e-08	0.00126751	1.43826e-06
C10orf35	413	418	169	220	404	517	396	424	452	344	609	675	7.25667e-08	0.00130649	1.4796e-06
SLC44A2	735	626	282	357	508	899	482	656	675	716	898	1143	7.27889e-08	0.00131049	1.48246e-06
TRANK1	0	27	20	38	0	33	0	11	0	22	1	26	7.34599e-08	0.00132257	1.49443e-06
DMKN	430	341	159	181	556	393	399	375	529	332	707	580	7.38175e-08	0.00132901	1.49935e-06
PROCR	1028	1656	2838	1974	1238	1972	1130	2096	1324	1552	1430	2422	7.38684e-08	0.00132993	1.49935e-06
CA12	404	316	237	66	407	227	399	276	397	232	436	365	7.56717e-08	0.00136239	1.53423e-06
ATP9A	1402	990	279	301	920	727	969	600	641	638	1460	1039	7.59035e-08	0.00136657	1.53707e-06
PDK2	399	469	165	205	301	637	277	441	295	416	524	727	7.59828e-08	0.00136799	1.53707e-06
FTSJD1	613	730	1271	865	595	1056	470	690	389	677	692	1058	7.66614e-08	0.00138021	1.54906e-06
EXPH5	723	324	114	47	538	447	572	252	318	269	468	402	7.7646e-08	0.00139794	1.56544e-06
PTP4A2	1974	1133	2929	1953	1771	1272	1558	1217	1635	1054	2623	1817	7.75749e-08	0.00139666	1.56544e-06
CNKSR3	367	206	138	100	286	292	262	211	336	276	394	296	7.77533e-08	0.00139987	1.56585e-06
CGB7	13	104	1	0	8	52	8	114	17	77	10	117	7.85559e-08	0.00141432	1.58025e-06
KIF14	717	287	1382	1124	539	915	574	525	382	557	967	806	7.8783e-08	0.00141841	1.58305e-06
FSTL3	483	969	151	356	387	671	338	783	449	714	685	1343	7.96357e-08	0.00143376	1.59662e-06
MYOF	3625	3875	240	672	2362	1545	3025	1864	1976	2023	4688	3926	7.95787e-08	0.00143274	1.59662e-06
CRABP2	2855	3130	950	1350	2869	4634	2247	4278	2863	2751	3184	4686	8.16506e-08	0.00147004	1.63519e-06
CDS2	1059	1011	1685	1299	643	978	843	886	626	942	1247	1469	8.52784e-08	0.00153535	1.70595e-06
ERICH1	173	132	257	208	135	105	86	109	138	111	163	131	8.71079e-08	0.00156829	1.74061e-06
FGGY	17	19	72	44	20	17	16	25	13	19	22	27	8.78271e-08	0.00158124	1.75304e-06
KIAA0196	1496	1069	2453	1254	993	965	1145	803	968	866	1834	1485	9.05529e-08	0.00163031	1.80544e-06
KIAA1524	968	501	1330	1368	723	1037	773	656	446	602	1114	911	9.14257e-08	0.00164603	1.82083e-06
SEC22C	528	373	838	586	392	434	403	398	358	353	577	596	9.34323e-08	0.00168216	1.85874e-06
PRKCG	83	56	9	13	41	45	53	56	35	31	87	68	9.41795e-08	0.00169561	1.86947e-06
PRRC2A	3523	3025	6099	4213	2889	3650	2610	3085	2828	2876	4428	4883	9.41581e-08	0.00169522	1.86947e-06
ARGLU1	1015	839	1413	1457	880	893	850	894	753	727	1318	1249	9.82603e-08	0.00176908	1.94832e-06
FOXN3	1072	754	216	198	598	622	618	478	442	524	935	946	1.01274e-07	0.00182333	2.00587e-06
TANK	215	273	351	425	174	247	245	207	171	210	264	327	1.02033e-07	0.00183701	2.01869e-06
VRK1	920	217	939	679	916	402	791	353	701	230	1158	390	1.04481e-07	0.00188107	2.06484e-06
E2F8	381	98	341	346	301	168	265	119	186	92	521	158	1.06077e-07	0.00190981	2.09409e-06
RAE1	808	693	1386	1128	734	789	686	748	785	669	1119	1054	1.06355e-07	0.00191482	2.09729e-06
THBS3	47	76	95	135	24	54	39	79	30	60	52	112	1.07341e-07	0.00193257	2.11441e-06
OAF	243	278	114	62	205	307	169	230	310	311	418	487	1.08699e-07	0.00195702	2.13882e-06
EFNA4	297	224	135	84	210	335	269	273	205	235	294	334	1.09114e-07	0.00196448	2.14463e-06
PNPO	701	1443	456	550	633	1684	635	1688	804	1696	902	2051	1.1036e-07	0.00198692	2.16677e-06
LMF1	109	239	75	38	118	209	91	183	107	188	159	295	1.11036e-07	0.00199909	2.17766e-06
CLIC2	1	16	23	41	4	19	4	3	2	12	6	14	1.15821e-07	0.00208524	2.26903e-06
APLP1	532	2034	348	757	443	2314	412	2324	542	1997	716	3407	1.17083e-07	0.00210796	2.29126e-06
C10orf32	140	499	109	202	263	625	173	528	185	474	276	872	1.18087e-07	0.00212603	2.3084e-06
KIFAP3	199	185	263	296	128	140	153	129	154	172	173	177	1.1938e-07	0.00214931	2.33114e-06
TRIP12	3722	2868	4763	3588	2533	2305	2782	1915	1779	2135	3848	3401	1.21533e-07	0.00218808	2.37061e-06
KCTD7	254	308	88	143	230	348	208	291	163	295	358	425	1.24887e-07	0.00224846	2.4334e-06
RNF24	223	268	374	387	133	298	188	253	116	247	234	421	1.25829e-07	0.00226542	2.44911e-06
ULBP2	611	1034	203	511	490	1441	290	909	528	1038	681	1501	1.26118e-07	0.00227064	2.45209e-06
SLC37A1	224	287	521	306	182	269	185	227	185	252	267	445	1.28546e-07	0.00231434	2.49659e-06
TNFRSF10A	223	484	506	617	246	507	176	448	216	448	325	681	1.29448e-07	0.00233059	2.51141e-06
OLA1	2307	1128	3073	1750	2077	841	1944	873	2164	938	3291	1363	1.29974e-07	0.00234006	2.5189e-06
LYRM1	218	158	356	314	212	181	173	192	207	188	213	217	1.30502e-07	0.00234956	2.52641e-06
SPHK1	823	1023	1909	1145	911	1000	653	1006	901	860	1101	1506	1.30844e-07	0.00235572	2.53031e-06
BNIP3L	1189	962	304	381	525	1025	832	871	564	966	991	1566	1.31442e-07	0.00236648	2.53914e-06
SP6	155	184	67	59	120	280	112	202	108	182	152	301	1.32975e-07	0.00239409	2.56601e-06
CCNG2	620	1027	169	254	250	1769	372	1323	224	1203	498	1767	1.36614e-07	0.0024596	2.63341e-06
MRPL13	1140	627	1775	1063	1145	638	1036	747	1065	539	1428	870	1.38217e-07	0.00248847	2.66146e-06
CCDC18	252	162	341	304	150	233	172	196	123	166	242	206	1.3907e-07	0.00250381	2.67315e-06
KLHDC7A	0	131	0	0	1	106	0	61	1	89	6	212	1.39122e-07	0.00250474	2.67315e-06
RAB3IP	656	454	1283	497	501	432	526	389	403	438	801	642	1.39787e-07	0.00251673	2.68308e-06
SIRT2	505	1491	376	420	445	1606	409	1547	499	1225	709	2102	1.40211e-07	0.00252436	2.68835e-06
WDHD1	1309	422	1282	1077	1023	702	928	560	659	482	1442	752	1.4626e-07	0.00263326	2.80134e-06
SIPA1L2	164	179	48	56	102	226	94	158	62	166	123	265	1.47492e-07	0.00265544	2.82193e-06
AASDH	113	102	228	138	70	123	66	77	48	126	114	167	1.50996e-07	0.00271854	2.88592e-06
CHRAC1	665	313	958	620	649	415	593	361	499	269	883	518	1.51599e-07	0.00272939	2.89437e-06
RRAS	53	71	72	192	42	63	47	59	43	85	72	107	1.60755e-07	0.00289422	3.06592e-06
TAGLN	390	1074	698	6202	611	1123	204	1044	822	1063	1593	3137	1.62851e-07	0.00293198	3.10262e-06
TMEM67	246	129	331	223	166	128	171	97	140	156	192	155	1.63052e-07	0.00293558	3.10315e-06
CAV1	1087	1000	92	207	881	950	1682	1149	1551	1677	1738	1266	1.63604e-07	0.00294553	3.10811e-06
STOX2	26	122	1	3	36	286	38	111	19	219	33	218	1.63657e-07	0.00294648	3.10811e-06
PARP10	21	138	47	253	10	109	4	40	10	67	13	117	1.67127e-07	0.00300895	3.17065e-06
DPY19L4	865	642	1330	933	583	647	711	631	496	702	1029	958	1.68231e-07	0.00302882	3.18823e-06
DIAPH3	1458	395	916	849	1124	362	951	283	948	278	1800	388	1.70215e-07	0.00306455	3.22245e-06
DPY19L1	774	470	1054	760	577	589	482	382	428	451	1035	718	1.7446e-07	0.00314097	3.29934e-06
STAG3	20	40	86	79	20	50	17	45	29	64	37	56	1.75704e-07	0.00316338	3.31939e-06
FKBP9	1116	716	422	315	669	732	729	569	750	718	1193	895	1.77037e-07	0.00318738	3.34107e-06
NUFIP1	183	106	326	196	167	139	124	84	172	103	221	181	1.77476e-07	0.00319528	3.34585e-06
CCDC92	24	33	2	2	7	40	14	30	12	24	23	60	1.79367e-07	0.00322933	3.37796e-06
BRF2	335	351	166	180	353	552	279	402	356	391	442	586	1.80835e-07	0.00325576	3.40204e-06
TPM3	6156	3562	8091	5815	4986	4294	4658	3477	4960	3112	7080	4822	1.83433e-07	0.00330252	3.44731e-06
RTN2	159	111	190	194	105	116	87	65	88	89	122	123	1.8679e-07	0.00336296	3.50673e-06
ATP6V1D	853	1352	1302	2149	752	1462	722	1280	721	1030	1341	2069	1.88079e-07	0.00338618	3.52727e-06
SIGIRR	147	129	373	182	138	167	126	169	173	107	188	176	1.89468e-07	0.00341118	3.54962e-06
TYSND1	326	531	214	148	278	665	261	457	240	425	512	792	1.91304e-07	0.00344423	3.58028e-06
DHRS11	191	145	268	317	140	170	145	197	146	134	244	232	1.93273e-07	0.00347969	3.61339e-06
ITGA6	1243	1240	587	451	958	1283	824	767	807	1232	1496	1681	1.96673e-07	0.0035409	3.67313e-06
GALR2	4	20	0	1	14	29	8	35	12	27	9	63	1.97261e-07	0.00355149	3.6803e-06
XRCC6	12349	5347	15995	8902	11250	5444	9476	4914	10967	4504	16669	7504	1.97586e-07	0.00355734	3.68254e-06
SAMD9L	18	31	43	94	7	56	9	12	5	12	8	31	2.00298e-07	0.00360617	3.72924e-06
ERBB3	1042	463	187	132	526	507	514	391	441	354	935	638	2.02808e-07	0.00365136	3.77207e-06
HIRA	634	411	1262	531	631	385	575	386	654	333	846	545	2.07458e-07	0.00373508	3.85457e-06
FBXO6	275	310	142	78	276	418	185	217	221	266	329	386	2.1106e-07	0.00379992	3.91745e-06
NPM2	90	108	176	188	92	116	66	96	96	90	99	141	2.11548e-07	0.00380871	3.92246e-06
COX6B2	30	32	2	3	24	46	28	23	10	28	21	32	2.15466e-07	0.00387924	3.99099e-06
STARD3NL	479	454	837	823	456	523	492	525	468	505	753	706	2.17865e-07	0.00392245	4.03129e-06
PCBP4	870	1919	472	771	744	1690	563	1893	874	1643	1187	2676	2.23175e-07	0.00401804	4.1253e-06
FBXO30	712	1081	1710	879	557	996	522	728	557	1176	951	1483	2.26249e-07	0.00407338	4.17783e-06
DSTN	2194	1694	3086	2803	1965	1997	1752	1595	1752	1478	3101	2474	2.26509e-07	0.00407807	4.17835e-06
CYP2E1	51	107	35	9	65	99	34	74	70	106	73	142	2.29147e-07	0.00412555	4.22268e-06
MX1	843	1349	450	684	789	1760	659	1317	959	1515	1165	2016	2.31549e-07	0.00416881	4.26259e-06
TGM1	22	91	14	16	30	147	30	104	23	82	42	164	2.33456e-07	0.00420315	4.29331e-06
SOGA1	103	243	129	419	45	216	47	209	75	283	99	313	2.36453e-07	0.0042571	4.34398e-06
GPX1	1998	3463	1490	1118	2048	5041	1738	3874	2254	3221	2787	4998	2.36762e-07	0.00426266	4.34522e-06
AVPI1	256	337	90	84	217	496	146	237	202	275	324	506	2.37177e-07	0.00427013	4.34841e-06
CENPB	873	607	1211	1123	804	752	714	627	838	571	1085	889	2.41914e-07	0.00435542	4.43074e-06
XRCC2	921	285	882	1185	651	600	629	435	317	407	898	563	2.42251e-07	0.00436149	4.43241e-06
C5orf43	1031	907	1656	1257	874	1062	737	783	710	937	1201	1308	2.4292e-07	0.00437354	4.44014e-06
VWA7	24	44	2	4	9	38	5	31	17	36	25	78	2.46609e-07	0.00443994	4.50299e-06
ATP5E	1782	1276	3143	2145	1772	1516	1675	1292	2245	1136	3089	1960	2.48499e-07	0.00447398	4.53291e-06
SMTN	472	1469	1846	653	466	1471	323	1594	508	1348	867	2496	2.49053e-07	0.00448394	4.5384e-06
LOC100996702	27	29	89	67	32	32	19	32	37	35	38	44	2.51803e-07	0.00453347	4.58389e-06
KIF5B	4753	4151	6870	5682	3780	4483	3720	3661	2641	3831	5447	5938	2.53704e-07	0.00456768	4.61382e-06
SEMA3B	44	88	4	4	23	73	10	45	23	45	21	93	2.54207e-07	0.00457675	4.61831e-06
C10orf25	13	34	59	88	14	47	12	61	11	45	42	58	2.57693e-07	0.0046395	4.67692e-06
C6orf48	1036	986	737	355	1169	1284	855	936	1142	865	1475	1332	2.57976e-07	0.00464461	4.67735e-06
SLC25A15	1010	883	578	331	988	1131	733	855	705	805	1166	1276	2.60596e-07	0.00469178	4.7201e-06
ABCA7	305	889	92	284	382	875	215	1125	254	739	311	1324	2.68024e-07	0.0048255	4.84002e-06
NUMB	857	628	1144	855	554	535	586	536	504	520	888	893	2.6791e-07	0.00482345	4.84002e-06
TCF7	716	402	292	201	637	444	575	451	577	322	826	597	2.6765e-07	0.00481878	4.84002e-06
POLR3G	654	213	1073	341	719	155	634	199	459	173	958	260	2.71082e-07	0.00488057	4.8885e-06
TSPAN33	857	859	486	356	771	1061	624	1047	759	730	1131	1201	2.71252e-07	0.00488361	4.8885e-06
ZNF385A	222	477	142	137	157	503	186	468	206	469	291	737	2.72227e-07	0.00490118	4.90118e-06
GNG5	921	595	1410	1012	912	578	754	564	1018	487	1437	934	2.74686e-07	0.00494545	4.94051e-06
LLGL1	1113	1123	613	419	851	1152	812	1114	866	974	1340	1666	2.81416e-07	0.00506661	5.0565e-06
PSKH1	224	309	144	131	213	385	212	341	284	342	439	576	2.88809e-07	0.00519971	5.18416e-06
BTN3A2	468	320	294	43	649	395	703	436	463	347	780	504	2.89262e-07	0.00520787	5.18712e-06
PMVK	149	172	372	226	176	216	119	156	167	184	165	228	2.8968e-07	0.0052154	5.18945e-06
LRRC42	762	506	831	1023	645	555	577	522	560	377	1064	814	2.91811e-07	0.00525377	5.22243e-06
CDC27	2308	1282	3168	1724	1767	1303	1837	1016	1255	1163	2457	1591	2.95133e-07	0.00531358	5.27664e-06
TTYH2	568	701	274	296	519	679	427	564	633	567	729	918	2.99987e-07	0.00540097	5.3581e-06
CDC45	949	237	838	882	768	540	688	441	841	322	1226	517	3.01683e-07	0.00543149	5.3779e-06
PFAS	1794	641	2418	1043	1895	660	1546	533	1600	531	2206	747	3.01693e-07	0.00543168	5.3779e-06
ACAA2	871	635	1081	1161	556	791	588	602	650	613	1093	1135	3.02242e-07	0.00544156	5.38236e-06
ERMAP	46	93	110	140	24	81	40	77	45	100	55	111	3.14254e-07	0.00565783	5.59074e-06
ADNP	2468	1639	3862	1805	1781	1631	1682	1406	1364	1362	2347	2303	3.16743e-07	0.00570263	5.62945e-06
LMNA	1430	2645	1051	1092	1309	3236	1098	3021	1721	2735	2498	4297	3.26653e-07	0.00588107	5.79987e-06
PKP3	1164	858	190	278	677	551	1041	809	1250	594	1475	1164	3.29283e-07	0.0059284	5.84079e-06
RAB3A	92	75	11	14	66	88	30	51	86	57	85	85	3.32237e-07	0.00598159	5.8874e-06
FAM161A	289	128	346	288	209	164	221	156	180	133	281	197	3.32569e-07	0.00598757	5.88748e-06
EPHB2	661	499	353	170	486	490	454	363	640	449	828	659	3.35664e-07	0.00604329	5.93643e-06
NDUFA6	738	488	1199	887	699	709	600	571	719	521	1029	733	3.36443e-07	0.00605731	5.94437e-06
NUDCD1	2220	1139	2228	2212	2093	1237	1510	1037	1483	1001	2840	1626	3.38041e-07	0.00608608	5.96675e-06
KCTD14	0	0	9	12	0	1	0	0	0	0	1	1	3.46115e-07	0.00623146	6.10329e-06
DYNC1I1	20	41	2	1	5	35	9	17	15	30	20	44	3.514e-07	0.0063266	6.19041e-06
HDAC5	589	605	287	242	418	639	399	614	459	536	713	937	3.57687e-07	0.00643979	6.29501e-06
MST1R	983	1211	414	646	926	1244	1126	1477	1003	1043	1422	1672	3.59278e-07	0.00646843	6.31683e-06
SLMO2	2229	1587	3508	2173	1966	1754	1752	1496	1523	1392	2846	2214	3.65354e-07	0.00657784	6.4174e-06
ATR	766	681	1136	902	621	731	565	496	421	640	826	941	3.73413e-07	0.00672293	6.55257e-06
TPD52	2068	973	2715	1562	1739	889	1719	863	1546	814	3069	1367	3.73979e-07	0.00673312	6.5561e-06
LYSMD1	184	131	63	55	120	182	133	152	128	155	184	211	3.79055e-07	0.00682451	6.63863e-06
XPNPEP3	653	519	995	697	507	514	479	415	435	464	791	682	3.87934e-07	0.00698436	6.78752e-06
ANO2	0	67	0	0	0	40	0	44	0	62	0	103	3.93218e-07	0.0070795	6.8733e-06
RANGAP1	3558	2864	4846	4515	3652	2959	2670	2622	3381	2063	4552	4068	3.95194e-07	0.00711508	6.90114e-06
ADSL	1555	877	2297	1358	1304	730	1385	886	1585	770	2063	1178	4.01218e-07	0.00722352	6.99954e-06
CCS	195	564	131	175	148	637	147	681	192	552	277	816	4.03599e-07	0.0072664	7.03427e-06
GMPS	2483	852	2726	1657	2081	941	1929	915	1916	793	3093	1205	4.04405e-07	0.00728091	7.0415e-06
PTH1R	10	5	35	38	6	8	14	17	12	11	7	8	4.05668e-07	0.00730365	7.05667e-06
MARVELD2	201	320	59	92	163	338	148	370	153	463	206	446	4.10721e-07	0.00739461	7.13766e-06
CEACAM19	94	153	52	52	126	170	97	185	106	136	146	244	4.14543e-07	0.00746344	7.19714e-06
ENSA	2190	1606	3432	2441	1830	1708	1807	1723	1907	1311	3132	2622	4.15974e-07	0.0074892	7.21503e-06
ATG4D	403	380	184	174	325	477	306	394	352	337	522	596	4.20028e-07	0.00756218	7.27832e-06
NADK	1674	1484	1043	608	1518	1384	1434	1750	1634	1309	2224	2221	4.24731e-07	0.00764685	7.35274e-06
HRAS	433	494	332	167	445	693	367	598	515	477	621	779	4.28223e-07	0.00770973	7.40608e-06
GMEB2	321	275	522	426	252	238	254	280	294	258	391	408	4.29106e-07	0.00772562	7.41422e-06
PINX1	95	67	198	131	129	62	92	62	102	51	138	98	4.34956e-07	0.00783095	7.50811e-06
CASZ1	264	348	31	94	190	311	160	306	87	169	306	421	4.36455e-07	0.00785793	7.51323e-06
NDC80	591	212	718	677	402	513	462	421	410	306	679	449	4.3618e-07	0.00785299	7.51323e-06
TRPC4AP	1612	1380	2631	1845	1408	1167	1373	1323	1579	1140	2030	1804	4.36505e-07	0.00785884	7.51323e-06
PLEC	3186	4221	5799	4516	2490	3702	2724	3656	2603	3566	3908	5311	4.37972e-07	0.00788524	7.53127e-06
NEIL3	163	63	336	257	147	212	155	155	124	109	195	132	4.39284e-07	0.00790887	7.54663e-06
DHDH	25	27	6	2	16	50	21	26	30	39	32	40	4.39768e-07	0.00791758	7.54774e-06
BTBD11	104	90	35	15	66	85	72	74	58	74	89	104	4.41629e-07	0.00795109	7.57247e-06
GRINA	1794	2343	2987	3257	1419	2417	1417	2357	2018	1939	2348	3308	4.50306e-07	0.00810732	7.71391e-06
TBL1XR1	2590	1180	3214	1473	1870	959	1761	824	1346	836	2869	1464	4.50747e-07	0.00811525	7.71412e-06
EXTL2	486	293	885	525	455	472	451	390	358	327	671	543	4.52341e-07	0.00814395	7.73403e-06
RPS6KA2	75	41	21	3	53	53	43	21	50	36	77	41	4.5277e-07	0.00815167	7.73403e-06
LONRF1	207	83	313	137	117	72	128	79	144	91	200	112	4.59334e-07	0.00826985	7.83872e-06
VPS37A	307	338	464	509	196	346	226	301	195	322	385	547	4.60142e-07	0.0082844	7.83955e-06
ZNF491	53	124	22	24	27	157	33	138	30	131	58	187	4.60254e-07	0.00828641	7.83955e-06
UGP2	560	445	800	705	405	499	432	438	414	434	669	604	4.65262e-07	0.00837658	7.91738e-06
CTNND1	2532	2751	3077	3911	1676	2618	1862	2800	1302	2239	2576	3682	4.66519e-07	0.00839921	7.93127e-06
CAMKK1	273	249	132	80	282	178	253	146	269	207	361	281	4.73493e-07	0.00852476	8.04223e-06
DUSP14	751	1755	561	580	777	1586	586	1571	775	1414	1319	2594	4.94213e-07	0.00889782	8.38626e-06
TOMM22	1475	752	2391	1238	1694	908	1245	711	1646	701	2017	1057	5.11091e-07	0.00920169	8.66449e-06
SEL1L3	1546	1350	488	637	1521	1193	981	799	1351	1109	2056	1768	5.16674e-07	0.00930219	8.75089e-06
PIBF1	187	98	255	179	134	96	155	67	113	77	211	145	5.2453e-07	0.00944364	8.8756e-06
SLC19A1	645	303	432	75	601	280	489	298	635	222	813	351	5.39545e-07	0.00971397	9.1211e-06
TRMT2B	221	148	337	265	181	242	159	146	128	142	216	227	5.41985e-07	0.0097579	9.15375e-06
CERK	1235	951	626	455	1018	1046	1080	953	921	883	1765	1464	5.49332e-07	0.00989018	9.26537e-06
CLEC18B	13	24	0	0	4	21	2	16	15	26	8	19	5.49623e-07	0.00989542	9.26537e-06
AKR1B10	1	332	0	0	3	288	4	561	6	560	4	403	5.58191e-07	0.0100497	9.40101e-06
PPID	1522	862	767	423	1492	829	1244	900	1454	702	2251	1221	5.63104e-07	0.0101381	9.47487e-06
C17orf85	1186	843	543	369	858	954	885	843	623	794	1226	1315	5.64582e-07	0.0101647	9.49088e-06
ATP13A1	865	1166	552	528	864	1269	766	1341	988	1030	1266	1957	5.65439e-07	0.0101802	9.49642e-06
GSTK1	436	633	857	830	315	555	456	655	481	583	661	820	5.75892e-07	0.0103684	9.66296e-06
LPHN1	1762	1098	765	460	1236	949	1263	897	1370	753	1901	1452	5.77479e-07	0.0103969	9.68057e-06
COBL	522	432	188	140	376	320	436	254	362	234	727	551	5.80679e-07	0.0104545	9.71611e-06
IL7	37	51	93	68	22	76	10	27	10	50	24	53	5.80558e-07	0.0104524	9.71611e-06
MTHFD2L	24	30	88	33	18	15	22	20	18	13	33	15	5.84733e-07	0.0105275	9.77487e-06
CTSD	2501	4581	1458	1704	2246	5100	1827	3234	2662	3496	3244	6148	5.93212e-07	0.0106802	9.90741e-06
PI4K2A	728	989	1060	1516	598	1063	590	974	549	871	870	1565	5.95986e-07	0.0107301	9.94451e-06
PLXNA2	239	251	78	54	183	243	98	171	118	212	179	302	6.03658e-07	0.0108683	1.00632e-05
KIF13B	353	340	391	503	188	269	254	284	164	264	326	413	6.07341e-07	0.0109346	1.01152e-05
AK7	3	3	38	12	2	6	2	4	4	3	4	12	6.12041e-07	0.0110192	1.01841e-05
CROCC	323	305	197	95	341	307	275	291	306	262	401	388	6.12965e-07	0.0110358	1.01901e-05
ECHDC2	46	55	109	88	25	61	28	54	39	72	43	64	6.16674e-07	0.0111026	1.02423e-05
PHF1	617	697	299	300	354	983	372	748	411	652	776	1201	6.23372e-07	0.0112232	1.0344e-05
MYO9B	1374	1368	2438	1435	999	1214	1065	1190	1023	1217	1521	1818	6.32408e-07	0.0113859	1.04842e-05
KCNJ11	160	92	66	24	130	75	125	104	112	66	198	143	6.34873e-07	0.0114303	1.05154e-05
LENG8	1024	1313	1165	2066	693	922	852	1201	796	1026	1207	1849	6.68199e-07	0.0120302	1.10572e-05
MIS18BP1	836	463	1127	892	667	752	717	504	445	489	1098	834	6.70135e-07	0.0120651	1.10791e-05
MIER1	738	725	1387	738	560	739	593	645	402	615	867	1069	6.71039e-07	0.0120814	1.10838e-05
SLC5A2	10	24	2	1	17	22	7	29	14	34	18	50	6.76327e-07	0.0121766	1.11609e-05
ILK	1007	1172	1845	1824	971	1486	844	1322	1063	1098	1596	2046	6.79229e-07	0.0122288	1.11986e-05
PLCB4	172	167	94	45	150	119	174	121	155	155	262	245	6.87498e-07	0.0123777	1.13245e-05
CENPN	1001	399	1107	1073	790	813	793	570	771	443	1371	816	6.94228e-07	0.0124989	1.14249e-05
KRTAP4-8	0	0	6	8	0	0	0	0	0	0	0	0	7.03487e-07	0.0126656	1.15667e-05
PIK3R3	421	819	260	226	277	906	443	875	232	686	473	1053	7.15564e-07	0.012883	1.17546e-05
ACOT2	174	204	333	298	143	253	122	177	163	231	216	273	7.1879e-07	0.0129411	1.17968e-05
C17orf100	15	8	28	34	4	12	5	11	1	10	4	9	7.21191e-07	0.0129843	1.18254e-05
SLC46A3	761	554	17	16	286	249	840	453	199	205	976	684	7.22139e-07	0.0130014	1.18302e-05
CTNS	365	698	254	210	349	807	314	567	373	517	464	939	7.5171e-07	0.0135338	1.23034e-05
ARL6IP6	315	92	262	303	186	169	216	127	144	97	345	170	7.53017e-07	0.0135573	1.23136e-05
PRRT3	83	94	29	27	76	98	69	57	82	104	112	105	7.64317e-07	0.0137608	1.24871e-05
KRR1	2249	1998	4585	1851	2000	2180	2088	1556	1242	1609	2904	2732	7.65239e-07	0.0137774	1.24908e-05
GTF2H2	467	287	599	385	352	216	282	213	297	239	442	320	7.66129e-07	0.0137934	1.2494e-05
TRIM56	452	578	771	671	287	722	376	486	207	555	500	830	7.67572e-07	0.0138194	1.25062e-05
ADK	407	192	717	205	288	124	339	97	355	125	594	202	7.83947e-07	0.0141142	1.27615e-05
ST13	6683	5814	10353	7271	5479	5847	5032	4840	4968	4340	9355	8286	7.89413e-07	0.0142126	1.28388e-05
PGK1	7573	4790	9862	7202	6020	4990	6056	4237	6121	3596	10020	6860	8.18636e-07	0.0147387	1.33021e-05
MGAT5B	35	62	1	2	15	37	10	24	25	40	33	98	8.34134e-07	0.0150177	1.35417e-05
TWF1	1872	1809	3672	2055	1688	2063	1666	1677	1307	1693	2622	2740	8.43636e-07	0.0151888	1.36836e-05
WIPF1	0	2	4	25	0	6	0	1	0	2	0	2	8.48094e-07	0.0152691	1.37436e-05
FGFR2	244	186	111	44	158	210	129	177	131	170	239	227	8.49354e-07	0.0152918	1.37516e-05
DGKA	524	1630	374	532	473	1629	413	1851	443	1636	614	2480	8.51545e-07	0.0153312	1.37747e-05
DAPK2	87	36	11	13	36	41	58	44	56	32	82	53	8.57666e-07	0.0154414	1.38612e-05
RRM2B	1307	7902	1394	1239	1384	8361	1194	7476	857	7396	1862	12915	8.63457e-07	0.0155457	1.39423e-05
NFATC4	56	58	3	4	21	69	36	114	40	85	32	72	8.66707e-07	0.0156042	1.39823e-05
MAN1C1	22	31	2	0	9	26	3	21	9	21	32	26	8.69437e-07	0.0156533	1.40137e-05
MCOLN1	282	399	124	146	238	645	307	538	427	436	444	664	8.7568e-07	0.0157657	1.41017e-05
PTP4A3	17	37	4	2	8	41	11	31	24	46	15	56	8.8877e-07	0.0160014	1.42997e-05
PRMT10	352	419	174	143	233	452	232	353	203	472	383	635	8.92451e-07	0.0160677	1.43461e-05
KANK3	32	88	18	15	29	104	26	112	37	120	40	129	8.95009e-07	0.0161137	1.43744e-05
EPHA1	46	7	1	2	21	6	42	12	29	12	68	28	9.07472e-07	0.0163381	1.45486e-05
RNF166	255	198	136	60	160	267	188	238	182	216	273	317	9.07057e-07	0.0163306	1.45486e-05
GLT25D2	137	108	34	18	94	98	50	61	89	97	168	109	9.0886e-07	0.0163631	1.45579e-05
ZC2HC1C	10	14	27	51	4	19	8	17	6	16	11	17	9.12455e-07	0.0164278	1.46025e-05
STAT6	1049	1747	2323	1903	905	1556	1039	1884	1083	1750	1475	2462	9.14754e-07	0.0164692	1.46263e-05
FUCA2	1643	1204	2644	1796	1389	1481	1261	1082	1567	1289	2153	1881	9.19152e-07	0.0165484	1.46836e-05
TMEM132A	891	934	399	433	490	988	689	986	686	803	1021	1350	9.24416e-07	0.0166432	1.47546e-05
CHRNA7	280	399	141	79	171	520	154	324	105	348	241	582	9.27764e-07	0.0167035	1.47949e-05
ANO8	203	323	76	105	86	269	147	282	126	252	185	441	9.31307e-07	0.0167672	1.48383e-05
OSR2	173	222	94	65	144	345	126	210	118	213	189	319	9.45045e-07	0.0170146	1.50438e-05
NR4A1	315	860	94	184	217	1213	178	921	223	576	270	1228	9.82587e-07	0.0176905	1.56277e-05
DNAH10	33	99	16	9	17	144	26	90	17	101	50	213	1.02696e-06	0.0184894	1.6319e-05
DYRK3	183	777	502	688	164	794	185	667	128	862	275	1233	1.03665e-06	0.0186639	1.64584e-05
FAM123B	429	520	284	117	296	710	323	464	194	477	481	782	1.04638e-06	0.018839	1.65982e-05
AZIN1	4008	2730	6009	3815	3324	3781	2668	2415	2444	2602	5196	4474	1.0595e-06	0.0190752	1.67768e-05
IFI35	48	50	93	88	9	63	10	20	30	38	9	47	1.05882e-06	0.019063	1.67768e-05
CRIPAK	157	226	85	67	135	201	119	183	138	179	225	408	1.08541e-06	0.0195417	1.7172e-05
SPSB3	298	422	196	139	267	428	231	410	287	422	419	676	1.08682e-06	0.0195671	1.71791e-05
ABRACL	483	541	951	787	507	708	478	456	520	478	778	858	1.08789e-06	0.0195864	1.7181e-05
IL3RA (NC_000023 1455008..1502082)	3	54	2	1	1	51	2	58	2	57	2	86	1.09035e-06	0.0196306	1.72048e-05
ETNK2	75	67	8	29	51	79	43	65	55	56	65	107	1.09578e-06	0.0197285	1.72754e-05
KLHDC2	425	402	299	120	316	516	343	511	300	424	562	788	1.10153e-06	0.019832	1.73509e-05
GPRC5C	4	2	8	27	1	10	0	2	0	1	0	1	1.1182e-06	0.0201321	1.75895e-05
SLC16A8	15	40	0	1	7	20	16	25	16	51	15	46	1.11864e-06	0.02014	1.75895e-05
CTNNB1	5090	4643	7302	6283	4150	5163	3982	4380	3638	4006	5555	6441	1.13984e-06	0.0205217	1.78761e-05
MFHAS1	354	255	445	444	256	342	269	206	169	244	406	397	1.13845e-06	0.0204966	1.78761e-05
RAB3IL1	148	140	71	33	106	172	91	120	128	124	150	183	1.13942e-06	0.0205141	1.78761e-05
HPRT1	1106	588	1403	1137	1117	637	890	630	1086	559	1693	882	1.14413e-06	0.0205989	1.79277e-05
DDX3X	6664	4791	9703	5678	5104	4806	5161	3748	3582	3859	8043	6550	1.15164e-06	0.0207342	1.80297e-05
GM2A	490	1224	400	177	408	1652	347	1012	357	992	730	1740	1.15882e-06	0.0208635	1.81106e-05
HDGF	4386	2157	5538	4034	4066	2754	3453	2177	4556	2063	6334	3230	1.15814e-06	0.0208511	1.81106e-05
RND2	140	95	11	21	130	79	79	53	74	32	148	74	1.17636e-06	0.0211791	1.83687e-05
HS6ST1	836	737	541	315	731	990	718	795	819	738	1125	1195	1.18175e-06	0.0212763	1.8437e-05
CPEB2	152	349	72	34	82	339	68	228	45	285	127	503	1.19167e-06	0.0214549	1.85756e-05
TRPS1	183	106	273	149	104	110	115	52	81	111	164	156	1.19312e-06	0.021481	1.85821e-05
SHC1	2830	4479	5167	5079	2341	4551	2070	4572	2571	4010	3788	5799	1.20389e-06	0.0216749	1.87337e-05
CDC42BPA	1217	951	1740	1117	882	866	840	682	658	855	1429	1185	1.20501e-06	0.0216949	1.87348e-05
TMCC2	143	239	59	89	87	224	127	237	122	175	195	351	1.20791e-06	0.0217471	1.87637e-05
ZNF512	548	584	662	999	505	572	430	572	407	458	739	784	1.22801e-06	0.0221091	1.90596e-05
GAS7	1	26	0	0	0	30	1	34	1	30	2	44	1.23157e-06	0.0221731	1.90983e-05
USP12	1006	691	1239	1029	789	704	668	619	487	630	1126	1015	1.23953e-06	0.0223166	1.92053e-05
MUC12	25	103	100	109	20	106	19	105	21	105	39	181	1.24806e-06	0.0224702	1.93209e-05
NRBP1	2428	1819	1197	845	1789	1850	1827	1531	1942	1504	2928	2928	1.26899e-06	0.0228469	1.96279e-05
TM9SF4	1008	784	1390	1127	765	625	736	697	889	762	1208	1064	1.28069e-06	0.0230575	1.97919e-05
DNAJB11	1500	1061	652	594	1269	1099	1593	1264	1636	1138	2441	1451	1.28846e-06	0.0231975	1.98949e-05
ADD3	817	572	210	280	505	689	719	507	406	522	1044	775	1.29464e-06	0.0233088	1.99732e-05
RRM1	4307	2132	4779	4837	3684	3694	3127	2576	3385	2525	5515	3920	1.30866e-06	0.0235612	2.01723e-05
HOXC10	118	147	57	55	97	203	83	134	112	135	210	273	1.35166e-06	0.0243353	2.08172e-05
GTF3C1	2455	2239	3200	3031	1975	1843	1969	1878	1894	1803	2793	2799	1.37868e-06	0.0248218	2.12152e-05
MNS1	10	10	55	28	15	12	13	15	9	11	21	9	1.38119e-06	0.0248669	2.12356e-05
SNRPB2	1109	813	1966	1153	1113	848	930	863	1202	713	1624	1172	1.38607e-06	0.0249547	2.12924e-05
CCDC167	182	50	69	20	181	56	158	45	159	54	248	84	1.38783e-06	0.0249865	2.13014e-05
ARFGEF2	1444	1696	2211	1821	1036	1660	992	1231	533	1634	1509	2242	1.44067e-06	0.0259379	2.20936e-05
MYCL1	163	87	54	22	98	133	77	121	77	84	141	136	1.44578e-06	0.0260298	2.2153e-05
CLDN3	20	18	1	2	20	22	16	20	17	26	18	19	1.47374e-06	0.0265332	2.25622e-05
SP100	474	1355	1088	1376	418	1487	438	1526	422	1246	640	1933	1.5256e-06	0.0274669	2.33364e-05
SEPT10	1321	802	1417	1397	1158	865	1070	712	723	578	1846	1171	1.54113e-06	0.0277466	2.3554e-05
TPD52L1	372	202	123	104	327	176	303	170	325	164	499	262	1.55192e-06	0.0279407	2.36986e-05
STARD10	462	756	251	357	395	965	365	694	513	704	589	1146	1.55527e-06	0.028001	2.37297e-05
SNAI3	19	45	1	3	10	40	13	53	21	62	18	39	1.571e-06	0.0282842	2.39494e-05
EML4	1583	915	1897	1242	1166	770	1267	734	846	740	1717	1101	1.57928e-06	0.0284333	2.40409e-05
ESYT2	1364	1630	786	600	930	1833	931	1268	840	1624	1699	2540	1.57967e-06	0.0284404	2.40409e-05
SLC25A4	963	1466	609	754	1161	2081	859	1459	971	1309	1554	2328	1.60521e-06	0.0289001	2.44089e-05
MAPK11	264	378	345	570	152	296	199	377	215	290	309	519	1.63203e-06	0.029383	2.47958e-05
SAMHD1	534	423	675	695	484	433	491	391	330	318	720	551	1.63806e-06	0.0294916	2.48664e-05
SERPINA1	0	5	20	22	0	1	0	2	0	5	0	29	1.66893e-06	0.0300474	2.53137e-05
JPH1	1068	426	203	251	863	371	740	297	604	343	1019	454	1.68242e-06	0.0302903	2.54969e-05
LCLAT1	503	198	676	375	381	228	407	227	400	208	615	324	1.74661e-06	0.0314459	2.64474e-05
POLD1	1160	430	1365	1111	1109	723	1049	636	1290	484	1571	805	1.76417e-06	0.0317622	2.66909e-05
UNKL	511	514	222	310	547	648	426	549	398	474	834	841	1.76609e-06	0.0317967	2.66975e-05
MXI1	575	695	341	195	476	585	412	590	395	537	549	833	1.79849e-06	0.03238	2.71644e-05
HK2	2015	788	2554	1152	1890	590	1720	763	1289	736	2159	927	1.82093e-06	0.0327839	2.74803e-05
LPAR2	210	175	82	74	141	144	177	159	215	166	256	253	1.84193e-06	0.0331621	2.77739e-05
ZNF800	718	726	1034	848	451	819	466	627	297	613	769	1091	1.87121e-06	0.0336893	2.81918e-05
C20orf72	486	804	1182	1606	659	1457	576	1207	566	1004	713	1579	1.87322e-06	0.0337255	2.81986e-05
SCAND1	228	236	488	337	200	381	179	241	259	225	310	392	1.8814e-06	0.0338727	2.8298e-05
MBD5	22	24	65	45	6	36	13	27	17	37	14	44	1.89231e-06	0.0340691	2.84383e-05
RBM3	3368	1536	4356	2281	3124	1560	2666	1119	3368	1346	4112	1796	1.89803e-06	0.0341722	2.85005e-05
MMP10	0	2	7	15	0	0	0	0	0	3	0	3	1.90377e-06	0.0342754	2.85628e-05
SLC25A30	314	439	166	148	294	711	303	435	209	449	405	620	1.91676e-06	0.0345094	2.87339e-05
CSDA	2268	4233	1588	1856	2861	4109	2025	4326	2406	3448	3236	6359	1.92233e-06	0.0346096	2.87933e-05
ABHD12	697	526	1039	882	611	619	577	577	671	509	905	836	1.93609e-06	0.0348573	2.89753e-05
RAB3GAP2	953	941	1303	1277	458	644	655	656	447	920	960	1137	1.97141e-06	0.0354933	2.94795e-05
PAICS	9062	2946	7955	6226	8659	3466	7290	3037	7090	2799	11871	3925	1.99493e-06	0.0359166	2.98063e-05
CRNKL1	654	515	1048	695	562	592	534	511	463	462	762	711	2.02248e-06	0.0364127	3.01929e-05
DAXX	1446	1024	1737	1957	1261	1321	1116	1129	1368	970	1861	1606	2.03011e-06	0.0365501	3.02817e-05
FRRS1	210	142	76	62	133	227	126	159	104	165	270	304	2.06406e-06	0.0371614	3.07627e-05
PRKAB1	276	567	195	200	241	793	214	514	285	588	383	882	2.06829e-06	0.0372375	3.08003e-05
KIAA1324L	79	116	28	28	33	159	45	117	53	159	94	160	2.07303e-06	0.0373229	3.08454e-05
BLM	779	270	782	759	711	543	647	414	547	335	970	443	2.09721e-06	0.0377583	3.11572e-05
SOX8	476	351	263	126	517	537	481	419	563	319	578	495	2.09745e-06	0.0377625	3.11572e-05
PLIN5	21	96	1	11	11	63	20	79	25	67	10	72	2.10784e-06	0.0379495	3.12856e-05
IPO11	1370	515	1501	831	1199	458	986	396	872	442	1675	697	2.14442e-06	0.0386081	3.18024e-05
TNK1	339	288	222	104	292	484	266	338	309	296	426	423	2.20836e-06	0.0397593	3.27237e-05
AHNAK	14223	16552	25406	16510	7329	12183	8388	8741	3822	13065	11688	18629	2.21847e-06	0.0399414	3.28465e-05
SLCO1B3	129	286	1	53	84	129	76	131	146	197	227	321	2.27371e-06	0.040936	3.36368e-05
PPM1J	160	209	273	272	112	167	108	211	126	174	175	296	2.29073e-06	0.0412423	3.38606e-05
CASP4	555	960	1614	2246	1145	1368	594	997	1069	1044	1007	1846	2.30749e-06	0.041544	3.40804e-05
C20orf24	980	740	1378	1470	993	959	795	878	1143	764	1386	1376	2.34531e-06	0.042225	3.46106e-05
PRCP	703	812	1042	1333	530	987	615	769	599	782	1077	1466	2.35566e-06	0.0424113	3.47349e-05
GPX3	2	7	5	34	0	4	0	2	1	4	1	7	2.35849e-06	0.0424623	3.47482e-05
EFHC1	104	77	177	151	91	93	99	71	74	72	164	107	2.37498e-06	0.0427591	3.49625e-05
PIK3CA	473	519	692	608	234	648	321	472	160	522	481	818	2.37763e-06	0.0428068	3.49729e-05
DNAJC12	47	69	360	271	66	111	121	217	57	62	115	139	2.44998e-06	0.0441094	3.60077e-05
LCE1F	0	192	55	34	0	78	0	45	1	98	0	174	2.46468e-06	0.044374	3.61942e-05
ARHGAP40	49	58	83	104	38	65	22	47	41	52	33	68	2.46684e-06	0.044413	3.61964e-05
ENPP5	45	32	2	3	27	43	20	13	12	22	54	54	2.48504e-06	0.0447407	3.64338e-05
RAD54B	1080	244	1039	748	750	472	736	339	488	279	1174	556	2.51887e-06	0.0453498	3.68998e-05
STARD5	43	129	12	8	33	238	49	144	30	145	59	139	2.53524e-06	0.0456444	3.71093e-05
PARP1	4768	2046	4975	4476	4590	2730	3968	2457	4212	2062	6454	3415	2.55522e-06	0.0460042	3.73714e-05
SYNPO	12	50	30	115	4	60	7	38	20	55	15	93	2.58812e-06	0.0465965	3.78218e-05
NCAPH2	1060	656	1641	1167	1051	988	774	749	1097	687	1529	1112	2.61201e-06	0.0470266	3.814e-05
KIAA1967	1289	985	2522	1185	1213	1200	1071	1064	1253	922	1619	1474	2.63065e-06	0.0473622	3.8381e-05
NAAA	525	377	247	168	525	466	417	295	442	338	573	387	2.67569e-06	0.0481731	3.90065e-05
KIFC3	1497	1122	921	460	1445	998	1331	921	1324	780	2261	1716	2.68727e-06	0.0483815	3.9112e-05
YPEL2	262	340	64	84	104	290	128	324	73	260	189	426	2.68589e-06	0.0483568	3.9112e-05
FN3K	288	314	177	118	238	421	230	363	336	272	389	453	2.70375e-06	0.0486784	3.93202e-05
POLE	2419	1070	2100	2338	1982	1695	1558	1214	1384	897	2725	1801	2.79362e-06	0.0502964	4.05943e-05
XKR8	286	208	166	90	237	306	272	262	272	205	378	341	2.80923e-06	0.0505774	4.07882e-05
NLK	127	183	202	305	133	222	92	171	81	142	177	280	2.81945e-06	0.0507614	4.09037e-05
MICALL1	896	1674	1597	1871	823	1661	644	1508	778	1553	980	2423	2.84249e-06	0.0511762	4.12047e-05
PLAUR	216	312	1302	592	163	208	128	176	570	300	353	361	2.8857e-06	0.0519542	4.17974e-05
DDAH2	370	344	325	623	142	419	211	309	223	281	340	490	2.90308e-06	0.052267	4.20153e-05
ABCG2	65	104	21	47	71	98	76	92	61	128	109	173	2.9175e-06	0.0525266	4.21901e-05
FAM116B	17	69	6	8	9	55	15	58	15	70	25	84	2.97147e-06	0.0534984	4.29361e-05
LARS	3531	2017	4162	2808	3098	1603	2773	1747	2360	1600	3641	2549	2.97531e-06	0.0535676	4.29571e-05
ABTB2	312	518	210	159	284	471	237	463	288	495	369	736	2.98598e-06	0.0537596	4.30766e-05
MCTP1	276	441	958	595	423	453	251	327	169	371	694	749	3.00536e-06	0.0541085	4.33215e-05
ARVCF	404	851	199	407	347	743	382	805	333	786	511	1273	3.04607e-06	0.0548415	4.38732e-05
CUL5	863	668	1147	762	542	678	598	486	377	552	863	828	3.07214e-06	0.0553108	4.42133e-05
CENPQ	196	75	236	277	162	207	150	161	144	118	235	184	3.08078e-06	0.0554663	4.42894e-05
CHD1	2008	1377	2665	1770	1565	1325	1566	1012	964	1316	2321	1944	3.08235e-06	0.0554946	4.42894e-05
ACADM	690	642	882	921	536	689	516	442	431	527	925	886	3.12213e-06	0.0562109	4.48253e-05
TOPBP1	2329	1038	2600	2054	1816	1608	1871	1186	1366	1101	2853	1776	3.16884e-06	0.0570518	4.54596e-05
RPA2	901	480	1401	1052	952	878	883	725	981	564	1310	875	3.17432e-06	0.0571504	4.55019e-05
NAT1	10	43	91	109	18	79	23	48	30	70	10	25	3.28922e-06	0.0592192	4.71115e-05
NFATC1	236	209	95	96	208	238	170	254	152	194	239	311	3.31876e-06	0.059751	4.74968e-05
NRM	266	36	334	140	160	87	197	62	255	61	310	88	3.32899e-06	0.0599351	4.76053e-05
MTERFD1	590	290	873	497	604	337	482	295	504	297	830	435	3.34131e-06	0.0601569	4.77435e-05
ATP6V0A4	3	87	0	1	11	145	1	42	11	91	6	109	3.36899e-06	0.0606554	4.8101e-05
TUBAL3	0	2	9	14	0	2	0	2	0	1	0	6	3.40621e-06	0.0613255	4.85939e-05
PHF5A	866	389	1331	752	986	551	835	469	873	390	1394	637	3.46455e-06	0.0623758	4.9387e-05
EIF2S3	12475	8634	5666	4194	12062	7484	10078	6398	9950	6200	14926	9714	3.46845e-06	0.0624459	4.94034e-05
DESI1	884	1132	1266	1859	1079	1120	720	1171	944	929	1423	1542	3.49828e-06	0.062983	4.9789e-05
MCPH1	279	147	389	223	200	165	169	147	148	149	280	207	3.57422e-06	0.0643503	5.08296e-05
CCDC14	1159	1094	1375	1957	860	1421	938	1368	702	1243	1285	1584	3.58128e-06	0.0644774	5.08898e-05
UTP23	541	486	923	684	551	532	478	461	452	507	732	662	3.59593e-06	0.0647412	5.10577e-05
HAGH	455	331	186	137	217	380	294	358	299	257	526	540	3.60461e-06	0.0648974	5.11406e-05
FAM86B1	19	23	73	55	20	13	21	20	36	38	21	32	3.6701e-06	0.0660765	5.20288e-05
PDE4C	9	127	3	25	1	162	4	138	8	178	6	205	3.70687e-06	0.0667384	5.25086e-05
OSBPL5	156	215	74	72	89	206	103	179	141	249	191	295	3.80048e-06	0.0684238	5.37636e-05
TAP1	1127	2721	737	1388	988	3615	1120	3089	1095	3110	1447	4325	3.80144e-06	0.068441	5.37636e-05
RNF123	955	1084	629	423	860	1278	801	957	832	879	1261	1606	3.80735e-06	0.0685476	5.3805e-05
TWSG1	1530	786	1432	1230	930	800	883	537	796	719	1671	1062	3.81262e-06	0.0686424	5.38372e-05
BCAS3	125	145	48	38	109	89	95	79	79	111	159	154	3.8363e-06	0.0690688	5.41291e-05
MCF2L	248	253	140	83	218	225	194	211	179	243	337	384	3.86589e-06	0.0696014	5.45039e-05
ZNF706	890	1002	1478	1388	825	1194	646	1059	781	1042	1093	1597	3.87666e-06	0.0697954	5.4613e-05
ZNF563	62	232	49	65	46	345	66	272	66	260	82	411	3.88643e-06	0.0699713	5.47078e-05
LRRC34	63	21	101	81	52	38	66	37	71	29	65	35	3.90012e-06	0.0702178	5.48576e-05
SLC2A3	8165	4078	157	201	6548	2956	2577	1015	2409	1176	6763	4024	3.90328e-06	0.0702746	5.48592e-05
RETSAT	801	2663	664	693	678	4233	756	3370	682	3039	1116	5004	3.96806e-06	0.071441	5.57262e-05
GOT1	1057	823	419	543	947	1234	693	1087	932	753	1546	1566	3.97149e-06	0.0715027	5.57309e-05
MYO18A	1354	1377	692	541	1017	1164	879	1122	1008	1158	1494	1586	4.0967e-06	0.073757	5.74432e-05
ARHGEF26	94	68	34	19	80	78	65	53	62	76	108	102	4.2282e-06	0.0761245	5.91948e-05
C3orf78	114	138	216	220	101	178	88	123	118	128	169	195	4.22696e-06	0.0761021	5.91948e-05
C10orf76	284	283	424	352	217	189	210	197	231	209	351	376	4.34591e-06	0.0782437	6.07954e-05
USHBP1	5	9	0	0	8	13	4	15	8	25	13	21	4.37482e-06	0.0787643	6.11524e-05
LCP1	1487	1343	7711	10680	57	161	3910	3577	3475	3186	4578	3955	4.40168e-06	0.0792478	6.148e-05
PNPLA4	217	193	112	62	187	221	187	201	194	219	434	439	4.4136e-06	0.0794625	6.15988e-05
NNMT	506	1065	1	0	88	77	332	504	390	291	2103	1335	4.47109e-06	0.0804975	6.23528e-05
POLA1	1255	194	1077	482	994	267	907	187	636	162	1443	309	4.47701e-06	0.080604	6.2387e-05
XRCC5	7721	3479	10052	4723	7147	3087	6961	2815	6068	2694	9963	4147	4.49686e-06	0.0809614	6.26152e-05
PANK2	446	443	681	641	356	487	351	472	352	426	539	637	4.50696e-06	0.0811432	6.27073e-05
CNST	327	619	533	700	209	531	238	401	173	546	375	968	4.51549e-06	0.081297	6.27776e-05
MBD6	402	778	307	279	355	1042	387	822	392	771	491	1186	4.52102e-06	0.0813964	6.28e-05
PDCD1	11	35	0	0	6	25	1	14	3	16	4	29	4.52408e-06	0.0814516	6.28e-05
ISL1	56	13	9	1	31	27	24	20	22	16	50	26	4.55876e-06	0.0820759	6.32326e-05
TOR1AIP1	925	945	1553	1207	774	1179	450	641	644	1005	1184	1548	4.57485e-06	0.0823656	6.3407e-05
KIAA0247	408	1306	292	397	336	1221	291	1207	292	1365	493	1887	4.67197e-06	0.0841142	6.46535e-05
RNF207	169	239	196	398	111	142	150	204	132	221	206	302	4.67139e-06	0.0841036	6.46535e-05
TH1L	1522	1260	2599	1487	1462	1194	1314	1168	1346	935	2122	1628	4.68265e-06	0.0843065	6.47515e-05
IGDCC4	44	59	17	7	60	76	34	41	27	65	52	64	4.72462e-06	0.085062	6.52817e-05
FAM107B	1514	673	370	399	1364	901	840	711	901	587	1540	1000	4.77705e-06	0.0860059	6.59555e-05
PPAP2B	141	193	34	11	86	143	74	95	87	137	90	118	4.78598e-06	0.0861667	6.60281e-05
HOXA11	236	138	160	57	204	212	238	162	244	217	316	308	4.8172e-06	0.0867288	6.6408e-05
ZBTB20	0	4	42	28	1	11	0	0	2	28	0	0	4.82671e-06	0.0869001	6.64882e-05
NRGN	219	88	293	289	238	214	145	126	175	89	226	143	4.83494e-06	0.0870482	6.65506e-05
TRIM3	195	606	167	151	160	794	143	655	179	622	254	884	4.85769e-06	0.0874578	6.68127e-05
PLAG1	284	224	393	269	108	194	154	161	104	151	219	311	4.87402e-06	0.0877519	6.69862e-05
B3GNT5	465	132	616	388	363	203	483	146	238	134	592	291	4.88764e-06	0.0879971	6.71221e-05
MLH3	443	435	639	585	357	529	309	423	222	429	416	662	4.95434e-06	0.089198	6.79863e-05
ITGA5	1296	1408	1479	1853	797	1449	610	1089	933	1254	1174	1939	4.97151e-06	0.089507	6.81699e-05
FLYWCH1	324	631	755	460	230	627	212	639	276	621	327	892	5.04921e-06	0.0909059	6.91826e-05
SPRED2	940	772	1440	860	714	712	627	722	608	659	1011	1035	5.05968e-06	0.0910945	6.92734e-05
MLXIPL	78	261	15	20	32	250	43	365	40	233	68	286	5.07858e-06	0.0914347	6.94265e-05
SOCS2	519	832	210	258	356	557	345	673	384	517	579	928	5.07487e-06	0.091368	6.94265e-05
HJURP	948	510	1129	1925	722	1382	664	942	720	714	1170	1048	5.14632e-06	0.0926543	7.02991e-05
RPS19BP1	711	488	1263	764	723	582	676	622	804	427	1112	754	5.21192e-06	0.0938354	7.11413e-05
MTSS1L	1294	1392	650	667	1034	1706	868	1328	937	1171	1464	1961	5.2326e-06	0.0942078	7.13695e-05
LSM14B	591	469	924	651	400	604	434	524	420	454	690	813	5.33268e-06	0.0960096	7.26245e-05
ZNF397	1582	1492	315	260	1010	1407	1017	1264	363	756	1422	1872	5.33135e-06	0.0959857	7.26245e-05
TXNDC16	202	161	52	71	122	297	140	155	114	165	272	270	5.35817e-06	0.0964685	7.29165e-05
ZFAND3	583	544	741	586	403	332	376	361	387	316	662	574	5.37134e-06	0.0967056	7.30405e-05
PFKFB2	876	1356	296	341	519	1909	529	947	361	1205	856	1888	5.46397e-06	0.0983733	7.4244e-05
PIK3C3	574	543	804	627	431	467	435	404	355	443	555	650	5.4699e-06	0.0984801	7.42685e-05
EFNB1	298	994	274	273	296	1181	206	1041	367	942	404	1334	5.49112e-06	0.0988621	7.45005e-05
CASP3	391	362	586	701	354	595	345	437	339	406	574	635	5.51072e-06	0.099215	7.47101e-05
GAS6	561	564	222	309	456	753	394	688	535	412	702	903	5.59675e-06	0.100764	7.58193e-05
NHS	67	52	0	3	23	50	35	54	14	54	10	29	5.65638e-06	0.101838	7.65696e-05
NECAP1	517	466	703	725	447	467	387	470	368	454	570	800	5.73345e-06	0.103225	7.75545e-05
PLCD3	562	795	321	349	530	959	371	615	584	682	716	1091	5.75415e-06	0.103598	7.77761e-05
CCDC122	18	34	28	61	9	18	4	17	9	29	9	24	5.77461e-06	0.103966	7.79408e-05
NUP107	2436	823	2350	1782	2003	1193	2096	972	1690	833	2901	1327	5.775e-06	0.103973	7.79408e-05
SEPT3	829	724	1195	877	616	883	567	672	466	578	929	921	5.78774e-06	0.104202	7.80543e-05
FLVCR2	87	132	48	29	67	171	67	87	65	114	123	173	5.79926e-06	0.10441	7.81292e-05
SIN3A	1308	755	1469	1108	974	692	959	658	787	654	1386	1016	5.80197e-06	0.104459	7.81292e-05
CTIF	514	404	325	88	353	229	385	285	368	321	569	548	5.8647e-06	0.105588	7.89149e-05
PIDD	491	1569	469	633	651	1967	458	1889	700	1684	775	2432	5.88598e-06	0.105971	7.9142e-05
TTC5	415	285	279	94	390	264	352	245	385	300	545	417	5.89688e-06	0.106167	7.92295e-05
MYL12A	2491	1747	2575	2670	1519	1131	1783	1528	2066	1110	3390	2175	5.93547e-06	0.106862	7.96884e-05
KLHL21	1947	3408	1466	1275	2067	3403	1503	2623	2078	2946	2770	4800	5.95935e-06	0.107292	7.99494e-05
CAPZB	2139	1160	2428	1596	1689	838	1559	918	1823	771	2801	1410	6.00259e-06	0.108071	8.04696e-05
FAM212B	133	613	96	170	113	853	109	863	133	673	195	1150	6.05165e-06	0.108954	8.10669e-05
FAM117A	212	180	80	89	125	244	205	214	173	151	230	269	6.10257e-06	0.109871	8.16319e-05
INTS8	1106	964	1849	1167	823	1060	879	974	438	640	1282	1489	6.1029e-06	0.109877	8.16319e-05
GSS	1107	1336	2077	1659	1125	1380	921	1391	1231	1473	1316	1842	6.19207e-06	0.111482	8.27632e-05
HES4	426	332	69	143	204	295	215	252	196	223	450	372	6.20079e-06	0.111639	8.28183e-05
LRP8	1921	999	1073	314	1409	763	1590	649	1111	733	2283	1212	6.42139e-06	0.115611	8.5701e-05
CDC6	2094	687	1933	2245	2002	1651	1636	1258	1728	934	2670	1504	6.44097e-06	0.115963	8.58351e-05
DIRAS3	3	2	6	43	1	4	5	3	2	2	23	11	6.43702e-06	0.115892	8.58351e-05
CDKN1C	131	151	22	22	116	371	98	197	99	187	113	203	6.50825e-06	0.117174	8.66675e-05
IFIT1	28	63	7	2	37	145	73	56	27	75	99	90	6.61271e-06	0.119055	8.79935e-05
MRI1	760	1063	531	368	691	1151	596	1057	602	1052	860	1356	6.72757e-06	0.121123	8.94558e-05
XPC	715	2297	678	623	755	2921	565	2563	635	2312	885	3626	6.73557e-06	0.121267	8.94961e-05
BAIAP2L1	1120	1120	450	656	1021	1022	849	1174	954	913	1272	1531	6.75145e-06	0.121553	8.96409e-05
MCM3	3623	889	2554	2689	3765	1660	3221	1278	3173	907	4869	1542	6.75743e-06	0.121661	8.96542e-05
PAK6	516	384	254	237	471	470	456	457	546	407	738	638	6.83191e-06	0.123002	9.05756e-05
BAMBI	123	163	71	24	153	304	101	165	123	212	187	212	6.96953e-06	0.125479	9.23321e-05
PRR24	101	58	13	23	58	78	40	44	58	51	87	58	6.99352e-06	0.125911	9.25818e-05
MSX2	137	175	46	48	85	277	86	163	103	185	137	189	7.03921e-06	0.126734	9.31182e-05
ITPKC	254	599	199	194	233	668	196	562	240	624	378	972	7.0749e-06	0.127377	9.35217e-05
IL32	2589	2417	2375	5040	2715	1974	2091	2103	3218	2260	3400	3018	7.09953e-06	0.12782	9.37783e-05
RPH3AL	77	109	32	14	90	80	63	58	71	55	76	99	7.15464e-06	0.128812	9.44371e-05
TTLL5	393	185	472	306	283	167	333	133	274	161	548	253	7.18577e-06	0.129373	9.47784e-05
EIF4E3	624	412	337	137	440	374	423	358	303	347	729	616	7.23943e-06	0.130339	9.54164e-05
NIPAL3	920	1412	486	626	723	1105	760	1137	681	1355	1087	2050	7.26586e-06	0.130815	9.56946e-05
PTPN12	799	669	1097	817	552	613	625	533	441	630	818	961	7.31002e-06	0.13161	9.61554e-05
WRAP73	635	742	470	271	598	694	598	811	585	607	897	1139	7.31153e-06	0.131637	9.61554e-05
STYXL1	208	179	286	289	163	171	148	183	211	170	184	221	7.34571e-06	0.132252	9.65344e-05
REEP2	808	1675	673	596	724	1872	751	2124	768	1635	1068	2622	7.36471e-06	0.132594	9.67135e-05
VWA5B2	76	117	13	30	27	167	60	137	42	69	87	191	7.37341e-06	0.132751	9.67573e-05
TEF	145	136	250	145	111	114	76	108	92	120	126	149	7.40515e-06	0.133322	9.71029e-05
WDR67	290	213	417	304	208	304	179	243	162	205	259	290	7.4772e-06	0.13462	9.79764e-05
ADAM9	2046	1266	1931	2021	1387	596	1167	522	1212	797	2630	1460	7.50545e-06	0.135128	9.82749e-05
CUTC	192	98	316	139	196	102	138	94	146	76	159	128	7.53427e-06	0.135647	9.85806e-05
C20orf112	334	384	126	137	148	367	156	346	143	312	277	548	7.66335e-06	0.137971	0.000100124
SLC9A3R2	570	476	313	186	498	500	420	405	504	275	694	638	7.65863e-06	0.137886	0.000100124
BZW2	1961	1104	2663	1675	2019	1036	1581	1061	2091	854	2869	1497	7.91592e-06	0.142518	0.000103349
DECR2	159	241	105	86	140	273	144	286	174	249	200	353	8.07954e-06	0.145464	0.000105409
TMEM231	248	146	314	234	167	95	184	126	175	156	300	189	8.1285e-06	0.146346	0.000105971
AP2S1	917	505	1268	955	900	638	835	598	1074	483	1312	834	8.16184e-06	0.146946	0.0001061
HIVEP2	712	881	870	1240	354	672	290	389	279	643	672	1045	8.1498e-06	0.146729	0.0001061
IQGAP1	2667	2156	2956	2890	1590	2080	1864	1705	1314	1999	2882	2999	8.16199e-06	0.146949	0.0001061
SLC17A9	771	807	1092	1218	651	703	695	886	812	679	991	1167	8.15678e-06	0.146855	0.0001061
CBFA2T3	126	134	53	49	78	146	75	127	121	124	157	209	8.195e-06	0.147543	0.000106452
IRGQ	1111	2110	555	978	765	2213	735	1987	764	1964	1164	3012	8.20831e-06	0.147782	0.000106548
EEA1	954	678	1525	923	711	708	837	516	382	713	917	834	8.23351e-06	0.148236	0.000106798
SPDYE6	90	102	94	240	14	126	44	77	17	118	42	220	8.2464e-06	0.148468	0.000106888
MRO	11	7	0	0	18	11	8	10	13	6	7	7	8.3417e-06	0.150184	0.000108046
INCA1	24	37	43	82	18	34	16	32	15	40	25	47	8.35017e-06	0.150336	0.000108078
ARHGAP26	235	220	94	62	131	182	183	137	117	168	250	291	8.42006e-06	0.151595	0.000108904
CHN2	2	4	29	11	1	9	1	3	1	5	6	11	8.43559e-06	0.151874	0.000109027
TMEM175	146	239	60	114	131	287	122	343	187	305	172	420	8.50894e-06	0.153195	0.000109896
SYP	5	4	26	23	8	4	6	8	7	6	5	6	8.6919e-06	0.156489	0.000112179
SNAPC2	237	230	390	274	151	304	128	168	203	209	233	327	8.76463e-06	0.157798	0.000113036
KIF2A	1283	668	1679	854	825	661	894	633	652	693	1381	945	8.97048e-06	0.161504	0.000115443
RAP1B	2359	2601	3327	3466	2123	2450	1878	2397	1806	2297	3085	3672	8.96655e-06	0.161434	0.000115443
USP18	220	182	109	102	232	223	285	205	227	166	353	263	8.96611e-06	0.161426	0.000115443
DCAF16	1443	1212	673	714	1091	1680	1114	1350	848	1173	1569	2157	9.04577e-06	0.16286	0.000116329
SLC12A4	918	2853	643	1152	834	2569	731	2862	876	2832	1197	4029	9.05364e-06	0.163002	0.000116347
MYH14	1323	1228	206	389	1042	1264	752	911	524	536	1410	1614	9.11332e-06	0.164076	0.000116947
PSMD2	10936	11490	17985	13716	8915	11415	7891	10180	10075	10366	14884	19839	9.1081e-06	0.163982	0.000116947
MLKL	195	236	494	347	282	222	234	279	291	235	322	333	9.12764e-06	0.164334	0.000117047
OMA1	322	275	149	104	336	235	244	200	211	200	395	287	9.16057e-06	0.164927	0.000117386
MTMR11	252	183	92	101	152	168	205	212	186	235	330	341	9.27781e-06	0.167038	0.000118803
BZW1	2955	2046	4275	2788	2461	2481	2565	1971	1934	1788	3868	3101	9.29274e-06	0.167306	0.00011891
NFKBIA	333	340	299	799	321	402	233	296	295	474	386	566	9.36884e-06	0.168677	0.000119799
CCDC147	6	7	13	46	3	9	7	20	2	7	7	13	9.41913e-06	0.169582	0.000120335
ODF2L	335	420	539	539	230	530	278	372	196	381	448	646	9.42413e-06	0.169672	0.000120335
ADAM8	15	38	7	2	18	39	17	35	23	52	55	94	9.50546e-06	0.171136	0.000121287
NKAIN1	95	89	42	19	88	74	62	66	104	72	95	83	9.62464e-06	0.173282	0.000122721
ZBED4	877	610	1247	701	645	588	630	552	447	520	911	854	9.79196e-06	0.176294	0.000124766
FLOT1	1438	1154	1353	1961	1005	1161	857	1033	1124	912	1861	1689	1.00116e-05	0.180249	0.000127475
SUMO1	1776	910	2081	1600	1749	899	1471	912	1703	801	2536	1406	1.01407e-05	0.182573	0.000129027
CCNB3	57	66	24	7	48	75	32	44	30	75	46	71	1.01612e-05	0.182942	0.000129196
FUT1	193	226	88	101	125	266	136	282	153	277	195	303	1.01846e-05	0.183364	0.000129403
SIDT2	305	829	210	243	170	807	203	824	237	799	346	1307	1.02089e-05	0.183801	0.00012962
ZGLP1	40	68	19	22	41	70	32	77	64	82	72	114	1.02824e-05	0.185124	0.000130461
EIF3H	5044	3701	7296	4981	4714	3598	4229	3608	4834	2835	7162	4815	1.04365e-05	0.187899	0.000132323
CABLES1	255	123	80	61	255	117	209	88	229	77	311	130	1.05398e-05	0.189759	0.000133445
ZDHHC2	530	150	598	383	193	104	312	128	159	132	407	209	1.05337e-05	0.189648	0.000133445
RABGEF1	728	894	1142	981	580	786	516	816	494	766	784	1317	1.05569e-05	0.190066	0.000133567
CEBPB	383	231	544	367	284	225	110	174	247	203	257	314	1.0619e-05	0.191184	0.000134259
ANKRD1	395	737	1	5	125	330	27	66	233	317	189	821	1.06737e-05	0.192169	0.000134856
ARPC4	1026	1048	1787	1411	998	1041	934	1084	1258	941	1447	1508	1.0777e-05	0.194029	0.000136065
CREG1	1069	904	678	458	1061	1364	794	837	1012	923	1521	1384	1.07879e-05	0.194225	0.000136107
DNAJC10	1247	944	1738	1398	1197	975	1041	800	892	1004	1809	1389	1.08155e-05	0.194723	0.00013636
CC2D1B	657	1001	376	441	523	1102	469	935	578	959	686	1476	1.0908e-05	0.196388	0.000137427
DCPS	295	99	412	189	280	117	257	89	285	91	432	134	1.09154e-05	0.19652	0.000137427
BBC3	105	324	71	53	123	282	54	379	100	283	122	441	1.12974e-05	0.203399	0.000142138
CPNE1	1739	1921	3064	1915	1462	1718	1269	1449	1675	1326	2430	2715	1.13415e-05	0.204193	0.000142593
E2F2	756	150	442	678	468	341	465	276	332	148	759	323	1.13717e-05	0.204736	0.000142872
VIPR1	28	36	7	4	16	25	29	50	24	31	27	45	1.13834e-05	0.204946	0.000142919
APOBEC3H	1	44	0	0	1	33	1	72	2	68	2	109	1.14339e-05	0.205857	0.000143454
ATG9A	2057	1704	1047	804	1484	1653	1303	1467	1749	1396	2417	2418	1.15461e-05	0.207875	0.00014476
SLC25A32	1094	829	1485	1265	1051	900	926	830	854	732	1410	1267	1.18951e-05	0.214159	0.000149032
KIAA0319	44	46	3	10	39	46	76	27	42	43	57	43	1.1931e-05	0.214806	0.000149379
AIDA	1199	884	1533	1543	1051	1149	993	876	1049	899	1726	1429	1.20479e-05	0.216911	0.00015069
TUBA1B	31341	8407	26698	23181	33899	15183	28126	10102	34544	7958	47571	12751	1.20525e-05	0.216993	0.00015069
MSRB1	614	415	294	264	496	594	527	508	568	407	786	710	1.20807e-05	0.217501	0.000150938
YIPF2	245	288	160	114	262	243	237	323	276	256	365	514	1.21156e-05	0.218129	0.000151269
POLE4	415	297	697	595	523	303	419	359	564	247	566	391	1.245e-05	0.224151	0.000155337
SPTBN2	2169	1590	1148	663	1509	1417	1595	1239	1496	1299	2402	2083	1.28317e-05	0.231021	0.000159987
NF2	730	663	968	972	706	543	613	586	677	520	1008	951	1.29783e-05	0.233662	0.000161703
NETO2	697	755	2014	1594	1023	1411	721	1162	862	1098	849	941	1.30353e-05	0.234687	0.000162301
ARHGEF19	165	191	77	107	144	311	134	231	159	200	228	314	1.31985e-05	0.237626	0.00016422
MTHFR	119	345	55	176	93	427	130	384	83	323	135	646	1.32742e-05	0.238988	0.000165047
ACBD7	403	277	47	195	341	607	239	435	232	297	587	594	1.33115e-05	0.23966	0.000165397
OXCT1	2603	1045	2942	1850	2297	1245	2335	1122	1861	928	3784	1520	1.33354e-05	0.240091	0.00016558
HPCAL4	273	135	15	46	144	126	143	119	105	100	161	115	1.34536e-05	0.242218	0.000166932
MTO1	654	685	392	274	497	667	459	656	485	632	824	1069	1.34715e-05	0.242542	0.00016704
POU3F1	4	17	0	0	6	15	0	14	2	18	9	26	1.38634e-05	0.249597	0.00017178
ACYP1	120	73	141	189	86	124	116	89	102	74	162	94	1.40103e-05	0.252242	0.000173482
LRRC69	8	12	29	28	6	10	12	8	4	5	6	14	1.42786e-05	0.257072	0.000176653
RPRD1B	757	725	1075	982	582	778	597	766	522	687	888	1039	1.42861e-05	0.257207	0.000176653
CD101	54	25	20	4	38	38	31	20	46	30	90	61	1.43485e-05	0.258331	0.000177181
CTH	474	122	50	48	384	191	200	106	309	164	333	188	1.43398e-05	0.258173	0.000177181
TESK2	118	158	48	58	89	179	72	175	78	164	120	169	1.43624e-05	0.25858	0.000177231
PTCHD4	3	39	0	0	12	38	5	36	38	81	10	55	1.44477e-05	0.260116	0.000178162
C2orf16	35	130	61	178	21	167	27	90	11	116	27	180	1.46431e-05	0.263634	0.000180324
LDHD	25	104	10	23	22	167	21	99	32	139	30	146	1.4639e-05	0.263561	0.000180324
TOP3A	689	543	945	900	569	787	553	571	524	605	829	899	1.4676e-05	0.264227	0.000180606
NCEH1	154	237	257	375	130	320	110	243	93	286	230	436	1.47027e-05	0.264707	0.000180808
UBFD1	1772	1713	977	913	1497	2159	1376	1777	1290	1535	2212	2812	1.47125e-05	0.264884	0.000180808
PTCH2	32	75	10	17	24	74	24	72	30	57	35	87	1.48164e-05	0.266754	0.00018196
JMJD7-PLA2G4B	201	198	114	72	150	233	142	201	161	206	238	350	1.48951e-05	0.268171	0.000182678
POLD3	317	94	379	231	217	163	274	124	236	118	377	182	1.48909e-05	0.268097	0.000182678
SMCR7L	1613	1577	2523	1893	1435	1823	1262	1430	1145	1396	1890	2383	1.49368e-05	0.268921	0.000183064
EI24	2455	3436	1977	1581	2905	4884	2096	3713	2342	3358	3602	5733	1.50949e-05	0.271768	0.000184876
MCF2L2	12	16	17	58	3	17	7	11	4	22	13	26	1.51058e-05	0.271964	0.000184884
AIFM3	18	32	1	2	11	41	5	15	13	33	8	30	1.51528e-05	0.272811	0.000185334
CLDN1	0	3	0	27	0	3	0	0	0	2	0	1	1.52042e-05	0.273736	0.000185836
GBP3	114	337	204	590	138	518	112	334	113	291	233	556	1.52924e-05	0.275324	0.000186787
SLC44A3	17	19	3	3	15	24	27	31	18	15	32	19	1.53153e-05	0.275737	0.00018694
POLE2	393	104	492	238	387	191	328	139	346	120	383	139	1.53518e-05	0.276394	0.000187258
ZBTB8A	503	450	225	215	355	578	298	417	263	468	503	687	1.53908e-05	0.277096	0.000187607
PRKCZ	536	587	337	185	414	432	382	435	513	411	632	719	1.5463e-05	0.278396	0.00018836
CTNNA1	4008	2570	4646	3424	3336	2172	3216	2192	3290	2214	3739	2798	1.5825e-05	0.284914	0.00019264
ZBTB1	438	520	601	693	342	610	343	392	260	478	504	740	1.58493e-05	0.28535	0.000192804
HSPB11	265	151	366	345	224	257	215	225	236	180	369	306	1.59469e-05	0.287109	0.000193861
NUDT21	3612	1405	4315	2326	2992	1842	2927	1564	2100	1351	4189	2472	1.59623e-05	0.287386	0.000193918
R3HDM1	670	473	988	559	560	431	573	381	480	402	712	577	1.61961e-05	0.291595	0.000196625
SCRN1	7	15	27	33	7	22	2	10	5	21	1	28	1.62641e-05	0.292818	0.000197317
LOC100996455	14	9	0	0	10	13	5	11	5	9	5	15	1.62941e-05	0.293358	0.000197508
TRDMT1	84	67	219	73	87	57	77	62	58	72	123	92	1.63018e-05	0.293497	0.000197508
CDKN2D	92	142	47	50	66	168	65	129	105	109	170	182	1.63296e-05	0.293999	0.000197713
NOTCH3	26	54	12	6	36	61	23	37	20	39	33	64	1.64494e-05	0.296155	0.000199029
AJUBA	1171	1109	463	394	778	1554	676	798	710	811	1227	1514	1.65287e-05	0.297582	0.000199467
PFN1	9947	5209	15026	8247	9524	6046	7344	4855	11586	4065	14706	7490	1.65299e-05	0.297605	0.000199467
TCEANC	24	25	6	3	11	51	19	31	20	31	20	40	1.65091e-05	0.29723	0.000199467
ZMAT3	954	4478	1194	1476	1691	4388	1521	3831	1127	4508	1825	6048	1.6507e-05	0.297191	0.000199467
P2RY2	71	88	24	10	49	63	26	54	41	83	65	83	1.67065e-05	0.300783	0.000201462
VAPB	1026	735	1354	1082	918	685	874	724	737	659	1397	1081	1.67923e-05	0.302328	0.000202361
UBASH3B	921	1023	583	426	768	1220	607	941	576	1028	1228	1716	1.68351e-05	0.3031	0.000202742
FZD2	148	68	72	22	95	106	126	79	104	83	174	105	1.68549e-05	0.303456	0.000202845
INPP5D (NC_000002 234054294..234117049)	11	204	0	1	4	95	6	201	19	362	11	385	1.70421e-05	0.306825	0.00020496
PIM2	354	729	281	297	354	1117	354	865	376	742	549	1082	1.71192e-05	0.308214	0.000205751
SLFN5	117	397	249	523	66	621	73	321	45	507	102	600	1.74361e-05	0.31392	0.000209419
SEC24C	1344	1744	2345	2041	1060	1694	1148	1855	1167	1712	1784	2875	1.74553e-05	0.314266	0.000209511
SPPL2B	236	362	108	155	162	341	181	470	200	350	263	553	1.74921e-05	0.314927	0.000209812
TIMM10	416	176	527	397	389	278	334	247	428	199	547	296	1.75098e-05	0.315246	0.000209884
GRIN2C	19	75	10	9	24	101	19	104	20	131	28	135	1.75504e-05	0.315978	0.000210231
DHX40	541	413	678	574	342	393	429	394	317	391	570	594	1.76349e-05	0.317498	0.000211102
C1orf112	396	192	407	420	231	276	342	265	259	207	433	312	1.781e-05	0.320651	0.000213057
GP1BB	35	58	15	9	18	80	22	63	25	74	35	90	1.7893e-05	0.322146	0.000213908
MAPRE1	3149	2187	3513	3446	2418	2226	2369	2080	2328	1917	4156	3409	1.7927e-05	0.322757	0.000214172
CHRD	158	153	46	60	103	119	131	193	117	133	135	201	1.79484e-05	0.323143	0.000214286
KHDRBS1	4075	2021	4680	3098	3156	2218	3092	1979	2901	1933	4647	2933	1.79622e-05	0.323391	0.000214308
PWWP2A	302	241	404	409	263	343	238	297	202	213	310	369	1.80297e-05	0.324607	0.000214972
PDZD7	45	70	14	21	35	64	34	57	50	79	44	96	1.81576e-05	0.32691	0.000216353
C11orf52	13	9	0	0	7	15	6	10	7	11	7	8	1.85354e-05	0.333711	0.000220708
ASMTL (NC_000024 1471531..1523155)	314	191	141	77	216	143	240	186	322	179	369	260	1.8584e-05	0.334586	0.000221141
ZNF74	429	447	292	149	337	503	302	459	377	411	471	640	1.85975e-05	0.334829	0.000221155
CCDC56	327	234	579	364	365	272	346	224	357	227	517	344	1.86696e-05	0.336128	0.000221867
LOX	6	11	56	14	6	14	10	11	7	11	14	22	1.86837e-05	0.336381	0.000221887
MMP1	0	7	32	12	1	1	0	3	3	19	0	9	1.87244e-05	0.337114	0.000222224
NUP35	265	88	386	188	307	116	246	93	256	95	380	146	1.88845e-05	0.339996	0.000223976
TTC14	231	303	368	395	179	326	188	258	184	296	277	401	1.91404e-05	0.344603	0.000226862
CPT2	612	671	307	365	490	653	520	663	518	650	880	976	1.92465e-05	0.346515	0.00022797
GPM6B	52	91	20	29	48	124	35	95	29	89	57	144	1.93361e-05	0.348126	0.00022888
SF3A3	5597	3864	3837	2128	6358	5063	4953	3968	5740	3914	7958	6065	1.96816e-05	0.354347	0.000232817
TGFBR2	117	133	236	166	93	128	90	108	105	135	161	209	1.97606e-05	0.35577	0.000233445
USP16	718	545	1142	615	559	584	484	467	438	500	924	874	1.97524e-05	0.355623	0.000233445
ZNF644	987	767	1126	962	679	818	670	605	443	627	982	927	1.9853e-05	0.357433	0.000234382
PPP1R12C	226	461	540	490	248	541	212	515	252	433	307	669	2.01002e-05	0.361883	0.000237145
FAM219B	690	723	383	345	539	787	475	884	553	736	744	976	2.01318e-05	0.362453	0.000237363
TMBIM4	284	456	827	389	355	434	244	322	405	436	488	571	2.02992e-05	0.365467	0.00023918
VPS11	799	992	467	412	583	1015	503	857	661	1029	853	1401	2.05243e-05	0.369519	0.000241674
MOCS3	167	206	304	207	139	191	112	179	108	186	159	243	2.06159e-05	0.371168	0.000242593
TFCP2L1	519	376	235	189	370	398	359	401	278	405	548	600	2.06843e-05	0.3724	0.000243239
CEP70	319	234	143	134	233	304	289	255	199	232	435	429	2.07178e-05	0.373003	0.000243475
WDR78	1	2	9	20	0	7	1	2	1	6	0	7	2.08495e-05	0.375374	0.000244862
CSRP1	1225	1764	1623	3242	1384	1686	1090	1291	1347	1122	2422	2985	2.10086e-05	0.378239	0.00024657
CLN8	142	376	277	407	150	342	83	323	119	330	186	545	2.1148e-05	0.380749	0.000248045
ICOSLG	244	507	186	175	214	735	166	542	234	454	298	853	2.12813e-05	0.383149	0.000249446
ANKRD13A	859	1698	2003	1206	613	1353	671	1117	588	1253	1167	2618	2.13525e-05	0.384431	0.000250118
KCNH3	23	23	4	2	8	30	22	16	14	23	29	28	2.14185e-05	0.385618	0.000250727
MUTYH	92	92	182	175	98	118	83	137	115	117	120	132	2.16283e-05	0.389397	0.000253019
FAM177A1	417	449	187	258	364	518	337	366	390	389	649	650	2.17347e-05	0.391312	0.000254099
GNG7	65	30	15	9	43	41	38	34	55	38	53	31	2.18139e-05	0.392738	0.000254757
NUDT13	79	56	105	118	61	55	66	41	72	54	84	84	2.18193e-05	0.392836	0.000254757
PER2	284	308	542	391	299	434	203	368	225	365	282	515	2.18671e-05	0.393696	0.000255149
ARHGEF11	753	846	1088	991	505	916	617	741	541	712	813	1093	2.19894e-05	0.395898	0.000256245
LMNB1	2256	410	2028	1035	1877	785	1764	593	1731	465	2635	678	2.19757e-05	0.395651	0.000256245
GADD45B	394	256	56	96	417	664	263	251	318	282	463	409	2.2207e-05	0.399814	0.000258612
MCM4	7997	2757	7304	7023	7325	5583	6305	4054	5730	3185	10323	5220	2.22989e-05	0.40147	0.000259515
HRH1	161	412	306	508	165	444	111	415	117	446	239	612	2.25152e-05	0.405363	0.000261862
RNASE4	155	104	92	31	139	208	170	190	115	143	201	191	2.25466e-05	0.40593	0.000262059
TIPARP	468	512	802	736	479	807	350	496	331	578	683	919	2.26018e-05	0.406923	0.000262531
MORC4	1333	2530	1005	1175	1292	3362	995	3380	1199	2671	1838	4341	2.26355e-05	0.407529	0.000262752
GRTP1	157	143	91	47	138	156	132	153	123	159	157	225	2.27785e-05	0.410105	0.000264243
ISG15	495	1043	295	362	434	1578	414	1275	541	906	563	1558	2.29008e-05	0.412307	0.00026549
BAIAP2L2	9	22	0	2	5	13	13	27	11	27	10	21	2.32091e-05	0.417856	0.000268891
RND3	727	1011	291	223	723	1344	398	604	358	868	914	1414	2.32969e-05	0.419437	0.000269703
TNS4	1231	224	1	1	2070	441	127	16	743	138	1672	364	2.33091e-05	0.419657	0.000269703
PC	67	66	28	24	51	66	82	85	84	64	97	88	2.34496e-05	0.422187	0.000271154
LDB1	1059	1828	708	660	666	2056	726	2044	658	1801	1228	2648	2.35606e-05	0.424185	0.000272262
TMC6	816	885	339	402	473	791	511	673	580	604	840	1079	2.37264e-05	0.427171	0.000274003
ARHGAP11A	2539	756	3019	2195	2085	1972	2110	1239	1483	1064	3138	1701	2.37444e-05	0.427494	0.000274035
RAET1G	32	56	9	12	15	85	15	55	29	74	34	66	2.38818e-05	0.429968	0.000275444
CNNM4	568	695	370	265	498	903	373	667	384	677	604	1090	2.39238e-05	0.430725	0.000275752
DAAM1	403	425	145	176	226	431	206	338	146	384	355	571	2.39979e-05	0.432059	0.000276429
TYMP	151	233	384	456	129	156	103	186	258	288	206	229	2.41929e-05	0.435568	0.000278496
FBXW7	394	1371	401	324	383	2020	298	1633	285	1663	499	2447	2.42654e-05	0.436875	0.000279153
CMBL	932	2043	920	756	1213	2982	793	2170	835	2236	1501	3524	2.43824e-05	0.43898	0.00028032
YAP1	2037	1775	2365	2050	1557	1648	1175	972	1153	1398	2300	2023	2.44285e-05	0.43981	0.00028067
CTGF	672	1194	82	390	979	1297	457	527	738	808	815	1384	2.4445e-05	0.440108	0.000280681
EEFSEC	152	107	97	23	141	110	107	63	173	95	242	163	2.45027e-05	0.441147	0.000281164
EP300	663	783	991	676	392	691	476	515	340	617	655	907	2.48936e-05	0.448185	0.000285468
MAPK14	1320	1077	1666	1426	1005	1154	1011	1011	777	890	1430	1623	2.49378e-05	0.448979	0.000285792
DAGLB	556	593	237	330	460	549	353	569	501	445	688	922	2.50536e-05	0.451065	0.000286937
IL12A	52	51	25	19	69	81	44	65	69	74	71	76	2.51209e-05	0.452277	0.000287525
RASD2	23	28	4	3	21	25	19	23	20	19	20	25	2.52865e-05	0.455259	0.000289237
PLXNB1	819	1303	507	462	585	1107	734	1489	627	1201	882	1814	2.53477e-05	0.45636	0.000289753
CCNL2	1448	2247	939	949	1181	1961	1120	2266	1333	1972	1662	3079	2.53687e-05	0.456738	0.000289808
UCHL3	419	388	530	534	438	305	363	258	351	221	626	510	2.55117e-05	0.459313	0.000291257
SLC45A1	34	48	3	9	16	21	19	46	35	51	40	54	2.55371e-05	0.45977	0.000291362
TRAK1	425	304	597	380	317	267	302	268	260	293	489	412	2.562e-05	0.461262	0.000292123
CALD1	412	1196	391	3238	763	1300	380	774	370	1072	963	2099	2.56553e-05	0.461898	0.00029234
FLNA	9866	8324	18156	8883	8066	10080	7219	8039	8809	8251	14254	13444	2.58108e-05	0.464697	0.000293926
RAB9B	10	25	42	48	0	4	5	26	0	6	9	54	2.60194e-05	0.468453	0.000296114
FAM69A	137	113	185	170	86	123	105	73	89	104	155	136	2.62876e-05	0.473282	0.000298964
RAB22A	548	767	936	881	499	847	478	675	417	715	680	1075	2.6303e-05	0.473559	0.000298964
CREB1	738	588	917	728	470	642	551	488	349	552	722	770	2.6362e-05	0.474621	0.000299445
ANXA5	4079	5160	7022	8993	4456	6154	3289	5129	6046	5419	6568	8801	2.66458e-05	0.479731	0.000302479
MCM9	156	121	239	161	134	122	124	71	111	109	154	150	2.68633e-05	0.483647	0.000304656
WHSC1	3011	1067	3408	1671	2125	1256	2157	1151	1761	1067	3497	1735	2.68715e-05	0.483794	0.000304656
PTPRA	921	618	1228	793	664	482	717	589	682	564	1159	815	2.70085e-05	0.486261	0.000306017
NEIL2	274	222	532	259	292	225	219	209	268	195	356	303	2.71659e-05	0.489095	0.000307607
CDC25A	1569	538	1263	1383	1546	866	1372	727	1319	538	1960	906	2.74595e-05	0.494382	0.000310736
EVI5L	205	324	87	129	98	265	132	295	186	286	240	374	2.75985e-05	0.496883	0.000312112
KIF16B	430	306	634	329	281	279	287	231	225	266	545	398	2.76564e-05	0.497927	0.000312572
KPNB1	8072	3592	9826	5185	6659	4110	6956	3482	5406	3160	9617	5030	2.7912e-05	0.502527	0.000315262
MYEOV	649	569	78	108	402	239	304	279	561	405	514	459	2.80312e-05	0.504674	0.00031641
PFDN1	839	636	926	1083	839	583	678	587	855	511	1206	913	2.81427e-05	0.506681	0.00031747
MYADM	826	962	839	1502	689	835	607	796	722	800	1031	1225	2.84913e-05	0.512957	0.0003212
C8orf59	742	400	1172	558	745	400	657	380	747	342	1207	540	2.86207e-05	0.515286	0.000322434
NUP93	1830	721	1976	1261	1726	790	1452	761	1670	619	2382	995	2.86366e-05	0.515573	0.000322434
SLC7A2	808	256	1190	339	602	271	592	196	345	248	872	347	2.93705e-05	0.528787	0.000330492
ERCC6	380	485	146	219	222	474	258	344	165	442	344	663	2.96802e-05	0.534362	0.000333768
PAK2	2358	2006	2975	2360	1884	1738	1740	1474	1348	1562	2888	2814	3.05983e-05	0.550892	0.000343822
PPM1G	4350	2331	4642	4296	4096	2865	3477	2674	4243	1991	5831	3574	3.06125e-05	0.551147	0.000343822
INPP5A	506	339	264	136	424	241	417	258	415	271	594	403	3.09812e-05	0.557785	0.000347746
CPSF4	876	968	709	356	859	1219	678	1090	819	959	995	1502	3.14469e-05	0.56617	0.000352534
DCUN1D5	1170	560	1414	757	1034	424	868	489	905	399	1578	731	3.1444e-05	0.566117	0.000352534
THBS1	3	7	5	38	2	6	1	8	2	4	4	6	3.15741e-05	0.568459	0.000353739
ATP6V0A2	232	203	352	239	149	187	151	162	145	219	258	264	3.21768e-05	0.579311	0.000360268
ST7	350	267	645	362	415	206	379	262	422	238	613	325	3.22249e-05	0.580178	0.000360583
PTOV1	755	614	510	211	624	451	687	611	811	466	961	849	3.24925e-05	0.584995	0.000363351
DDX19B	407	302	600	409	317	311	267	264	375	324	304	317	3.25924e-05	0.586794	0.000364242
BEX5	138	106	72	36	166	204	122	109	178	154	190	169	3.29572e-05	0.593362	0.000368091
ATPAF2	193	203	94	78	157	197	130	198	146	164	215	278	3.2988e-05	0.593915	0.000368205
SEMA3D	484	85	2193	794	1199	178	895	128	6	19	1115	220	3.30421e-05	0.59489	0.000368581
HCFC1R1	383	225	941	220	407	252	227	158	403	163	617	341	3.32987e-05	0.599509	0.000370754
SYT15	78	107	107	137	49	80	56	71	35	89	61	112	3.32904e-05	0.59936	0.000370754
TK2	295	237	126	129	182	251	222	223	237	234	368	437	3.32747e-05	0.599078	0.000370754
GEMIN8	305	196	196	57	309	167	256	169	219	195	334	205	3.36681e-05	0.606161	0.000374636
HOXA5	127	166	86	65	107	269	119	257	160	241	214	310	3.39569e-05	0.611359	0.000377615
HINT3	583	449	363	185	477	526	446	382	389	471	698	745	3.41852e-05	0.61547	0.00037992
ZNF10	483	1048	295	533	454	1122	346	1079	475	984	696	1613	3.46188e-05	0.623277	0.000384502
KIF4A	1181	382	1216	1076	1083	862	931	741	936	493	1623	748	3.49e-05	0.628339	0.000387214
ZNF488	75	45	16	16	76	86	61	57	57	91	77	49	3.4906e-05	0.628448	0.000387214
NOS1AP	73	52	23	15	60	52	51	49	48	48	66	70	3.52165e-05	0.634037	0.000390177
ZFC3H1	901	739	1085	1150	535	795	808	596	377	688	1003	1142	3.51948e-05	0.633648	0.000390177
FAM134B	52	81	16	8	28	77	39	47	31	53	107	145	3.59658e-05	0.647528	0.000398234
MARK3	1233	820	1557	919	885	561	898	687	900	578	1307	1008	3.60752e-05	0.649498	0.0003992
GPT2	1736	855	883	518	1700	1015	1122	940	1490	802	1960	1397	3.61285e-05	0.650457	0.000399544
ZMYM4	1041	783	1340	952	745	742	813	646	635	659	1221	1015	3.67901e-05	0.662369	0.000406611
EBAG9	305	209	515	303	274	193	288	263	272	211	428	315	3.71586e-05	0.669004	0.000410432
SH3BP4	842	775	276	311	531	502	480	468	618	541	908	826	3.73728e-05	0.672861	0.000412545
POFUT1	1190	855	1431	1128	1030	905	766	678	805	695	1329	1158	3.74659e-05	0.674535	0.000413318
GSTP1	5388	5546	3442	2670	5107	6805	4752	5756	7030	5628	7559	7757	3.77615e-05	0.679858	0.000416325
CYB5R3	1767	1572	2129	2033	1389	1237	1244	1232	1725	1155	2243	2083	3.825e-05	0.688654	0.000421453
TMEM63B	595	1510	408	631	446	1523	479	1367	505	1415	799	2444	3.84265e-05	0.691831	0.000423138
GCLC	886	780	579	392	763	1152	683	833	685	919	1117	1282	3.84686e-05	0.692589	0.000423343
GOLGA6L9	318	314	141	140	203	342	237	336	148	262	294	472	3.87497e-05	0.69765	0.000426176
FARSB	1168	488	1495	590	946	365	874	407	814	386	1469	568	3.8833e-05	0.69915	0.000426831
CA13	250	534	543	624	253	423	261	623	220	561	329	727	3.94864e-05	0.710913	0.000433748
PEAR1	1	25	97	182	6	32	1	9	17	132	1	31	3.95135e-05	0.7114	0.000433781
MITF	211	120	76	63	133	169	122	136	104	157	202	201	4.01297e-05	0.722495	0.000440277
COL4A1	2	89	0	1	11	153	1	43	0	124	2	122	4.04104e-05	0.727549	0.000442923
TIE1	0	1	7	10	0	5	0	0	0	0	0	2	4.042e-05	0.727722	0.000442923
ZNF664	2578	1179	2574	2156	2022	1510	1905	1317	1525	1313	2896	2001	4.04831e-05	0.728858	0.000443344
ZNF497	63	89	23	25	34	70	50	101	46	89	62	95	4.07295e-05	0.733293	0.000445771
INSM1	0	0	9	4	0	1	0	0	0	0	0	0	4.09468e-05	0.737206	0.000447605
ZNF267	361	258	394	446	277	368	205	243	185	271	403	419	4.09316e-05	0.736932	0.000447605
PELI3	253	304	147	135	171	389	196	327	179	289	343	552	4.20212e-05	0.756549	0.000459071
SPDYE3	48	61	62	149	44	77	41	67	49	63	52	95	4.26639e-05	0.768121	0.00046581
BUB3	2747	3005	4936	4136	2796	4448	2304	3608	2704	3480	3870	5332	4.27227e-05	0.769179	0.000465952
HPCAL1	415	226	660	305	378	234	273	212	442	210	490	362	4.27286e-05	0.769286	0.000465952
CCDC34	478	267	321	125	416	461	426	300	381	292	623	419	4.31546e-05	0.776955	0.000470312
IMPDH2	3422	2655	2939	1036	2914	3336	2632	3119	3379	2784	4746	4374	4.32263e-05	0.778247	0.000470809
CCDC103	34	32	72	68	18	40	40	39	21	33	31	87	4.33685e-05	0.780807	0.000472072
PTPRF	6108	5452	2480	1764	6550	3788	3623	3095	5550	4776	7889	7630	4.35789e-05	0.784594	0.000474075
GIT2	661	926	1098	894	469	734	564	738	467	691	870	1375	4.36585e-05	0.786027	0.000474654
MSRA	47	52	94	95	43	34	45	54	74	45	64	74	4.37295e-05	0.787306	0.000475139
GDPGP1	9	12	27	47	17	21	13	11	14	15	8	23	4.38401e-05	0.789298	0.000476054
STK3	413	244	438	389	241	185	344	189	255	176	575	363	4.38774e-05	0.789969	0.000476172
CACNA1D	4	15	35	24	2	29	3	19	7	22	7	36	4.45969e-05	0.802923	0.000483688
PARD3B	52	55	21	3	35	39	40	21	24	30	59	69	4.47086e-05	0.804933	0.000484608
CATSPERG	8	115	4	11	5	90	3	65	5	99	12	156	4.4994e-05	0.810073	0.000487408
NCOA6	1200	814	1579	812	803	725	870	577	603	632	1154	1031	4.52901e-05	0.815403	0.00049032
MAP3K7	825	786	1073	1086	626	939	647	806	506	720	1024	1104	4.54374e-05	0.818055	0.000491619
IPO9	2472	1392	2823	2287	1945	1875	1817	1411	1563	1460	3010	2418	4.56067e-05	0.821103	0.000493155
PARM1	0	3	11	9	0	4	0	4	0	1	0	7	4.61014e-05	0.83001	0.000498205
POTEM	2	26	0	0	1	21	1	13	0	23	1	25	4.63115e-05	0.833792	0.000500175
OGFRL1	2350	545	278	136	1746	699	1528	394	746	501	1786	825	4.64576e-05	0.836423	0.000501453
EPHA2	3206	4811	2137	1837	3456	4562	1939	3691	2641	3539	3744	5975	4.67392e-05	0.841493	0.00050419
MINOS1	545	392	897	666	626	509	532	438	713	399	963	607	4.71709e-05	0.849265	0.000508542
GPRIN1	397	256	375	538	306	340	343	346	286	229	396	390	4.74716e-05	0.854679	0.000511477
TMTC3	1027	1505	472	393	629	1724	601	992	404	1591	1110	2329	4.78183e-05	0.860921	0.000514905
DSN1	531	285	640	755	389	589	399	566	351	368	579	577	4.78876e-05	0.862168	0.000515342
TOR3A	998	502	780	210	894	865	698	677	918	632	1081	920	4.82273e-05	0.868284	0.000518688
GPX4	1695	943	860	526	1307	1343	1157	791	1377	691	2114	1428	4.82885e-05	0.869386	0.000519037
WASL	776	932	1227	1198	539	1014	367	500	265	536	905	1351	4.83613e-05	0.870697	0.000519509
EZH1	534	606	346	233	463	472	471	528	412	630	599	749	4.84015e-05	0.871421	0.000519631
C21orf7	1	3	13	47	15	19	0	2	3	7	6	13	4.85105e-05	0.873384	0.000520491
PIGH	298	345	228	147	302	462	326	413	262	312	420	556	4.86902e-05	0.876618	0.000522107
GDPD5	182	346	102	124	110	280	115	349	159	293	206	503	4.87222e-05	0.877194	0.000522139
SFN	817	1537	648	719	988	2101	882	2120	1207	1646	1355	2704	4.88022e-05	0.878636	0.000522686
CDC123	3357	1820	4156	2758	3386	1656	3167	1657	3493	1492	4772	2594	4.92874e-05	0.88737	0.000527568
EHBP1L1	1288	1282	1432	1877	828	1619	813	1319	892	1085	1385	1947	4.93231e-05	0.888013	0.000527637
ECH1	1578	1341	1153	606	1469	1727	1235	1411	1562	1409	1752	1958	5.01919e-05	0.903655	0.000536612
IL27RA	290	554	469	742	392	586	260	524	308	436	361	646	5.04999e-05	0.909201	0.000539585
PEMT	254	142	182	31	286	131	217	127	330	107	394	190	5.05982e-05	0.910969	0.000540314
PDE11A	21	31	3	7	12	38	31	25	13	36	19	34	5.08694e-05	0.915853	0.000542889
KDELC2	881	549	1054	872	681	691	670	486	693	573	1142	804	5.14588e-05	0.926465	0.000548853
ARHGEF12	2994	2452	3648	3002	1771	2141	1963	1513	1203	1999	3365	3283	5.1558e-05	0.92825	0.000549586
DOCK11	193	264	248	268	104	207	116	169	80	179	199	304	5.1931e-05	0.934966	0.000553234
BIRC2	869	1109	925	1536	597	1134	574	881	481	954	955	1705	5.19682e-05	0.935635	0.000553303
BPGM	309	188	214	97	319	275	352	239	251	207	490	341	5.23433e-05	0.942389	0.000556967
RNF219	547	316	624	515	397	447	379	323	335	300	593	481	5.26836e-05	0.948515	0.000560257
SRR	140	72	196	189	98	135	119	124	137	120	131	174	5.30409e-05	0.954948	0.000563724
GPAM	1158	606	584	237	813	696	1001	483	589	571	1298	995	5.32274e-05	0.958305	0.000565372
CENPC1	229	182	299	294	141	279	189	209	100	177	256	301	5.38589e-05	0.969676	0.000571743
PRMT3	402	221	639	263	374	186	407	207	291	174	512	241	5.42079e-05	0.975959	0.000575109
CMTM4	2542	1608	1019	715	1831	1353	2026	1283	1209	1321	2736	2050	5.44466e-05	0.980256	0.000577301
SMC4	3343	1168	4722	2760	2514	2869	2527	1767	1647	1492	4046	2210	5.51749e-05	0.993369	0.000584679
ACTR5	261	175	433	226	242	197	192	150	214	162	338	258	5.61327e-05	1	0.000594237
MOCOS	310	243	574	379	316	409	273	271	350	299	415	413	5.61429e-05	1	0.000594237
TASP1	170	112	243	151	132	63	141	113	129	77	200	136	5.63568e-05	1	0.00059615
ADPRH	10	12	106	163	0	7	44	61	42	79	26	42	5.68428e-05	1	0.000600938
B3GNT1	399	238	255	89	364	328	299	219	264	184	536	336	5.70207e-05	1	0.000602112
COL4A3BP	971	863	1316	905	757	746	722	586	516	719	1081	1142	5.70175e-05	1	0.000602112
DACT3	107	245	24	121	82	282	45	186	64	194	95	261	5.72843e-05	1	0.000604541
DAPK3	677	1075	935	1458	617	1019	447	1082	698	858	867	1671	5.75673e-05	1	0.000607172
MIDN	577	491	341	182	441	778	378	472	525	459	660	619	5.76166e-05	1	0.000607336
ARPC5	1343	1271	1480	2150	1149	1677	1119	1268	1087	1068	1719	1992	5.78019e-05	1	0.000608932
NREP	54	11	1	3	35	19	47	7	26	7	32	11	5.7917e-05	1	0.000609788
APOBEC3D	12	32	3	4	4	46	11	56	3	39	9	54	5.80919e-05	1	0.000610946
TPPP	259	355	107	135	143	320	155	247	138	272	253	422	5.80949e-05	1	0.000610946
METTL1	147	103	252	148	160	105	110	98	153	103	166	116	5.82127e-05	1	0.000611828
TOM1	272	465	160	201	220	458	222	382	275	385	333	665	5.82735e-05	1	0.00061211
CBFB	1209	795	1584	1215	1079	859	1160	810	1000	731	1733	1178	5.86233e-05	1	0.000615425
EPHB6	4	74	1	13	3	77	1	56	6	67	9	84	5.89754e-05	1	0.000618761
DIDO1	1321	1297	1788	1663	1142	1415	1014	1143	869	1170	1689	1913	5.92188e-05	1	0.000620952
TIGD1	80	107	150	162	78	157	46	93	91	80	121	160	5.95927e-05	1	0.000624509
RPE	800	630	997	834	692	549	680	522	484	482	1118	880	5.97995e-05	1	0.000626312
POLR3D	422	379	618	612	413	407	372	388	419	435	588	642	6.06879e-05	1	0.000635248
LLGL2	758	523	336	305	572	454	700	508	641	429	1017	667	6.1048e-05	1	0.000638645
MFSD6	358	498	243	171	297	453	302	373	268	514	417	618	6.14757e-05	1	0.000642746
ESAM	123	100	29	75	119	144	98	146	90	76	144	183	6.1863e-05	1	0.00064642
LAMA5	1534	1437	782	616	1088	1287	1037	968	1127	927	1693	1728	6.20229e-05	1	0.000647715
XYLT1	6	22	0	2	2	33	5	10	7	18	14	28	6.25851e-05	1	0.000653207
CTAGE4	80	108	11	63	73	132	55	159	126	109	119	177	6.26821e-05	1	0.000653541
CYP2J2	0	1	8	7	0	2	0	0	0	1	0	1	6.26897e-05	1	0.000653541
PLAGL2	1032	584	1496	764	828	691	907	589	676	500	1272	991	6.28153e-05	1	0.000654471
ATL3	801	592	1121	854	620	802	625	551	604	680	957	1001	6.30058e-05	1	0.000656077
ZNF214	43	21	79	43	20	43	30	24	20	21	40	30	6.31928e-05	1	0.000657643
NCKAP1	5436	3381	6056	3829	3216	2328	3901	2449	2859	2563	5873	4103	6.35025e-05	1	0.000660485
PSME4	2879	2552	3574	2852	2091	2087	2245	1796	1730	2057	3395	3402	6.35703e-05	1	0.000660808
CHCHD8	624	506	1000	701	834	504	558	419	706	365	933	593	6.40326e-05	1	0.000665229
SLC12A7	1023	1569	759	674	885	1727	886	1671	976	1344	1346	2174	6.4748e-05	1	0.000672274
CSTF1	661	516	923	856	619	792	580	626	532	549	843	813	6.50548e-05	1	0.00067507
INPPL1	1282	1535	1760	1733	889	1542	884	1459	943	1294	1458	2003	6.59045e-05	1	0.000683494
PDE4B	23	17	237	155	6	15	2	5	0	6	195	84	6.59881e-05	1	0.000683966
SYN1	0	5	16	4	0	5	0	2	0	4	0	2	6.62532e-05	1	0.000686319
CACNG7	57	51	0	1	6	37	15	46	21	40	9	12	6.63798e-05	1	0.000687235
RABEP2	126	225	285	255	107	248	115	244	175	192	166	324	6.64552e-05	1	0.00068762
OSBPL8	2176	1700	3255	1821	1443	1598	1510	1022	729	1415	2253	2048	6.65644e-05	1	0.000688355
IDH3B	978	945	1434	1194	750	926	764	918	924	771	1425	1392	6.66633e-05	1	0.000688981
PIGW	340	228	485	375	395	291	294	218	290	217	432	362	6.67182e-05	1	0.000689153
CYB5R1	541	797	343	392	428	1000	398	802	495	822	648	1314	6.67756e-05	1	0.000689351
MKI67	10395	3572	11135	9997	6069	8776	7570	5233	5596	4835	11829	7671	6.69083e-05	1	0.000690325
MAST2	1082	974	1352	1228	900	689	903	794	887	818	1353	1251	6.69954e-05	1	0.000690828
C5orf62	315	387	173	198	244	551	231	388	219	373	436	609	6.7604e-05	1	0.000696405
HSPA13	1204	983	517	510	884	1618	669	1018	620	1340	1237	1795	6.76137e-05	1	0.000696405
PLD6	602	721	454	328	698	869	463	700	624	807	739	1062	6.77802e-05	1	0.000697721
PSMF1	1401	1169	1898	1524	1331	941	1163	1069	1415	952	1832	1554	6.80348e-05	1	0.000699943
CABP1	30	44	8	12	30	33	18	54	23	35	49	61	6.94121e-05	1	0.000713704
ETV7	0	2	12	10	0	5	0	2	0	10	1	4	6.9456e-05	1	0.000713748
NKX2-5	232	498	127	116	241	938	206	560	271	482	311	736	6.96069e-05	1	0.00071489
EMC2	599	486	889	570	501	483	438	424	453	431	784	621	6.97568e-05	1	0.00071563
KITLG	194	392	169	58	214	674	239	412	171	588	301	651	6.97584e-05	1	0.00071563
CHD4	5963	3997	6607	5061	4257	3837	4270	3364	3772	3216	6320	5425	7.03453e-05	1	0.00072124
ZNF30	89	127	58	23	79	147	59	91	63	100	92	173	7.1101e-05	1	0.000728573
SLC39A4	272	159	392	199	208	127	203	120	275	141	271	183	7.12537e-05	1	0.000729723
IFT140	368	272	229	86	233	221	301	237	264	245	427	345	7.13921e-05	1	0.000730724
ACAT1	2080	1578	1651	674	2107	1654	1948	1456	1919	1251	3326	2326	7.15639e-05	1	0.000732066
CYP24A1	450	56	0	0	78	14	59	4	181	9	501	77	7.17766e-05	1	0.000733825
DNAJB2	498	1104	329	503	401	1174	412	1034	509	917	642	1582	7.18949e-05	1	0.000734617
KLHL5	630	510	669	645	525	396	475	267	360	377	811	605	7.19528e-05	1	0.000734792
SMCR8	608	1117	1021	1121	453	1479	469	930	304	1199	688	1909	7.23952e-05	1	0.00073859
TMEM191B	36	32	7	12	19	55	32	21	31	35	46	56	7.24067e-05	1	0.00073859
SLC22A18	25	71	10	24	11	96	14	102	27	100	26	132	7.27046e-05	1	0.000741208
GLI4	74	125	49	31	57	111	56	117	86	146	72	184	7.33683e-05	1	0.000747328
ZNF195	710	1467	548	537	612	2090	509	1401	532	1425	773	2175	7.33879e-05	1	0.000747328
FAM101B	3	17	0	0	2	8	0	10	2	17	9	30	7.34991e-05	1	0.000747977
UBE2D2	1019	640	1298	931	854	588	863	654	986	564	1335	874	7.35347e-05	1	0.000747977
EXO1	1029	347	1210	1064	956	919	842	712	728	516	1262	818	7.3752e-05	1	0.000749764
TLR3	89	222	9	7	98	439	47	139	63	152	100	214	7.40864e-05	1	0.000752738
IQCC	41	64	130	63	32	32	27	40	46	59	82	100	7.4562e-05	1	0.000757143
PDCD11	2378	2019	2689	2308	2024	1398	1748	1469	1797	1443	2547	2114	7.46552e-05	1	0.000757662
HS3ST3B1	79	62	29	9	49	65	42	36	30	48	73	57	7.47458e-05	1	0.000758154
THSD4	65	109	20	32	33	81	53	75	37	82	63	120	7.54121e-05	1	0.000764482
KDM5C	1975	1747	2393	2110	1373	1426	1533	1475	1417	1515	2207	2286	7.59419e-05	1	0.000769419
APBB3	154	278	122	78	114	403	109	306	111	312	191	444	7.61844e-05	1	0.000771352
SPATA2	303	287	495	384	271	274	267	341	321	225	370	435	7.62184e-05	1	0.000771352
APMAP	1582	1474	2134	2079	1449	1595	1270	1524	1472	1361	2102	2044	7.63123e-05	1	0.000771869
CFD	131	88	37	27	161	133	122	95	191	81	137	99	7.67728e-05	1	0.000776091
CDCA7	1307	518	1379	907	1216	641	1017	538	969	513	1601	731	7.7972e-05	1	0.000787329
HDAC2	1337	664	2060	1068	1199	847	987	652	1550	790	1760	1019	7.79543e-05	1	0.000787329
MNX1	254	153	116	68	140	228	154	178	164	129	243	254	7.83835e-05	1	0.00079104
KIAA1199	13	18	31	48	11	31	8	15	4	23	18	39	7.86622e-05	1	0.000793408
ZNF238	327	231	158	134	273	306	303	250	206	222	430	367	7.93293e-05	1	0.000799689
IL15	5	15	0	3	7	32	10	19	7	10	18	34	7.95287e-05	1	0.000801251
PGPEP1	770	1615	362	819	552	1514	496	1389	465	1268	917	2264	7.97152e-05	1	0.000802231
RFWD2	449	313	634	365	329	245	365	241	394	241	564	380	7.97041e-05	1	0.000802231
TMEM14A	254	128	421	245	274	193	290	156	273	125	440	224	8.0791e-05	1	0.000812604
TRIM44	1766	1266	1922	1483	1195	969	1146	814	924	1137	1984	1646	8.10076e-05	1	0.000814328
BCAP29	954	971	1416	1299	896	1102	910	1015	719	959	1209	1394	8.15635e-05	1	0.000819458
AIFM2	834	921	520	537	831	1101	669	909	882	960	1211	1453	8.17752e-05	1	0.000820669
OSBPL2	755	929	1012	1105	613	861	414	674	385	501	867	1352	8.17385e-05	1	0.000820669
ZNF335	386	374	539	475	348	412	294	333	318	293	389	487	8.20064e-05	1	0.000822531
CBL	2381	2127	2830	2474	1208	1998	1510	1511	779	1797	2109	2718	8.2598e-05	1	0.000828004
C20orf20	771	463	1013	625	674	494	538	478	634	387	872	628	8.31084e-05	1	0.000832656
LOXL1	22	75	3	6	24	78	10	22	29	73	34	139	8.39447e-05	1	0.000840567
ACN9	214	180	430	202	246	150	201	138	223	161	350	221	8.53784e-05	1	0.000854449
ACHE	114	381	45	141	63	389	50	346	56	292	93	432	8.57014e-05	1	0.000857205
C20orf43	1059	873	1613	1126	1005	971	891	843	996	737	1445	1306	8.70237e-05	1	0.000869947
TMCC3	0	2	18	5	1	6	0	7	0	4	0	12	8.71624e-05	1	0.00087085
CEBPA	303	311	132	107	297	573	202	350	271	308	293	414	8.73038e-05	1	0.000871779
C11orf63	61	50	12	20	37	75	28	39	41	51	50	64	8.77533e-05	1	0.000875781
CCDC154	18	39	2	11	20	34	9	24	19	36	34	56	8.78823e-05	1	0.00087632
SH3BGRL3	1109	1642	1742	1572	918	1537	605	1137	985	1059	1418	2273	8.79046e-05	1	0.00087632
GTF2H2C	471	372	720	465	510	336	453	282	379	373	599	445	8.86659e-05	1	0.000883421
HELLS	983	406	920	1037	760	656	806	535	409	404	1182	705	8.87401e-05	1	0.000883671
FST	1	19	0	0	5	21	1	11	2	17	1	16	8.8947e-05	1	0.000885242
FBXO11	1019	807	1482	774	707	770	718	648	572	659	1158	1046	8.94884e-05	1	0.000890138
ARL4C	160	163	7	10	39	130	46	57	46	88	83	104	9.12037e-05	1	0.000906698
ITGB3BP	303	92	439	228	289	177	320	165	301	131	432	170	9.20709e-05	1	0.000914815
TRIM4	520	547	301	226	329	684	386	591	325	545	447	685	9.31599e-05	1	0.000925125
ASPH	4432	2841	4960	3456	3874	2020	3581	1777	3220	2144	6563	3292	9.4014e-05	1	0.000933092
CYP39A1	40	19	16	4	31	38	52	16	51	23	61	28	9.45897e-05	1	0.000938288
CIT	1447	410	1169	1019	800	739	1019	582	809	492	1581	735	9.67729e-05	1	0.000959416
CCDC116	19	10	3	0	12	13	11	12	15	17	17	15	9.69955e-05	1	0.000961094
BLVRB	557	941	357	454	416	1065	420	996	537	901	743	1235	9.70761e-05	1	0.000961363
XIAP	810	885	1016	937	600	879	538	706	339	802	706	1175	9.75699e-05	1	0.000965722
IFI6	38	81	5	41	39	171	29	115	44	88	60	132	9.78351e-05	1	0.000967815
MC1R	58	144	26	30	29	106	37	99	33	93	52	197	9.80388e-05	1	0.000969297
POU5F1B	0	2	9	15	0	3	1	4	1	7	1	3	9.85925e-05	1	0.000974236
RIMKLA	269	85	82	41	160	107	196	61	144	71	264	82	9.87658e-05	1	0.000975414
BAIAP2	377	473	307	177	364	542	331	460	379	438	509	708	9.92031e-05	1	0.000979196
TIPIN	425	160	420	326	381	214	304	189	316	142	518	235	9.93761e-05	1	0.000980366
AGPAT4	84	72	18	18	21	56	66	66	64	77	70	86	9.96905e-05	1	0.000982833
FAM171B	617	713	256	222	344	795	357	553	189	762	653	1232	9.97354e-05	1	0.000982833
CCDC144A	16	22	1	0	2	26	2	10	0	23	15	28	0.000100356	1	0.000988405
STYK1	20	40	5	14	33	54	49	57	32	58	31	51	0.000101202	1	0.00099619
CCDC50	797	1028	1064	1459	646	1132	659	1005	597	1157	1016	1605	0.000101349	1	0.000997097
FDFT1	1506	772	1735	1568	930	802	1584	836	821	612	1831	1176	0.000101737	1	0.00100037
RPGRIP1L	140	68	203	128	134	68	115	77	114	78	178	108	0.000102356	1	0.0010059
NUP210L	7	19	2	3	9	44	8	24	9	22	13	42	0.000102432	1	0.0010061
VASH2	284	117	111	44	148	171	225	92	156	110	307	163	0.000103012	1	0.00101124
C19orf59	2	134	0	5	2	142	1	208	7	297	3	349	0.000103586	1	0.00101632
KIAA0513	267	559	166	217	210	547	182	527	192	497	279	848	0.000104193	1	0.00102173
MORN2	93	45	163	74	78	63	70	42	85	37	112	66	0.000104431	1	0.0010235
GRAMD3	0	1	8	9	0	2	0	3	0	4	0	2	0.000104573	1	0.00102434
TRIP4	230	264	355	336	198	259	170	227	240	222	263	382	0.000104932	1	0.0010273
SMG1	4284	3907	6243	4127	2569	3691	2906	2178	1430	3279	4321	4939	0.000105118	1	0.00102856
GNPNAT1	1477	1037	2045	1443	1592	1075	1217	1041	1175	962	2012	1570	0.00010537	1	0.00103046
CEP68	498	437	262	207	377	679	353	475	276	487	440	613	0.000105438	1	0.00103057
SMC3	2029	1151	2681	1343	1461	1492	1428	908	1200	943	2422	1706	0.000106048	1	0.00103596
LOC100996254	0	1	9	4	0	0	0	0	0	1	0	0	0.000106156	1	0.00103646
IPO8	1991	1405	2629	1521	1614	1310	1591	1160	1032	1088	2295	1849	0.000107397	1	0.00104801
MYLIP	361	299	164	76	177	397	162	241	161	265	351	389	0.00010754	1	0.00104814
NUMA1	2399	2168	1934	898	1913	2551	2065	2528	1905	2396	3009	3463	0.000107585	1	0.00104814
ZNF107	577	283	736	527	403	562	400	324	274	326	655	539	0.00010748	1	0.00104814
ICK	605	500	357	159	362	519	525	412	351	625	797	809	0.000107667	1	0.00104837
BBS1	305	529	201	252	266	573	251	558	287	582	381	789	0.000108288	1	0.00105216
FKBP3	888	537	1170	857	797	691	770	617	769	479	1248	863	0.00010829	1	0.00105216
MYB	450	67	167	48	352	118	348	85	246	64	568	143	0.000108188	1	0.00105216
PPP1R16A	488	517	903	720	398	484	474	660	594	459	554	696	0.000108193	1	0.00105216
TBC1D16	260	238	321	295	150	268	132	195	141	221	274	328	0.000110694	1	0.00107493
TYMS	1891	719	2294	1430	1989	850	1807	748	1897	1127	3133	1162	0.000110801	1	0.0010754
MTPN	2670	2079	3334	2710	2205	2078	2093	1901	1474	2136	3236	3212	0.000111512	1	0.00108172
TNFRSF10D	737	2050	1605	1845	889	1965	711	1760	691	1705	1223	2801	0.000111948	1	0.00108536
KNTC1	1064	337	1003	716	575	489	729	335	438	363	1016	515	0.000112644	1	0.00109152
CDK5R1	304	211	157	103	269	270	184	238	199	233	321	304	0.000113076	1	0.00109511
DENND4A	564	589	738	576	390	490	369	364	219	441	532	685	0.000114153	1	0.00110495
HAUS2	941	642	1202	912	818	752	765	618	651	586	1228	951	0.000115515	1	0.00111754
CD55	852	762	325	460	775	703	567	618	703	904	889	980	0.000115663	1	0.00111837
TTPAL	548	1311	916	1157	455	1096	379	1057	369	1001	662	1977	0.00011614	1	0.00112237
TARSL2	300	233	182	87	229	242	232	186	229	221	379	300	0.000116667	1	0.00112686
MEPCE	895	1047	1803	1552	1012	1610	884	1395	1181	1117	1230	1696	0.000117114	1	0.00113057
C14orf169	247	163	434	244	266	227	226	199	262	183	303	214	0.000117365	1	0.00113239
MNAT1	433	186	507	322	369	168	364	195	378	184	634	264	0.000117466	1	0.00113275
ACTR2	5265	4360	7377	6638	4126	4420	1996	1941	1539	1934	5574	5146	0.000117726	1	0.00113466
IFNAR2	324	262	425	361	258	269	245	239	239	251	325	395	0.00011786	1	0.00113509
MAFF	427	837	413	1216	279	743	265	747	330	715	434	1163	0.000117948	1	0.00113509
PHKB	1035	543	607	255	826	611	826	428	605	523	1375	755	0.00011796	1	0.00113509
ASF1A	619	377	395	220	617	583	513	403	487	387	900	701	0.000118737	1	0.00114196
RGL2	501	416	605	558	307	389	364	440	326	306	621	656	0.00011889	1	0.00114282
SLC16A2	227	163	397	136	140	173	134	102	129	119	300	214	0.000119213	1	0.00114531
POMZP3	178	266	173	88	211	401	155	355	173	271	269	450	0.00011971	1	0.00114947
FASTKD5	282	509	622	649	370	584	313	491	202	290	496	819	0.000121509	1	0.00116613
RPS6KA5	206	116	72	51	149	128	126	105	94	84	188	147	0.000121606	1	0.00116643
ATRN	1230	1104	1545	1010	847	914	676	629	669	850	1194	1264	0.00012186	1	0.00116824
IRS2	228	357	79	107	143	588	122	277	130	390	213	507	0.000122179	1	0.00117068
CXCL1	0	0	2	13	0	1	0	1	0	2	0	0	0.00012344	1	0.00118214
SORL1	2	41	0	6	4	28	2	42	3	50	3	65	0.000123707	1	0.00118406
TRPC1	4	16	13	31	1	14	4	10	0	12	2	18	0.000123903	1	0.00118468
ZNF426	36	27	3	1	15	15	9	13	17	19	13	24	0.00012388	1	0.00118468
SH3GLB1	1169	951	1466	1341	894	1193	886	958	847	983	1337	1402	0.000124161	1	0.00118652
GIPR	30	128	12	27	17	97	23	101	9	97	29	126	0.000124301	1	0.00118722
PRX	121	69	37	40	58	111	72	85	70	78	128	145	0.000124554	1	0.00118901
SPTBN5	4	23	0	3	8	14	7	25	4	18	13	36	0.000125102	1	0.00119361
PEX6	156	245	214	376	124	224	146	246	119	189	295	359	0.000125478	1	0.00119656
RFC2	928	305	796	757	827	481	746	458	852	312	1304	509	0.000127381	1	0.00121407
PCDHGA1	63	138	32	20	46	154	56	110	67	190	60	161	0.000128225	1	0.00122146
TDRKH	194	147	240	162	96	122	74	106	91	97	109	121	0.00012833	1	0.00122182
ARF3	3057	2811	3583	3727	2334	2809	2463	2682	2027	2239	3732	4213	0.000128811	1	0.00122575
GNG12	1810	1485	2412	1896	1879	1547	1441	1056	1192	1338	2647	2190	0.000130193	1	0.00123825
NMB	370	362	176	171	327	766	456	670	446	434	505	800	0.000130433	1	0.00123987
TMOD2	637	709	300	276	463	603	466	483	292	524	695	772	0.000130841	1	0.00124309
EML6	119	132	191	116	43	143	53	121	55	128	107	165	0.000131824	1	0.00125177
STX16	984	1251	1566	1166	688	1282	712	1249	579	1192	1044	1884	0.000133349	1	0.00126492
TNNT1	534	350	450	559	353	266	374	365	441	272	510	370	0.000133327	1	0.00126492
SEMA3G	28	36	0	0	2	10	18	59	56	97	29	44	0.000133692	1	0.0012675
RCAN2	2	17	0	0	2	11	2	6	3	12	9	20	0.000134239	1	0.00127202
DENND5A	1187	1080	1230	1514	962	959	786	917	755	958	1487	1486	0.000135062	1	0.00127915
PIAS1	476	337	536	400	287	271	344	270	249	273	446	435	0.000136563	1	0.001292
PIGQ	478	528	282	174	234	596	418	677	451	441	681	953	0.000136505	1	0.001292
RPL7	52321	35953	41101	20322	54881	47552	48087	37847	61406	35800	82891	57992	0.00013748	1	0.0013
PRSS16	82	112	37	48	63	81	104	107	89	112	128	139	0.000137755	1	0.00130191
PEPD	627	715	602	174	593	660	478	519	630	533	868	938	0.000138408	1	0.0013074
LACC1	56	400	147	279	19	666	12	353	24	416	48	643	0.000140711	1	0.00132845
BCL11B	19	19	5	1	12	31	12	26	13	18	17	23	0.00014456	1	0.00136408
POLR3H	591	460	1111	508	655	467	526	435	691	374	863	613	0.000145692	1	0.00137404
CDKL2	0	3	15	9	0	10	0	7	0	5	2	13	0.000146564	1	0.00138154
DNAJB14	387	407	496	510	217	540	228	297	97	343	308	558	0.000147054	1	0.00138543
CLU	2108	1843	544	1282	2554	2949	2417	2585	3671	2506	3739	2954	0.000147183	1	0.00138592
ZBTB47	106	134	169	173	87	86	78	92	115	114	137	199	0.000147883	1	0.00139179
FGFR4	594	289	183	159	438	213	371	195	410	176	622	316	0.000148037	1	0.00139251
PPA2	510	207	890	291	566	288	503	149	598	169	650	239	0.000148315	1	0.00139439
SH3RF3 (NC_000002 109745496..110107895)	54	38	16	6	31	18	34	23	27	28	68	47	0.000148479	1	0.0013952
ERO1LB	414	569	256	234	297	681	321	568	238	741	481	798	0.00014892	1	0.00139862
C4orf22	0	0	2	9	0	0	0	0	0	1	0	0	0.000149854	1	0.00140666
CSF2RA (NC_000024 1337192..1379328)	5	12	0	0	3	30	2	27	7	36	1	19	0.00015038	1	0.00141086
NAA50	5434	3642	7021	4541	4674	3691	4423	3354	3995	3136	6814	5028	0.000151716	1	0.00142266
LRRC1	534	413	316	210	441	384	479	450	394	388	678	652	0.000152101	1	0.00142404
MCM6	3259	724	2614	1451	2851	1137	2031	763	2072	690	3765	1094	0.000152023	1	0.00142404
TSPYL2	499	1026	326	534	424	1434	358	1345	425	1139	532	1590	0.000151961	1	0.00142404
ERAP2	593	1275	242	470	516	2177	426	1030	375	1527	852	2254	0.000154019	1	0.00144125
SLC9A8	348	435	582	427	269	326	289	346	281	402	382	661	0.000154278	1	0.00144277
WNK4	84	177	38	91	77	207	59	256	108	240	123	360	0.000154342	1	0.00144277
ZFP91	2804	2075	1531	986	1976	2389	1941	1696	1354	1829	2998	2882	0.000155209	1	0.00145012
TMEM116	26	24	60	62	30	42	17	29	27	31	57	44	0.00015576	1	0.00145452
NOC4L	246	167	403	241	274	138	191	140	306	126	282	178	0.000155998	1	0.00145598
ZNF473	554	375	713	619	440	689	301	359	349	428	608	617	0.00015636	1	0.00145861
AOC2	75	129	56	43	61	157	65	161	57	154	123	253	0.000157291	1	0.00146652
ZNF490	276	404	169	138	160	516	157	414	172	383	253	552	0.000157645	1	0.00146907
YIF1B	234	218	417	314	219	269	208	236	273	215	409	330	0.000157851	1	0.00147023
SKIV2L2	1991	1028	2408	1130	1636	764	1663	759	1256	773	2283	1168	0.000158755	1	0.00147789
ACSF2	224	344	82	142	172	444	169	476	214	410	184	394	0.000158938	1	0.00147882
TM9SF3	3612	3069	4390	3651	2861	2903	2403	2215	2540	2780	4488	4318	0.00015916	1	0.00148012
ZNF75A	16	46	12	7	20	69	18	37	24	43	34	66	0.00015931	1	0.00148075
DPH1	748	1116	671	399	820	1205	603	936	775	971	1024	1554	0.000159438	1	0.00148117
DUSP4	80	75	49	14	39	70	65	86	61	79	103	102	0.000160117	1	0.00148595
MCMBP	2574	1061	2815	1714	2256	1370	2041	1138	1794	962	3185	1655	0.000160035	1	0.00148595
CSTF2T	523	390	755	481	453	440	345	352	443	341	680	531	0.000160483	1	0.00148858
DHCR24	6653	2387	7632	5012	4788	2571	6488	2262	3149	1032	9109	3745	0.000161732	1	0.00149939
PLEKHG2	948	978	899	1193	541	965	563	798	524	586	917	1217	0.000163801	1	0.00151702
QTRTD1	775	396	923	591	716	420	621	403	552	384	929	531	0.000163721	1	0.00151702
GTSE1	804	431	1191	1168	712	1143	700	781	691	650	1101	936	0.000164125	1	0.00151923
ALDH3B1	22	38	1	15	5	43	6	44	16	61	23	70	0.000164398	1	0.00152098
DNAJC6	649	911	341	467	465	876	565	804	472	1076	726	1192	0.00016499	1	0.00152567
UBA1	6104	5442	8194	6747	5057	5333	5022	5187	5637	4330	8128	7571	0.00016605	1	0.00153468
MYPN	0	3	5	21	0	6	0	7	0	9	0	11	0.000167594	1	0.00154816
KDM4B	321	447	268	138	313	367	283	432	287	373	407	580	0.000169377	1	0.00156383
DHRS4L2	70	80	154	135	87	98	64	91	110	83	71	96	0.000170833	1	0.00157646
MAGEB17	175	362	360	361	166	250	176	355	141	271	259	545	0.000171586	1	0.0015826
C17orf72	0	1	7	6	0	0	0	1	0	1	0	1	0.000172337	1	0.00158871
TICAM1	262	427	314	581	238	356	157	375	279	331	284	557	0.000172815	1	0.00159231
CD82	111	416	42	228	75	396	99	411	88	413	171	795	0.000173535	1	0.00159812
BBS10	317	321	443	333	199	392	198	264	123	321	318	456	0.000174443	1	0.00160527
TAF4	517	356	700	429	441	365	385	369	333	260	609	449	0.00017449	1	0.00160527
GATS	54	118	28	43	27	152	43	144	46	143	50	186	0.000175177	1	0.00161077
CTPS1	2578	1526	1107	945	2389	1338	2286	1243	2209	969	3381	1894	0.000175369	1	0.00161171
MYSM1	1139	1425	1660	1247	731	1512	844	1120	449	1341	1147	2025	0.000175666	1	0.00161362
SNAI2	118	57	0	0	4	32	11	27	1	47	59	68	0.000175987	1	0.00161574
POU2F2	11	35	20	74	8	28	8	19	11	34	18	52	0.00017655	1	0.00162008
ANK1	2	14	0	1	0	24	2	30	1	27	0	35	0.000176815	1	0.00162169
C20orf96	237	149	350	186	160	153	234	168	166	88	286	176	0.000178832	1	0.00163882
IRX2	250	237	166	92	239	341	175	228	205	199	260	350	0.000178865	1	0.00163882
NLRC5	255	293	159	112	312	482	214	271	232	256	346	413	0.000179152	1	0.00163994
SEC14L2	105	193	186	294	104	335	76	216	79	197	154	364	0.000179169	1	0.00163994
POLD4	120	315	189	410	94	329	71	348	106	325	139	522	0.000180131	1	0.0016479
UCHL5	1841	813	2036	1384	1665	1082	1577	924	1197	755	2450	1368	0.000181346	1	0.00165818
ARHGEF3	275	287	160	101	178	338	202	233	146	260	282	381	0.000181634	1	0.00165997
SLC39A11	184	135	142	25	169	113	134	81	173	109	232	168	0.000183451	1	0.00167573
C1orf151-NBL1	147	102	272	206	68	93	92	190	93	58	136	74	0.000183613	1	0.00167635
DEK	4748	1701	5439	3250	4008	2791	4188	2488	3592	1910	5938	3175	0.000183968	1	0.00167875
CSTF3	615	549	802	661	533	518	447	544	462	449	717	598	0.000186127	1	0.00169758
SASH1	423	489	240	149	254	576	312	335	208	411	398	580	0.000186513	1	0.00170024
DRAP1	1199	1067	1981	1056	978	938	842	1013	1233	810	1660	1406	0.000189037	1	0.00172238
URI1	860	543	1116	618	805	374	673	336	758	365	1243	701	0.000189241	1	0.00172337
PURB	1407	1422	2094	1302	1031	1573	1003	1114	682	1312	1571	1953	0.000190513	1	0.00173407
HHAT	32	157	30	15	12	170	15	138	29	130	36	199	0.000190755	1	0.0017354
SLC41A3	404	419	267	135	390	278	345	379	445	352	450	486	0.000192634	1	0.0017516
TP53I11	837	1409	412	811	502	1815	498	1324	602	1451	920	2012	0.000192809	1	0.00175232
UTP11L	2093	1270	1174	868	2365	1441	1710	1357	1967	1207	2884	2091	0.000192983	1	0.00175301
ARF6	1277	848	1690	1186	1063	1167	916	866	927	830	1607	1437	0.000195414	1	0.00177419
C8orf47	167	202	91	113	136	230	155	227	186	210	244	293	0.000195706	1	0.00177595
ACTR1B	615	780	434	333	556	642	529	691	520	550	941	1185	0.00019663	1	0.00178344
SIPA1	339	331	502	458	310	464	265	335	291	301	392	526	0.000197324	1	0.00178883
LOC730268	162	130	116	38	133	125	131	101	157	121	239	198	0.000197636	1	0.00179076
C1R (NC_000012 7240704..7245543)	8	5	0	0	2	9	5	6	10	20	17	27	0.000198169	1	0.0017938
SLC38A1	9299	5257	11587	5823	7688	5245	5945	3853	5068	4872	10596	7812	0.00019817	1	0.0017938
MLX	1246	1178	891	464	1191	1021	965	903	1104	899	1547	1446	0.000198854	1	0.00179908
GPNMB	45	160	2	8	58	468	44	154	45	169	63	212	0.000199738	1	0.00180617
CAMSAP2	1693	1581	2002	1683	1172	1390	1260	1000	739	1153	1806	1834	0.000200405	1	0.00181129
DHCR7	1552	695	460	380	1036	656	1528	717	968	477	2127	1118	0.000201002	1	0.00181578
PLCG1	2114	1745	2521	2144	851	1328	1472	1702	1321	1530	2047	2436	0.00020114	1	0.00181611
KBTBD8	228	336	391	479	211	505	186	334	177	415	313	733	0.000201994	1	0.00182291
BRF1	512	570	392	207	426	641	391	641	471	479	525	745	0.000202235	1	0.00182417
BIN1	648	510	410	287	534	727	518	577	615	516	786	786	0.000202932	1	0.00182953
FOXN2	748	827	1082	787	563	926	556	593	328	753	778	1176	0.000203704	1	0.00183558
[truncated: 1,659 more rows]

## Sheet: TableS4-p53 Codon 72 Dependent
Supplementary Table S4: TP53 Codon 72 Dependent Genes
	Pro1_C	Pro1_E	Pro2_C	Pro2_E	Arg1_C	Arg1_E	Arg2_C	Arg2_E	Pvalue	Bonferroni	BH
LAMB3	12	113	8	74	93	702	87	1283	0	0	0
SERPINE1	110	1434	126	1767	430	2807	725	4751	5.55112e-16	9.9093e-12	4.95465e-12
CCDC80	97	116	32	52	232	244	305	373	5.77316e-15	1.03057e-10	3.43522e-11
MYCT1	2	33	0	22	7	148	2	255	4.4682e-12	7.97619e-08	1.99405e-08
PRDM1	0	8	0	24	20	333	140	907	6.18694e-10	1.10443e-05	2.20886e-06
HR	30	85	30	103	7	14	12	39	2.04206e-09	3.64528e-05	6.07546e-06
CPA4	1	47	0	46	10	148	8	224	6.04924e-09	0.000107985	1.54264e-05
GREB1	5	101	0	94	2	289	3	476	2.77357e-08	0.00049511	6.18888e-05
CRIM1	952	967	619	636	1222	1247	1682	1897	3.29558e-06	0.0588294	0.0065366
MYLK	3	43	3	35	0	149	9	180	5.19888e-06	0.0928052	0.00824348
NEDD4L	1249	1356	1035	924	1556	1975	2062	3073	5.26937e-06	0.0940635	0.00824348
C11orf9	421	813	347	734	275	443	344	540	5.54153e-06	0.0989218	0.00824348
BIRC3	40	185	31	141	37	341	79	590	7.42942e-06	0.132623	0.0102017
MMP3	0	11	0	3	6	58	2	59	8.35212e-06	0.149094	0.0106495
MARCH4	2	12	0	6	10	44	6	51	1.56309e-05	0.279027	0.0186018
FLG	14	265	4	298	28	754	30	1595	2.07766e-05	0.370883	0.0224118
MVP	81	1157	101	1215	202	1320	305	2427	2.17972e-05	0.389102	0.0224118
SLCO1B3	84	129	76	131	146	197	227	321	2.25989e-05	0.403413	0.0224118
RGS4	6	3	2	5	11	21	33	32	3.07151e-05	0.548295	0.0288576
MYO7A	6	37	1	20	19	76	42	199	3.48229e-05	0.621624	0.0310812
LCE1C	0	10	0	6	0	40	0	84	3.76643e-05	0.672345	0.0320164
NME1-NME2	265	312	191	242	435	336	589	556	5.26479e-05	0.939818	0.042719

## Sheet: TableS5-Deep Sequencing
Supplementary Tables S5: Deep Sequencing
Gene	Pro2.E	Arg2.E	Raw P-value	FDR Adjusted P-value
PRDM1	137	4122	6.46508e-47	1.18324e-42
LAMB3	510	5631	7.66522e-30	7.01444e-26
MLLT11	6869	701	3.42845e-28	2.09158e-24
TNFRSF14	218	2530	8.31794e-27	3.80587e-23
TNS4	103	1496	4.54516e-26	1.66371e-22
ANKRD1	449	3854	6.98259e-24	2.12992e-20
FAM198B	891	5501	2.87389e-19	7.514e-16
MAP1B	2409	13388	1.12474e-18	2.57313e-15
MYCT1	129	1169	2.9171e-18	5.93209e-15
PDE7B	214	1496	1.44771e-16	2.64959e-13
MYO7A	112	821	9.2816e-14	1.54429e-10
HRNR	1977	8213	2.08022e-13	3.17269e-10
HDLBP	6406	25251	3.36351e-13	4.7353e-10
ODZ4	100	730	5.0444e-13	6.59447e-10
PDE4B	42	445	1.33054e-12	1.62344e-09
LETM2	348	1634	4.76287e-12	5.44813e-09
LAMA1	2469	9279	5.34842e-12	5.75805e-09
ATAT1	126	782	6.217e-12	6.3213e-09
KIF5C (NC_000002 149793295..149883773)	76	573	7.57684e-12	7.29849e-09
F2R	10	240	1.14547e-11	1.04822e-08
KIF17	274	1275	3.9158e-11	3.41271e-08
TRIM22	332	1467	5.10986e-11	4.25094e-08
NUAK2	209	1024	7.11943e-11	5.66521e-08
FLG	1947	6859	7.55371e-11	5.76033e-08
APOBEC3F	860	167	1.18276e-10	8.65873e-08
HR	734	134	1.61538e-10	1.1371e-07
CCDC80	385	1585	1.89457e-10	1.28424e-07
KCNQ5	32	320	5.03984e-10	3.29426e-07
TRPV6	499	83	1.96828e-09	1.24219e-06
CYP24A1	44	351	2.30929e-09	1.40882e-06
KRT17	25	264	4.17995e-09	2.46779e-06
ADAMTS16	36	305	6.683e-09	3.82226e-06
GFPT2	23	246	9.58901e-09	5.29929e-06
TIMP2	32	284	9.84459e-09	5.29929e-06
GPRC5A	2398	7036	1.84501e-08	9.64781e-06
KIAA1324	1318	3971	2.31347e-08	1.17614e-05
GREB1	730	2307	2.89608e-08	1.43254e-05
DCLK1	13923	38276	4.25061e-08	2.04723e-05
ODZ2	80	430	5.04766e-08	2.36877e-05
PDP1	4012	11052	7.03744e-08	3.21998e-05
SH2D5	476	1543	7.35669e-08	3.28395e-05
SLC2A3	6836	18508	8.44536e-08	3.68017e-05
RNASE7	82	418	1.39247e-07	5.92673e-05
SNX19	1080	3038	2.49993e-07	0.000103986
PSG4	17	186	2.58232e-07	0.000105026
C2orf54	110	482	3.64976e-07	0.000145213
BIRC3	1037	2834	5.92718e-07	0.000225998
PON3	441	99	5.83144e-07	0.000225998
MAN2A1	961	2628	6.94268e-07	0.000259316
NBEAL1	566	1624	9.22551e-07	0.000337691
LPCAT2	816	245	9.83346e-07	0.000352334
TRPV2	95	419	1.00106e-06	0.000352334
ETS1	1813	4651	1.15605e-06	0.000399207
SH3PXD2A	133	519	1.19159e-06	0.00040386
ASB1	3973	9802	1.49227e-06	0.000487706
PRKG1	335	68	1.48563e-06	0.000487706
GLRX	1221	3171	1.58914e-06	0.000510252
PLCXD2	508	1426	2.28946e-06	0.000722444
PTPRG	637	1724	2.68334e-06	0.00083238
EMP3	7199	2962	2.74506e-06	0.000837334
DST	4600	11039	2.80296e-06	0.000840979
BTNL9	9	128	3.08651e-06	0.000896657
PHLDB2	1018	2613	3.05066e-06	0.000896657
TRIM38	1487	3701	3.33413e-06	0.000953456
SCHIP1	198	657	3.46258e-06	0.000974957
MMP3	39	234	3.9375e-06	0.00109188
MUC19	830	2144	4.11168e-06	0.00112316
MAT1A	41	239	4.30033e-06	0.00115742
G0S2	116	434	7.1382e-06	0.00189338
PSG9	13	137	8.03453e-06	0.00210068
CPA4	333	937	1.05153e-05	0.00271058
EPCAM	18	151	1.33405e-05	0.00334463
TMEM40	31	194	1.3189e-05	0.00334463
LCE1F	263	763	1.47863e-05	0.00365702
PLK2	140	475	1.54474e-05	0.00376958
MARCH4	41	221	1.64605e-05	0.00396394
LOXL1	197	605	1.78348e-05	0.00423912
ZNF662	17	144	1.88524e-05	0.00442355
PLA2G4A	287	67	2.24584e-05	0.00520297
MAST1	1355	538	2.28142e-05	0.00521931
ASPA	178	28	2.32302e-05	0.00524888
NLRP3	32	189	2.55419e-05	0.00570083
CPS1	666	229	2.59791e-05	0.00572854
MYLK	281	780	2.76689e-05	0.00602854
AKAP12	3161	6932	3.18918e-05	0.00686686
CARD6	526	172	3.76507e-05	0.00801259
USP29	166	511	3.96306e-05	0.008337
TNFRSF21	4391	9446	4.10879e-05	0.00854535
AREGB	12	118	4.28007e-05	0.00880156
NEDD4L	6537	13922	4.40392e-05	0.00895562
ZFP28	86	322	4.51961e-05	0.00908987
ZFP82	12	117	4.78434e-05	0.00951772
LUM	21	147	5.23256e-05	0.0102974
AREG	31	177	5.35654e-05	0.0104293
ZNF460	642	1519	5.47575e-05	0.0105492
IFI16	399	1005	5.58348e-05	0.0106447
SEC14L4	663	240	5.77249e-05	0.0108916
TRIML2	1121	2508	6.14979e-05	0.0114851
DGKG	1309	2890	6.54353e-05	0.0120969
PROS1	2102	4505	7.35983e-05	0.01347
SEMA3C	63	256	7.88703e-05	0.0142919
BTN3A3	800	310	8.03319e-05	0.0144141
BAIAP3	1094	452	8.53329e-05	0.0151628
CBX5	13280	6423	8.64538e-05	0.0152142
EPG5	6736	13906	8.81017e-05	0.0153566
C10orf116	1119	467	9.51003e-05	0.0164201
AKR1B10	3874	1842	0.000124963	0.0213744
NAV2	2005	4199	0.000126343	0.0214104
SGMS2	2824	5820	0.000136573	0.0229317
IL18	32	168	0.000139436	0.0231996
EHHADH	1434	635	0.000145042	0.023915
KLF12	387	929	0.000156146	0.0252901
NETO2	8240	4060	0.000154812	0.0252901
SAMD4A	2673	5472	0.00016333	0.0262217
ZNF467	337	104	0.000168962	0.0268899
GCLM	2767	5628	0.000182829	0.0288461
CACNG7	262	72	0.000194677	0.030128
MT2A	764	1667	0.000197539	0.030128
RASAL1	87	296	0.000196342	0.030128
ROBO3	1094	475	0.000195542	0.030128
PSG3	14	109	0.000242334	0.0366545
FGD6	1390	2867	0.000250981	0.0376512
LPP	1994	4029	0.000267086	0.0396105
NPHS1	71	254	0.00026837	0.0396105
XK	1739	823	0.000323449	0.0473581
IL6ST	5925	11496	0.000344248	0.0500034
SERPINB7	43	184	0.000351407	0.0505137
TFAP2A	636	1371	0.000353282	0.0505137
MEIS3	3381	1685	0.000356445	0.050571
RASSF1	5568	2837	0.000374734	0.0527568
SH3TC2	30	150	0.000385577	0.0538689
HES6	4086	2068	0.00040632	0.055899
PLEKHA4	96	301	0.000407509	0.055899
TAGLN	7247	13905	0.000409271	0.055899
RGS4	24	133	0.00041751	0.056602
ZNF699	1423	2855	0.000422445	0.0568499
ARV1	368	840	0.000446759	0.0592094
KRT7	20	121	0.00044939	0.0592094
SERPINA1	7	79	0.000450063	0.0592094
SLC16A7	68	238	0.000452919	0.0592094
HEG1	2025	3975	0.000469641	0.0609601
CPVL	19	117	0.000499834	0.0644222
COL9A2	62	222	0.000526816	0.0674251
SLC7A11	822	1690	0.000542284	0.0689228
C11orf9	5085	2641	0.000571352	0.0716224
HBA1	317	107	0.000568541	0.0716224
NNMT	3242	6200	0.000583051	0.0725919
KLHDC7A	388	863	0.000608876	0.075295
IGFBP2	1315	628	0.000615497	0.0756028
ALCAM	1750	3407	0.000620091	0.0756593
TERT	354	127	0.000672593	0.0815219
MACF1	9305	17347	0.00069082	0.0831801
HLA-F	3049	1577	0.000774364	0.0926302
NR4A2	1225	589	0.000782219	0.0929622
DNAJC18	1353	2631	0.000805747	0.0944164
FA2H	303	104	0.000809932	0.0944164
HOMEZ	1476	726	0.000809799	0.0944164
ARC	1512	750	0.000892624	0.102561
RAI14	2986	5600	0.000885645	0.102561
RASGRP2	821	376	0.000896608	0.102561
CRIM1	4581	8490	0.000927224	0.105404
AHRR	459	970	0.000981071	0.110157
UTRN	2045	3861	0.000980669	0.110157
CLCN3	5044	9301	0.000989483	0.110424
NFATC4	750	341	0.00101297	0.11236
ADPRH	484	200	0.00105269	0.116062
C11orf45	45	1	0.00106141	0.116322
MLXIPL	2572	1344	0.00108756	0.118479
ANKRD36	974	1899	0.00111624	0.120884
SSR3	25517	46106	0.00113283	0.121959
GOLIM4	2085	3895	0.00117731	0.126007
EPAS1	1773	3328	0.00121285	0.12831
SH3BP5L	8252	14961	0.00120973	0.12831
PLIN5	606	268	0.00123354	0.129748
SGK196	845	1654	0.00125609	0.131366
ACTR2	13586	24427	0.00131466	0.136709
SSTR5	160	41	0.00135231	0.13983
ARAP2	1109	2116	0.0014016	0.144113
DGKH	691	1364	0.00146001	0.148451
LOC100507003	126	27	0.00145945	0.148451
SH3RF2	972	1864	0.00149525	0.151193
HIVEP2	2683	4901	0.00152639	0.153495
MGAT5B	143	363	0.00161182	0.1612
LMTK3	528	232	0.00167114	0.166224
HDAC9	206	479	0.00172327	0.170483
C2orf81	250	86	0.00177992	0.174204
OPHN1	840	1612	0.00177673	0.174204
ADAM9	3655	6562	0.00181739	0.175062
ASF1B	5771	3204	0.00180888	0.175062
SERPINE1	12206	21594	0.00179977	0.175062
CALD1	5588	9940	0.00187827	0.17998
GOLGA8B	10998	6216	0.00201697	0.192264
CUEDC2	3892	2150	0.00203378	0.192862
PVRL4	739	1421	0.00204693	0.193108
CLEC11A	2044	1096	0.00210492	0.196663
DNAJC12	1336	692	0.00210611	0.196663
CA2	6281	3533	0.00219584	0.204001
GAN	592	1156	0.00222952	0.205043
LNPEP	1765	3202	0.00222984	0.205043
TAS2R3	23	111	0.00224066	0.205043
ITGB1	28759	49967	0.00233511	0.212623
CKMT1B	10	75	0.00242683	0.21988
CDNF	418	179	0.00245259	0.22112
BLNK	338	136	0.00251494	0.225629
DOCK9	1563	2824	0.00261625	0.233574
MACC1	108	23	0.00289471	0.254749
NAB2	1560	2802	0.00289519	0.254749
STYK1	422	184	0.00288479	0.254749
ITGA7	3117	1748	0.0030145	0.26242
NAT1	298	117	0.00301071	0.26242
WASL	3596	6275	0.00302538	0.26242
SLAMF7	517	1002	0.0031332	0.27049
MGAM	89	244	0.00315623	0.271199
APOL6	59	185	0.00317289	0.271356
SH2D2A	971	500	0.00321457	0.273642
KRT81	30	123	0.00325001	0.274881
ZNF488	516	239	0.00325916	0.274881
CYBA	6579	3795	0.0033244	0.277822
HAPLN3	824	416	0.00331934	0.277822
C10orf88	467	911	0.00337888	0.281092
ALOXE3	594	1124	0.00362994	0.298449
CTGF	3619	6247	0.00363715	0.298449
NFKB1	2806	4871	0.00365275	0.298449
NFKBIZ	2242	3918	0.00364069	0.298449
MPRIP	9239	15732	0.00369697	0.300719
CYP4F3	73	209	0.00388396	0.312015
FOSB	3338	1907	0.00388697	0.312015
HSPG2	3513	6046	0.00386621	0.312015
REL	285	589	0.00393082	0.314156
SNTB2	2600	4500	0.00397472	0.316284
ZNF221	217	469	0.00408676	0.323792
HMMR	1530	840	0.00414925	0.325921
KLHL30	45	152	0.00414363	0.325921
SCNN1A	1210	651	0.00418541	0.327356
FRAS1	2506	4321	0.00430594	0.33535
ATP2B4	1986	3443	0.00444657	0.341776
DOPEY1	2675	4593	0.00448182	0.341776
IL22RA1	323	136	0.00442124	0.341776
MUC3A	620	306	0.00443021	0.341776
SMURF2	4068	6921	0.004474	0.341776
P4HB	20267	33962	0.00450514	0.342129
RBCK1	4770	2784	0.00456267	0.345066
PCNXL4	5279	8930	0.00459315	0.345942
B4GALT6	682	1254	0.00463449	0.347625
RHPN1	6228	3667	0.00475874	0.355487
ZNF223	419	808	0.00483787	0.359929
ACSF2	2928	1688	0.00486781	0.360691
NMU	987	526	0.00494634	0.365032
GPR56	182	401	0.00498664	0.365957
LMBRD2	672	1231	0.00499887	0.365957
BIRC6	7152	11987	0.00504288	0.366875
NUDT8	1297	712	0.0050515	0.366875
ABL2	28117	46694	0.00515787	0.37312
C1R (NC_000012 7187012..7189912)	27	110	0.00527437	0.378555
LYPD6	1320	2304	0.00525416	0.378555
SLC3A2	13584	8142	0.00533002	0.381055
DOCK5	4850	8128	0.0054793	0.390203
LGALS3BP	1164	2038	0.00554935	0.39366
MYO9A	1175	2054	0.00564254	0.397191
NAB1	1586	2733	0.00563513	0.397191
CLCA2	70	196	0.00566811	0.397463
IDH2	5648	3360	0.005809	0.404245
NLRP11	569	283	0.00578869	0.404245
PCDHAC2	58	7	0.00591273	0.409905
BOD1L1	4447	7423	0.00598189	0.41004
HERC5	25	104	0.00594534	0.41004
REEP6	657	336	0.00597221	0.41004
ODZ3	210	443	0.00604204	0.412617
ANKRD36C	570	1045	0.00616682	0.418019
C10orf12	951	1674	0.00615301	0.418019
HIPK2 (NC_000007 139415229..139478193)	643	1162	0.00646706	0.435148
UPP1	1717	2924	0.00645394	0.435148
CSMD3	698	1252	0.00651385	0.436691
LRBA	3408	5678	0.00667518	0.444987
ZNF780B	3287	5480	0.00668623	0.444987
SYNPO	233	478	0.00676966	0.448907
CBS	51	156	0.00686169	0.453367
ARSG	82	214	0.00706058	0.463164
TMSB4X	10604	6450	0.00705878	0.463164
TROAP	5735	3459	0.00718113	0.469389
TOR1AIP1	4229	6982	0.00724287	0.47174
OPRL1	580	296	0.00740971	0.480895
ASB13	2027	1182	0.00753246	0.487134
ASAP1	6409	10488	0.00761454	0.487874
C3orf72	160	54	0.00764621	0.487874
ERCC1	6497	3944	0.00765051	0.487874
IL3RA (NC_000023 1455008..1502082)	582	298	0.00763188	0.487874
ARPC4-TTLL3	1718	994	0.00776496	0.488365
KRCC1	603	311	0.00772987	0.488365
MLL	5905	9664	0.00772198	0.488365
PSMB9	583	299	0.00774449	0.488365
AHNAK2	2755	4565	0.00786131	0.49105
PADI3	39	130	0.00785316	0.49105
LYST	1392	2358	0.00802903	0.498126
VPS13C	7155	11659	0.00800271	0.498126
BDNF	808	1412	0.00808379	0.498844
KLRC2	49	5	0.00809511	0.498844
ASAP2	1247	2121	0.00817568	0.501639
MOSPD3	2287	1350	0.00819528	0.501639
CCDC88A	5221	8522	0.00826014	0.502249
MUTYH	820	445	0.00825014	0.502249
C2orf72	1350	772	0.00840112	0.50745
DGKI	38	127	0.00838648	0.50745
TNFAIP3	814	1415	0.00865865	0.521285
CORO2B	199	411	0.00884346	0.530665
NHS	328	150	0.00888267	0.531276
ALDH6A1	836	458	0.00897901	0.534209
ZNF292	3886	6338	0.00899008	0.534209
TTC37	1926	3195	0.00907772	0.537671
TMTC3	6700	10825	0.00926191	0.546811
CELSR1	352	165	0.00933059	0.54801
FAM160A1	756	1314	0.00937205	0.54801
TGM2	344	648	0.00936735	0.54801
HPX	452	225	0.00944286	0.550393
OPCML	121	276	0.00963033	0.559005
RNF169	4274	6928	0.0096517	0.559005
LCE1B	401	738	0.00985429	0.568937
ENTPD7	2876	4681	0.0102077	0.585646
ZNF425	878	489	0.0101995	0.585646
ATP6V0A4	251	491	0.0104297	0.596515
C1QTNF6	173	64	0.0105617	0.600073
TJP3	306	140	0.0105627	0.600073
ZNF217	2885	4684	0.0105903	0.600073
H1F0	15483	9707	0.010768	0.608257
PRRT4	2942	1790	0.010845	0.608851
PTH1R	107	30	0.0108396	0.608851
ACOT11	298	136	0.011031	0.614952
CORO1C	21154	33541	0.0111147	0.614952
ENPP5	104	243	0.0111217	0.614952
PXK	696	1203	0.0110736	0.614952
ZNF121	3512	5661	0.0110975	0.614952
FBF1	2214	1334	0.0112019	0.617519
ANKRD37	465	237	0.0112601	0.618865
HLA-C	91667	58006	0.0113241	0.620521
SPTLC2	5700	9106	0.0113595	0.6206
CUL4B	7429	11821	0.0115658	0.628122
EML2	2854	1742	0.0115351	0.628122
CCDC149	630	340	0.0117719	0.63087
DKK1	18	80	0.0117887	0.63087
HLA-B	29928	18932	0.0117179	0.63087
PLA2G2D	80	18	0.0117887	0.63087
ZNF860	561	297	0.0116833	0.63087
FAM134B	313	586	0.0118946	0.632834
SLC35B4	5339	8511	0.0118866	0.632834
ERBB2IP	7408	11761	0.0119797	0.635513
APBB2	1067	1779	0.0123306	0.652241
GNS	10610	16761	0.0123835	0.653149
LOC100129924	63	168	0.0125039	0.653846
PTAFR	398	720	0.0124385	0.653846
TRIO	5447	8653	0.0124862	0.653846
CLN5	2497	4023	0.01254	0.653864
LTBP2	1068	1778	0.0125859	0.654396
CNST	2748	4414	0.012662	0.654808
FER	393	711	0.0126654	0.654808
CREB5	2492	4007	0.0129239	0.657036
EFCAB4A	844	477	0.0127955	0.657036
HCFC1R1	970	1621	0.0128899	0.657036
MYO5B	1578	2575	0.0129139	0.657036
TBX1	393	196	0.0128505	0.657036
TMEM161A	3765	2337	0.0128843	0.657036
UPK3BL	2836	1745	0.0129674	0.65742
PIGZ	295	137	0.0130344	0.658992
ANKRD36B	540	942	0.0131312	0.660241
KLHL11	986	1644	0.0131277	0.660241
KLF6	5016	7944	0.0132905	0.666418
HMBOX1	524	915	0.0134542	0.672782
TBX19	138	295	0.0138253	0.689458
FRMD6	2934	4676	0.013909	0.691748
ETV5	10046	6382	0.0139511	0.691959
HYI	1664	2691	0.014282	0.692027
NFAT5	10803	16921	0.0140799	0.692027
PDGFRB	55	151	0.014266	0.692027
PTPRF	21679	33816	0.0142854	0.692027
RNF145	9388	14713	0.014162	0.692027
SDR39U1	1808	1097	0.0142053	0.692027
TEAD1	8678	13616	0.0140421	0.692027
TTLL3	2250	1381	0.0142928	0.692027
ZWINT	13904	8873	0.0142815	0.692027
MGLL	2314	3698	0.0145602	0.701265
PCDHGA10	32	107	0.0145316	0.701265
LYN	3291	5213	0.0146919	0.705751
SCN4B	57	154	0.0147909	0.708646
EGFR	1601	2585	0.0149164	0.712793
PCLO	160	329	0.0149615	0.713087
HHLA3	1378	826	0.0151644	0.720459
ZFP36L1	7009	10960	0.0151949	0.720459
SERPINB1	3053	4829	0.0153493	0.724027
TTBK2	972	1604	0.0153209	0.724027
PSD3	164	63	0.0154506	0.725068
RND3	4391	6898	0.0154284	0.725068
CD68	7688	11990	0.0156088	0.730083
CRISPLD2	204	399	0.0156372	0.730083
ARHGAP29	11469	17822	0.0157827	0.734999
FHOD1	4389	2775	0.0158414	0.73586
CD163L1	105	236	0.0159092	0.737141
PABPN1	5108	3242	0.0159592	0.737589
ITGA2	1012	1660	0.0161182	0.743062
LCOR	3324	5228	0.0162569	0.747573
EIF2C2	2941	4636	0.01632	0.747779
MLL3	7664	11916	0.0163431	0.747779
C14orf37	551	943	0.0164199	0.749419
FOXD1	1846	2945	0.0164647	0.749593
TG	57	152	0.0165139	0.749967
BRE	924	1520	0.0166551	0.752648
CHTF18	4767	3030	0.0166329	0.752648
ANKRD33B	3636	5694	0.0169009	0.761873
CYR61	11250	17398	0.0169812	0.763612
KIF18B	6268	4012	0.0170736	0.765883
APOBEC3D	434	228	0.0171341	0.766721
TMEM179B	3123	1968	0.0172418	0.769656
PLD3	5164	3304	0.0178353	0.794213
FAM72B	1300	789	0.0186401	0.828035
ALPK1	1055	630	0.0187347	0.828218
MSH4	246	459	0.0187045	0.828218
BHLHE40	4888	7564	0.0188072	0.829419
FAM72A	1165	702	0.0189	0.831511
CSF2RA (NC_000023 1387192..1429328)	186	78	0.0190564	0.83638
BCL2L12	3754	2397	0.0191911	0.840277
RBAK	2058	3234	0.0194138	0.847997
ZNF573	182	356	0.0194622	0.848088
RND1	666	380	0.0196042	0.852249
CSRP1	9120	13981	0.0197048	0.854591
ZCWPW1	333	168	0.0198223	0.857656
NCR3LG1	7162	10994	0.019884	0.858297
CORIN	94	212	0.0200057	0.859718
FAM64A	2283	1438	0.0200109	0.859718
ITGAV	7138	10949	0.0201081	0.859858
KIAA1683	44	125	0.0200658	0.859858
H2AFY2	2265	1428	0.0203462	0.865992
NPTXR	5372	3472	0.0203364	0.865992
KIAA1919	858	1396	0.0204659	0.869063
IQCC	269	491	0.0205836	0.872041
ARSA	4522	2916	0.0206708	0.87371
CITED2	1478	2337	0.0208353	0.877578
KIAA1109	6785	10386	0.0208582	0.877578
ZNF471	25	88	0.0209344	0.878764
GTPBP3	5390	3493	0.0210917	0.883341
TMEM144	797	1299	0.0212762	0.889035
ABCA12	809	1317	0.0213321	0.889341
MAGI1	931	1501	0.0216249	0.899496
APOL1	64	159	0.0219481	0.907809
INO80D	2757	4262	0.0219735	0.907809
MEST	3271	2101	0.0219053	0.907809
ZNF841	8266	12577	0.0221915	0.914749
ARMCX2	5	41	0.0223477	0.915589
FLG2	30	97	0.0223438	0.915589
MYBPC2	134	50	0.022412	0.915589
PGAP1	6533	9955	0.0223719	0.915589
ANKRD13A	7887	11990	0.0225863	0.917555
C1R (NC_000012 7240704..7245543)	44	123	0.0226606	0.917555
F8	558	930	0.0225671	0.917555
IL1RAP	486	820	0.0226467	0.917555
KIAA1211	1112	1768	0.0229071	0.923449
SAMD9	782	1269	0.0228639	0.923449
ATP13A3	19822	29933	0.0231611	0.929877
AURKB	5858	3828	0.0231929	0.929877
LAMC1	9553	14474	0.023219	0.929877
AMY2B	696	406	0.0233071	0.930493
FLT3LG	821	488	0.023336	0.930493
CXXC4	31	98	0.023852	0.949
CHM	2189	3382	0.0239521	0.950912
IGFBP6	2868	1849	0.0242807	0.961874
SUSD2	52	136	0.0244703	0.967292
AFF4	10704	16136	0.0246949	0.972338
NRBP2	4310	2813	0.0247042	0.972338
IL20RA	220	102	0.0248365	0.973822
RAD54L2	2025	3127	0.0248484	0.973822
GEM	308	542	0.0251311	0.982799
GPR137B	1520	2366	0.0253515	0.989301
SPDYE5	469	786	0.0255579	0.995236
LOC81691	3090	2005	0.0256196	0.995518
SYT7	1830	1164	0.0257736	0.999383
ZBTB41	1811	2798	0.0258296	0.999435
61E3.4	5127	6291	0.270951	1
A1BG	91	87	0.936103	1
A1CF	143	102	0.374531	1
A2LD1	107	81	0.516033	1
A2M	24	24	1	1
A2ML1	36	53	0.525812	1
A4GALT	12	8	0.804328	1
A4GNT	11	6	0.720758	1
AAAS	2651	2372	0.565996	1
AACS	2852	2801	0.926413	1
AADAC	6	1	0.58893	1
AADACL2	1	5	0.676683	1
AADACL3	9	7	0.927745	1
AADACL4	11	7	0.794961	1
AADAT	3395	2816	0.327477	1
AAGAB	7557	7449	0.93825	1
AAK1	5854	7379	0.210866	1
AAMP	13049	12251	0.729446	1
AANAT	30	37	0.783419	1
AAR2	4118	4160	0.95793	1
AARD	4	9	0.686281	1
AARS	10145	10484	0.857746	1
AARS2	5395	4346	0.24738	1
AARSD1	2250	2301	0.909982	1
AASDH	633	756	0.433498	1
AASDHPPT	8456	8468	0.99435	1
AASS	6760	7450	0.598642	1
AATF	5950	5979	0.979785	1
AATK	93	77	0.680033	1
ABAT	1854	1630	0.518993	1
ABCA10	154	109	0.349628	1
ABCA13	69	120	0.190067	1
ABCA3	7523	8424	0.538856	1
ABCA4	107	108	1	1
ABCA5	3219	4761	0.0382041	1
ABCA6	9	11	0.93447	1
ABCA7	7786	5679	0.0882246	1
ABCA8	38	46	0.775901	1
ABCA9	48	29	0.438526	1
ABCB1	53	55	0.97172	1
ABCB10	2741	2805	0.905688	1
ABCB11	41	45	0.904223	1
ABCB4	20	20	1	1
ABCB5	14	14	1	1
ABCB6	10815	8431	0.174509	1
ABCB7	2902	2881	0.971153	1
ABCB8	2706	2524	0.719068	1
ABCB9	1962	1605	0.312888	1
ABCC1	6802	7842	0.440514	1
ABCC10	3608	3331	0.674277	1
ABCC11	130	121	0.861881	1
ABCC12	13	15	0.943834	1
ABCC2	108	133	0.591826	1
ABCC3	46	38	0.775901	1
ABCC4	2180	3149	0.0567422	1
ABCC5	5756	6383	0.577278	1
ABCC6	460	355	0.308996	1
ABCC8	32	14	0.331463	1
ABCC9	50	65	0.630503	1
ABCD1	4754	4208	0.515406	1
ABCD2	23	27	0.873307	1
ABCD3	7122	7647	0.699917	1
ABCD4	4309	3928	0.623073	1
ABCE1	12453	13165	0.760555	1
ABCF1	8741	8980	0.883542	1
ABCF2	23261	22007	0.759663	1
ABCF3	6370	6103	0.81766	1
ABCG1	31	28	0.922181	1
ABCG2	634	757	0.434042	1
ABCG4	1962	1643	0.372214	1
ABCG5	12	8	0.804328	1
ABCG8	14	11	0.881782	1
ABHD1	25	53	0.241315	1
ABHD10	7173	7193	0.988548	1
ABHD11	1925	1327	0.0641656	1
ABHD12	3991	3618	0.603739	1
ABHD12B	44	36	0.770149	1
ABHD13	2513	2956	0.398932	1
ABHD14A	921	724	0.273292	1
ABHD14B	2246	2474	0.619542	1
ABHD15	3097	2706	0.481644	1
ABHD16A	3796	3426	0.588436	1
ABHD16B	1759	1620	0.681756	1
ABHD2	2995	3450	0.458055	1
ABHD3	4575	3600	0.203112	1
ABHD4	9605	9152	0.792427	1
ABHD5	2551	3328	0.165288	1
ABHD6	1810	1896	0.816402	1
ABHD8	980	867	0.5712	1
ABI1	8631	8637	0.997482	1
ABI2	3394	3955	0.418906	1
ABI3	10	5	0.70507	1
ABI3BP	71	108	0.333288	1
ABLIM1	5009	5266	0.788954	1
ABLIM2	142	102	0.385518	1
ABLIM3	20	19	1	1
ABP1	17	21	0.854959	1
ABR	7044	6661	0.762524	1
ABRA	13	11	0.939665	1
ABRACL	3267	3837	0.396244	1
ABT1	2674	2572	0.841397	1
ABTB1	1135	930	0.347792	1
ABTB2	3296	3216	0.898374	1
ACAA1	4176	4268	0.908539	1
ACAA2	4177	5431	0.160518	1
ACACA	3658	5000	0.0963725	1
ACACB	662	759	0.545544	1
ACAD10	944	817	0.506963	1
ACAD11	4997	4671	0.718555	1
ACAD8	4428	4119	0.700641	1
ACAD9	2556	2171	0.40112	1
ACADL	15	12	0.885929	1
ACADM	3124	3863	0.263087	1
ACADS	2836	2512	0.52933	1
ACADSB	3412	3575	0.806443	1
ACADVL	29586	28367	0.815992	1
ACAN	44	29	0.53711	1
ACAP1	72	117	0.250579	1
ACAP2	7612	8466	0.563424	1
ACAP3	3719	3564	0.822829	1
ACAT1	10028	10663	0.737412	1
ACAT2	8596	7099	0.298783	1
ACBD3	14810	15167	0.89604	1
ACBD4	701	693	0.964326	1
ACBD5	7546	7756	0.881973	1
ACBD6	1627	1483	0.646956	1
ACBD7	3099	2591	0.351023	1
ACCS	675	579	0.507715	1
ACCSL	18	16	0.948786	1
ACD	3600	2535	0.0667441	1
ACE	1533	1127	0.133896	1
ACE2	58	37	0.442647	1
ACER1	25	27	0.958468	1
ACER3	1961	2338	0.369269	1
ACHE	2743	1959	0.0837138	1
ACIN1	14057	13014	0.672245	1
ACLY	24950	23069	0.665011	1
ACMSD	51	38	0.63527	1
ACN9	1080	1040	0.861025	1
ACO2	9352	8582	0.639798	1
ACOT1	131	70	0.127767	1
ACOT12	8	10	0.931343	1
ACOT13	2902	2886	0.97838	1
ACOT2	1418	1321	0.730585	1
ACOT4	10	8	0.931343	1
ACOT6	7	3	0.737119	1
ACOT7	4747	4708	0.965671	1
ACOT8	852	764	0.622555	1
ACOT9	3633	3843	0.766903	1
ACOX1	9964	10760	0.674614	1
ACOX2	12	12	1	1
ACOX3	1214	1378	0.538981	1
ACOXL	15	16	1	1
ACP1	7462	6734	0.578241	1
ACP2	1723	1780	0.872094	1
ACP5	43	91	0.128433	1
ACP6	1430	1301	0.645206	1
ACPL2	1752	1634	0.72861	1
ACPP	11	9	0.93447	1
ACPT	15	20	0.799469	1
ACR	21	8	0.387072	1
ACRBP	145	156	0.846064	1
ACRC	229	157	0.237152	1
ACRV1	92	99	0.877725	1
ACSBG1	86	86	1	1
ACSBG2	76	62	0.68703	1
ACSF3	775	691	0.610614	1
ACSL1	7352	7633	0.839123	1
ACSL3	5267	5883	0.552116	1
ACSL4	7867	8932	0.489787	1
ACSL5	111	200	0.0883794	1
ACSL6	96	69	0.46533	1
ACSM1	13	9	0.812544	1
ACSM2A	8	7	1	1
ACSM2B	7	5	0.91856	1
ACSM3	74	44	0.321005	1
ACSM4	18	27	0.65199	1
ACSM5	31	14	0.356603	1
ACSS1	7	13	0.676944	1
ACSS2	2386	2804	0.403292	1
ACSS3	23	26	0.914514	1
ACTA1	117	104	0.777826	1
ACTA2	1694	1415	0.372446	1
ACTB	107086	99924	0.700276	1
ACTBL2	14	47	0.10062	1
ACTC1	8	10	0.931343	1
ACTG1	129277	131827	0.913481	1
ACTG2	16	22	0.760064	1
ACTL10	32	14	0.331463	1
ACTL6A	4685	4294	0.642361	1
ACTL6B	14	13	1	1
ACTL8	48	46	0.969503	1
ACTL9	2	3	1	1
ACTN1	16266	17928	0.592231	1
ACTN2	32	39	0.789749	1
ACTN4	16789	16723	0.982951	1
ACTR10	4251	4205	0.954759	1
ACTR1A	12399	13331	0.691079	1
ACTR1B	4635	5302	0.471608	1
ACTR3	15561	16514	0.743745	1
ACTR3B	1733	1429	0.338206	1
ACTR3C	129	108	0.65189	1
ACTR5	1271	1109	0.512984	1
ACTR6	3375	3089	0.642514	1
ACTR8	2300	2642	0.474565	1
ACTRT1	2	5	0.799682	1
ACTRT2	3	1	0.882021	1
ACTRT3	422	264	0.0783797	1
ACVR1	1397	1617	0.470308	1
ACVR1B	3402	3091	0.615096	1
ACVR1C	86	74	0.754259	1
ACVR2A	1175	1279	0.68389	1
ACVR2B	2496	3423	0.0993367	1
ACVRL1	4	11	0.562006	1
ACY1	3639	2636	0.091364	1
ACY3	82	38	0.138538	1
ACYP1	677	606	0.632052	1
ACYP2	188	177	0.863873	1
ADA	2030	1609	0.241956	1
ADAD1	7	5	0.91856	1
ADAD2	7	10	0.859451	1
ADAL	14	23	0.618299	1
ADAM10	4239	6095	0.0518682	1
ADAM11	261	230	0.673261	1
ADAM12	16	35	0.330229	1
ADAM15	11406	9355	0.278849	1
ADAM17	3194	4194	0.150093	1
ADAM18	5	5	1	1
ADAM19	44	35	0.736614	1
ADAM2	8	4	0.756112	1
ADAM20	16	14	0.945632	1
ADAM21	76	81	0.908467	1
ADAM22	1019	1154	0.555666	1
ADAM23	25	27	0.958468	1
ADAM28	10	7	0.859451	1
ADAM29	13	18	0.787568	1
ADAM30	0	1	1	1
ADAM32	13	16	0.889687	1
ADAM33	13	12	1	1
ADAM7	11	7	0.794961	1
ADAM8	259	380	0.158309	1
ADAMDEC1	5	6	1	1
ADAMTS1	6	8	0.923546	1
ADAMTS10	10	8	0.931343	1
ADAMTS12	15	17	0.947275	1
ADAMTS14	27	34	0.77287	1
ADAMTS15	9	13	0.812544	1
ADAMTS17	164	170	0.927648	1
ADAMTS18	23	27	0.873307	1
ADAMTS19	21	24	0.910807	1
ADAMTS2	72	74	0.9761	1
ADAMTS20	24	17	0.72379	1
ADAMTS3	49	59	0.749314	1
ADAMTS4	38	37	1	1
ADAMTS5	15	15	1	1
ADAMTS6	113	69	0.25078	1
ADAMTS7	31	21	0.637121	1
ADAMTS8	13	13	1	1
ADAMTS9	509	509	1	1
ADAMTSL3	38	37	1	1
ADAMTSL4	928	793	0.47172	1
ADAMTSL5	758	732	0.879798	1
ADAP1	1680	1484	0.538426	1
ADAP2	82	49	0.301644	1
ADAR	40640	46587	0.448897	1
ADARB1	2765	2896	0.810453	1
ADARB2	15	10	0.765186	1
ADAT1	2615	2804	0.717791	1
ADAT2	2306	2084	0.60518	1
ADAT3	10	9	1	1
ADC	484	382	0.345662	1
ADCK1	641	577	0.653166	1
ADCK2	3850	4045	0.793937	1
ADCK3	10429	8038	0.156009	1
ADCK4	1030	1250	0.355015	1
ADCK5	1635	1255	0.193233	1
ADCY1	57	75	0.588415	1
ADCY10	34	37	0.929276	1
ADCY2	13	20	0.693781	1
ADCY3	4647	5430	0.404142	1
ADCY4	13	8	0.745804	1
ADCY5	105	125	0.662512	1
ADCY6	9357	9205	0.929235	1
ADCY7	5269	4970	0.75454	1
ADCY8	57	27	0.226336	1
ADCY9	3081	3226	0.810357	1
ADCYAP1	5	4	1	1
ADCYAP1R1	23	23	1	1
ADD1	9943	9396	0.757683	1
ADD2	40	52	0.669553	1
ADD3	3519	3510	0.990402	1
ADGB	16	25	0.636258	1
ADH1A	7	9	0.927745	1
ADH1B	4	9	0.686281	1
ADH1C	9	7	0.927745	1
ADH4	14	9	0.756058	1
ADH5	14589	14383	0.937974	1
ADH6	44	36	0.770149	1
ADH7	11	7	0.794961	1
ADHFE1	524	423	0.383553	1
ADI1	4500	4246	0.757414	1
ADIG	4	4	1	1
ADIPOQ	27	23	0.873307	1
ADIPOR1	14498	14374	0.962634	1
ADIPOR2	8329	7369	0.506012	1
ADK	727	1018	0.12175	1
ADM	1917	2308	0.343892	1
ADM2	7	16	0.525815	1
ADNP	9594	10468	0.634082	1
ADNP2	8341	8554	0.891256	1
ADO	4098	3728	0.61623	1
ADORA1	889	1124	0.270531	1
ADORA2A	400	380	0.848227	1
ADORA2B	4949	4371	0.50718	1
ADORA3	15	12	0.885929	1
ADPGK	5047	5344	0.759472	1
ADPRHL1	385	374	0.918131	1
ADPRHL2	3679	3505	0.79885	1
ADPRM	996	1008	0.958666	1
ADRA1A	4	6	0.91251	1
ADRA1B	1	1	1	1
ADRA1D	5	6	1	1
ADRA2A	17	19	0.95018	1
ADRA2B	5	6	1	1
ADRA2C	990	672	0.077379	1
ADRB1	40	22	0.410557	1
ADRB2	10	13	0.87717	1
ADRB3	8	1	0.441746	1
ADRBK1	8407	7281	0.434838	1
ADRBK2	1078	1233	0.520851	1
ADRM1	10617	10866	0.899434	1
ADSL	6030	5593	0.685656	1
ADSS	4477	4171	0.706586	1
ADSSL1	259	183	0.25461	1
ADTRP	5	12	0.585835	1
AEBP1	25	26	1	1
AEBP2	1577	1576	1	1
AEN	16738	16819	0.979046	1
AES	12051	10876	0.574426	1
AFAP1	1689	2012	0.377705	1
AFAP1L1	32	26	0.805141	1
AFAP1L2	144	114	0.534157	1
AFF1	7258	8754	0.30859	1
AFF2	36	48	0.653915	1
AFF3	96	101	0.919793	1
AFG3L2	10967	10073	0.642175	1
AFM	4	2	0.895216	1
AFMID	1284	966	0.174521	1
AFP	9	13	0.812544	1
AFTPH	4485	5017	0.549165	1
AGA	719	763	0.79386	1
AGAP1	2083	2282	0.641531	1
AGAP10	261	322	0.453871	1
AGAP11	226	203	0.734651	1
AGAP2	1050	950	0.64013	1
AGAP3	7180	6777	0.754734	1
AGAP4	494	548	0.668747	1
AGAP5	1191	1141	0.83954	1
AGAP6	3389	3177	0.734962	1
AGAP7	221	201	0.767275	1
AGAP8	2	2	1	1
AGAP9	1739	1622	0.729098	1
AGBL1	23	14	0.618299	1
AGBL2	80	60	0.558348	1
AGBL3	91	82	0.827851	1
AGBL4	17	15	0.947275	1
AGBL5	3393	4262	0.227331	1
AGER	356	354	0.991384	1
AGFG1	5747	6729	0.394605	1
AGFG2	833	927	0.624315	1
AGGF1	3345	3718	0.577399	1
AGK	4761	4151	0.464832	1
AGL	5491	6681	0.290207	1
AGMAT	2669	1766	0.0348185	1
AGMO	6	7	1	1
AGPAT1	8883	7670	0.424633	1
AGPAT3	4467	4567	0.906744	1
AGPAT4	437	322	0.238836	1
AGPAT5	3160	2896	0.64872	1
AGPAT6	21024	20468	0.88258	1
AGPAT9	2052	2721	0.146454	1
AGPHD1	213	172	0.506926	1
AGPS	3618	5191	0.0547457	1
AGR2	6	9	0.851675	1
AGR3	3	1	0.882021	1
AGRN	25393	33194	0.138707	1
AGRP	13	13	1	1
AGT	15	12	0.885929	1
AGTR1	9	4	0.686281	1
AGTR2	8	10	0.931343	1
AGTRAP	3474	3076	0.522926	1
AGXT	13	14	1	1
AGXT2	13	9	0.812544	1
AGXT2L1	17	17	1	1
AGXT2L2	1025	1118	0.682322	1
AHCTF1	7189	8643	0.317073	1
AHCY	22489	23238	0.856536	1
AHCYL1	12011	12298	0.897307	1
AHCYL2	2597	3032	0.420215	1
AHDC1	2639	2053	0.196768	1
AHI1	1650	1845	0.575963	1
AHNAK	61756	85849	0.0677522	1
AHR	20	17	0.901815	1
AHSA1	18457	16472	0.530933	1
AHSA2	6894	6251	0.59676	1
AHSG	11	15	0.826355	1
AHSP	16	14	0.945632	1
AICDA	9	8	1	1
AIDA	6367	6352	0.990501	1
AIF1	9	6	0.851675	1
AIFM1	7181	6788	0.760842	1
AIFM2	6560	6501	0.961662	1
AIFM3	182	156	0.651936	1
AIG1	785	1130	0.0894574	1
AIM1	193	186	0.920072	1
AIM1L	32	35	0.927111	1
AIM2	2	2	1	1
AIMP1	4866	5272	0.667864	1
AIMP2	1969	1864	0.78295	1
AIP	2562	2560	0.998384	1
AIPL1	5	4	1	1
AIRE	1	1	1	1
AJAP1	2	5	0.799682	1
AJUBA	5749	7198	0.224722	1
AK2	14103	13139	0.697608	1
AK4	6881	8236	0.329447	1
AK5	18	6	0.381859	1
AK7	44	34	0.703059	1
AKAP1	6169	5775	0.722359	1
AKAP10	3726	3913	0.796076	1
AKAP11	7153	8627	0.308869	1
AKAP13	2832	3652	0.181989	1
AKAP14	9	4	0.686281	1
AKAP17A (NC_000023 1709985..1721913)	4887	4020	0.297803	1
AKAP17A (NC_000024 1659985..1671913)	5063	3993	0.205395	1
AKAP3	152	104	0.309048	1
AKAP4	8	12	0.804328	1
AKAP5	663	725	0.695573	1
AKAP6	108	115	0.888469	1
AKAP7	315	265	0.539596	1
AKAP8	3975	3944	0.967879	1
AKAP8L	5122	4057	0.213488	1
AKAP9	11160	14622	0.138721	1
AKD1	191	229	0.562657	1
AKIP1	1819	1522	0.373491	1
AKIRIN1	10846	9504	0.470636	1
AKIRIN2	1982	2457	0.271391	1
AKNAD1	16	22	0.760064	1
AKR1A1	6612	6016	0.610194	1
AKR1B1	12	25	0.44877	1
AKR1B15	87	44	0.170891	1
AKR1C1	14	23	0.618299	1
AKR1C2	14	14	1	1
AKR1C3	10	22	0.455076	1
AKR1C4	5	9	0.771412	1
AKR1D1	19	14	0.793764	1
AKR1E2	6	4	0.91251	1
AKR7A2	3241	3617	0.56351	1
AKR7A3	761	743	0.918727	1
AKT1	13745	11835	0.411974	1
AKT1S1	1839	2008	0.657299	1
AKT2	7545	6275	0.318488	1
AKT3	790	835	0.804394	1
AKTIP	1241	1508	0.340628	1
ALAS1	8792	9386	0.721793	1
ALAS2	8	4	0.756112	1
ALB	18	24	0.771388	1
ALDH16A1	2014	1514	0.152059	1
ALDH18A1	12797	13422	0.793779	1
ALDH1A2	42	37	0.866671	1
ALDH1A3	155	149	0.923168	1
ALDH1L1	92	164	0.120641	1
ALDH1L2	140	212	0.208457	1
ALDH2	8519	10366	0.28461	1
ALDH3A1	3	6	0.817618	1
ALDH3A2	3403	3446	0.94839	1
ALDH3B1	240	302	0.422505	1
ALDH3B2	17	8	0.543266	1
ALDH4A1	4643	4599	0.960297	1
ALDH5A1	3532	4227	0.341217	1
ALDH7A1	14759	14758	1	1
ALDH8A1	48	53	0.883023	1
ALDH9A1	9247	7546	0.268906	1
ALDOA	61804	60568	0.910721	1
ALDOC	2098	1805	0.446269	1
ALG1	2926	2871	0.922394	1
ALG10	905	941	0.859583	1
ALG10B	881	1029	0.469863	1
ALG11	1047	1314	0.27545	1
ALG12	1473	1367	0.715334	1
ALG13	3275	2916	0.543486	1
ALG14	261	316	0.497288	1
ALG1L	28	49	0.38799	1
ALG1L2	92	95	0.958593	1
ALG3	4849	4549	0.733325	1
ALG5	2780	2406	0.454536	1
ALG6	1380	1103	0.278986	1
ALG8	4584	3953	0.430652	1
ALG9	4028	4216	0.809108	1
ALK	26	35	0.699893	1
ALKBH1	1716	1670	0.893862	1
ALKBH2	2512	2076	0.327872	1
ALKBH3	1681	1688	0.985743	1
ALKBH4	1349	1183	0.525481	1
ALKBH5	8541	7312	0.398693	1
ALKBH6	1275	1217	0.824133	1
ALKBH7	702	621	0.593428	1
ALKBH8	1248	1533	0.313811	1
ALLC	16	43	0.184009	1
ALMS1	2081	2718	0.169146	1
ALOX12	146	238	0.126449	1
ALOX12B	517	342	0.0998991	1
ALOX15	17	17	1	1
ALOX15B	10	6	0.784137	1
ALOX5	25	31	0.80167	1
ALOX5AP	14	12	0.941856	1
ALPI	6	3	0.817618	1
ALPK2	48	61	0.67128	1
ALPK3	90	106	0.704537	1
ALPL	44	60	0.585522	1
ALPP	8	12	0.804328	1
ALPPL2	10	8	0.931343	1
ALS2	6231	7579	0.289182	1
ALS2CL	7537	7620	0.953118	1
ALS2CR11	75	74	1	1
ALS2CR12	37	44	0.803609	1
ALS2CR8	263	288	0.755668	1
ALX1	4	3	1	1
ALX3	462	437	0.828107	1
ALX4	26	30	0.880335	1
ALYREF	3720	3046	0.292882	1
AMACR	636	597	0.788479	1
AMBN	22	10	0.455076	1
AMBRA1	2824	2839	0.979403	1
AMD1	14015	17528	0.218852	1
AMDHD1	228	124	0.0651667	1
AMDHD2	2426	2265	0.72494	1
AMELX	1	1	1	1
AMFR	10321	10521	0.916798	1
AMH	66	86	0.576716	1
AMHR2	15	10	0.765186	1
AMICA1	14	9	0.756058	1
AMIGO1	1112	1410	0.250338	1
AMIGO2	15	10	0.765186	1
AMIGO3	248	200	0.481097	1
AMMECR1	1483	2097	0.0818096	1
AMMECR1L	6355	7285	0.459927	1
AMN	21	54	0.15005	1
AMN1	557	449	0.373628	1
AMOT	522	462	0.618349	1
AMOTL1	4193	5945	0.061722	1
AMOTL2	12104	14513	0.319352	1
AMPD1	17	23	0.76592	1
AMPD2	5665	5947	0.794053	1
AMPD3	437	684	0.0580529	1
AMPH	62	85	0.509397	1
AMT	664	562	0.473168	1
AMTN	3	2	1	1
AMY1A	6	3	0.817618	1
AMY1B	3	10	0.532796	1
AMY1C	3	4	1	1
AMY2A	4	8	0.756112	1
AMZ1	14	29	0.411617	1
AMZ2	8637	9508	0.600642	1
ANAPC1	6746	7337	0.649387	1
ANAPC10	797	901	0.576044	1
ANAPC11	2779	2253	0.278279	1
ANAPC13	5394	6548	0.296149	1
ANAPC15	503	498	0.973435	1
ANAPC16	3027	2855	0.760858	1
ANAPC4	2605	2582	0.964867	1
ANAPC5	11613	10417	0.552172	1
ANAPC7	5021	4801	0.810994	1
ANG	251	242	0.910789	1
ANGEL1	3599	3540	0.931516	1
ANGEL2	4042	5065	0.228689	1
ANGPT1	36	47	0.681849	1
ANGPT2	10	8	0.931343	1
ANGPT4	7	8	1	1
ANGPTL1	1	10	0.328009	1
ANGPTL3	9	14	0.756058	1
ANGPTL4	354	321	0.719764	1
ANGPTL5	12	9	0.872001	1
ANGPTL6	73	66	0.853302	1
ANGPTL7	6	10	0.784137	1
ANHX	8	6	0.923546	1
ANK1	203	168	0.56346	1
ANK2	271	288	0.837336	1
ANK3	112	127	0.753579	1
ANKAR	105	149	0.350256	1
ANKDD1A	760	794	0.847127	1
ANKDD1B	22	23	1	1
ANKFN1	14	27	0.473315	1
ANKFY1	7946	8109	0.912562	1
ANKH	2682	3303	0.276475	1
ANKHD1	7369	8467	0.450555	1
ANKHD1-EIF4EBP3	4694	5431	0.434542	1
ANKIB1	6462	7680	0.349662	1
ANKK1	15	26	0.5525	1
ANKLE1	208	161	0.432069	1
ANKLE2	8455	8400	0.972157	1
ANKMY1	461	522	0.612119	1
ANKMY2	2803	3190	0.499304	1
ANKRA2	4764	4545	0.802076	1
ANKRD10	2209	2212	0.996294	1
ANKRD11	8773	11907	0.0955332	1
ANKRD12	4400	5973	0.101464	1
ANKRD13B	3165	2438	0.174502	1
ANKRD13C	2030	2468	0.316722	1
ANKRD13D	2716	2337	0.437406	1
ANKRD16	615	672	0.702453	1
ANKRD17	10662	12929	0.291152	1
ANKRD2	7	5	0.91856	1
ANKRD20A19P	11	20	0.585764	1
ANKRD22	45	18	0.201661	1
ANKRD23	1029	937	0.662785	1
ANKRD24	271	149	0.0540161	1
ANKRD26	1293	1614	0.27508	1
ANKRD27	3263	3776	0.441392	1
ANKRD28	3328	3611	0.667611	1
ANKRD29	19	6	0.346647	1
ANKRD30A	16	28	0.527752	1
ANKRD30B	20	27	0.741489	1
ANKRD31	205	201	0.961771	1
ANKRD32	1369	1109	0.308979	1
ANKRD33	5	4	1	1
ANKRD34A	626	542	0.540162	1
ANKRD34B	12	13	1	1
ANKRD34C	36	30	0.81752	1
ANKRD35	11	11	1	1
ANKRD39	1146	1197	0.836973	1
ANKRD40	6955	7341	0.770076	1
ANKRD42	709	714	0.979952	1
ANKRD44	569	549	0.884688	1
ANKRD45	84	125	0.327097	1
ANKRD46	2163	2012	0.71332	1
ANKRD49	897	977	0.693321	1
ANKRD5	56	23	0.163244	1
ANKRD50	3939	5512	0.0728882	1
ANKRD52	17252	18731	0.650493	1
ANKRD53	48	66	0.556613	1
ANKRD54	2538	2028	0.249758	1
ANKRD55	12	12	1	1
ANKRD6	102	75	0.483686	1
ANKRD60	1	1	1	1
ANKRD62	4	13	0.456725	1
ANKRD63	24	22	0.955834	1
ANKRD65	2	22	0.0841632	1
ANKRD7	4	3	1	1
ANKRD9	458	462	0.978731	1
ANKS1A	3720	3492	0.738999	1
ANKS1B	82	73	0.816735	1
ANKS3	1090	878	0.311297	1
ANKS4B	18	15	0.89625	1
ANKUB1	17	37	0.318144	1
ANKZF1	3773	3335	0.515194	1
ANLN	10488	11737	0.538189	1
ANO1	35	38	0.930294	1
ANO10	845	1111	0.200395	1
ANO2	281	472	0.0461253	1
ANO3	48	37	0.685685	1
ANO4	45	53	0.793366	1
ANO5	24	30	0.798023	1
ANO6	5244	7343	0.0695459	1
ANO7	498	432	0.566298	1
ANO8	2003	1869	0.727028	1
ANO9	734	858	0.4807	1
ANP32A	9681	8878	0.636951	1
ANP32E	10344	9853	0.790758	1
ANPEP	26	26	1	1
ANTXR1	36	56	0.458217	1
ANTXR2	1934	1834	0.789961	1
ANXA10	11	20	0.585764	1
ANXA11	5587	4934	0.504856	1
ANXA13	17	15	0.947275	1
ANXA2	40873	48124	0.365203	1
ANXA2R	102	109	0.884716	1
ANXA3	13	20	0.693781	1
ANXA4	5257	4475	0.388853	1
ANXA5	35233	41300	0.378699	1
ANXA6	8075	10012	0.241509	1
ANXA7	8450	9436	0.547717	1
ANXA8	3	2	1	1
ANXA8L1	29	24	0.836365	1
ANXA8L2	23	17	0.76592	1
ANXA9	656	591	0.654198	1
AOAH	8	9	1	1
AOC2	1141	1236	0.702388	1
AOC3	585	741	0.300699	1
AOX1	57	93	0.295961	1
AP1AR	2734	3136	0.474137	1
AP1B1	10477	10447	0.9879	1
AP1G1	12509	15554	0.231737	1
AP1G2	4736	4301	0.607487	1
AP1M1	2774	2947	0.753345	1
AP1M2	1849	2028	0.640682	1
AP1S1	15655	14468	0.664742	1
AP1S2	5020	5974	0.349762	1
AP1S3	25	40	0.511142	1
AP2A1	5172	5244	0.941602	1
AP2A2	5444	4445	0.277791	1
AP2B1	22549	26899	0.329827	1
AP2M1	33595	35512	0.758589	1
AP2S1	4148	3570	0.426706	1
AP3B1	2158	2389	0.602494	1
AP3B2	24	21	0.910807	1
AP3D1	9048	8981	0.968141	1
AP3M1	7594	7479	0.934504	1
AP3M2	2807	2590	0.676777	1
AP3S1	3950	4071	0.873568	1
AP3S2	947	1067	0.576333	1
AP4B1	3115	3550	0.492043	1
AP4E1	5257	6974	0.127712	1
AP4M1	2260	1756	0.200086	1
AP4S1	437	447	0.934276	1
AP5B1	4118	3773	0.642982	1
AP5M1	3843	4268	0.577776	1
AP5S1	761	843	0.644721	1
AP5Z1	3597	3402	0.769557	1
APAF1	9393	9456	0.971347	1
APBA2	30	44	0.569845	1
APBA3	1454	1547	0.761011	1
APBB1	2174	2085	0.832436	1
APBB1IP	29	27	0.96	1
APBB3	2195	1917	0.491093	1
APC	6892	8371	0.291442	1
APC2	1103	1138	0.884356	1
APCDD1	3	2	1	1
APCDD1L	8	9	1	1
APEH	16588	15883	0.811259	1
APEX1	11313	11921	0.774551	1
APEX2	3751	3491	0.704928	1
APH1A	11046	10192	0.66011	1
APH1B	2408	2526	0.806097	1
API5	18042	19325	0.705029	1
APIP	1459	1524	0.831558	1
APITD1	248	172	0.238024	1
APITD1-CORT	624	551	0.597017	1
APLF	451	508	0.629545	1
APLN	1153	1033	0.6027	1
APLNR	11	8	0.866149	1
APLP1	16681	14964	0.550202	1
APLP2	25411	30544	0.309018	1
APMAP	10827	9217	0.379373	1
APOA1	5	3	0.904965	1
APOA1BP	6359	5636	0.515385	1
APOA2	22	9	0.404486	1
APOA4	25	13	0.495249	1
APOA5	6	7	1	1
APOB	58	84	0.443613	1
APOBEC1	6	4	0.91251	1
APOBEC2	12	20	0.639992	1
APOBEC3A	9	5	0.771412	1
APOBEC3B	7461	6142	0.292609	1
APOBEC3C	12746	10901	0.391812	1
APOBEC3G	6	8	0.923546	1
APOBEC3H	534	503	0.808002	1
APOBEC4	14	12	0.941856	1
APOBR	40	32	0.757348	1
APOC1	924	676	0.156704	1
APOC2	2	4	0.895216	1
APOC3	7	5	0.91856	1
APOC4	4	4	1	1
APOD	20	14	0.746984	1
APOE	25	35	0.661491	1
APOF	8	7	1	1
APOH	9	9	1	1
APOL2	11371	9735	0.395867	1
APOL3	22	17	0.80965	1
APOL4	19	16	0.899141	1
APOL5	4	2	0.895216	1
APOLD1	130	152	0.670663	1
APOM	84	90	0.892282	1
APOO	975	891	0.677519	1
APOOL	3668	4195	0.47669	1
APOPT1	803	729	0.665937	1
APP	13365	19382	0.0412729	1
APPBP2	3933	4036	0.891742	1
APPL1	4112	4962	0.316098	1
APPL2	2455	2451	0.994952	1
APRT	3705	3447	0.703761	1
AQP1	39	45	0.838993	1
AQP10	6	0	0.421352	1
AQP11	161	205	0.460473	1
AQP12A	1	5	0.676683	1
AQP12B	2	0	0.863177	1
AQP2	7	4	0.831406	1
AQP4	7	12	0.734159	1
AQP5	4	4	1	1
AQP6	23	10	0.420438	1
AQP8	19	19	1	1
AQP9	17	18	1	1
AQPEP	24	41	0.451249	1
AQR	3950	4430	0.542125	1
AR	22	67	0.0662534	1
ARAF	3262	3007	0.670244	1
ARAP1	5440	5279	0.87242	1
ARAP3	5811	4974	0.403551	1
ARCN1	24699	25355	0.884927	1
ARF1	27650	28737	0.831168	1
ARF3	18768	18887	0.972424	1
ARF4	20442	20519	0.983657	1
ARF5	8773	8034	0.632246	1
ARF6	6308	6460	0.898202	1
ARFGAP1	16254	13936	0.397712	1
ARFGAP2	6336	5687	0.560308	1
ARFGAP3	3953	3741	0.770916	1
ARFGEF1	9281	10967	0.361989	1
ARFGEF2	8498	10658	0.216805	1
ARFIP1	3091	3200	0.856841	1
ARFIP2	5980	4981	0.32598	1
ARFRP1	1487	1368	0.683296	1
ARG1	16	12	0.832242	1
ARG2	5209	4246	0.274674	1
ARGFX	7	11	0.794961	1
ARGLU1	6051	5674	0.72928	1
ARHGAP1	8207	7203	0.47873	1
ARHGAP10	1040	1151	0.63112	1
ARHGAP11A	8704	7785	0.544058	1
ARHGAP11B	422	418	0.977203	1
ARHGAP12	4713	6017	0.189789	1
ARHGAP15	25	22	0.912715	1
ARHGAP17	3241	3261	0.975461	1
ARHGAP18	947	796	0.425283	1
ARHGAP19	3136	2526	0.259978	1
ARHGAP20	28	55	0.277383	1
ARHGAP21	9756	12504	0.174807	1
ARHGAP22	938	1104	0.443586	1
ARHGAP23	1461	1758	0.357316	1
ARHGAP24	43	28	0.530974	1
ARHGAP25	16	25	0.636258	1
ARHGAP26	1078	1352	0.275101	1
ARHGAP27	2952	2784	0.760867	1
ARHGAP28	22	35	0.547013	1
ARHGAP30	117	124	0.893583	1
ARHGAP31	1556	2377	0.0320311	1
ARHGAP32	1826	2509	0.10461	1
ARHGAP33	482	390	0.398291	1
ARHGAP35	6008	6344	0.769414	1
ARHGAP36	33	31	0.962647	1
ARHGAP39	1804	1506	0.367821	1
ARHGAP4	66	60	0.870659	1
ARHGAP40	337	334	0.982042	1
ARHGAP42	779	1135	0.079384	1
ARHGAP44	1994	1765	0.538404	1
ARHGAP5	6459	7967	0.255583	1
ARHGAP6	24	19	0.818493	1
ARHGAP9	67	51	0.611285	1
ARHGDIA	9878	13661	0.0762197	1
ARHGDIB	9	7	0.927745	1
ARHGDIG	65	19	0.0500274	1
ARHGEF1	4736	5272	0.565911	1
ARHGEF10	2053	2649	0.190047	1
ARHGEF10L	1320	1219	0.701264	1
ARHGEF11	5238	4844	0.675517	1
ARHGEF12	10345	15230	0.0343543	1
ARHGEF15	6	8	0.923546	1
ARHGEF16	3127	2440	0.196936	1
ARHGEF17	4803	6042	0.217761	1
ARHGEF18	4245	4623	0.649612	1
ARHGEF19	1720	1376	0.268837	1
ARHGEF2	4279	4346	0.934929	1
ARHGEF25	3	0	0.729462	1
ARHGEF26	272	474	0.0332551	1
ARHGEF3	1694	1763	0.843151	1
ARHGEF33	48	36	0.653915	1
ARHGEF35	630	622	0.961074	1
ARHGEF37	995	629	0.0374791	1
ARHGEF38	24	25	1	1
ARHGEF4	48	62	0.647208	1
ARHGEF40	2205	1968	0.56288	1
ARHGEF5	11717	11904	0.931196	1
ARHGEF6	379	241	0.0986736	1
ARHGEF7	6050	5805	0.824184	1
ARHGEF9	1076	1158	0.72818	1
ARID1A	6651	7092	0.728493	1
ARID1B	1894	2032	0.722551	1
ARID2	3996	4969	0.245232	1
ARID3A	2160	2248	0.839418	1
ARID3B	2022	1575	0.208977	1
ARID4A	2714	2824	0.837354	1
ARID4B	3169	3805	0.335071	1
ARID5A	1102	889	0.313848	1
ARID5B	1754	1822	0.850053	1
ARIH1	8578	9115	0.741052	1
ARIH2	11506	12089	0.786782	1
ARL1	7189	9692	0.10445	1
ARL10	12	14	0.941856	1
ARL11	3	2	1	1
ARL13A	25	34	0.694897	1
ARL13B	726	717	0.960373	1
ARL14	7	13	0.676944	1
ARL14EP	2636	2741	0.840424	1
ARL14EPL	3	3	1	1
ARL15	553	711	0.275619	1
ARL16	1451	1214	0.384996	1
ARL17A	970	1089	0.586721	1
ARL17B	227	210	0.807711	1
ARL2	1748	1666	0.811577	1
ARL2BP	9280	9459	0.917393	1
ARL3	991	759	0.219962	1
ARL4A	718	899	0.307636	1
ARL4C	410	451	0.708309	1
ARL4D	4	5	1	1
ARL5A	4497	5647	0.222453	1
ARL5B	5507	7236	0.14061	1
ARL5C	2	2	1	1
ARL6	382	486	0.336989	1
ARL6IP1	33017	30939	0.718956	1
ARL6IP4	4128	3694	0.55617	1
ARL6IP5	6225	5716	0.645894	1
ARL6IP6	805	775	0.8673	1
ARL8A	5514	4963	0.572298	1
ARL8B	9306	10471	0.519656	1
ARL9	25	23	0.956763	1
ARMC1	6651	7297	0.615862	1
ARMC10	5169	5064	0.913078	1
ARMC12	70	33	0.178072	1
ARMC2	55	43	0.68012	1
ARMC3	10	14	0.819831	1
ARMC4	41	34	0.795601	1
ARMC5	1922	1803	0.748324	1
ARMC6	3362	2942	0.484416	1
ARMC7	1181	1150	0.90131	1
ARMC8	3016	3051	0.95314	1
ARMC9	972	861	0.575636	1
ARMCX1	48	39	0.749421	1
ARMCX3	7594	9118	0.319891	1
ARMCX4	865	682	0.284327	1
ARMCX5	944	978	0.87197	1
ARMCX5-GPRASP2	260	295	0.660824	1
ARMCX6	2353	2456	0.826526	1
ARNT	4001	4327	0.67748	1
ARNT2	1703	2096	0.294008	1
ARNTL	1491	1567	0.807399	1
ARNTL2	3434	3506	0.913946	1
ARPC1A	12106	11512	0.783054	1
ARPC1B	5729	5222	0.618704	1
ARPC2	22106	20242	0.626914	1
ARPC3	11631	12298	0.760144	1
ARPC4	7576	6813	0.565201	1
ARPC5	8914	9069	0.925564	1
ARPP19	21624	25075	0.413536	1
ARPP21	12	7	0.734159	1
ARR3	70	67	0.950467	1
ARRB1	4131	5132	0.24666	1
ARRB2	7248	6316	0.456509	1
ARRDC2	2380	2279	0.824876	1
ARRDC3	4255	4699	0.596807	1
ARRDC4	5721	5700	0.984938	1
ARRDC5	5	6	1	1
ARSB	834	1031	0.324822	1
ARSD	2608	1967	0.147877	1
ARSE	20	16	0.851116	1
ARSF	35	12	0.204371	1
ARSH	19	13	0.739631	1
ARSI	8	17	0.543266	1
ARSJ	1688	1626	0.853688	1
ARSK	486	493	0.959467	1
ART1	1	3	0.882021	1
ART3	17	16	1	1
ART4	1	0	1	1
ART5	40	29	0.650952	1
ARTN	12	12	1	1
ARVCF	5769	5370	0.700243	1
ARX	10	8	0.931343	1
AS3MT	109	85	0.557839	1
ASAH1	2818	4154	0.0411909	1
ASAH2	79	123	0.281371	1
ASAH2B	419	485	0.557758	1
ASAP3	3318	2498	0.138822	1
ASB10	4	2	0.895216	1
ASB11	16	11	0.773386	1
ASB12	4	4	1	1
ASB14	179	270	0.175048	1
ASB15	37	44	0.803609	1
ASB16	938	835	0.59343	1
ASB17	11	10	1	1
ASB18	1	5	0.676683	1
ASB2	8	11	0.866149	1
ASB3	72	134	0.127175	1
ASB4	25	23	0.956763	1
ASB5	12	17	0.780807	1
ASB7	1926	2258	0.417876	1
ASB8	1662	1790	0.711297	1
ASB9	14	10	0.819831	1
ASCC1	2611	2638	0.958943	1
ASCC2	4897	4781	0.898652	1
ASCC3	10832	14463	0.113344	1
ASCL1	7	6	1	1
ASCL2	6	5	1	1
ASCL3	12	26	0.416642	1
ASCL4	2	4	0.895216	1
ASF1A	2740	2977	0.666088	1
ASGR1	532	596	0.63278	1
ASGR2	11	9	0.93447	1
ASH1L	5219	6823	0.148791	1
ASH2L	5612	5313	0.769004	1
ASIC1	2596	2292	0.521021	1
ASIC2	5	6	1	1
ASIC3	670	419	0.0485054	1
ASIC4	2	8	0.560401	1
ASIC5	3	5	0.904965	1
ASIP	33	38	0.859034	1
ASL	2592	2239	0.450844	1
ASMT (NC_000023 1713847..1762474)	16	14	0.945632	1
ASMT (NC_000024 1663847..1712474)	18	8	0.500117	1
ASMTL (NC_000023 1521531..1573155)	1141	1078	0.789044	1
ASMTL (NC_000024 1471531..1523155)	1179	1028	0.515073	1
ASNA1	5499	5753	0.808542	1
ASNS	7158	7558	0.768392	1
ASNSD1	6487	6043	0.702201	1
ASPDH	53	38	0.584048	1
ASPG	8	10	0.931343	1
ASPH	12310	15206	0.246272	1
ASPHD1	2068	1567	0.162621	1
ASPHD2	1118	1137	0.938955	1
ASPM	8341	9087	0.641034	1
ASPRV1	48	33	0.559644	1
ASPSCR1	1422	1054	0.148033	1
ASRGL1	15	17	0.947275	1
ASTE1	516	544	0.829797	1
ASTL	9	15	0.7025	1
ASTN1	41	56	0.597067	1
ASUN	2936	2917	0.974329	1
ASXL1	8146	8355	0.890821	1
ASXL2	3174	4413	0.0814057	1
ASXL3	29	19	0.622947	1
ASZ1	11	13	0.939665	1
ATAD1	6596	6434	0.893607	1
ATAD2	13112	12300	0.72603	1
ATAD2B	955	1261	0.185659	1
ATAD3A	4262	3574	0.350688	1
ATAD3B	3886	3024	0.18654	1
ATAD3C	37	20	0.41835	1
ATAD5	2384	2802	0.402952	1
ATCAY	49	39	0.720871	1
ATE1	1081	1348	0.287498	1
ATF1	2145	2276	0.762649	1
ATF2	3616	3913	0.676616	1
ATF3	5764	4859	0.359238	1
ATF4	17851	20493	0.446761	1
ATF5	3642	3313	0.618162	1
ATF6	4158	4725	0.495663	1
ATF6B	6130	5927	0.856421	1
ATF7	2737	3210	0.405092	1
ATF7IP	3689	4513	0.284198	1
ATF7IP2	1349	1043	0.215948	1
ATG10	206	217	0.876459	1
ATG12	4052	4356	0.700831	1
ATG13	9916	9387	0.765019	1
ATG14	2974	3223	0.674261	1
ATG16L1	3713	3444	0.691905	1
ATG16L2	1381	1300	0.769955	1
ATG2A	17992	17209	0.806522	1
ATG2B	9371	10776	0.445521	1
ATG3	3074	3272	0.74411	1
ATG4A	2355	2401	0.922186	1
ATG4B	6411	5373	0.341376	1
ATG4C	948	785	0.386743	1
ATG4D	3075	2620	0.404225	1
ATG5	2641	2546	0.850709	1
ATG7	2419	2293	0.784295	1
ATG9A	10348	11080	0.708746	1
ATG9B	123	131	0.879886	1
ATHL1	7936	6937	0.465591	1
ATIC	9627	9266	0.835146	1
ATL1	235	234	1	1
ATL2	6482	6423	0.961213	1
ATL3	3637	4375	0.326909	1
ATM	6565	8894	0.0996363	1
ATMIN	4775	4890	0.899399	1
ATN1	16134	14290	0.504629	1
ATOH7	14	15	1	1
ATOH8	230	109	0.0262242	1
ATOX1	2024	2023	1	1
ATP10A	14	15	1	1
ATP10B	42	55	0.65087	1
ATP10D	2280	2881	0.225916	1
ATP11A	5956	7095	0.344351	1
ATP11B	6563	8515	0.157994	1
ATP11C	2135	2524	0.38983	1
ATP12A	15	17	0.947275	1
ATP13A1	9522	8816	0.674676	1
ATP13A2	11163	9651	0.426441	1
ATP13A4	22	30	0.714407	1
ATP13A5	9	9	1	1
ATP1A1	58021	54294	0.712447	1
ATP1A2	14	15	1	1
ATP1A3	2875	2362	0.308521	1
ATP1A4	22	18	0.858534	1
ATP1B1	4427	6516	0.0381771	1
ATP1B2	14	5	0.483363	1
ATP1B3	16528	14432	0.455874	1
ATP1B4	9	4	0.686281	1
ATP2A1	692	605	0.559666	1
ATP2A2	27836	33465	0.308234	1
ATP2A3	38	15	0.237712	1
ATP2B1	3630	5239	0.0508625	1
ATP2B2	51	40	0.696491	1
ATP2B3	16	8	0.589321	1
ATP2C1	8905	10837	0.283883	1
ATP2C2	159	243	0.177678	1
ATP4A	15	16	1	1
ATP4B	12	9	0.872001	1
ATP5A1	47008	45947	0.899281	1
ATP5B	71255	70069	0.925744	1
ATP5C1	16412	17386	0.751041	1
ATP5D	3261	3102	0.794006	1
ATP5E	9416	8811	0.717564	1
ATP5F1	14800	14994	0.943186	1
ATP5G1	2491	2108	0.391525	1
ATP5G2	6578	5828	0.513682	1
ATP5G3	12882	12631	0.914335	1
ATP5H	7735	7581	0.913529	1
ATP5I	4340	3782	0.464993	1
ATP5J	4672	4584	0.919889	1
ATP5J2	8496	8182	0.838022	1
ATP5J2-PTCD1	2486	2249	0.606771	1
ATP5L	10678	11183	0.800661	1
ATP5O	6944	6998	0.967119	1
ATP5S	431	537	0.36829	1
ATP5SL	2717	2662	0.916769	1
ATP6AP1	13276	12655	0.792879	1
ATP6AP1L	100	37	0.0432387	1
ATP6AP2	12101	13748	0.484003	1
ATP6V0A1	8283	11101	0.110426	1
ATP6V0A2	1210	1230	0.939853	1
ATP6V0B	9191	10517	0.461947	1
ATP6V0C	13882	13316	0.819426	1
ATP6V0D1	7599	8123	0.717412	1
ATP6V0D2	43	41	0.96761	1
ATP6V0E1	11062	12863	0.408658	1
ATP6V0E2	14	18	0.842479	1
ATP6V1A	14521	16325	0.519651	1
ATP6V1B1	51	29	0.374215	1
ATP6V1B2	9868	10324	0.80535	1
ATP6V1C1	16565	20659	0.223804	1
ATP6V1C2	85	156	0.111645	1
ATP6V1D	8809	9392	0.727072	1
ATP6V1E1	11438	11291	0.943885	1
ATP6V1E2	467	288	0.0627475	1
ATP6V1F	17965	17627	0.916862	1
ATP6V1G2	21	14	0.702149	1
ATP6V1G3	0	1	1	1
ATP6V1H	8284	8617	0.830517	1
ATP7A	1566	2217	0.0792717	1
ATP7B	1785	2042	0.496702	1
ATP8A1	437	678	0.0634359	1
ATP8A2	31	80	0.0798884	1
ATP8B1	65	115	0.185908	1
ATP8B2	1182	1568	0.166898	1
ATP8B3	871	655	0.200174	1
ATP8B4	95	100	0.919307	1
ATP9A	4377	4624	0.770164	1
ATP9B	817	807	0.959584	1
ATPAF1	3898	3568	0.640246	1
ATPAF1-AS1	4	8	0.756112	1
ATPAF2	1396	1216	0.502722	1
ATPBD4	291	272	0.818235	1
ATPIF1	5614	4826	0.417168	1
ATR	3468	4233	0.291073	1
ATRIP	2815	2171	0.179856	1
ATRN	4567	5949	0.156227	1
ATRNL1	18	27	0.65199	1
ATRX	4512	6767	0.0296127	1
ATXN1	472	691	0.10394	1
ATXN10	4948	5419	0.625981	1
ATXN1L	6040	7550	0.227456	1
ATXN2	3162	3541	0.551816	1
ATXN2L	15580	12338	0.200416	1
ATXN3	1758	2074	0.403265	1
ATXN3L	3	3	1	1
ATXN7	2821	3461	0.283969	1
ATXN7L1	863	1066	0.324165	1
ATXN7L2	915	811	0.581285	1
ATXN7L3	7437	6500	0.465958	1
ATXN7L3B	13281	12285	0.669077	1
AUP1	12597	10670	0.363372	1
AURKA	7283	5577	0.149649	1
AURKAIP1	4453	3869	0.454937	1
AURKC	75	65	0.782261	1
AUTS2	41	43	0.96761	1
AVEN	404	378	0.801536	1
AVIL	248	338	0.266941	1
AVL9	1864	2707	0.0558512	1
AVP	2	2	1	1
AVPI1	1790	2509	0.0848673	1
AVPR1A	33	35	0.963802	1
AVPR1B	1	5	0.676683	1
AVPR2	2	1	1	1
AWAT1	2	3	1	1
AWAT2	5	7	0.91856	1
AXDND1	387	564	0.12429	1
AXIN1	3649	3168	0.456905	1
AXIN2	880	868	0.95357	1
AXL	14703	18179	0.243085	1
AZGP1	14	19	0.793764	1
AZI1	2725	2046	0.140291	1
AZI2	4636	4698	0.944234	1
AZIN1	15774	20238	0.170146	1
AZU1	10	6	0.784137	1
B2M	73406	61961	0.346584	1
B3GALNT1	3630	3561	0.920295	1
B3GALNT2	4997	5918	0.363406	1
B3GALT1	13	5	0.532593	1
B3GALT2	0	1	1	1
B3GALT4	42	29	0.592105	1
B3GALT5	3	7	0.737119	1
B3GALT6	2459	2142	0.478854	1
B3GALTL	1123	1144	0.932499	1
B3GAT1	984	1323	0.156449	1
B3GAT2	5	5	1	1
B3GAT3	3245	2278	0.0661168	1
B3GNT1	1650	1518	0.679896	1
B3GNT2	2531	2493	0.939165	1
B3GNT3	4	2	0.895216	1
B3GNT4	59	62	0.946904	1
B3GNT5	1248	1251	0.993795	1
B3GNT6	5	4	1	1
B3GNT7	9	22	0.404486	1
B3GNT8	12	16	0.832242	1
B3GNT9	944	942	0.99604	1
B3GNTL1	567	496	0.577833	1
B4GALNT1	11	8	0.866149	1
B4GALNT2	6	11	0.720758	1
B4GALNT3	2666	2603	0.902638	1
B4GALNT4	2280	1748	0.177178	1
B4GALT2	3056	3122	0.91206	1
B4GALT3	4776	4798	0.981251	1
B4GALT4	1548	1614	0.837562	1
B4GALT5	7993	9764	0.275775	1
B4GALT7	1456	1470	0.964942	1
B9D1	717	472	0.0732681	1
B9D2	118	114	0.945427	1
BAALC	40	31	0.72188	1
BABAM1	4595	3873	0.363164	1
BACE1	2193	2291	0.82401	1
BACE2	2602	2490	0.821101	1
BACH1	3970	5444	0.0918782	1
BACH2	57	54	0.944314	1
BAD	1988	1781	0.579289	1
BAG2	6123	6447	0.781106	1
BAG3	7895	6727	0.385445	1
BAG4	3217	3358	0.822527	1
BAG5	4407	5077	0.449403	1
BAG6	21323	21343	0.996076	1
BAGE2	16	23	0.717084	1
BAHCC1	1695	1297	0.186374	1
BAHD1	5013	5158	0.879161	1
BAI1	392	226	0.045049	1
BAI2	2786	2134	0.169088	1
BAI3	26	21	0.826271	1
BAIAP2	3125	3189	0.916484	1
BAIAP2L1	8181	6966	0.383015	1
BAIAP2L2	176	104	0.14329	1
BAK1	9470	8840	0.707643	1
BAMBI	1141	1192	0.836371	1
BANF1	6361	5645	0.519845	1
BANF2	6	0	0.421352	1
BANK1	50	58	0.803837	1
BANP	809	664	0.37816	1
BAP1	8743	8001	0.629604	1
BARD1	797	812	0.936679	1
BARHL2	3	2	1	1
BARX2	11	11	1	1
BASP1	15	13	0.943834	1
BATF	1	5	0.676683	1
BATF2	10	29	0.255522	1
BATF3	353	286	0.440415	1
BAX	14032	11577	0.291688	1
BAZ1A	8860	9504	0.70226	1
BAZ1B	12935	13805	0.721021	1
BAZ2A	22199	24523	0.58239	1
BAZ2B	2065	1870	0.61576	1
BBC3	2622	1951	0.129461	1
BBIP1	461	675	0.105505	1
BBOX1	9	13	0.812544	1
BBS1	3793	3392	0.555523	1
BBS10	1914	2026	0.77434	1
BBS12	547	505	0.74258	1
BBS2	3804	3531	0.694396	1
BBS4	4154	3785	0.621984	1
BBS5	22	14	0.659258	1
BBS7	4056	3812	0.742704	1
BBS9	430	537	0.363334	1
BBX	3871	5236	0.107283	1
BCAM	11486	10508	0.626458	1
BCAN	1161	1488	0.226822	1
BCAP29	6924	6512	0.740306	1
BCAP31	21900	20212	0.658082	1
BCAR1	5704	5636	0.949226	1
BCAR3	1139	1440	0.254958	1
BCAS1	28	16	0.527752	1
BCAS2	6040	5573	0.665022	1
BCAS3	505	728	0.114302	1
BCAS4	914	871	0.82709	1
BCAT1	37	64	0.331897	1
BCAT2	3224	2748	0.403968	1
BCCIP	5406	5458	0.959705	1
BCDIN3D	874	624	0.131197	1
BCHE	17	10	0.663876	1
BCKDHA	2827	2407	0.404755	1
BCKDHB	738	706	0.847397	1
BCKDK	6184	5428	0.482658	1
BCL10	6136	5755	0.730069	1
BCL11A	238	205	0.629298	1
BCL11B	167	121	0.366486	1
BCL2	526	852	0.0336227	1
BCL2A1	8	11	0.866149	1
BCL2L1	12516	11957	0.802454	1
BCL2L10	8	8	1	1
BCL2L11	4227	3574	0.373817	1
BCL2L13	2963	2633	0.539188	1
BCL2L14	21	18	0.904299	1
BCL2L15	51	51	1	1
BCL2L2	1330	1088	0.333533	1
BCL2L2-PABPN1	4001	3978	0.97661	1
BCL3	582	515	0.60879	1
BCL6	2312	2066	0.565533	1
BCL6B	7	7	1	1
BCL7A	2242	2447	0.653514	1
BCL7B	3073	2752	0.565224	1
BCL7C	1595	1423	0.573582	1
BCL9	1559	1622	0.845787	1
BCL9L	13490	13859	0.882447	1
BCLAF1	19895	22527	0.492969	1
BCMO1	12	9	0.872001	1
BCO2	88	166	0.0896167	1
BCOR	1098	1721	0.0277863	1
BCORL1	6822	6109	0.550989	1
BCR	6151	6216	0.9554	1
BCS1L	3081	2698	0.489005	1
BDH1	2814	2370	0.373997	1
BDH2	2088	2040	0.907421	1
BDKRB1	5	8	0.842492	1
BDKRB2	10	13	0.87717	1
BDP1	7239	9689	0.113074	1
BEAN1	26	44	0.44136	1
BECN1	7125	7489	0.787373	1
BEGAIN	229	224	0.952663	1
BEND2	30	39	0.717836	1
BEND3	915	895	0.922212	1
BEND4	24	33	0.689665	1
BEND5	1	4	0.774372	1
BEND6	6	13	0.605915	1
BEND7	1849	1811	0.918589	1
BEST1	41	36	0.864867	1
BEST2	14	15	1	1
BEST3	143	157	0.800297	1
BEST4	109	81	0.485517	1
BET1	3523	3550	0.968998	1
BET1L	6782	6337	0.714002	1
BET3L	5	3	0.904965	1
BEX1	0	1	1	1
BEX2	1	0	1	1
BEX4	6	9	0.851675	1
BEX5	807	827	0.915235	1
BFAR	5069	5926	0.401188	1
BFSP1	115	66	0.196893	1
BFSP2	31	32	1	1
BGLAP	1	0	1	1
BGN	1	10	0.328009	1
BHLHA15	269	276	0.937539	1
BHLHA9	1	0	1	1
BHLHB9	145	173	0.61226	1
BHLHE22	1	1	1	1
BHLHE41	1116	963	0.487207	1
BHMT	21	15	0.753772	1
BHMT2	13	3	0.377845	1
BICC1	18	29	0.580031	1
BICD1	555	556	1	1
BID	3579	3611	0.963612	1
BIK	347	230	0.141871	1
BIN1	3935	3360	0.404032	1
BIN2	22	15	0.709891	1
BIN3	454	407	0.666966	1
BIRC2	5937	7918	0.119388	1
BIRC5	6796	4967	0.0915983	1
BIRC7	2	0	0.863177	1
BIRC8	4	5	1	1
BIVM	4008	3819	0.798553	1
BIVM-ERCC5	2316	1868	0.27334	1
BLCAP	12661	10838	0.394577	1
BLID	2	2	1	1
BLK	3	12	0.424529	1
BLM	2763	2088	0.148964	1
BLMH	3898	4488	0.453622	1
BLOC1S1	1326	1172	0.55136	1
BLOC1S2	11142	9892	0.515459	1
BLOC1S3	1842	1796	0.900526	1
BLVRA	2596	2641	0.930426	1
BLVRB	6698	5309	0.210451	1
BLZF1	2269	2732	0.337536	1
BMF	1052	882	0.410859	1
BMI1	5919	8527	0.0482835	1
BMP1	3042	2145	0.0707272	1
BMP10	11	12	1	1
BMP15	6	5	1	1
BMP2	31	28	0.922181	1
BMP2K	2280	2900	0.21304	1
BMP3	13	17	0.837591	1
BMP4	6	7	1	1
BMP5	6	3	0.817618	1
BMP6	19	23	0.861872	1
BMP7	18	11	0.674773	1
BMP8A	881	865	0.936656	1
BMP8B	251	258	0.934493	1
BMPER	20	24	0.864998	1
BMPR1A	1783	2363	0.151656	1
BMPR1B	22	25	0.912715	1
BMPR2	2477	3593	0.052082	1
BMS1	18401	19182	0.818899	1
BMX	41	39	0.96676	1
BNC1	18	11	0.674773	1
BNIP1	600	667	0.648351	1
BNIP2	5420	6517	0.320582	1
BNIP3	94	103	0.840351	1
BNIP3L	6353	7091	0.552304	1
BNIPL	150	156	0.923486	1
BOC	11	17	0.722864	1
BOD1	2780	2939	0.772781	1
BOD1L2	0	2	0.863177	1
BOK	3126	3313	0.76115	1
BOLA1	22	17	0.80965	1
BOLA2	1326	1183	0.581849	1
BOLA2B	1415	1127	0.270106	1
BOLA3	1403	1321	0.770333	1
BOLL	15	13	0.943834	1
BOP1	4533	4137	0.626654	1
BORA	1921	1764	0.66832	1
BPGM	1599	1525	0.815939	1
BPHL	1569	1343	0.444216	1
BPI	10	5	0.70507	1
BPIFA1	6	1	0.58893	1
BPIFA2	7	7	1	1
BPIFA3	4	3	1	1
BPIFB1	10	13	0.87717	1
BPIFB2	1	6	0.58893	1
BPIFB3	1	6	0.58893	1
BPIFB4	25	16	0.636258	1
BPIFB6	2	1	1	1
BPIFC	13	18	0.787568	1
BPNT1	4135	3935	0.793027	1
BPTF	4837	7142	0.0360828	1
BRAF	721	973	0.170263	1
BRAP	3993	3964	0.970156	1
BRAT1	4196	3268	0.186306	1
BRCA1	3628	2410	0.0328055	1
BRCA2	2959	3638	0.277696	1
BRCC3	1539	1716	0.58842	1
BRD1	3264	2930	0.572208	1
BRD2	21074	20425	0.863105	1
BRD4	6028	4632	0.157501	1
BRD7	8322	7957	0.807669	1
BRD8	11794	11102	0.740783	1
BRD9	4078	4194	0.882287	1
BRDT	73	67	0.878047	1
BRF1	4396	3440	0.193726	1
BRF2	2682	2804	0.818163	1
BRI3	4482	5068	0.511284	1
BRI3BP	1201	1136	0.791787	1
BRIP1	2492	2342	0.749997	1
BRIX1	4735	4629	0.904454	1
BRK1	3538	3869	0.636687	1
BRMS1	4253	3753	0.507015	1
BRMS1L	2776	3220	0.438202	1
BROX	1598	2221	0.0961894	1
BRP44	2327	2126	0.644323	1
BRP44L	2136	1503	0.0770446	1
BRPF1	5067	4842	0.808365	1
BRPF3	5397	6071	0.526559	1
BRS3	0	3	0.729462	1
BRSK1	3481	2741	0.210728	1
BRSK2	2112	1572	0.136781	1
BRWD1	5723	8128	0.0579569	1
BRWD3	1841	2389	0.183924	1
BSCL2	3680	3720	0.955465	1
BSDC1	11035	11005	0.988503	1
BSG	17612	25776	0.036001	1
BSN	106	111	0.924285	1
BSND	4	5	1	1
BST1	24	15	0.62759	1
BST2	15976	11692	0.086966	1
BSX	0	4	0.610361	1
BTAF1	8063	10811	0.110074	1
BTBD1	10458	10371	0.963969	1
BTBD10	8543	9388	0.607423	1
BTBD11	525	470	0.651283	1
BTBD16	9	13	0.812544	1
BTBD17	32	9	0.166587	1
BTBD18	55	54	1	1
BTBD19	569	494	0.556246	1
BTBD2	3341	2638	0.21709	1
BTBD3	2799	2749	0.926604	1
BTBD6	2604	2561	0.932719	1
BTBD7	3824	4360	0.486032	1
BTBD8	61	66	0.89683	1
BTBD9	1206	1733	0.0742094	1
BTC	1	3	0.882021	1
BTD	366	348	0.854921	1
BTF3	36049	38619	0.702767	1
BTF3L4	4443	4251	0.814596	1
BTG1	4381	3757	0.414543	1
BTG2	24403	20921	0.395356	1
BTG3	6137	6684	0.64485	1
BTG4	4	6	0.91251	1
BTK	25	29	0.878114	1
BTLA	48	48	1	1
BTN1A1	13	13	1	1
BTN2A1	3938	3642	0.679601	1
BTN2A2	3441	2936	0.405216	1
BTN3A1	1204	1187	0.948428	1
BTN3A2	3013	2377	0.218428	1
BTNL10	7	2	0.632682	1
BTNL2	1	11	0.281799	1
BTNL3	2	3	1	1
BTNL8	21	21	1	1
BTRC	3028	3231	0.734535	1
BUB1	9898	7532	0.137248	1
BUB1B	7469	6336	0.373233	1
BUB3	24596	24663	0.988179	1
BUD13	2211	2043	0.687638	1
BUD31	5911	5916	0.997088	1
BVES	17	30	0.504775	1
[truncated: 16,304 more rows]

## Sheet: TableS6-shRNA-p53
	Supplementary Table S6: TP53 Dependent shRNA
	Gene	Arg2 Count	Arg1 Count	Pro2 Count	Pro1 Count	WT Count	KO Count	p53 vs KO p-value	Cumulative Error
	XCR1	18	8	9	10	5	0	0.000109885	0.000109885
	TP53	18	19	15	23	11	4	0.000389318	0.000499202
	SRD5A2	8	9	9	11	6	0	0.000393737	0.00089294
	HSP90AB1	9	6	9	6	11	0	0.000566982	0.00145992
	EPHB4	4	7	7	9	14	0	0.000566982	0.0020269
	MTRR	1	22	12	8	9	1	0.000737653	0.00276456
	CELSR1	12	7	10	9	11	1	0.00120873	0.00397329
	HOXC13	4	7	7	7	11	0	0.00141083	0.00538412
	PLA2G2D	13	10	9	7	9	1	0.00142411	0.00680823
	STAT6	8	6	7	19	8	1	0.00142411	0.00823233
	HIP1R	13	8	7	3	3	0	0.0020316	0.0102639
	VEGFC	5	8	8	11	2	0	0.0020316	0.0122955
	CLDN16	5	11	7	6	3	0	0.0029255	0.015221
	BBOX1	8	7	9	7	11	1	0.00377988	0.0190009
	CAMK2A	6	10	9	12	5	1	0.00377988	0.0227808
	ACSS1	4	8	4	11	3	0	0.00421272	0.0269935
	RANBP1	6	12	4	7	12	1	0.00444136	0.0314349
	MAFF	6	11	3	4	5	0	0.00505526	0.0364901
	TLR1	4	11	7	4	3	0	0.00505526	0.0415454
	CHRNA2	4	6	11	5	2	0	0.00606632	0.0476117
	ABCA1	10	6	2	1	6	0	0.0104826	0.0580943
	PICALM	10	9	15	6	18	4	0.0158263	0.0739206
	LPA	9	8	15	12	5	3	0.0184088	0.0923294

## Sheet: TableS7-shRNA-Arg
	Supplementary Table S7: Arg Dependent shRNA
	Gene	Arg2 Count	Arg1 Count	Pro2 Count	Pro1 Count	WT Count	KO Count	Arg vs Pro p-value	Cumulative Error
	FECH	5	13	0	0	8	5	3.8147e-06	3.8147e-06
	GNRH1	9	16	0	3	3	5	1.37202e-05	1.75349e-05
	EED	9	7	0	1	5	1	0.000137329	0.000154864
	DTX4	17	12	6	1	14	13	0.000156276	0.00031114
	IRAK3	9	10	1	2	3	4	0.000427723	0.000738863
	COL2A1	9	13	1	4	9	11	0.00075686	0.00149572
	RTKN	8	9	1	2	5	4	0.00128841	0.00278414
	PHF1	9	8	1	2	2	4	0.00128841	0.00407255
	HRH2	6	6	1	0	2	0	0.00170898	0.00578153
	ABCA1	10	6	2	1	6	0	0.00221252	0.00799406
	POLR3GL	9	10	4	1	6	1	0.00330538	0.0112994
	MS4A1	9	6	2	1	3	1	0.00376892	0.0150684
	PDLIM5	10	13	2	6	6	4	0.00533692	0.0204053
	ABCB1	9	7	1	3	9	3	0.00590897	0.0263142
	GPLD1	12	7	3	3	3	3	0.00731665	0.0336309
	PRKCH	12	7	3	3	0	3	0.00731665	0.0409475
	SOCS1	8	7	2	2	0	4	0.00960541	0.0505529
	PRDM1	23	11	11	6	11	15	0.0120465	0.0625994
	ME1	9	7	3	2	9	4	0.0133018	0.0759013
	HS2ST1	10	12	6	3	2	11	0.0147247	0.0906259

## Sheet: TableS8-shRNA-Pro
	Supplementary Table S8: Pro Dependent shRNA
	Gene	Arg2 Count	Arg1 Count	Pro2 Count	Pro1 Count	WT Count	KO Count	Pro vs Arg p-value	Cumulative Error
	PIP5K2B	1	1	10	8	3	4	0.000201225	0.000201225
	MTHFS	1	2	9	11	3	4	0.000244141	0.000445366
	PAK2	1	1	8	9	3	4	0.000364304	0.000809669
	OGDHL	0	1	7	7	3	1	0.000488281	0.00129795
	LARS	1	0	7	7	2	4	0.000488281	0.00178623
	KCNB1	1	1	9	7	3	3	0.000656128	0.00244236
	FPGT	1	0	7	6	5	0	0.000915527	0.00335789
	CDK8	1	0	7	6	6	3	0.000915527	0.00427341
	GCH1	0	1	7	6	3	3	0.000915527	0.00518894
	S100B	1	1	7	8	2	1	0.00117493	0.00636387
	C4BPB	3	0	10	7	11	3	0.00128841	0.00765228
	DPYD	3	3	10	12	3	1	0.00185958	0.00951187
	PROC	4	1	9	11	5	4	0.00203866	0.0115505
	CFTR	1	2	9	6	3	1	0.00376892	0.0153194
	HAO2	1	2	7	8	2	4	0.00376892	0.0190884
	ALG10B	3	3	9	11	3	3	0.00467765	0.023766
	CABIN1	4	0	8	8	8	3	0.00590897	0.029675
	ATG7	1	3	7	9	9	4	0.00590897	0.035584
	CNR1	0	3	8	6	0	0	0.00636292	0.0419469
	TOB1	1	2	8	6	3	4	0.00636292	0.0483098
	GPRC5B	3	3	8	11	2	4	0.00731665	0.0556264
	DAB2	4	1	8	9	3	1	0.00845027	0.0640767
	FLT3LG	3	2	7	10	0	4	0.00845027	0.072527
	PIK3R4	4	3	12	8	3	1	0.00957865	0.0821056
	BTLA	3	1	8	7	2	0	0.00960541	0.091711
